# Supplementary material for: Distinct transcriptomic signatures define febrile malaria depending on initial infective states, asymptomatic or uninfected
Source: BMC Infect Dis. 2024 Jan 29;24:140. doi: 10.1186/s12879-024-08973-2 (PMC10823747; doi:10.1186/s12879-024-08973-2)
Supplement: Supplementary file 1 — Additional file 1: S1 Table. Participants metadata. S2 Table. Normalized parasite RNAseq read counts of 16 AF pairs. S3 Table. Differentially expressed host PBMC genes across A, U and F groups. S4 Table. Functional GO and KEGG analysis of host PBMC genes. a) KEGG analysis results from genes differentially expressed in each cluster. b) Gene Ontology (GO) analysis results from genes differentially expressed in each cluster. P.adjusted represents the Benjamini-Hochberg adjusted P-values and was used to sort the GO terms. BP represents the Biological Process category. S5 Table. Differentially expression analysis of host PBMC genes between A and U groups. S6 Table. Differentially expressed analysis of host PBMC proteins across paired AF and UF groups. [file 12879_2024_8973_MOESM1_ESM.xlsx]

## Sheet: Supplementary Table 1
Condition	treatment	Pair	Parasitemia	Sex	Age
A	Asymptomatic	16A	560	M	13.1417
A	Asymptomatic	20A	1160	F	12.0465
A	Asymptomatic	24A	11280	F	10.6119
A	Asymptomatic	27A	8080	F	11.0691
A	Asymptomatic	28A	2720	F	9.29774
A	Asymptomatic	36A	920	F	1.87543
A	Asymptomatic	42A	280	F	1.97673
A	Asymptomatic	43A	400	F	0.804928
A	Asymptomatic	6A	144	M	7.77823
A	Asymptomatic	10A	220000	M	8.27652
A	Asymptomatic	11A	2040	M	6.41752
A	Asymptomatic	12A	180000	F	8.64066
A	Asymptomatic	18A	176	F	8.57495
A	Asymptomatic	23A	160	F	3.75359
A	Asymptomatic	25A	1680	M	5.71116
A	Asymptomatic	26A	760	M	10.6201
A	Asymptomatic	32A	4960	F	5.71937
A	Asymptomatic	33A	880	F	9.06776
A	Asymptomatic	34A	9960	F	7.71253
A	Asymptomatic	40A	1400	F	11.1622
A	Asymptomatic	41A	8560	F	2.34086
FA	Febrile	10FA	11600	M	8.49555
FA	Febrile	16FA	480	M	13.6235
FA	Febrile	20FA	680	F	12.3888
FA	Febrile	24FA	480	F	10.9405
FA	Febrile	27FA	880	F	11.5647
FA	Febrile	28FA	13440	F	9.41547
FA	Febrile	36FA	1280000	F	1.93566
FA	Febrile	42FA	200000	F	2.31896
FA	Febrile	43FA	270000	F	1.40725
FU	Febrile	1FU	80000	M	6.37645
FU	Febrile	2FU	34720	M	11.4059
FU	Febrile	3FU	400000	F	7.80014
FU	Febrile	4FU	8040	F	11.2772
FU	Febrile	5FU	8000	F	11.3758
FA	Febrile	6FA	13000	M	7.87406
FU	Febrile	7FU	16720	F	12.6023
FU	Febrile	8FU	160000	F	8.44627
FU	Febrile	9FU	21440	F	14.8036
FA	Febrile	11FA	80000	M	7.06092
FA	Febrile	12FA	13600	F	8.91992
FU	Febrile	13FU	170000	F	6.45312
FU	Febrile	14FU	230000	F	9.49487
FU	Febrile	15FU	31160	M	9.73032
FU	Febrile	17FU	4400	F	11.2827
FA	Febrile	18FA	3280	F	9.13073
FU	Febrile	19FU	50000	M	7.718
FU	Febrile	21FU	15800	M	5.87817
FU	Febrile	22FU	33800	F	9.85352
FA	Febrile	23FA	230000	F	3.83299
FA	Febrile	25FA	110000	M	5.73853
FA	Febrile	26FA	4080	M	10.8912
FU	Febrile	29FU	310000	M	10.2177
FU	Febrile	30FU	30000	F	3.81383
FA	Febrile	32FA	13200	F	5.78234
FU	Febrile	32FU	2960	F	13.2841
FA	Febrile	33FA	3200	F	9.57974
FA	Febrile	34FA	230000	F	7.93703
FU	Febrile	35FU	350000	M	2.4668
FU	Febrile	37FU	410000	F	2.40931
FU	Febrile	38FU	7840	M	1.38535
FU	Febrile	39FU	16440	M	1.04312
FA	Febrile	40FA	290000	F	11.5674
FA	Febrile	41FA	24840	F	4.06023
U	Uninfected	1U	0	M	6.26968
U	Uninfected	2U	0	M	11.3183
U	Uninfected	3U	0	F	7.73717
U	Uninfected	4U	0	F	11.091
U	Uninfected	5U	0	F	10.9185
U	Uninfected	7U	0	F	12.3176
U	Uninfected	8U	0	F	7.46064
U	Uninfected	9U	0	F	14.5845
U	Uninfected	12U	0	F	6.39014
U	Uninfected	14U	0	F	9.22656
U	Uninfected	15U	0	M	9.36893
U	Uninfected	17U	0	F	10.6557
U	Uninfected	19U	0	M	7.58385
U	Uninfected	21U	0	M	5.72485
U	Uninfected	22U	0	F	9.66461
U	Uninfected	29U	0	M	9.89185
U	Uninfected	30U	0	F	3.67967
U	Uninfected	32U	0	F	12.8871
U	Uninfected	35U	0	M	2.31622
U	Uninfected	37U	0	F	2.11636
U	Uninfected	38U	0	M	1.33881
U	Uninfected	39U	0	M	0.821355

## Sheet: Supplementary Table 2
Normalized parasite RNAseq reads after adjusting for library size, life-cycle stage and 3 factors of unwanted variation
Gene_ID	1A	15A	5A	1F	2F	3F	6F	14F	10F	16F	2A	8F	15F	4F	5F	7F	4A	7A	9A	11A	12A	3A	13A	9F	11F	12F	13F	6A	14A	10A	16A	8A
PF3D7_0100100.1	5.90882	9.48768	4.45931	5.57111	4.86706	6.04486	4.99336	3.94035	3.4706	4.04335	6.1673	1.1208	3.15769	6.29343	3.05407	6.2026	8.81708	7.69545	7.98287	5.94809	7.55825	6.92051	7.35198	6.18261	3.75404	5.27197	6.09492	7.20366	9.76874	5.94046	11.0236	4.21397
PF3D7_0100200.1	0.397077	-2.67348	-2.13343	1.7477	-0.128941	-3.45272	-0.217677	-2.80051	-2.96115	-0.404539	1.01491	-2.08895	0.598197	-0.445643	-2.59293	2.532	-2.46265	-3.7041	-0.484616	-3.21945	1.3191	-3.93194	-1.6156	-1.81905	-1.52428	1.99173	-2.69664	0.705656	5.87982	-3.32076	-2.35997	-0.701823
PF3D7_0100300.1	4.44167	0.930309	2.19163	3.20323	-0.489083	-1.94579	1.74257	2.88942	-0.542234	-0.576959	4.78162	3.45877	2.04559	3.99714	-0.208691	4.9154	2.35394	2.11757	2.14947	4.08629	3.67348	1.63668	-0.0193678	3.62383	1.82295	2.22117	-1.52059	4.64269	3.24339	-1.2573	3.81172	-0.291019
PF3D7_0100500.1	12.1739	7.20177	7.6875	6.37003	9.64102	5.14123	11.4906	8.07201	12.5002	5.45293	12.0629	9.26876	13.1425	9.86586	7.04868	9.77463	5.3734	8.4707	10.0133	3.74959	10.3829	6.60149	5.87629	5.13444	11.8499	5.07815	6.03196	3.14671	7.42445	4.24694	7.29381	6.59459
PF3D7_0101100.1	6.37145	7.68998	-0.041136	7.76233	5.67504	6.7528	4.99788	7.40458	6.39847	6.71279	6.94018	9.5824	8.0052	4.03043	7.30628	7.29577	0.965524	6.41192	6.8203	6.57331	6.08425	7.35957	5.61453	6.58025	7.34242	-2.34208	8.92832	5.6942	7.99621	6.38281	10.3769	7.01866
PF3D7_0101200.1	7.85885	11.3405	4.5995	10.651	7.31341	10.787	9.89913	11.3162	11.8158	9.54225	4.6353	3.42249	10.8866	7.3085	9.48406	7.76614	1.37699	5.855	6.98617	7.89964	8.02851	7.14229	8.17308	8.06607	9.45421	9.5107	10.0368	7.77897	10.6229	4.92841	3.09652	10.4076
PF3D7_0101500.1	5.63293	2.01497	2.82771	5.98626	3.28823	4.33189	4.13542	2.32935	5.88217	5.50243	4.90854	7.2434	7.53605	6.70078	7.80188	5.93255	1.10543	4.02554	4.72782	4.68985	2.85936	2.8303	6.22663	6.32637	1.69287	5.52984	9.11126	4.85503	3.52466	4.141	2.63068	5.41029
PF3D7_0101600.1	3.22926	1.06506	1.83269	7.37887	6.77026	-0.763726	4.84688	1.29918	3.48904	4.04947	1.9592	2.33728	4.16942	3.85463	1.07934	3.65669	-0.0858204	0.0619866	1.38674	-1.28364	4.07142	1.24674	1.31946	0.629414	4.10552	-0.727122	0.396491	2.72679	2.21941	-0.732424	1.10193	1.32862
PF3D7_0102200.1	6.97665	8.16051	7.1758	10.0933	12.2419	11.7496	12.6479	8.78125	12.0855	11.5713	8.0097	9.85784	11.7818	9.29232	9.54698	8.96546	5.52472	4.69158	5.22483	7.61349	9.5199	9.5993	8.73892	9.10174	10.9075	11.1423	7.93472	7.83228	9.63457	7.40257	7.47872	8.65421
PF3D7_0102300.1	3.63923	5.31397	-0.6258	-3.62785	0.499454	-2.0753	1.18102	0.828348	1.95309	0.864496	-1.68187	1.89823	1.98116	0.296627	0.87002	-0.931121	-0.64121	0.594463	1.2465	3.33417	2.21472	3.39671	1.69386	-2.44231	1.19576	-0.176044	1.53646	2.05737	0.0912679	1.85279	-1.30328	1.9731
PF3D7_0102500.1	0.928974	1.72918	3.59597	0.53698	1.17223	1.85927	1.83895	1.09391	1.30871	1.01988	1.60113	0.209208	0.889475	0.778965	0.0222299	1.41874	1.82655	0.0530007	-0.751848	-1.00357	1.60147	1.92797	0.857228	1.76658	0.282431	1.14759	1.94755	1.09171	-0.744263	2.92235	0.0101347	0.810839
PF3D7_0102600.1	7.86356	6.56911	7.38041	11.2856	11.2234	11.888	9.64553	12.2666	9.86736	9.52317	9.39651	12.3751	9.88383	7.05165	8.9271	8.80621	7.39625	5.42389	4.04382	8.74763	9.91053	11.2521	8.28697	8.68965	9.41772	10.5318	10.1108	7.93401	13.0363	6.10696	4.53329	8.91722
PF3D7_0102700.1	2.81101	5.44118	-2.41607	4.52893	5.84345	6.92082	4.94061	5.17326	5.2009	4.85404	3.8569	4.84595	5.43498	6.76284	2.80937	5.32201	-0.83974	1.33123	1.05734	2.40339	5.30263	4.53822	3.26287	3.7796	5.37279	5.17085	3.03961	2.83546	4.90947	0.940061	4.61554	-0.0153034
PF3D7_0102800.1	-4.99097	-2.40184	-8.37794	-5.29802	-5.03818	-9.47195	-3.85656	-4.58681	-3.28437	-4.94353	-8.20934	-4.66079	-4.32463	-9.40891	-5.109	-6.16399	-8.34311	-6.16247	-6.46384	-4.95651	-4.73676	-4.45177	-7.12266	-7.08485	-1.72997	-4.68635	-9.63395	-4.55108	-2.3819	-8.36352	-5.0451	-2.29747
PF3D7_0102900.1	6.77182	7.0127	8.03081	7.70214	6.97118	7.63546	7.1422	7.24993	6.90948	7.39329	6.70639	6.69959	6.82855	6.97722	8.85859	6.85871	8.1912	7.59373	8.07078	7.5583	5.04971	5.60349	8.00004	8.68924	7.13793	7.39338	6.89961	7.08105	4.78798	7.43354	7.74754	8.41265
PF3D7_0103000.1	2.77327	-1.05123	-0.634556	0.811057	-0.440134	-2.04224	0.594602	2.0015	-0.0679786	0.257506	-1.95339	-1.94312	-0.312279	-0.112325	0.108937	-1.83277	-1.41978	1.39138	0.230457	-1.8294	0.762598	2.10364	-1.6084	-1.80667	1.28677	-0.736871	2.27436	1.04565	0.120629	-2.04228	3.69238	-0.502656
PF3D7_0103100.1	7.52987	9.80371	5.09842	7.34914	8.33955	9.16316	8.31898	7.65129	7.28515	7.13678	8.53611	5.70409	7.6323	10.064	5.21334	7.63994	10.566	7.26929	7.8525	8.24825	10.3419	9.7473	7.50926	6.68307	7.5661	7.0609	8.23766	8.02152	11.4394	8.96984	8.52622	4.72965
PF3D7_0103200.1	8.12715	11.9212	5.21693	9.4802	9.00647	8.80764	8.15504	7.55696	7.16833	7.80657	8.39949	10.3082	7.62267	6.95944	9.43595	7.24099	7.75415	8.61396	7.66567	7.28564	6.94998	8.39055	10.3679	8.6948	8.47443	7.13998	6.17383	8.74657	6.03314	9.08164	8.93951	10.3273
PF3D7_0103300.1	6.47868	6.27774	6.9991	7.57142	6.79519	6.95453	7.80111	7.64401	7.19633	7.85925	6.72618	6.69428	7.32306	8.08543	7.78549	6.63272	7.07686	7.90403	7.89811	7.41972	6.67084	7.05649	6.96102	7.21695	7.5398	7.2638	6.95083	6.52091	6.4408	7.61704	6.93007	7.00349
PF3D7_0103400.1	13.0161	15.75	17.3011	14.6148	14.3908	15.1448	14.8956	15.0421	13.6841	14.0078	13.2902	12.901	13.0088	11.0647	14.6471	13.7706	13.5228	13.5344	13.7989	14.3971	12.9045	12.9024	14.5177	14.5898	13.9886	14.7529	15.5664	12.8903	13.7108	13.5591	9.48555	16.8968
PF3D7_0103500.1	6.46201	4.34424	4.6707	5.04089	4.38677	5.08095	5.07657	4.15035	4.17157	3.67207	5.76111	4.86628	5.43018	5.71594	4.56065	6.27997	3.00175	4.57123	4.63423	7.28992	5.60551	4.24042	2.853	4.59207	6.14721	3.36637	6.74804	5.92978	4.90842	6.72052	9.52767	3.73958
PF3D7_0103600.1	9.24779	10.2867	11.6285	9.52417	8.91953	10.0026	8.45585	7.69982	7.57401	8.74738	8.83475	5.44864	7.75763	6.01875	8.17093	9.10667	10.5621	9.80596	9.63984	10.401	9.56174	9.09848	9.83948	9.42506	8.39911	9.22082	9.82026	8.96099	12.6235	9.6709	12.5384	10.9258
PF3D7_0103700.1	5.75804	11.1191	4.47575	7.35226	5.74456	7.89662	5.60528	7.77608	4.43781	4.97725	4.94608	3.21983	4.19043	6.5987	4.79661	6.45893	2.90934	6.75065	6.37492	6.45404	7.14113	6.53308	7.99332	1.41562	7.37915	5.27913	7.90279	5.63259	4.65185	7.79128	3.73486	5.8322
PF3D7_0103800.1	14.3554	14.0826	14.0468	18.8638	14.3448	12.0682	14.9059	13.2976	13.1867	14.4858	14.9185	13.711	15.687	13.2602	13.8167	14.4429	9.978	14.3392	14.0932	9.86911	15.1172	13.5416	15.2131	13.6937	13.9111	13.1449	9.61144	15.2462	13.9976	15.7923	12.1376	17.2917
PF3D7_0103900.1	14.4777	13.2078	13.3278	15.0375	13.4946	14.1494	12.5982	15.1653	11.5551	12.4454	12.8817	10.8387	11.7104	14.0149	12.0134	14.8898	9.88519	14.4204	13.647	12.0995	14.8537	14.7318	13.626	12.7315	12.6257	12.9228	15.2367	12.5903	13.6063	16.3881	18.0926	11.9828
PF3D7_0104000.1	16.0408	16.373	15.7169	14.2916	17.3648	15.21	17.9514	14.658	14.4565	15.5538	13.4384	14.9176	14.242	15.7251	16.6629	14.4679	14.2251	16.7238	18.6971	13.5826	14.1829	14.1467	15.584	16.4475	15.0579	17.0227	18.6913	13.4628	15.1892	12.3942	15.3365	15.3173
PF3D7_0104100.1	8.38927	7.06325	7.14616	7.41181	6.92612	5.46054	9.49364	4.8454	7.7457	8.023	8.74564	10.9394	6.70051	7.76928	8.39918	8.6091	10.9097	7.05604	8.04946	6.89566	7.68178	9.90821	8.14716	7.31906	8.19351	8.18208	8.81237	8.45361	7.25686	9.30562	12.3649	7.56492
PF3D7_0104200.1	6.63337	10.1462	4.82844	5.96602	6.35324	4.22902	6.29675	6.9175	4.85584	5.581	6.7209	1.57928	5.50218	6.83835	3.60947	5.68423	8.386	5.03768	4.5737	5.60611	7.59212	8.30609	5.03757	5.73251	6.64217	6.01624	6.0861	6.69989	5.62833	5.65489	10.5421	3.74682
PF3D7_0104300.1	6.78061	6.837	6.35205	6.62204	7.62048	7.32589	8.35326	7.31585	8.27694	7.85618	6.55275	7.70632	8.01302	8.1167	7.63307	6.7035	7.60726	7.01604	7.28977	8.05107	7.23641	7.65948	6.7201	7.00819	8.14368	7.94073	7.21218	6.52755	7.6317	6.426	6.84622	6.46373
PF3D7_0104400.1	6.59005	8.74333	6.50924	7.93282	8.64943	7.64382	9.22568	8.02601	8.72803	9.06217	5.68548	8.36845	8.53082	8.70866	7.20647	7.34843	5.95782	7.04251	6.40519	6.86448	8.3088	7.60798	7.32747	7.19426	7.32864	8.43766	7.63877	7.19135	8.40888	6.1198	0.690578	7.08951
PF3D7_0104500.1	9.72879	11.2372	13.4916	7.82139	7.10083	9.01899	6.73153	5.01544	5.8905	6.12072	10.2903	8.38091	5.58325	6.79636	3.81338	9.23668	12.3955	10.2288	10.0242	10.313	12.0987	12.3562	8.96476	8.36747	7.30699	5.01782	8.00962	10.2814	10.8589	10.3279	13.1988	7.20381
PF3D7_0104600.1	7.59015	4.73971	5.55875	4.94439	5.33322	7.02112	5.68198	8.09001	6.80548	6.8376	7.2434	6.5784	7.28673	6.36758	8.99601	5.18838	8.37317	7.67099	6.76289	8.20555	5.13353	6.14994	7.6663	5.6536	6.36064	6.61393	7.85337	6.64943	6.53404	7.94366	7.00892	8.21613
PF3D7_0104700.1	5.96989	4.989	4.51828	5.35602	4.17867	8.78235	7.52109	5.22401	5.52304	6.29424	7.829	5.35824	8.02816	10.4014	6.04411	6.81853	4.56133	6.61399	5.83324	4.44029	6.64217	4.8693	6.83688	3.31785	6.91061	7.37333	8.43871	7.49488	4.62735	3.73923	4.57119	3.31905
PF3D7_0104800.1	6.46325	6.95713	7.40223	4.12096	10.925	9.28611	8.49932	10.1521	8.81673	9.37086	3.82514	10.7111	9.54401	8.13233	8.82352	8.30494	4.90285	6.54144	7.11085	8.47508	7.39484	8.08722	6.77658	8.50207	8.24418	8.39104	10.6044	7.66642	7.4637	7.1537	5.92173	6.18633
PF3D7_0104900.1	11.4036	11.8156	12.6925	7.29096	12.6627	16.1097	13.4809	9.05244	13.6603	13.0153	14.0459	10.3062	14.9573	15.2107	13.5108	5.76932	8.64492	14.1647	14.0868	14.5948	12.9243	10.4926	6.56054	12.9743	13.5615	14.4445	15.797	13.2592	12.2406	17.6225	10.8738	12.0899
PF3D7_0105000.1	12.5121	11.6632	12.9618	14.9587	12.5011	14.0488	12.5175	7.26677	13.4036	11.8833	13.7036	17.0309	13.3275	15.7666	11.0154	11.7082	7.1494	14.0329	13.1621	14.5503	16.4123	15.431	13.3673	10.6869	10.9912	10.8627	12.7081	14.8629	13.3505	17.8121	9.82117	11.882
PF3D7_0105200.1	11.2678	10.4201	11.3227	11.1821	11.976	12.4041	8.6548	8.85771	10.1354	10.5832	11.9966	9.87223	10.6769	12.8502	9.40378	10.6141	12.0917	11.4457	11.4253	11.1658	11.8442	11.6104	11.4093	11.57	9.94314	11.4444	12.2347	11.9549	11.6144	6.28629	15.4925	7.51492
PF3D7_0105300.1	8.30249	7.22746	7.25897	6.39975	7.33668	10.6004	9.33671	7.03983	10.4135	7.38942	4.88021	7.60332	6.37173	7.90524	6.93745	7.87239	11.7244	6.62666	6.6901	5.04398	6.8082	6.16728	4.53558	9.65674	8.71786	7.98102	5.13918	4.97798	7.3895	11.6322	6.69223	6.07092
PF3D7_0105400.1	4.24837	4.25775	4.37844	3.75085	4.87347	7.87153	5.54049	4.2788	5.80662	5.79187	2.40699	4.82404	6.39137	4.98954	4.18141	2.34386	3.12599	5.05792	2.73792	2.63332	4.87403	5.3695	2.75829	7.27523	4.76407	5.53742	2.90592	5.16557	4.69307	2.53074	3.88826	3.40116
PF3D7_0105600.1	5.69874	7.55855	8.56686	5.48058	5.53005	6.47374	5.83468	5.50676	4.30023	4.56059	5.91824	4.82031	4.87242	5.6925	5.38145	6.36412	7.24783	7.29494	7.37656	7.40673	5.97913	5.93564	6.60743	6.61066	6.01835	6.02715	5.57652	6.94857	4.8837	7.60326	8.0676	6.25384
PF3D7_0105700.1	8.42247	9.58232	9.08648	10.3824	9.30977	9.69055	8.7679	8.91738	8.07297	8.46891	9.57663	6.22666	8.88754	8.45329	8.24104	8.66251	10.6366	8.72943	9.28235	8.38265	9.49738	9.08112	9.91011	8.53562	8.06433	8.22517	9.70619	9.14586	11.1114	9.91247	8.57228	9.56014
PF3D7_0105800.1	7.18083	10.4341	9.36059	8.99664	9.62069	7.96419	8.32711	8.85689	7.44887	8.11614	6.00762	6.10055	8.81218	5.04402	6.60046	7.01647	5.00243	5.75726	5.56145	4.53804	7.90962	7.88559	7.3156	8.73887	8.03004	6.03143	4.30409	7.35504	5.25204	9.78064	5.28884	9.7573
PF3D7_0105900.1	7.42998	11.0712	9.8095	9.07058	9.20604	8.92373	8.21333	9.13118	5.85055	7.54766	7.32836	6.87824	7.07869	3.06158	6.89327	6.7726	9.45928	6.27562	6.95476	4.37587	7.62975	8.49387	8.81482	8.09659	7.74491	6.59963	7.0445	7.63627	8.8292	6.54026	4.13629	10.8679
PF3D7_0106000.1	7.29479	11.3542	6.61484	8.44356	8.03531	8.54617	7.62096	7.75453	6.03233	7.42948	8.41074	7.74048	8.18137	8.2279	7.17619	7.78989	5.07877	7.63027	7.75756	7.69633	8.18531	8.15689	8.52839	8.21988	7.03199	7.33667	8.40949	7.17486	6.69464	8.4364	5.86668	7.72276
PF3D7_0106100.1	6.07423	8.60221	7.84912	5.6784	6.28911	6.64211	3.66667	6.02145	3.40334	3.97206	7.13431	6.62298	3.44694	2.63993	3.2148	6.71292	5.32404	6.28699	6.09492	6.2239	8.21739	8.16674	6.4441	5.58305	5.28107	4.99355	4.82954	7.05126	8.64341	7.97874	7.96206	6.86176
PF3D7_0106200.1	0.345326	-1.69885	4.54099	0.761599	1.52108	1.90731	1.82192	-2.62206	2.91867	2.24081	1.79248	-2.09308	2.20409	-0.0337613	-0.953847	-2.32217	4.66347	1.18711	1.57027	1.4354	2.3693	0.0943447	-1.63645	-1.63623	3.57882	2.38064	-2.50459	-2.47106	5.10947	-2.48885	-1.53406	0.711213
PF3D7_0106300.1	6.15442	4.84423	6.24519	5.62771	5.17892	6.00774	5.02091	5.78013	5.52837	6.05835	5.84908	5.9031	5.99103	6.48089	5.58322	5.82088	5.07585	6.29901	6.47063	5.5046	6.15076	6.1776	5.90893	6.25689	5.12313	6.6181	5.53593	5.79328	5.98808	5.4734	6.16166	5.24138
PF3D7_0106400.1	8.17378	8.85652	10.2194	8.71882	8.49255	9.49308	7.86193	8.10526	7.88924	8.66731	7.77749	9.66462	8.09765	9.96542	8.29194	9.11065	10.9258	9.72273	10.2438	10.4059	8.22574	9.04995	8.42131	9.97886	9.15637	8.56574	9.08019	8.54299	7.36556	6.92454	10.2277	6.53007
PF3D7_0106500.1	4.82877	6.39851	6.02391	5.16385	6.98379	5.30892	6.14708	5.37563	6.24102	6.25066	4.21534	6.7842	6.14542	4.5598	5.35889	4.90791	5.36219	4.17527	5.52976	7.11444	6.31009	6.7343	4.65582	4.73381	5.93979	6.41954	8.01187	4.62971	8.10406	4.36288	1.72063	5.69429
PF3D7_0106600.1	10.569	8.61306	8.92432	10.9308	9.72415	11.0853	10.3157	5.61169	11.1719	10.1943	5.45348	10.9388	10.5438	9.96719	10.4701	5.92984	6.81334	7.58442	10.0124	9.62405	9.19025	11.201	10.438	8.31685	9.25555	10.2642	11.3726	10.6555	8.88776	5.08845	7.63824	9.28801
PF3D7_0106700.1	5.99946	6.77654	4.69883	6.1727	6.56291	6.70108	7.25257	6.68201	6.94872	7.11098	5.70111	6.77499	6.87672	6.60992	6.88807	6.08824	6.39185	6.03997	6.49869	6.74016	6.10699	6.65715	6.70535	6.69871	6.85953	6.57674	5.94049	6.11085	7.13478	4.58477	6.30772	6.18242
PF3D7_0106800.1	6.87118	7.27148	7.73891	11.9996	8.53702	9.7276	8.11454	6.90069	6.0545	8.52334	9.04602	7.80526	5.53291	9.14699	7.27324	6.3961	12.8653	8.15372	6.58298	3.9416	7.41806	7.63457	4.77201	8.67037	8.59277	8.92103	10.4854	8.40587	7.78145	8.93631	6.70001	6.07865
PF3D7_0106900.1	13.4754	13.1383	13.2503	10.8709	13.835	15.0141	13.652	15.4775	14.6412	14.8012	13.7941	12.5662	14.7414	14.5548	11.5577	12.2516	10.1139	12.5322	12.5894	13.5239	15.5366	15.1719	13.5844	13.5687	13.053	12.1623	8.93295	12.3307	13.2558	13.2925	12.1011	12.0133
PF3D7_0107000.1	14.9186	13.2421	20.4391	15.574	15.3465	13.1074	16.1091	11.808	16.5692	14.5013	15.5922	12.0205	15.7133	13.9336	10.1466	13.1106	12.1777	13.9865	14.7233	16.7775	20.619	18.8688	14.5119	13.5527	13.0874	13.7032	9.61929	15.5372	19.8872	17.5847	12.9166	15.6465
PF3D7_0107300.1	15.7429	16.4364	16.1366	13.8989	17.9779	14.7523	18.6526	14.4109	18.3228	16.3938	13.534	14.7465	14.0737	16.6469	14.4831	14.1548	13.1636	13.9014	14.384	16.1505	17.9402	18.3076	16.1715	14.6474	14.5217	17.0231	16.0767	17.0606	16.1435	16.3217	14.9501	14.9252
PF3D7_0107400.1	4.72682	9.39883	9.47384	3.99567	4.88921	2.38903	5.39672	4.69555	5.10753	3.80605	5.78567	2.58664	5.2588	2.33886	5.35273	4.49516	8.82176	5.87918	5.98971	7.09871	4.51422	6.13793	6.86421	5.73561	5.53457	4.56205	4.01366	5.89246	2.33425	6.96691	6.95225	8.47948
PF3D7_0107500.1	9.73718	10.01	9.95939	9.22343	9.21428	8.62563	9.87918	9.02249	8.56475	8.96095	9.73021	9.52919	9.3659	9.40428	9.15764	9.63536	10.3962	10.0743	10.3304	10.0873	9.80437	9.78403	9.89994	9.55668	9.25188	9.14095	8.98454	9.95644	10.0065	9.54336	10.0308	9.68893
PF3D7_0107600.1	4.03224	5.80389	7.10627	3.67128	2.87607	1.75874	3.62919	4.19936	4.56798	2.41571	4.34648	3.73088	3.68072	1.53188	2.96306	4.31513	5.55387	3.77417	2.06082	3.98369	4.51435	6.00352	3.44896	3.31842	4.07826	3.95072	5.59194	4.54122	2.84658	3.93176	3.24748	4.90305
PF3D7_0107700.1	6.61142	7.63572	7.94448	9.66373	9.15437	8.32446	9.4802	8.07121	8.67545	8.35012	8.32947	1.40174	8.73079	6.97245	6.36024	7.79432	10.5417	6.45068	6.89278	2.1638	8.99894	8.2442	8.31342	8.14841	7.04411	7.48366	7.66933	8.45449	10.9969	8.63965	9.85586	8.27991
PF3D7_0107800.1	6.22181	5.35175	5.49402	8.7275	8.13286	9.11262	7.7626	4.85978	7.15158	8.68453	4.90568	7.70952	7.02152	11.0203	7.03446	6.50661	3.82572	5.85578	5.67735	7.38701	6.76732	5.51141	3.20808	7.57683	6.99926	8.22325	11.2938	5.9144	5.5462	8.80192	4.60301	3.23723
PF3D7_0107900.1	4.08228	1.81229	2.76076	-0.24582	2.87017	5.91006	3.16374	1.00041	3.3578	3.07961	3.87365	8.06437	4.20594	4.75686	2.66666	1.89398	6.55571	3.85065	2.3047	4.1169	4.37139	3.15435	1.16526	0.312987	5.9521	3.60185	-0.0471477	4.65105	3.11196	7.7213	1.48209	1.97663
PF3D7_0108000.1	5.95579	7.91815	8.39939	6.66288	6.23717	7.58568	6.71898	5.51735	4.92207	5.64707	6.43146	4.03159	3.95484	6.34237	3.38472	6.40665	6.73328	6.75677	6.71055	5.84943	8.10034	7.52152	6.84566	7.09813	4.80267	4.60974	4.65309	6.39582	6.95563	7.80787	6.77881	5.24423
PF3D7_0108100.1	11.2302	10.9112	10.8673	12.8981	9.86179	13.5604	11.0006	9.24031	11.2208	9.75	7.81292	9.81541	11.9178	11.8631	11.427	8.31092	9.13479	11.8013	10.875	10.7999	10.8678	11.6321	9.68958	11.4606	10.7935	12.9392	12.4842	12.2653	10.6651	13.448	10.2201	11.0486
PF3D7_0108300.1	8.79386	8.58324	8.5268	8.55445	9.47459	9.78944	9.69856	8.92893	9.38358	8.8453	8.78986	9.61545	9.76941	9.71269	9.53897	8.60601	8.90808	8.99189	9.25207	9.37102	8.75885	9.10698	9.14482	9.24241	9.22992	9.30519	9.28558	8.56637	8.77968	8.75562	9.04971	8.57346
PF3D7_0108400.1	6.12252	0.562125	6.12001	7.54041	5.72561	6.33646	5.54186	6.69097	6.37472	5.53708	6.19512	7.17232	6.11254	8.77898	4.70353	7.51193	6.38516	4.63827	4.8397	5.84059	6.75264	6.43201	5.36812	5.77582	5.49484	6.21736	4.61162	5.8342	6.21918	3.76917	6.59387	2.15385
PF3D7_0108400.2	2.95859	-0.75473	0.142945	1.77777	1.80894	2.77953	1.76102	-4.47983	2.36352	1.6248	4.78494	5.34638	2.96401	-1.51774	4.75607	-2.72602	6.67742	2.63223	2.01636	-3.4643	-0.865478	2.344	4.64498	-3.7797	4.06532	2.89537	2.7822	-2.62226	0.836463	-2.77901	3.85586	4.36115
PF3D7_0108500.1	7.03233	8.42623	6.71912	8.19133	8.88928	8.90037	11.2062	7.94438	10.7285	8.80727	7.09449	7.90071	8.88596	9.08989	8.3287	7.39036	7.01148	7.42298	8.2053	8.12044	8.80182	8.78494	8.33661	7.69847	9.37343	8.19515	7.00737	8.225	9.05843	7.06359	6.6639	8.02854
PF3D7_0108600.1	8.33204	10.5437	9.1658	10.6605	11.3249	11.3226	13.1604	10.11	12.5458	10.4805	9.62008	9.57809	11.0897	11.3914	10.1624	9.73243	9.903	10.0013	10.2109	10.0214	10.8777	10.4833	10.446	9.62935	11.8581	10.2032	9.0915	10.7729	11.0979	8.48923	8.89296	9.73725
PF3D7_0108700.1	10.0348	11.2152	10.2915	9.29503	10.3106	10.7395	9.28933	11.1982	8.59842	9.35869	10.1883	8.81212	10.1601	10.4464	10.5778	9.72965	10.2872	9.93043	10.5532	10.6716	9.05951	9.61324	10.4494	10.5203	10.2817	10.4311	10.533	10.1273	7.52577	10.9953	11.9568	9.85127
PF3D7_0108800.1	6.64029	6.15528	7.97411	3.66306	6.38677	6.04071	4.37629	5.6339	4.54143	4.5388	7.0356	5.77739	5.42565	5.69177	3.18917	6.73317	4.31801	6.45776	5.90624	5.47744	7.74076	5.84534	4.87264	6.15679	5.47061	4.92873	3.53585	6.72561	5.93109	5.72719	7.92314	4.28402
PF3D7_0109000.1	8.40886	12.2088	11.506	10.6248	10.0509	12.0314	10.9033	11.3923	8.91069	9.31974	8.69404	5.93463	11.6226	6.5702	6.55144	11.7004	8.3263	9.96274	9.56503	7.55332	12.7568	11.7332	10.7697	11.4275	9.71703	6.01055	5.31425	11.0076	14.2303	12.5447	12.2372	11.3609
PF3D7_0109200.1	5.84072	5.53938	6.2687	8.48032	4.79836	8.44704	6.76896	5.01209	6.80359	5.99628	7.75771	6.08186	5.5871	8.22016	5.80766	6.53477	3.45375	5.82608	6.15144	7.02352	6.93412	5.35902	3.72974	6.87449	6.76446	6.98168	8.26495	6.29806	6.36691	8.08697	5.13203	5.10336
PF3D7_0109300.1	11.2959	10.5217	16.7381	8.87475	11.9089	9.42551	13.5785	9.54986	12.7752	10.7996	13.083	10.0805	8.81572	11.2381	10.8392	12.6953	14.9156	12.7207	12.263	12.3536	11.8631	12.1207	12.3166	12.3532	10.9167	11.3506	12.4325	12.3363	9.96733	11.4124	17.0454	11.1065
PF3D7_0109400.1	11.6025	11.4152	11.5763	12.9182	11.9776	15.4933	13.2396	14.2477	12.345	11.7239	13.7172	10.6438	12.3452	13.2771	12.1883	11.5822	17.6181	12.5876	12.5839	14.0495	12.86	12.654	12.7162	12.8974	12.2613	12.2674	12.4308	12.9961	16.6144	12.9824	10.923	12.0434
PF3D7_0109500.1	11.4404	15.3301	13.2714	12.3437	10.8332	13.3379	11.3688	7.94821	9.54785	10.8264	11.5702	9.13198	12.5196	11.6222	12.1963	11.522	14.4573	12.0369	12.2436	11.5999	9.83631	10.8237	13.2352	12.6686	12.2594	12.707	12.1265	11.5199	7.42707	13.4066	16.3956	12.1456
PF3D7_0109600.1	8.17018	11.6322	13.2319	8.65072	5.83627	8.63438	5.80582	0.859535	5.34404	6.60457	8.09066	7.41842	6.70868	5.92266	4.87362	6.09855	10.8287	8.43785	9.27529	6.74314	7.3112	8.32383	7.99363	6.74065	6.48557	6.22782	8.87798	1.07035	4.12087	7.10142	3.32978	6.93011
PF3D7_0109700.1	7.69317	7.71776	8.20949	7.51933	6.82644	7.3193	7.8894	7.71906	8.78751	8.49551	7.14902	7.08601	6.44895	7.30532	7.33902	7.32779	8.08496	7.25572	7.43759	8.03439	7.90575	8.41559	7.76855	7.29523	7.79729	7.52904	6.87534	7.91441	7.51706	7.42625	7.44526	7.86836
PF3D7_0109800.1	5.88745	7.43096	8.5252	6.50757	5.63027	6.18393	5.65685	6.82588	6.04955	6.31337	6.42862	5.26539	5.59773	1.93063	5.7589	6.28397	6.5784	6.1925	5.87542	6.00816	6.51555	7.16368	7.1247	5.88476	6.93988	5.5453	4.35272	6.35663	7.80516	6.04429	7.16401	9.30988
PF3D7_0109850.1	12.6945	11.1955	10.7834	10.5829	11.7098	14.5792	14.6395	11.697	14.4125	12.8374	13.4378	12.3885	14.8704	13.1342	15.3287	11.5842	15.7209	12.5832	13.3088	13.3761	11.2148	11.6648	12.9481	13.7744	11.9456	14.7398	16.656	11.6717	15.8549	12.2173	11.6628	13.589
PF3D7_0109950.1	12.1412	12.8166	13.2379	9.95499	11.9615	10.1551	13.8021	11.1226	15.0227	13.1567	13.5487	11.9192	14.9678	15.0201	10.2988	13.6344	9.16841	13.676	11.949	12.9191	16.2359	13.6654	12.6165	11.4365	12.2118	13.2428	8.13154	14.8667	13.5268	14.1002	11.5396	11.7555
PF3D7_0110000.1	12.62	17.8933	11.9035	7.6552	11.208	13.5598	12.3205	14.7928	11.976	12.919	13.2894	9.14308	11.928	13.1916	10.342	13.6673	13.6966	13.5807	13.8632	14.8432	14.0739	14.5969	13.8902	12.3547	12.9574	10.4067	12.0741	11.0738	12.286	12.5403	16.3586	10.3479
PF3D7_0110100.1	6.64557	10.7652	10.861	6.85924	4.90385	6.6816	5.19459	7.00631	3.81502	5.86332	7.11077	5.84709	5.11903	3.92689	6.38976	6.63523	7.46058	7.98047	8.26193	7.76105	6.04141	8.055	8.11045	8.28059	6.62026	6.17329	6.48304	7.47385	3.61768	7.86116	8.82589	9.02112
PF3D7_0110200.1	8.26704	10.0183	3.58619	7.75704	5.8773	2.06721	8.57921	9.60255	8.43834	7.14573	6.93417	2.56796	6.62008	11.9417	5.85069	6.88863	10.1323	6.95134	6.40993	6.87939	8.47265	8.67883	8.7806	1.47393	7.13257	4.14396	8.10429	8.03342	3.58517	8.22201	3.24791	4.6436
PF3D7_0110300.1	6.92886	12.1981	10.6974	5.01977	4.52213	5.26349	6.87413	8.06514	6.8551	5.59043	6.91211	-0.987279	5.66662	2.26999	4.74311	4.83438	9.54795	5.21798	4.40905	6.37663	5.66459	6.28129	8.26565	8.32312	7.02161	4.70542	-2.93967	7.14709	1.35985	7.75638	8.58425	10.4938
PF3D7_0110400.1	7.5423	10.2878	9.09797	7.36562	6.06694	7.65771	6.10392	7.89298	5.91154	6.0104	7.76555	7.33305	5.65524	1.75627	6.67061	7.59137	8.34657	7.56045	7.50877	7.69656	7.41745	8.57845	8.02684	7.95261	7.7573	5.65047	5.70248	7.77647	9.40129	8.62708	9.48527	11.0014
PF3D7_0110500.1	9.30252	8.58384	11.0808	8.87472	9.08517	9.4396	8.65551	9.46302	8.63298	9.39978	9.09057	7.86807	9.55378	9.55419	8.86389	8.84747	9.79321	9.21908	9.85465	10.0777	9.35165	9.05221	9.23252	9.26306	9.0781	9.25863	8.46646	9.35025	8.64222	9.9743	9.29235	9.12478
PF3D7_0110600.1	7.73392	7.75906	8.00776	8.18155	8.06546	8.40116	9.27567	8.21207	7.87321	8.83575	7.5489	8.52834	8.9913	8.1107	8.81435	8.0632	8.60139	8.26197	8.63461	8.71029	7.88365	8.45925	8.26744	8.41996	8.85646	8.52256	8.10498	8.04881	8.83398	7.75075	8.63982	8.44588
PF3D7_0110700.1	5.744	5.22621	5.97639	6.49637	5.21498	4.81516	5.0446	5.6525	5.08845	5.69962	5.73153	6.26171	5.07753	3.95686	5.66637	5.30987	5.94047	4.65533	5.1715	4.50353	5.33822	6.52876	6.10876	5.31094	5.52129	5.35812	4.97955	6.19666	5.33836	5.03875	6.10515	6.65751
PF3D7_0110800.1	6.0854	6.12807	5.73604	6.48506	6.18751	6.72766	6.06642	5.67693	6.21515	6.54441	5.72092	6.97119	6.50518	6.36976	5.96263	6.24777	4.69285	5.63386	5.41909	5.5992	6.098	6.2286	5.83763	6.69093	6.0322	6.36914	5.74385	5.55282	5.481	5.58634	5.76859	5.54985
PF3D7_0110900.1	7.99693	12.5866	6.72341	8.45612	7.08715	8.83651	8.6601	10.8087	8.24106	7.96812	7.75157	4.43003	7.54701	7.32383	9.07593	6.17233	9.22745	8.97131	7.66826	8.14191	7.04595	8.06056	10.6089	8.50867	7.18994	7.63065	7.113	8.19458	6.71646	9.60332	4.52537	11.0153
PF3D7_0111000.1	9.44553	11.4015	7.1353	8.55085	9.23234	10.1459	9.4849	9.97181	9.37475	9.19704	8.65395	9.2502	9.99773	11.571	8.52881	9.14824	9.06528	8.64938	8.86257	8.54189	9.44818	8.99453	9.30868	9.19924	8.65963	7.5112	9.5933	9.45678	7.48536	8.98885	5.49862	7.33274
PF3D7_0111300.1	8.79236	9.53425	10.1185	9.73778	7.54906	9.41108	9.86383	8.82101	8.69295	8.99746	9.79604	8.05023	8.65818	9.97437	8.53461	9.59125	11.5919	7.95638	7.93196	8.40942	8.71095	8.93912	9.39137	8.70731	8.37822	9.25522	10.6786	8.77377	7.53688	8.92572	5.80825	8.29132
PF3D7_0111400.1	13.7466	11.384	11.0651	10.712	13.0729	14.0984	13.94	11.5243	13.7004	13.6221	12.8328	15.6602	12.7477	13.0088	13.0053	12.5586	9.62982	11.2417	11.084	9.70762	13.2681	13.273	12.9664	11.2683	11.5677	10.1514	15.1677	13.613	11.5319	15.2174	11.1784	12.5031
PF3D7_0111500.1	8.92932	8.02668	8.60921	10.8573	8.54214	8.75457	8.62972	7.91695	8.15907	8.43178	10.3413	8.73784	9.05486	8.11682	10.3751	8.1162	10.5371	7.87599	7.79132	8.96327	7.15522	6.99209	9.17786	8.85687	7.86469	8.12872	11.1592	9.46406	8.43949	9.2193	6.46852	10.7006
PF3D7_0111600.1	11.0719	14.5422	14.5231	8.85542	11.4258	7.20012	10.9167	9.96217	9.21064	10.6744	11.6986	10.7087	8.97551	7.49016	12.3757	11.1914	5.97969	10.7224	11.1191	10.1252	8.60915	7.59832	11.3994	12.1502	8.92426	12.1627	13.7465	10.6584	6.22652	9.98905	7.32248	14.9943
PF3D7_0111700.1	1.80775	-0.67091	0.466917	2.49402	-0.331213	1.0798	-0.517241	-0.473108	-1.14916	0.185314	3.05727	0.471831	1.61933	0.495394	1.74473	0.864504	-3.36806	0.48469	-0.29402	1.21619	0.461116	-1.94882	0.140367	-1.06561	-0.222142	1.12708	3.61522	0.667293	0.95515	4.26036	-1.8295	2.81299
PF3D7_0111800.1	12.1501	8.41635	12.5365	12.7538	13.1624	13.9385	12.1861	9.16723	9.452	12.7411	11.8003	13.0918	11.8483	17.4199	11.8705	11.8681	12.4832	12.1414	12.1845	13.1114	11.9551	11.9536	12.0499	11.7576	11.215	13.2782	14.0306	12.3303	8.74189	13.2731	15.2893	7.33492
PF3D7_0111900.1	10.7054	11.8482	12.839	16.9388	13.6679	17.2199	13.9458	18.8491	15.1145	14.311	13.619	11.2834	13.0351	13.0777	15.4303	13.0204	15.9287	13.4552	13.3053	13.6114	10.9506	11.1982	16.2377	15.0408	14.7402	12.6527	6.54357	11.8049	12.2898	14.2205	9.83704	16.202
PF3D7_0112000.1	3.21734	1.94865	3.0209	7.19416	4.07238	4.6591	3.54149	4.55376	3.45903	4.46549	3.38414	6.71118	3.09086	1.76176	7.37638	4.39016	5.59237	4.84201	4.09267	4.47365	1.27728	3.76779	5.88228	3.67519	4.88347	3.71765	4.93512	2.62377	3.46745	7.26304	6.10255	7.1498
PF3D7_0112100.1	-2.16349	-0.543984	0.198613	4.70313	3.09659	3.71607	2.08181	3.33758	3.01688	2.83979	3.15672	-2.82584	1.58892	1.08838	1.45808	-1.97822	-1.40735	1.28358	-0.444273	-2.15193	0.894397	-0.0524095	-2.14569	-2.58369	5.71242	1.48464	3.55223	-2.15022	0.962371	-2.26451	-1.36105	0.590574
PF3D7_0112200.1	5.46036	3.98923	4.45692	6.89709	8.75312	6.67346	4.81423	7.70794	5.1887	5.98877	6.55609	4.60493	5.1965	7.70389	7.40675	4.82601	5.37833	5.31409	5.27826	5.94844	4.5154	4.42924	7.25092	7.27772	3.58732	6.78093	6.77386	5.97818	4.50723	7.11463	6.32538	5.64368
PF3D7_0112700.1	5.20477	4.94337	5.03362	7.07876	6.24774	5.88844	8.49468	7.17814	9.24507	5.29276	5.85699	2.72924	5.86569	5.61507	4.74148	5.25053	8.67378	5.05288	4.34689	0.842901	7.03641	7.71528	6.37491	6.70842	4.49749	4.37069	5.11172	6.51435	8.30094	5.66133	4.77219	5.88023
PF3D7_0112800.1	1.74182	2.57057	2.37193	4.24923	6.95956	7.31435	5.81538	4.25773	5.89467	5.74154	3.71426	3.80152	5.66465	5.54646	2.76603	2.96522	-1.15071	2.08909	0.256386	3.88516	5.92624	4.90181	3.61207	1.66638	5.65223	5.19525	1.87448	2.42043	4.57283	2.62934	2.10296	1.86281
PF3D7_0112900.1	10.4694	11.0375	10.1894	7.80245	7.66005	8.54666	7.07692	8.06758	6.99476	7.09735	10.3387	7.50205	7.26832	9.53591	6.29842	9.31581	11.3155	9.60073	9.6029	10.8399	10.5699	9.52917	9.90828	9.09037	6.82379	8.75621	7.0332	9.64778	10.0895	9.33267	9.12595	7.79077
PF3D7_0113000.1	17.9908	19.6291	17.8597	16.6169	17.2567	18.9553	17.0668	16.4098	14.6752	17.4307	17.6067	17.6496	16.4867	18.6026	16.7188	17.7252	18.508	17.4079	18.3623	19.2384	17.7154	17.2953	18.2913	18.5656	16.4298	18.3553	17.5033	18.5037	17.3522	17.9599	17.7295	16.5469
PF3D7_0113100.1	7.12058	5.4498	5.83202	8.98279	8.07916	9.68183	7.85517	10.5969	8.02307	7.00287	6.96048	8.24289	8.15755	9.70505	9.22511	7.31928	8.76105	5.5614	6.73327	7.91104	5.91479	6.2642	7.62173	6.67699	8.64085	9.17912	8.28247	7.24498	5.77851	7.40294	3.80677	6.59703
PF3D7_0113200.1	7.73077	10.1134	9.2758	9.0057	12.4571	10.3847	9.23585	10.4302	8.40064	9.48673	8.14449	9.76672	8.96908	6.70236	9.34648	7.74638	9.51087	6.75429	6.85065	9.84428	8.35856	10.7677	8.60039	10.3105	9.7595	9.21172	9.50813	7.38563	8.51387	9.62315	10.9001	9.32133
PF3D7_0113300.1	3.59009	4.18198	2.00141	5.37747	6.4477	7.70423	5.33142	5.70033	6.14063	6.36034	3.44656	6.33489	6.17966	7.18533	6.49304	5.32774	6.08676	5.23082	4.23355	5.2364	3.8196	5.05055	5.61491	5.8425	5.87739	6.44263	5.58022	3.39805	4.63311	4.43598	6.29894	2.98247
PF3D7_0113400.1	4.31655	8.18243	2.4726	4.42936	1.95242	8.52207	3.97483	6.78413	6.32421	4.32563	4.54003	5.83347	5.23684	3.42223	3.94086	4.99447	9.65464	4.92321	4.90079	4.05024	5.35218	6.92877	3.91164	3.75021	7.57718	4.53865	5.26125	3.56189	8.02234	4.12004	1.9133	4.28674
PF3D7_0113600.1	4.42446	4.40821	3.68194	4.28373	3.99434	10.4342	5.39053	6.53999	6.95164	5.68794	4.31476	6.40187	7.637	6.28349	4.52805	5.60511	2.99717	2.498	2.98214	5.5431	5.7946	6.99013	3.55534	5.2201	8.11039	6.08582	4.73112	4.6431	4.55611	3.23452	6.92895	2.03411
PF3D7_0113700.1	7.20967	7.58907	8.65654	7.28031	6.66595	7.78318	7.70746	7.48712	8.08859	7.59386	7.72362	6.81846	7.41653	7.26313	7.13848	7.47143	7.89716	7.90042	7.36739	7.51384	7.77219	7.90872	7.60704	7.27013	8.1515	7.57635	6.62591	7.97328	7.0618	6.88178	8.03012	7.60518
PF3D7_0113800.1	6.95474	7.70812	8.34387	7.33981	7.12989	6.04469	7.24825	7.93943	6.46479	5.95975	6.71525	5.90956	6.50767	3.581	7.0797	7.55265	8.88482	4.28835	4.9975	8.32443	6.56848	7.97893	6.14505	5.87474	8.6624	8.61794	8.02586	6.34162	7.68839	8.65204	9.44127	8.59833
PF3D7_0113900.1	7.08697	8.3507	8.78165	9.21762	7.96951	9.94329	10.0231	10.6996	9.78279	9.18367	7.98225	7.98333	10.013	7.62322	10.6155	8.71966	10.1231	8.39844	8.14369	8.58234	6.75309	7.96932	8.36053	9.84035	10.7421	9.5993	8.76399	8.57211	7.8485	7.74607	8.83982	10.0375
PF3D7_0114000.1	9.4233	9.83458	10.8278	10.2258	11.809	13.7813	11.5942	11.5528	12.1687	10.0819	9.39443	11.0342	11.5568	12.9272	9.94176	10.6758	10.7741	9.4654	10.2228	11.5731	11.4526	12.3181	9.84588	10.5156	12.0145	11.3663	12.4838	10.5128	10.2773	9.30975	11.0409	7.23237
PF3D7_0114300.1	-2.27071	-0.499656	-7.90316	-1.6201	-4.88435	0.516384	1.2802	0.537114	4.12034	-4.08928	-5.34937	-6.34453	-1.33855	0.862381	-0.964118	-4.55556	-5.00414	-4.55278	-2.67539	-4.43228	-3.60302	-2.26029	-4.61968	-3.82407	-0.0532347	-4.82923	0.935373	-4.99573	-6.56354	1.12646	-6.52709	-3.88865
PF3D7_0114500.1	9.40283	7.39374	14.1651	11.7264	13.5406	13.3303	10.0664	13.0219	8.43569	11.9744	10.0597	8.79621	10.7304	7.93856	9.92018	8.4783	4.57801	6.56894	4.20234	7.92343	9.61875	8.58021	5.59969	10.3819	11.321	12.7063	12.9545	8.19958	7.49834	10.5083	6.45089	10.2756
PF3D7_0114600.1	7.59255	6.19969	6.1642	10.7553	11.4295	5.32717	6.70759	10.9764	5.20263	6.23494	8.06977	6.17144	4.93384	7.51783	6.15625	7.85566	5.62374	4.11048	4.77411	4.72357	8.45022	7.2849	8.75751	3.61643	7.25815	8.35949	4.27238	8.64873	6.22659	9.89872	6.19418	7.59548
PF3D7_0114800.1	6.44158	5.73083	5.71046	4.61751	9.10245	4.8354	6.84551	11.2665	7.3776	5.73393	3.69749	5.64276	8.31786	6.49993	6.20823	4.02902	4.92959	7.95682	7.16735	4.17886	7.55041	7.98954	3.33491	3.21951	10.0793	7.43226	3.74849	3.82419	5.80934	10.338	5.47173	6.01029
PF3D7_0115000.1	1.71719	1.7386	5.28577	1.33648	0.0912013	1.88926	0.513814	-0.219452	-0.576838	-0.521642	-0.700639	0.847152	-1.1464	-0.985742	-0.948962	1.373	2.90363	-0.433363	-0.127235	1.48486	0.583526	1.72799	-2.81552	2.70726	2.32632	0.778824	2.9114	0.623476	-1.19706	0.681922	4.37795	-0.992948
PF3D7_0115500.1	8.20681	6.21321	6.84635	3.73586	5.56336	3.68118	6.56012	4.62354	7.27568	4.18468	7.51674	5.40716	3.56882	8.02136	6.6715	8.61769	10.7503	5.85673	7.60368	8.62412	4.97956	3.16781	7.8151	8.23746	2.42017	7.99749	9.29553	6.51649	7.14844	3.22146	5.22011	5.1844
PF3D7_0115600.1	5.99873	5.71214	6.06773	4.37715	10.125	3.98934	8.37045	5.31996	9.76777	7.25652	7.9883	6.11164	6.933	7.26558	6.17202	8.88819	4.12803	2.48281	6.76693	7.47627	7.15911	5.91468	9.40429	3.16516	5.47451	3.39141	9.50521	2.846	6.14911	3.20919	5.31149	5.09051
PF3D7_0115700.1	10.6389	14.9477	8.67755	10.7256	8.68014	9.49563	10.64	11.4282	7.21933	9.37711	11.3355	8.95829	9.73728	14.8912	8.30058	11.8641	12.648	10.8232	11.7032	11.5798	11.2766	10.4751	11.3811	10.2487	9.36386	10.2767	11.3521	11.5784	8.91406	7.57597	6.83339	6.66988
PF3D7_0200100.1	2.8152	6.57632	1.01544	7.69467	5.26309	1.07518	5.06781	5.17063	5.50377	5.31857	4.99959	-0.091485	2.08706	7.89408	6.67594	1.91092	6.32948	7.83735	8.34206	7.85035	4.1886	4.22985	5.53692	5.20224	3.19722	6.42407	7.32059	6.60765	7.14028	5.58874	4.67016	5.79191
PF3D7_0200300.1	2.48576	5.20798	5.45225	2.67935	9.70341	10.4196	9.58154	3.1543	8.77067	8.05986	2.87491	3.70279	9.93434	6.43243	6.7816	3.30919	4.26262	5.97841	5.91377	3.24535	7.30732	7.10407	6.60931	6.34335	5.31805	11.3365	8.49709	5.65074	11.4118	7.01318	4.66839	6.25836
PF3D7_0200500.1	4.2141	8.38335	1.15317	5.55884	5.87334	4.863	3.42735	5.54208	0.921816	4.37913	-1.53332	0.114914	2.53066	2.93324	1.12329	3.15056	-0.0304811	-1.55203	2.72358	-1.04966	3.43034	3.22134	5.00523	4.06859	2.9576	4.54925	-1.1134	3.43668	1.68609	-1.14085	0.431457	2.3022
PF3D7_0201400.1	10.1153	10.2974	10.2337	8.70069	14.0004	8.85651	12.821	9.65349	8.92081	10.7974	13.4313	10.3531	12.972	11.5642	10.2551	7.39924	8.77878	11.2234	7.82946	7.66772	11.3595	10.0846	6.40408	12.5349	10.4665	15.5305	7.46813	7.20554	9.97265	15.5274	9.99949	10.5258
PF3D7_0201500.1	5.95844	7.16264	4.65046	5.72503	7.23591	7.38651	4.97948	7.36239	5.64715	5.03854	6.63689	5.11078	5.11004	5.90684	4.9992	5.75931	6.97042	3.61691	3.19974	5.07612	5.7909	6.08235	4.76981	7.11549	5.58836	7.43345	6.67896	5.74771	5.66016	4.70806	6.56448	4.12645
PF3D7_0201600.1	10.5427	10.5858	11.2161	9.24824	10.2274	10.7588	9.84954	9.77071	9.30064	9.69304	10.5356	9.16219	9.62161	10.1246	9.20653	10.6185	9.59797	9.79493	10.0018	9.55281	10.5294	9.4073	10.3761	10.5698	9.06433	10.5645	9.74837	10.2562	10.0571	10.5084	9.78128	9.88367
PF3D7_0201700.1	5.27838	6.53276	5.58141	6.80644	7.6001	7.39431	7.58357	6.10156	6.29816	7.10023	5.72667	6.41523	7.25511	5.65919	7.14611	5.93487	6.39855	6.17073	6.28293	6.14868	6.05675	5.89998	6.33181	6.02524	7.76647	7.37151	6.15452	6.31387	7.81478	5.98901	6.40471	7.26598
PF3D7_0201800.1	10.3225	10.3837	9.82658	8.28522	8.94649	9.35365	8.22492	10.5397	9.40834	9.05194	10.4087	8.30663	8.79258	9.34331	9.04417	10.0051	9.82931	10.3275	9.76909	9.88988	10.0483	9.39225	10.294	10.1132	8.22231	9.74954	9.10909	10.3566	10.3661	10.011	10.0515	9.92433
PF3D7_0201900.1	15.014	14.6551	14.6189	15.1925	16.797	17.6653	14.6552	15.6592	12.5484	15.2386	15.0404	15.4552	16.1993	15.5244	14.8781	15.1323	13.737	12.4577	13.0129	14.6949	14.7343	14.1163	14.525	15.8018	14.6122	17.1489	16.1894	15.1006	15.0065	13.9283	13.9164	13.7701
PF3D7_0202000.1	18.2911	19.6477	18.7921	16.68	17.5826	19.5592	17.7414	16.1684	14.5157	16.9361	18.3644	17.8016	17.3457	19.3486	17.4589	18.3619	18.5411	18.4498	19.3236	19.2084	18.0273	17.363	18.9427	18.9875	16.277	19.7222	19.7351	19.1466	17.8997	18.8057	18.5182	16.9795
PF3D7_0202100.1	5.01707	4.49792	4.63209	4.09766	6.0498	6.15263	5.22143	4.16672	5.26964	4.67516	5.09715	5.66463	5.54048	7.45751	2.32758	5.44785	3.82759	3.31204	3.5576	3.68821	7.24025	6.93699	4.21488	3.77358	5.24745	4.79469	4.39219	5.18757	4.26221	3.79447	5.91456	0.776774
PF3D7_0202200.1	2.63675	4.59932	2.1504	5.11614	5.57855	5.35704	5.31603	4.5903	5.41712	4.785	3.47035	4.66278	5.2245	4.83847	6.78491	3.85103	5.26616	4.74353	4.8126	4.26008	2.18325	2.74024	5.10181	5.56072	5.29148	5.60754	4.22716	3.93666	3.62866	3.80934	4.31892	5.24422
PF3D7_0202300.1	2.96698	5.72204	-0.971205	5.60695	5.53221	5.22664	3.85923	4.93105	5.05662	4.64625	3.66665	4.06642	4.97005	6.17351	2.5605	3.69544	7.25406	2.89791	1.7608	2.56316	4.27889	4.97735	3.66357	3.84232	3.58368	5.69927	4.66029	-1.3467	6.93739	-1.82458	-1.37647	-0.197043
PF3D7_0202400.1	8.20399	10.5561	6.32162	7.99913	8.66135	8.29244	10.0106	8.87024	10.0488	8.61312	7.79245	8.76175	8.3119	9.57574	9.9925	9.02314	8.79565	9.03598	9.00437	9.62674	8.20448	8.64568	9.0985	8.8153	8.95864	10.3702	10.7593	9.37213	9.17661	9.04597	8.72853	8.90434
PF3D7_0202500.1	10.732	10.5202	9.75979	9.84385	9.36692	8.88624	11.2975	9.60256	11.2901	9.56013	11.028	9.55547	9.49929	10.5205	9.48645	10.2172	10.5172	10.3886	10.0327	9.87213	10.8483	10.1094	10.4572	10.0115	9.78364	8.90838	8.30888	11.2612	10.3116	9.90112	10.0298	10.36
PF3D7_0202600.1	9.97375	6.77761	13.8888	8.38214	9.34038	3.7042	8.38058	8.63183	9.6665	7.37685	9.38386	10.161	7.86073	7.4985	8.09228	9.76575	10.8611	10.0757	10.1	10.1924	9.81468	10.6965	8.53052	8.27146	8.33645	6.7542	9.57457	9.2003	8.08803	9.15761	10.8585	9.26992
PF3D7_0202600.2	12.3726	18.1916	18.6418	10.1259	14.6354	16.787	11.5242	10.9523	10.1086	14.1287	14.3626	11.5391	14.1272	16.8822	11.4578	14.7398	17.2082	15.9381	17.3512	16.9802	14.5281	13.4636	15.767	16.0483	14.3629	16.504	8.79346	14.1431	9.70177	16.2226	19.7827	10.9402
PF3D7_0202700.1	5.53246	4.57557	12.8207	4.98432	6.3803	7.78486	5.64668	5.24145	8.87306	7.11071	6.47642	5.65134	7.03886	3.63162	6.11979	6.64426	9.06511	6.69236	5.90292	7.19849	5.01287	4.56984	7.6048	7.62245	6.18662	5.38855	3.3458	2.76684	4.73275	2.90574	3.65401	7.72269
PF3D7_0203000.1	9.47448	11.4942	12.6238	8.38311	10.612	8.79624	11.0988	7.90949	9.15946	9.81034	8.40391	8.82597	9.35084	8.01135	8.43057	9.03653	11.8459	8.3772	8.98668	9.50879	10.4015	10.6618	8.80691	9.48078	9.03305	9.73182	11.5772	9.61494	10.346	11.2617	7.34281	10.1869
PF3D7_0203100.1	12.3709	11.606	12.083	14.3332	13.505	13.3033	15.8869	15.064	13.9947	14.5877	12.9702	10.6942	14.212	13.4571	14.7702	11.9513	13.0198	10.8294	12.2476	10.8207	11.9205	12.3379	13.2749	12.4118	13.6166	13.6455	14.6164	12.7142	12.4317	12.4958	10.1884	14.2157
PF3D7_0203200.1	9.80493	9.09997	10.2918	9.38372	8.6532	9.00286	9.17947	8.63168	8.38503	9.3578	9.99523	10.1135	8.69032	11.4984	7.52655	10.3384	10.1592	10.2518	10.2855	9.98042	10.9487	10.9534	9.05843	9.038	9.55151	8.5282	8.99483	9.88997	8.97079	8.52067	11.4593	6.50673
PF3D7_0203300.1	13.2864	12.4987	18.3751	11.0825	9.49708	11.58	14.2724	11.837	13.0972	14.0564	9.58972	12.3642	15.3496	13.1099	12.2268	15.3761	11.2192	15.2541	14.8318	15.5326	13.2613	12.9322	14.4822	14.3231	12.8154	13.6603	9.43325	12.5477	11.6552	9.24542	12.246	12.9894
PF3D7_0203400.1	6.01143	1.9709	8.8224	8.95802	7.06676	8.1957	8.23097	8.52792	6.95443	8.76151	7.58381	7.09503	9.47998	2.81433	6.96448	5.58349	8.73633	4.4409	3.9816	6.15253	6.79739	6.32198	6.61474	7.4005	6.96182	3.09215	2.48536	7.51699	10.952	5.53807	2.14849	10.4002
PF3D7_0203600.1	4.83547	6.77017	0.537207	4.54531	3.6517	3.24613	4.50947	4.7162	4.85891	4.51481	5.32579	5.33259	5.30247	7.65555	3.32132	4.54077	8.48907	4.23304	3.73049	5.57156	6.24393	6.13736	4.65281	2.42226	4.23357	4.57973	4.34466	5.23189	6.49927	5.89669	0.16377	2.50067
PF3D7_0203700.1	9.05175	10.2211	9.69374	9.75325	9.65767	10.5835	11.0909	9.85202	10.0563	10.4197	8.54241	9.99138	10.75	10.2541	9.49299	9.58398	10.0421	9.32075	10.1543	10.3005	10.1539	10.8744	9.88384	9.61559	10.6928	9.24992	9.32771	9.61948	9.99441	8.97357	8.99724	9.10871
PF3D7_0203800.1	16.4483	17.3859	21.9203	18.5537	17.4922	20.5811	19.39	20.0762	19.7784	18.7355	15.7028	19.3824	19.786	17.9408	19.4533	16.9077	21.1584	18.4294	19.3292	20.669	17.3005	21.1914	19.853	19.72	19.4612	18.7794	18.904	18.875	16.9736	13.8523	16.4854	18.3168
PF3D7_0203900.1	12.3007	12.7217	12.5353	11.0948	13.4645	14.5688	12.3861	12.0219	12.3346	12.8029	13.7492	12.6693	10.9662	13.5166	12.674	12.9751	10.7033	13.0205	12.1368	13.6882	12.5636	11.3726	12.4041	13.2013	10.93	12.2681	15.3073	11.1084	12.1329	16.3315	12.16	12.0124
PF3D7_0204000.1	11.7264	11.3757	11.2038	9.76692	11.5549	9.94177	12.0649	10.5552	10.8507	11.8876	11.5123	15.5201	12.4418	12.0095	11.7848	12.8479	9.62742	11.6944	11.6497	11.0102	11.8767	12.3076	10.255	11.7303	11.1455	11.6656	13.8447	10.6052	10.8634	13.8963	10.8275	10.7844
PF3D7_0204100.1	7.44999	9.80992	9.03162	8.5958	8.83298	8.39359	8.59957	8.20379	6.26179	7.13248	8.26764	8.04232	7.48685	6.89039	7.0063	8.35226	10.4397	7.56021	8.96361	8.03596	8.56023	8.51734	7.9891	8.11812	7.77783	7.08593	9.29349	7.37676	10.0738	8.85868	5.69118	8.33185
PF3D7_0204200.1	11.3015	13.1184	3.64374	12.1663	11.6432	12.8973	12.3872	13.5379	11.1731	11.6517	11.8451	14.0657	11.7099	13.8589	15.696	11.5107	13.0721	11.8124	12.6528	12.5832	8.29407	9.4154	13.0399	13.6012	11.8413	11.7245	12.2449	11.9478	10.8502	13.1682	12.2627	12.2962
PF3D7_0204300.1	10.6528	12.1045	10.8561	12.0887	11.2491	10.3208	12.6108	11.1643	10.7046	11.3902	10.3971	13.0224	11.7052	11.2772	12.0991	10.6595	11.016	11.4721	12.0023	11.4652	10.5543	9.78341	10.8133	10.676	11.2181	10.7059	12.0283	11.0701	11.3965	11.4496	3.82398	12.6879
PF3D7_0204400.1	12.2497	19.533	11.4644	14.4753	12.9403	14.1075	12.9615	9.11796	10.7354	12.6711	13.1646	10.4252	12.6638	14.4525	10.9733	10.236	16.4972	13.2278	14.2192	13.9256	12.2475	11.9783	15.5537	14.4962	12.454	12.8886	6.70973	11.6875	11.1135	6.26047	10.2933	11.6847
PF3D7_0204500.1	7.55393	5.63402	6.74547	8.2468	8.02888	9.08343	6.75696	8.57065	5.15282	7.08031	7.96646	9.53445	7.31304	8.65775	8.27916	8.68395	10.1518	8.95599	8.57576	7.04898	7.02495	8.92569	9.20899	8.22568	7.59827	6.53194	7.9658	8.36635	6.8679	9.26186	13.5775	6.19064
PF3D7_0204600.1	6.58088	3.68732	8.45292	6.00177	7.9544	8.01803	7.34963	8.02383	4.94418	7.47951	7.60943	7.57655	8.02656	10.2763	5.94607	8.342	3.82178	7.48224	6.96025	8.2283	8.66388	6.41893	6.95372	5.54309	5.56999	7.21949	8.69679	6.47074	7.44457	8.56851	3.60133	4.45835
PF3D7_0204700.1	4.28661	6.64259	7.93839	4.28272	4.69566	5.29015	3.5127	5.30313	4.06099	4.15883	6.00322	5.41526	4.54029	0.817413	3.67018	5.62796	7.12344	5.74889	5.05612	4.17583	6.26964	7.50095	6.39769	5.29048	4.31275	4.91513	4.69945	5.51536	8.21412	5.26476	5.70238	7.21589
PF3D7_0204800.1	9.83	11.4342	10.9013	9.05114	8.62432	10.4214	8.59852	9.48855	8.95603	9.44522	8.90591	10.8682	10.4539	6.31371	8.27812	9.0731	10.4491	9.0417	9.21476	9.56782	10.5572	10.8096	9.09833	8.81135	9.15545	6.64793	10.1917	9.17371	12.1567	10.64	4.35781	11.3048
PF3D7_0204900.1	10.5109	8.08621	8.03782	13.4099	10.0055	12.5125	12.7436	15.4344	13.3039	13.2655	11.8519	11.361	15.8888	16.5422	16.9211	10.8343	14.5709	12.3355	12.3905	12.8898	7.79539	9.95318	13.456	13.2495	10.6817	10.5593	15.1217	10.6473	7.8353	14.4665	7.4403	11.9946
PF3D7_0205000.1	12.4325	10.4205	10.5565	10.9896	7.57909	12.9013	10.5734	13.09	9.98889	10.5367	8.52379	10.5633	9.93542	10.5597	9.88384	11.3049	12.6717	8.62645	10.351	11.227	11.4224	14.9235	11.5485	10.3448	10.763	9.95975	12.5739	11.9471	11.1478	10.7218	13.4647	9.06955
PF3D7_0205100.1	10.8429	8.76013	13.1168	8.1869	9.51846	8.12026	11.7014	12.754	11.5989	10.5678	9.52361	11.1575	10.857	6.83222	11.1854	11.6251	7.21534	8.6562	8.56644	9.39993	9.11032	9.78971	10.84	9.71768	10.3063	8.7096	11.0581	9.47141	8.10611	6.40777	7.61834	12.4081
PF3D7_0205200.1	7.27265	5.84718	5.77902	9.12216	3.84939	10.7866	7.12409	3.99352	4.21028	5.99971	4.35598	4.3006	8.74705	6.3206	6.50044	5.09494	5.09808	6.65677	4.76876	4.59175	6.25394	5.87382	8.34769	2.35322	7.14692	3.3697	9.57394	10.487	6.06232	3.69758	5.27087	6.81447
PF3D7_0205400.1	3.35768	2.49573	3.78419	3.60024	3.43371	3.1631	2.15805	4.09442	4.10508	4.09343	3.60177	4.78348	3.67418	2.94314	4.00136	3.70198	2.94212	3.5838	2.39796	2.55669	2.95484	3.05568	3.78047	3.44623	2.9621	3.52427	2.96673	3.4826	2.4319	3.53209	1.58538	4.18681
PF3D7_0205500.1	6.78779	11.2266	5.21812	7.71282	6.3477	9.09739	6.26728	8.3064	7.95054	6.85411	7.81636	8.59002	6.62053	7.88391	6.82313	6.54565	9.06121	7.82364	6.19228	7.33717	7.52089	8.62719	7.89589	6.23308	7.9403	5.97677	6.5402	6.93809	5.39169	10.1744	3.39471	7.22855
PF3D7_0205600.1	5.39194	7.77056	2.9939	5.51498	4.65627	6.32782	4.61642	5.59113	5.52664	4.43043	6.70715	5.58335	5.44771	4.61713	2.5159	6.07807	1.24942	4.77868	5.0608	4.7462	8.53161	7.82172	4.42275	5.63849	5.15844	4.93223	3.01564	4.64648	9.39319	6.2153	6.10922	4.57495
PF3D7_0205700.1	7.16856	11.6578	3.0156	7.62319	7.26033	8.60418	6.47193	7.92706	6.24727	6.50266	6.81093	9.62986	6.50132	5.10798	5.88409	8.24413	2.04687	7.47343	8.01161	8.25275	8.61034	9.67679	8.34018	6.92518	9.22747	6.24624	6.02744	7.08503	10.3895	-0.563552	11.4294	6.23945
PF3D7_0205700.2	0.997435	1.45135	7.88636	4.48635	7.80115	8.43335	7.40658	4.04099	5.24475	6.43709	6.02256	-2.68041	3.82348	8.59924	1.13774	1.79501	7.82527	5.82912	5.23509	6.00356	6.10943	4.46875	4.43574	5.01958	5.50349	-1.75654	-2.97978	0.93649	1.87466	8.42772	9.11921	0.398865
PF3D7_0205800.1	7.07245	8.78273	9.03029	7.00303	7.8597	5.97115	7.50095	8.9725	7.10264	6.64899	7.82629	8.92359	8.1867	4.39451	7.42182	8.46708	3.20692	8.8203	7.7979	8.60469	8.65776	9.30886	7.2424	8.42463	7.92501	6.24591	7.63068	8.15632	8.82328	8.48993	9.85973	9.83621
PF3D7_0205900.1	7.69219	8.69289	9.16506	8.50402	7.87314	8.35711	8.22876	7.66521	7.33853	8.0962	8.02391	8.54535	7.55022	7.16045	8.60564	8.06174	8.32101	8.63638	9.00835	8.22316	7.39305	7.64853	8.50144	8.96891	8.13916	8.13496	7.8812	8.19341	7.65459	8.251	7.97152	9.29249
PF3D7_0206000.1	6.13425	5.63847	8.12083	7.20948	7.15702	6.54481	8.14164	7.49398	6.72079	7.26739	5.51297	5.75452	6.93342	5.66932	7.9475	6.20285	7.85408	7.4747	7.36532	7.74643	5.70351	6.30026	7.25855	7.02708	7.16958	6.259	6.75463	5.98393	7.02879	6.86621	6.71231	8.29187
PF3D7_0206100.1	3.04511	4.73592	3.89225	4.52817	3.71119	3.36085	4.56545	3.96916	4.22139	3.64188	4.00236	2.13018	3.04951	2.0151	2.92239	3.7168	3.905	3.39786	2.44044	3.32444	3.98961	3.97286	4.63241	2.98583	4.0876	2.24618	1.78612	3.58339	4.17484	2.23808	3.60193	4.72344
PF3D7_0206200.1	4.55244	2.36517	9.57411	6.57415	4.61277	6.23095	3.95672	7.35394	6.3483	4.20696	5.15583	4.62597	6.16052	4.12045	4.14904	6.21869	1.7999	3.32632	4.60756	4.5711	5.46064	5.89149	5.55586	3.27691	5.80507	4.73184	6.69562	3.18275	3.16796	0.239913	1.97352	4.24883
PF3D7_0206300.1	8.128	8.49119	6.98611	8.11995	9.26112	10.9923	9.13657	11.3575	11.1982	9.25391	7.79725	8.05336	10.2707	9.38982	9.21941	8.40158	7.37497	8.47389	7.97569	8.75828	8.69251	8.91718	7.4263	8.25016	11.129	8.87086	8.98812	7.23605	8.7139	7.62129	8.94204	7.54058
PF3D7_0206500.1	6.94965	6.56081	5.87361	6.32451	6.8464	7.1334	6.25446	7.39316	7.22012	6.31118	6.66295	7.81694	7.74087	7.0991	7.35232	6.58793	6.82843	6.65984	6.22919	6.67882	6.21391	6.84914	7.15452	6.57242	7.2303	7.40806	5.76154	6.20262	5.50458	6.48432	6.76238	6.53221
PF3D7_0206600.1	2.20899	4.07262	3.72671	1.55874	2.68938	1.65996	3.60421	2.76908	4.09813	3.10166	3.58169	5.54206	3.02712	2.09208	2.7274	2.08767	-0.604557	2.90442	1.09411	2.08515	2.57406	1.63979	-0.5671	4.4925	4.42012	3.54962	-0.836129	2.60698	-0.524777	3.76281	-0.445563	3.7415
PF3D7_0206700.1	4.36575	5.19152	3.62751	5.63054	6.17672	6.66363	5.32251	4.52241	4.72646	4.97858	4.03573	5.4553	4.97138	6.24665	5.20837	5.46905	5.09408	5.30213	6.10693	5.44163	4.54238	4.92968	6.03511	5.92961	5.41591	5.933	4.84362	4.10846	5.45333	1.79822	7.33465	3.24061
PF3D7_0206800.1	4.93112	5.08378	4.4808	6.85058	6.83487	6.69453	6.9923	5.76445	6.28054	6.34606	5.68084	7.02964	6.78973	5.74134	8.1145	5.45195	6.01554	5.56358	6.35867	5.06792	4.2407	5.04833	7.01926	6.9535	5.99865	7.14688	6.12825	5.44361	5.85525	5.46468	5.55868	7.2893
PF3D7_0206900.1	3.54018	1.8115	2.38885	4.91418	3.80081	-0.0925543	3.67218	-0.32931	4.16444	3.08735	-0.0510633	0.214646	4.73752	3.21324	3.16573	1.94405e-05	0.603132	3.75016	-0.322017	7.23966	2.44571	1.24539	-0.201851	-0.668693	4.42968	3.46317	4.85657	-0.0715852	2.98147	-0.16804	1.00887	2.16823
PF3D7_0207000.1	10.25	8.87955	8.91866	6.44691	7.98572	10.5152	9.502	10.8898	11.1213	8.68526	8.78386	7.50098	10.6469	9.65239	10.0527	10.6622	7.33567	8.74252	8.37466	11.9114	9.45388	10.3183	10.5963	9.59906	8.54965	8.38016	11.7746	9.83202	8.83841	11.0795	13.8158	8.96833
PF3D7_0207100.1	11.295	11.6398	11.3943	10.4117	14.1659	15.6183	11.9945	13.7532	11.6936	12.3282	11.3288	13.6292	12.6899	11.9148	11.974	12.2046	9.78933	8.86607	9.91464	11.9785	11.7676	12.4012	11.8788	12.0311	12.3399	12.618	13.5371	10.811	11.0392	11.3901	11.0351	10.3784
PF3D7_0207200.1	8.00743	11.2735	4.56189	5.24326	7.82977	6.01402	9.32278	10.5188	10.0873	9.3139	10.246	6.09393	6.18557	7.03209	6.89577	6.96987	10.5963	6.41862	7.34477	5.43446	8.93954	8.97567	8.38922	9.32546	6.8686	8.55256	4.89214	8.40304	11.2541	4.19883	5.48633	8.59688
PF3D7_0207700.1	-0.580193	-2.83379	2.0018	-1.12706	-3.54647	1.7753	-1.3884	-0.00873516	-1.69698	-1.91736	-0.136692	-3.04766	-0.794118	-1.77833	-2.43439	-1.4832	2.72102	-1.04619	-2.84561	-2.99468	-0.764478	-0.604561	-2.3511	-2.45809	-0.786809	-3.57951	1.53323	-0.515743	-1.53149	-0.271314	-2.99189	-1.9096
PF3D7_0208000.1	4.32606	0.801094	6.61192	6.6934	2.29643	6.39419	4.65942	4.9961	3.85159	4.1656	5.53575	4.08059	3.87652	-0.0323885	6.78301	2.89356	6.466	4.02949	3.97424	4.54975	2.0918	4.59648	4.97985	6.53057	4.08609	4.32632	6.6968	5.08709	6.74263	1.08437	6.73804	8.02874
PF3D7_0208100.1	11.4175	9.67574	16.0001	10.4349	10.655	10.2684	11.3728	11.0126	11.2094	10.7017	10.7635	9.83772	9.97276	10.6091	8.47144	11.0881	12.6894	10.3718	9.97712	10.014	12.5738	12.3382	9.89688	9.96794	10.5209	10.1811	10.9774	10.9401	10.1273	11.1315	8.59664	9.79415
PF3D7_0208200.1	6.86718	7.57495	6.55408	7.11295	7.03713	7.09139	6.85923	7.13408	7.19429	7.46955	6.96785	7.9757	7.45425	7.01439	6.88413	6.9184	6.76993	7.08933	7.0343	7.08911	7.27332	7.29112	6.90426	6.86165	7.66759	6.72187	5.79569	7.05973	7.02026	6.67617	6.2055	7.06849
PF3D7_0208300.1	6.78568	0.842597	6.43845	6.18965	6.14419	6.18448	5.79636	7.33473	6.88878	6.48785	6.93556	7.87407	7.48404	7.34237	7.52079	5.93906	5.55916	7.01031	6.20179	6.99188	6.17434	6.4879	6.19366	5.67537	6.03753	6.81325	6.13073	5.8936	6.84716	6.66432	7.30841	5.94339
PF3D7_0208400.1	9.19663	8.90639	9.59869	8.07715	7.34074	7.66119	8.99726	7.36785	7.8346	7.54695	9.22361	6.9711	7.2104	8.48896	8.1813	8.55092	10.4397	10.0516	10.0368	10.0991	8.81727	8.36843	9.12267	8.69708	7.60578	8.14702	8.95515	8.99955	9.8985	9.09039	10.0746	8.9949
PF3D7_0208500.1	7.12731	4.7103	4.9811	3.40986	5.25032	3.38749	5.58436	4.20204	3.76918	4.52841	7.05923	4.90487	3.3747	6.33494	4.6876	5.41177	3.62965	6.49405	6.75452	7.41112	6.1747	5.67331	6.69991	7.70835	2.16273	2.69459	2.90237	6.83093	5.21572	7.73293	11.442	5.14835
PF3D7_0208600.1	10.3112	8.63236	9.35272	12.4202	9.28396	12.3822	9.99728	6.79952	9.82526	9.8585	11.2295	11.7045	9.41866	9.20046	9.48186	10.0171	9.69656	9.51403	9.5416	7.69402	10.4639	11.4946	11.2007	9.78346	9.87397	7.02349	8.59807	10.0467	9.70568	12.5429	14.2407	10.26
PF3D7_0208700.1	9.64932	15.1074	16.4156	9.05271	6.63064	10.7623	6.74033	7.51667	6.65178	6.96403	10.1951	3.07513	5.75121	8.57609	3.83181	10.0421	11.1052	11.1965	10.6752	10.7828	12.2205	11.972	9.78174	9.29364	8.86369	7.50428	7.8323	9.91744	6.64685	12.1861	14.3595	7.54845
PF3D7_0208800.1	11.6674	10.411	11.2199	10.5731	9.00624	12.054	10.8943	12.0176	10.1252	10.1892	13.6533	8.56921	8.44163	12.834	9.77858	11.6394	13.4495	12.8833	11.8941	12.801	12.435	13.0293	12.4956	9.75103	10.6738	9.53715	12.0161	11.5938	11.5633	12.4183	16.5834	9.10656
PF3D7_0208900.1	8.49294	7.52916	10.7401	7.88543	7.56711	10.1446	8.37971	6.97346	7.67264	8.00508	5.26988	7.49311	7.6645	8.22791	7.5619	9.1863	6.34956	7.93671	8.82658	6.98472	8.1925	7.4478	8.31091	7.6014	7.87973	9.47469	9.91605	8.39455	7.48453	7.86738	7.15088	7.40333
PF3D7_0209000.1	8.11799	9.88309	12.7349	9.81948	8.88517	8.61655	8.64614	9.21466	9.35878	8.97772	8.49985	5.53292	10.0843	6.70526	9.46451	8.53877	8.23596	8.18287	8.814	11.054	8.30758	9.14693	9.17466	9.076	9.62666	8.35864	10.167	8.24591	7.14124	10.5839	10.3511	11.2399
PF3D7_0209100.1	4.17908	5.37279	-1.17162	6.33615	6.01827	6.80659	5.7583	6.18306	5.72431	6.18139	3.57643	6.8473	5.8943	5.38575	8.22319	4.50678	4.30316	4.71128	4.40017	4.95425	2.48024	3.80272	6.13755	6.69699	5.67475	6.24189	4.90039	4.53632	5.76818	2.90941	5.89939	5.74315
PF3D7_0209200.1	7.04875	8.2377	10.9075	6.52481	7.55444	8.71798	5.21362	6.98067	4.2908	4.90919	7.46025	6.22657	5.2898	3.97741	4.22682	7.38512	10.2145	7.82064	6.87253	7.79414	7.71624	8.62112	7.18067	7.35252	7.21862	5.13049	6.74899	5.69179	8.03161	3.88976	10.8134	5.67008
PF3D7_0209300.1	9.37766	8.01822	8.91207	10.4639	11.2562	9.22815	8.78918	10.6695	8.6054	9.16985	9.06458	11.7262	8.09428	10.4267	7.41671	9.74025	4.4813	9.23751	7.9189	8.28314	11.4037	11.2954	8.43791	7.06648	8.77301	8.99534	10.8816	6.94145	9.43058	8.91405	6.51278	6.60293
PF3D7_0209400.1	4.31565	5.38516	5.80702	7.76937	6.42837	7.04513	5.71684	5.76854	4.28846	5.61688	6.80268	3.05661	5.40091	5.46215	4.13125	6.04891	2.7445	5.67806	4.36386	4.76901	7.24066	5.29051	5.7402	4.93775	4.9118	5.29934	5.8007	6.4973	8.05744	6.49176	5.20156	5.77865
PF3D7_0209500.1	9.28427	7.18195	7.44643	9.71	10.4271	5.80645	13.0184	11.1665	11.5907	11.7273	7.51773	7.61235	11.3157	10.3564	12.3642	9.38921	6.12327	5.4309	8.4852	9.07699	7.45833	7.97744	9.63876	8.1329	10.0975	11.4405	12.5353	9.17886	7.69759	4.56365	7.42792	10.0167
PF3D7_0209600.1	4.9236	5.12062	6.62374	4.69666	5.68136	4.72905	5.17077	5.00256	4.72355	5.07394	4.77173	4.66955	5.22722	3.66602	5.84892	6.19426	5.35643	4.96495	5.10903	4.73464	4.34436	4.67601	5.00941	6.32683	4.97178	6.41358	7.30876	5.08158	5.29566	5.02507	7.53718	5.91164
PF3D7_0209700.1	6.64257	6.86803	5.23485	6.06892	6.43631	6.67858	6.56035	6.22972	6.5046	6.17211	6.51848	6.75107	6.52294	6.81297	6.14081	6.42731	7.02625	6.69867	6.32812	6.25286	6.6279	6.71312	7.0808	6.48931	6.09689	6.0651	5.34005	6.09385	6.87031	6.07584	6.61222	5.96778
PF3D7_0209800.1	7.86964	7.87519	7.63576	8.26309	8.39408	8.37003	8.10802	8.18545	8.33815	8.6854	7.61753	8.58014	8.49333	8.70779	8.35233	8.17021	7.12658	7.94856	7.97309	7.66055	7.82919	7.81603	8.23887	8.11468	8.31469	8.01741	7.55062	7.92758	7.00478	7.8213	7.69845	7.74651
PF3D7_0209900.1	12.2615	9.38814	18.3746	14.7377	13.8465	14.3872	13.9095	13.4084	13.8211	13.3118	13.7093	12.4927	13.3826	12.0303	8.50343	13.6794	7.88916	12.5884	12.5276	11.7157	18.5543	16.9523	12.3082	12.1149	11.1802	11.2117	12.2187	12.2906	18.8059	13.604	8.97882	12.2375
PF3D7_0210000.1	11.0164	13.7634	14.1104	10.79	10.6313	11.2114	10.2551	11.5321	9.42428	9.97274	11.6828	8.55574	9.72038	5.6425	10.8397	10.287	11.5325	11.305	10.9885	11.5522	10.7617	11.5782	12.3533	11.6369	10.4903	9.68492	11.0734	11.7036	12.3352	11.9528	12.7971	15.2802
PF3D7_0210100.1	8.80603	9.66109	9.00234	8.80078	9.2079	8.69828	9.71292	9.26412	10.1791	9.14574	8.07405	9.00915	9.02739	9.70522	9.15517	8.36017	9.46576	9.26825	9.54678	9.12812	8.90513	9.22898	9.33054	9.02603	9.03973	7.92354	8.05477	8.89247	7.68453	10.0227	7.18571	9.13002
PF3D7_0210200.1	4.27874	7.27097	5.3599	4.97467	4.70233	4.34494	5.32816	4.35578	5.42308	4.44488	5.1691	2.85015	4.50252	4.10259	3.88411	4.32985	5.75967	4.99975	4.86696	4.86887	5.58685	5.80384	4.99749	4.94837	4.57483	2.53547	5.37564	5.84469	5.02499	5.632	5.05588	5.39652
PF3D7_0210300.1	10.4818	8.85075	14.714	12.868	10.873	12.962	11.7684	9.83007	11.8937	10.9419	11.2948	10.6266	12.1965	11.7933	10.3756	10.7702	7.7382	12.7088	12.2002	10.8972	11.6186	9.77726	11.1657	11.9116	11.1688	8.13483	8.06061	10.9375	9.22348	11.084	9.34786	11.4707
PF3D7_0210400.1	4.62392	0.390077	6.30878	1.24215	4.61714	1.08029	2.62994	0.86588	4.8693	3.37737	0.343518	0.93485	1.22783	-1.00349	2.17535	0.822195	0.830789	4.74981	4.72731	0.795636	4.16142	2.73243	5.14033	0.681807	-0.171078	1.05247	0.328935	0.579452	6.52337	4.81215	0.225	6.76995
PF3D7_0210500.1	4.47066	2.16545	6.49127	4.39692	3.62912	3.34592	4.31877	1.58401	2.34317	3.53895	3.16917	1.94737	1.23368	1.43073	4.75968	3.49481	5.4849	4.98996	3.7811	4.17947	2.78576	3.39792	5.12088	0.494457	5.15086	4.89242	4.65012	3.33816	2.82884	6.47679	9.46101	5.92109
PF3D7_0210600.1	14.0974	14.6104	13.9641	12.3232	14.939	13.6246	15.2355	12.6417	12.463	14.4567	15.9261	16.4517	15.7434	14.3204	15.1719	13.2328	13.1975	12.8422	14.0439	16.2816	14.1835	14.7176	14.4393	14.1641	13.455	13.3155	16.4231	15.4532	13.4856	16.2775	13.8911	15.0636
PF3D7_0210700.1	9.87765	8.78264	16.9801	10.5217	10.022	13.1107	10.3896	7.09793	10.8708	9.96643	12.0087	11.779	12.2103	9.57045	9.63141	11.2029	8.05155	10.0714	9.08812	10.6484	10.7552	9.45994	10.2098	11.1005	10.5901	11.3545	11.9919	10.9931	8.43414	5.9811	8.46865	10.3046
PF3D7_0210800.1	4.77111	5.23081	6.18889	3.67074	4.33769	4.53807	2.67085	4.01199	4.08148	3.94407	5.17375	3.82799	3.60471	3.67251	2.3795	4.85097	4.39838	5.0383	4.01381	4.96911	6.19221	5.32852	4.13521	3.53773	4.31782	4.17438	3.38472	4.93414	5.51011	5.08033	5.43534	3.93872
PF3D7_0210900.1	7.37717	7.32473	7.68112	7.37633	7.18346	7.47055	7.24447	7.19813	7.6775	8.14677	6.90158	7.77618	7.39879	6.78579	7.07666	7.74591	6.6888	6.96866	7.13617	6.76422	7.47101	7.47941	7.31853	7.13791	7.88736	7.00096	6.3493	7.07139	7.05532	6.77619	7.43525	7.42169
PF3D7_0211000.1	7.55367	3.57762	4.61049	7.9955	7.34153	1.33153	6.12855	9.18437	9.01373	8.02822	8.87095	8.51906	8.21033	8.25426	7.53539	7.93027	8.12888	6.82654	6.70783	5.10487	6.74901	7.7091	8.01822	6.75342	7.63842	7.1809	1.30692	6.84662	5.85937	1.25599	9.9238	6.03358
PF3D7_0211100.1	8.69492	8.49888	8.65936	7.88461	9.26743	10.3157	8.92516	8.63039	10.2596	9.35464	9.74787	9.28124	7.50185	8.37424	10.0034	7.75782	5.8953	9.85306	9.59004	7.92315	8.4943	7.14094	9.56988	9.31201	8.46241	10.2063	6.04575	8.5234	8.45752	11.8562	7.44826	11.377
PF3D7_0211200.1	4.93296	1.85132	1.9466	0.397495	4.64714	0.870144	5.10302	4.75852	4.58002	4.1229	5.26466	7.15446	3.78586	8.61712	4.81028	5.90569	1.39466	6.08664	4.58092	6.35276	4.98703	4.54961	4.24143	4.10227	2.62572	3.66554	5.50073	5.44426	2.22271	6.2503	7.45509	1.22413
PF3D7_0211300.1	4.1105	2.06275	2.27533	0.97815	3.00803	1.22318	2.59684	6.43649	3.12321	2.2625	0.635526	1.87087	3.75793	3.17568	2.365	0.814963	7.76194	3.54752	0.935095	0.992322	3.78478	4.7096	0.863479	0.697478	4.05437	3.12713	0.607922	5.6043	2.75434	8.15829	1.83982	2.76403
PF3D7_0211700.1	8.83562	11.8922	6.1159	7.30087	8.04295	9.70597	6.69027	8.60376	6.83151	7.58419	8.79245	6.46968	6.05182	8.70831	7.4968	8.43125	9.45838	7.36757	8.35577	7.36096	7.82772	7.61489	8.62044	7.99525	7.58072	7.34444	10.2885	8.69014	6.91153	9.40796	9.24996	7.08146
PF3D7_0211800.1	7.49773	8.76128	7.9368	7.96675	7.01571	8.18585	7.27716	7.50576	6.31479	6.87755	7.97753	7.25792	6.88129	8.23249	7.66016	7.82257	7.62401	8.6645	8.53372	7.96264	7.25389	7.08186	8.53623	8.39605	7.06506	7.39551	6.96652	8.44111	6.20537	8.97326	8.09312	7.88673
PF3D7_0211900.1	8.36592	5.75937	12.1482	6.7938	7.59549	3.73298	7.62959	7.75752	7.43399	6.4023	8.83034	9.18694	6.03139	7.41297	5.67275	8.25903	4.06654	8.7693	8.03287	9.39105	10.5648	11.4372	7.20273	6.56044	7.07298	7.18066	7.55508	9.15409	6.77856	8.40708	11.0716	6.95931
PF3D7_0212000.1	4.18389	0.726824	8.51628	5.51596	3.58466	4.44104	5.09703	6.14935	6.02534	5.53268	6.09719	5.53713	3.37637	1.55493	6.80668	4.78242	4.61029	4.15026	2.32946	3.01241	3.21406	5.60376	5.61155	4.7543	4.33598	5.12008	6.98033	5.43558	2.46482	5.72544	5.67175	7.90564
PF3D7_0212100.1	6.59411	6.91087	6.16032	6.4404	6.15382	6.7601	7.48596	7.15982	6.72608	6.82676	5.92598	6.66326	7.46624	6.65081	7.45883	6.45094	6.50271	6.56573	7.37204	7.0483	6.12807	6.43315	6.53994	6.93935	7.31381	6.78536	6.69414	6.78485	6.61257	6.59127	6.27172	7.2178
PF3D7_0212200.1	4.2715	-1.0638	-0.648559	6.14772	4.56355	4.02799	5.00569	7.09621	5.52496	5.00783	4.32117	7.69192	5.21819	6.07816	7.92975	4.39881	6.37773	4.77774	4.32414	4.487	2.0537	2.33691	4.8681	4.89695	5.71953	5.74859	-1.03912	4.48454	5.03754	6.34372	5.18009	5.52446
PF3D7_0212300.1	6.1723	8.6051	5.98507	7.61995	7.06826	7.62578	6.80014	5.98912	5.4268	5.79572	6.77055	4.13805	5.51964	6.19926	4.21232	6.665	5.0486	6.27354	6.49625	5.58257	8.3184	6.75181	7.30099	6.53593	5.25802	5.81053	4.94557	6.79325	9.25052	6.37694	5.60992	6.32823
PF3D7_0212400.1	4.72597	3.65692	4.43399	3.78716	4.43247	3.93948	4.21196	4.88904	4.56377	4.69176	4.05508	4.73875	5.63266	4.21298	5.09759	4.09948	4.48202	4.59567	4.04525	4.65876	3.99188	4.38075	4.13988	4.29065	4.82591	4.96668	4.06284	3.88548	3.99045	4.63175	4.71162	4.74459
PF3D7_0212500.1	7.0697	6.87272	6.86039	6.41371	6.50374	6.23939	7.22296	6.70443	6.36812	7.24289	6.86475	6.81286	7.66781	6.56364	7.1134	6.88619	6.77691	6.80069	6.90779	7.20178	6.78005	6.98393	6.54734	6.77858	7.20643	6.88449	7.30236	6.77661	7.05671	6.60568	7.61867	7.07199
PF3D7_0212600.1	5.44948	10.2963	11.0588	4.86252	4.84327	2.50133	6.39693	1.95471	6.34132	6.71447	2.64263	2.42935	7.34179	5.94017	2.84314	6.65976	7.92801	5.79991	7.43576	6.73488	8.01567	7.76135	5.03696	5.28091	5.34146	5.88645	7.25137	5.51815	5.53312	7.39515	3.238	5.04408
PF3D7_0212700.1	12.6088	17.0586	11.0455	12.2472	11.1991	14.9307	11.7246	14.2727	10.2503	11.9482	13.1022	10.5065	11.9867	11.2371	12.8186	12.6877	14.487	12.978	13.0388	13.4466	10.8925	11.0618	15.0116	14.4342	13.3579	11.7751	6.93002	12.7956	10.6509	12.9584	14.948	14.3947
PF3D7_0212800.1	7.45494	6.70938	6.90347	5.26826	7.0055	9.21468	6.4463	6.07932	6.08956	6.36761	8.74211	9.6496	7.1476	8.01905	6.96595	7.4668	5.25044	7.77817	8.53	7.18156	7.70178	6.49845	7.3993	6.00476	6.89332	5.82537	8.53761	7.48317	6.9653	8.50494	6.2974	6.4741
PF3D7_0212900.1	8.87746	8.45544	8.26359	6.92886	6.01792	10.7266	9.7232	7.31169	8.78181	6.967	9.72565	11.6245	8.56602	8.77273	8.89269	8.83157	7.29539	8.78888	8.36943	9.10627	8.82152	9.47538	8.06268	8.74332	8.28208	7.69874	11.3114	9.65141	8.25423	10.7721	7.91166	8.46788
PF3D7_0213000.1	11.2972	16.0606	9.961	8.98154	11.5028	9.57697	11.0188	9.48305	12.9281	10.7683	8.00515	9.90364	10.8118	10.6816	10.3561	11.6613	9.27955	10.7547	12.0677	11.1856	11.003	10.644	11.1895	11.1307	10.618	9.87972	11.9398	9.9273	9.76265	11.0108	9.99145	10.7454
PF3D7_0213100.1	8.10496	8.64428	8.33656	9.36092	8.68566	8.61427	8.78033	7.31681	7.0737	8.4977	8.16516	7.74735	8.49638	9.39121	7.43445	8.28018	6.15549	7.46724	7.597	7.79909	8.65009	7.74871	8.52761	8.22698	7.51293	8.06336	7.94766	8.58827	7.21265	7.35373	6.61316	7.41269
PF3D7_0213200.1	7.4937	2.55474	8.20716	7.06777	6.94835	3.43334	6.2806	10.0028	7.1523	6.13224	5.62377	8.9179	3.56119	5.23272	7.40807	5.59861	3.66384	6.81807	6.8198	9.14395	5.3488	6.45534	8.30491	2.80536	7.44953	3.25827	3.59855	4.94166	2.8467	1.92001	3.89278	7.42779
PF3D7_0213300.1	6.95644	6.83412	7.09949	5.38246	8.29279	10.4696	7.85591	6.49259	5.70329	7.17766	10.023	7.34271	8.60967	8.90435	6.49877	7.3638	5.49453	8.11295	4.24278	8.56943	8.48093	6.4713	9.85388	9.29288	3.50592	4.48382	4.8312	9.62029	7.11677	11.377	6.72698	7.46105
PF3D7_0213400.1	7.12935	9.3861	9.27825	7.44252	6.17455	1.99076	5.10917	7.06294	3.73883	5.1255	7.78915	5.77072	5.96085	2.80464	4.87597	6.59565	2.30209	5.10425	5.54845	5.56612	6.36323	5.60212	5.03689	4.86319	5.99196	1.41177	8.39785	6.35656	2.94853	4.61187	2.40711	8.30532
PF3D7_0213500.1	6.59076	10.7575	5.28058	10.0222	6.09934	5.82976	6.56231	8.30096	6.21596	6.56334	6.17573	3.08673	7.89154	5.60982	7.55556	6.2238	2.65328	6.86779	6.59317	6.38225	5.95934	5.6811	8.28256	6.90089	6.07252	5.66854	6.72169	6.19067	5.42502	7.15409	3.50048	9.88145
PF3D7_0213600.1	8.92927	10.0633	4.73991	7.33581	6.72863	6.84856	6.47069	8.43421	7.31554	6.62447	8.61708	9.71501	6.40023	5.85162	7.79747	8.37628	8.47806	6.75573	8.0464	7.8556	7.48234	7.67368	6.34577	8.42245	8.0379	7.66992	8.6536	8.0952	10.1928	6.99282	8.05858	8.37282
PF3D7_0213700.1	9.5088	11.4726	12.2306	9.33733	9.58349	3.4443	7.80157	9.86617	8.04387	7.71076	11.3258	3.60944	8.47395	10.091	5.47276	10.6438	11.0896	10.3752	10.042	9.40286	12.1569	9.59114	9.40326	7.78249	7.62773	8.09618	7.42254	10.9675	10.0503	9.36319	9.64342	8.30129
PF3D7_0213800.1	11.7622	15.8979	10.0043	11.7308	12.644	12.5396	11.2726	16.5704	13.3927	12.2054	11.1984	11.1056	14.5896	13.2099	14.772	12.7621	16.0857	12.5063	13.6099	13.209	9.80697	10.9381	13.8417	13.3488	13.773	12.8355	12.9576	12.2908	10.0518	10.7312	10.452	12.9659
PF3D7_0213900.1	5.62369	6.43061	4.87196	5.93474	7.02272	6.6885	7.29904	6.35441	7.34129	7.44384	4.85813	6.2707	7.13411	6.77588	6.24785	5.70821	5.17398	5.52871	5.65015	6.24576	6.45913	6.6434	5.54509	5.86211	7.12577	6.44882	6.32486	5.42819	6.72243	4.9497	5.31867	5.34978
PF3D7_0214000.1	5.22853	5.88797	3.49052	6.59641	6.36828	6.31339	5.5848	6.01196	5.81398	6.80894	5.55177	6.96503	6.23027	5.79282	6.97086	5.57575	6.3709	5.87644	5.85727	5.53501	4.92367	5.6026	6.20985	6.15939	6.39496	5.94254	5.72742	5.69785	6.36293	4.81486	6.39018	6.06072
PF3D7_0214100.1	6.56606	6.85317	6.47226	6.05541	6.33997	7.15694	6.30975	6.19204	6.22334	7.02351	6.69641	7.23333	6.93183	6.54097	6.97464	6.64028	6.73915	7.25793	7.39622	7.27898	6.55161	6.76858	6.9899	6.87345	6.73003	7.16264	6.83281	6.47895	7.33923	6.27606	7.38779	6.77186
PF3D7_0214200.1	6.24303	4.01021	4.8297	7.49055	5.03311	6.21598	4.36816	5.79903	5.73256	5.44511	6.1684	5.84024	4.52483	6.3889	6.16636	8.18451	2.34056	6.26761	6.48	6.78598	5.75171	6.0412	6.38162	6.12635	5.47025	4.77215	6.76089	4.64993	5.10788	8.8758	12.4691	5.05272
PF3D7_0214300.1	5.34024	4.18582	2.22974	6.29431	3.57028	3.42877	4.64993	5.01918	5.2217	5.213	4.7136	5.3338	5.50918	5.30686	6.1387	5.8088	4.66692	2.21276	3.78823	4.08251	3.10918	3.77924	4.40308	4.77462	4.89833	4.80316	6.57425	4.59715	3.15182	3.49533	4.39714	4.49641
PF3D7_0214400.1	8.02692	7.70499	7.83482	8.19908	8.31239	8.84473	9.46506	8.64233	8.98081	9.20036	7.82566	8.63957	8.56731	8.7959	8.68673	8.28962	8.34567	8.22036	8.83044	8.3356	8.42193	8.65425	7.9447	8.1665	9.46093	8.54016	8.12124	8.2078	8.80644	8.11555	8.88615	8.02611
PF3D7_0214500.1	4.83083	5.24311	-1.31123	7.07657	2.86089	0.118247	5.08187	6.04001	6.00702	4.90499	3.99049	0.917529	4.63673	6.10644	6.52626	3.22141	0.102389	5.30738	4.77573	5.1747	3.97049	2.81536	5.38854	0.724547	3.82791	4.91408	6.44487	4.49434	5.57576	4.09985	-0.34375	6.58832
PF3D7_0214600.1	1.6523	-1.8306	1.96905	1.44708	1.05932	1.34743	1.78419	1.70651	1.61902	1.07816	1.24766	2.15727	1.78315	0.525922	2.21689	-0.374955	-1.23954	-0.483533	0.116756	-0.200342	0.534103	0.239661	-1.50329	-1.49947	3.20675	1.09193	3.85406	1.64245	-0.588526	1.11992	-1.35878	1.70664
PF3D7_0214700.1	6.40174	4.17359	5.00254	9.20478	5.91179	1.4532	4.92804	3.00642	5.77306	5.15305	5.00122	8.04496	6.76809	6.74987	5.23599	5.64001	2.21014	3.91592	4.62871	5.15199	5.93546	5.53078	2.40681	5.88781	5.02977	5.74734	8.84838	7.21432	5.19614	1.34948	3.61215	3.90196
PF3D7_0214800.1	7.26338	7.20344	5.25212	7.56961	7.14292	7.20664	7.23574	8.53257	7.62439	7.72169	7.4419	6.38671	8.1612	8.73234	7.55555	7.11734	6.99515	7.23675	7.3038	7.08575	7.28312	6.90195	6.97018	7.5151	7.14741	7.99669	7.38849	7.03441	8.00604	6.40861	6.2167	6.53982
PF3D7_0214900.1	4.46062	8.26593	6.16267	2.83794	3.38439	4.8053	3.81624	4.90425	4.14267	4.23577	4.33648	2.38886	4.02676	2.64219	2.80759	4.61209	0.88389	3.64688	3.02663	5.34806	5.05554	6.07886	3.78677	4.81841	4.75965	2.58535	5.82727	3.85295	1.63305	3.65226	6.86558	3.94563
PF3D7_0215000.1	5.94771	6.90295	5.59013	6.78244	3.30372	7.00818	6.77731	7.88206	7.51441	6.33616	5.95103	4.56906	5.1841	4.9185	5.61663	7.28066	6.62668	5.17366	4.63202	5.46494	5.96538	6.83755	6.05881	5.53949	7.6183	4.65128	5.44784	6.33347	5.57345	5.11723	7.0393	6.22685
PF3D7_0215100.1	6.66089	9.30526	12.8443	7.62947	5.57701	5.86887	6.30459	2.63912	5.80598	5.76462	8.30616	3.23462	3.98404	4.14582	3.4803	6.60187	8.06875	7.44339	6.93112	6.67666	7.9973	7.1694	8.50142	7.36809	6.11471	5.45041	0.849049	7.95848	4.83289	5.87826	10.221	8.24101
PF3D7_0215200.1	10.1499	6.98029	12.386	11.5795	9.16172	7.21545	11.2705	12.0943	11.0691	10.845	9.32397	8.00175	8.56677	9.17802	10.8965	9.50092	13.7417	10.5456	11.4526	10.8604	9.01734	9.64739	9.82329	11.1279	9.40321	10.8284	10.6141	9.49644	12.5001	5.23516	7.84845	11.0502
PF3D7_0215300.1	5.79434	6.39279	5.38055	5.90026	5.72364	6.00122	6.43044	5.93834	6.05932	5.89638	5.68016	4.50949	5.92735	6.09272	6.29145	5.86371	6.34223	6.0706	6.23012	5.94631	5.60403	5.03165	6.00977	5.82087	5.85806	6.59818	6.5418	5.91564	6.64483	6.0436	5.29754	6.33359
PF3D7_0215400.1	9.04425	8.77005	8.28443	7.34034	8.377	9.07147	9.67242	9.40607	7.85645	9.07364	9.26955	8.82468	9.03249	9.3155	9.16403	9.02939	10.0607	9.22839	9.61335	9.61192	8.9039	8.85174	9.00498	8.98643	9.09394	9.73308	8.99351	9.35083	10.1257	8.62565	9.91208	8.64857
PF3D7_0215500.1	7.41032	7.66483	7.25943	3.84268	6.17646	6.36327	6.55189	7.41065	5.70552	6.30392	7.28041	7.12191	6.67404	6.57562	6.63535	6.73068	7.54375	6.97504	7.16875	7.72744	6.82826	7.4278	6.74262	6.8474	6.71457	7.83461	7.15662	6.77561	6.41361	6.52734	7.99926	6.3536
PF3D7_0215600.1	11.3143	8.99529	9.55148	5.23424	10.2658	12.884	11.381	13.7502	11.3473	10.5637	11.595	11.6009	10.5215	11.3516	11.1421	11.4383	14.4962	11.8589	12.1511	12.628	11.4846	11.9834	11.8708	11.4778	11.0306	11.6423	9.07334	11.9153	14.353	11.5026	15.1707	9.84956
PF3D7_0215700.1	5.86271	5.86095	5.72239	4.84095	5.51196	6.86205	5.88885	6.37931	5.3695	6.77237	5.29111	4.38275	6.07577	7.0547	5.50008	6.17829	4.99454	5.96677	6.38145	5.90733	5.96136	5.76539	6.19174	6.41286	5.5007	6.73246	6.21617	5.37511	5.88515	3.8058	6.83842	4.34002
PF3D7_0215800.1	9.57041	8.64537	12.7892	6.4552	9.9871	11.6941	11.0155	11.2137	10.8987	10.6569	10.2618	7.17407	11.4835	9.31825	9.60166	9.46463	8.40899	10.1494	10.7288	11.0066	11.4473	9.64336	9.37079	10.6108	9.21277	11.006	10.915	10.7636	13.543	10.8322	8.50506	11.0375
PF3D7_0216000.1	19.1193	20.4871	20.1033	20.1553	21.3249	20.1399	20.2346	21.1274	19.6018	19.8572	19.4738	19.3768	18.8355	20.5407	19.2834	19.3635	20.1147	19.1516	19.5178	22.0929	20.2964	20.9173	20.5045	19.863	19.3188	19.6691	19.8236	18.9412	19.8018	20.103	18.6178	19.0248
PF3D7_0216100.1	2.93601	2.46545	1.93712	2.06755	1.8605	1.87207	2.01972	1.19261	2.02323	3.07858	2.41445	2.90927	3.17688	1.76378	2.1929	2.47652	3.11881	1.64699	1.47871	1.49641	1.57881	1.38543	1.67415	3.25213	2.47546	2.27215	2.27428	2.4842	2.39854	-3.12425	2.42199	1.55585
PF3D7_0216200.1	5.84328	7.19259	5.00826	6.762	5.40869	6.30386	6.42953	6.59314	5.60947	6.95649	6.07163	5.73544	5.74887	4.5565	8.0927	6.1216	6.85297	5.90886	5.8464	5.8486	3.78164	4.74315	6.91347	6.70593	7.03117	6.13586	6.63698	5.93838	4.6516	4.7736	7.42877	7.97381
PF3D7_0216300.1	5.81895	8.1898	6.5054	7.36254	6.82383	4.96843	7.35314	5.72354	5.17895	6.37728	5.27033	4.80933	4.67092	5.2195	6.12297	5.82708	5.82947	6.8112	6.73317	6.93217	6.01547	5.90631	6.12122	5.59485	7.2118	5.9175	5.96967	6.1932	6.00178	6.13859	7.18562	7.19426
PF3D7_0216400.1	3.70469	3.75769	4.19394	3.03904	5.03214	7.05569	5.25998	8.05485	4.78032	5.13556	5.35059	3.84856	5.94654	3.3192	5.93062	2.65193	7.11761	4.34138	3.53685	3.35903	3.09482	4.6315	5.61322	5.67034	4.89246	6.26881	1.469	1.42564	4.49029	4.95489	2.37527	6.12191
PF3D7_0216500.1	5.24769	5.69241	6.33237	6.51493	6.27248	6.76947	5.57282	6.18813	5.32795	6.06965	5.18491	2.22073	5.43251	1.30458	6.08588	3.88179	6.91648	3.63772	3.51216	4.81632	4.67023	4.89806	5.42264	4.84514	5.35327	5.69752	7.61055	4.46238	8.52522	5.39255	3.88295	8.64305
PF3D7_0216600.1	6.62418	6.65118	7.08296	5.57017	5.85952	6.37575	7.10752	6.96938	6.66862	6.56153	6.68271	6.29742	6.53697	5.21688	6.74021	6.61387	6.42414	6.10945	6.54909	6.71578	6.45347	6.78947	6.52918	6.74849	6.80653	6.37387	6.22335	6.7588	6.92527	6.86467	7.26837	7.61308
PF3D7_0216700.1	3.01554	5.44541	0.00118945	2.14727	1.27534	3.4452	2.71319	1.57028	2.78742	2.02644	3.00258	1.40871	2.81085	1.96408	1.44913	1.03356	6.73467	2.34443	1.73402	4.39239	4.49755	4.62847	4.23137	-2.09862	3.18025	2.06548	3.26512	3.799	7.20711	3.02874	-0.668386	3.34678
PF3D7_0216700.2	2.35456	3.75763	8.2622	6.53077	8.60909	8.54586	9.73506	6.89179	6.58693	7.66349	2.66488	6.745	7.47886	9.3405	5.51545	8.66826	1.88127	4.33536	7.34094	7.20053	6.67882	5.66119	5.07431	5.95599	7.39219	6.72449	7.62866	2.49847	4.93604	8.33567	2.01697	2.81968
PF3D7_0216800.1	3.32281	3.77006	3.74867	5.1756	5.05763	5.8032	6.56314	2.22477	4.51966	5.17649	4.62794	2.56819	6.78396	4.46637	4.56462	3.22261	3.53632	3.79398	3.78186	2.95811	5.68259	5.29556	4.26834	4.20298	3.50676	6.54107	7.13575	4.59123	8.62258	6.28872	3.4781	5.32036
PF3D7_0216900.1	9.29368	7.16314	12.4608	4.22188	10.1658	11.0042	10.7283	9.57295	8.83612	7.84361	5.6727	10.915	8.9614	7.35484	8.9997	6.97685	6.82876	7.39417	7.74665	9.19172	8.87891	9.97413	8.50535	8.91384	8.20725	9.098	9.5538	10.5854	6.9998	10.5234	6.54432	9.32643
PF3D7_0217000.1	10.9077	9.32963	13.3792	7.93314	10.0637	8.79557	11.1755	8.27128	10.8338	10.6344	11.9651	8.61184	11.6904	9.53884	9.63416	10.0074	8.70462	9.03931	9.89529	7.99804	10.7238	10.017	10.806	8.39506	9.42391	9.80012	12.7671	9.65194	8.74549	6.7976	9.07639	10.3326
PF3D7_0217100.1	9.46499	11.9541	11.6877	8.80086	9.02249	10.0459	9.36297	9.51707	8.91428	9.28233	8.67933	4.97866	9.10011	7.04173	5.71241	8.08715	10.784	6.8363	7.82423	5.46378	11.0118	10.6602	7.6019	9.21045	8.73959	8.92968	10.4328	9.57143	11.4009	4.33888	5.95349	8.11459
PF3D7_0217200.1	4.51806	2.01424	7.84134	4.93581	5.72665	4.41032	5.84126	4.37751	5.05029	5.22212	3.73445	7.12633	6.55886	4.62589	6.63728	3.58379	6.48597	4.53682	5.02208	5.31882	3.39736	4.60919	3.92781	5.76264	4.95583	5.2469	6.39584	4.56593	3.03982	5.66845	2.11292	5.79835
PF3D7_0217300.1	3.274	10.9754	1.95531	7.26378	6.19345	7.5331	6.95753	7.13941	7.4595	6.20752	6.49984	5.63743	6.78067	11.3015	5.44909	4.94807	1.05544	6.78285	6.06005	7.76274	6.43802	6.68348	7.98541	6.5106	6.15126	6.61128	4.92187	5.74627	2.13557	-0.662753	0.838946	2.61279
PF3D7_0217400.1	5.20356	9.25251	3.60322	4.23187	4.89657	6.55326	2.13404	4.60978	4.4903	3.42466	1.351	4.28459	4.13092	4.38155	4.91138	4.18637	9.1334	6.67743	6.18566	6.19561	3.96312	6.18367	5.64552	5.18826	4.94692	3.71818	6.58172	4.727	4.09006	8.08493	7.47007	4.28953
PF3D7_0217500.1	5.26517	5.10657	5.87326	8.14619	6.80698	7.49352	5.48636	5.31016	4.30416	6.02468	7.32238	4.09751	6.65143	4.53945	3.08159	7.46728	4.88309	3.72736	3.1193	2.21058	7.90075	6.14277	8.24286	4.9899	3.68967	1.8119	2.79865	7.3594	7.98812	7.04908	5.22383	6.22118
PF3D7_0217600.1	6.69267	7.09752	7.11939	5.56723	6.59262	6.84365	4.80293	7.58151	4.64664	5.08068	6.84008	4.36252	4.84749	7.59562	4.30478	6.32564	6.50592	7.16185	6.84552	6.99432	7.63224	7.04266	5.92847	5.79271	5.80438	6.50222	6.34887	6.15747	6.23934	6.97652	7.74995	4.05616
PF3D7_0217700.1	9.40119	4.7895	12.5664	12.2272	10.459	10.4428	10.2762	12.4615	10.0603	9.72217	10.3844	10.4983	10.1387	6.77084	12.8445	10.6644	9.67729	10.467	10.683	9.84832	8.50987	9.70292	10.9921	11.2632	10.4423	11.2321	10.5497	10.4918	12.0895	10.8789	13.6458	13.8262
PF3D7_0217800.1	7.21898	8.23764	8.52817	8.2371	8.42352	8.45728	7.77641	8.57673	8.28137	7.96115	8.65447	8.61905	7.75548	8.73175	7.28262	8.24427	9.54038	8.93273	8.42918	8.47353	8.88173	8.69912	8.61622	8.61072	7.39801	6.66025	7.18047	8.9786	8.82689	8.56636	6.57284	7.64294
PF3D7_0217900.1	9.56389	7.12185	7.85575	10.5002	10.5158	8.49573	9.43411	11.3064	9.68041	10.2064	9.81652	8.51205	10.3434	7.78326	8.61397	9.07118	8.11657	7.02365	8.5371	7.69632	11.0626	9.4667	7.43141	8.4024	8.44583	8.33161	10.6203	9.36565	15.4309	10.4456	5.24471	10.4973
PF3D7_0218000.1	7.90071	11.4161	5.20715	4.04957	7.48605	4.13869	6.61846	8.55316	8.04727	7.51817	7.96091	11.4566	7.35114	4.67205	7.74251	6.98636	4.10758	7.22364	7.16946	7.44653	7.18945	7.83394	8.22339	7.38763	7.38572	5.23241	2.62706	6.95909	5.23365	8.0468	4.39636	10.2524
PF3D7_0218200.1	8.97694	9.95887	8.38171	6.9142	8.4455	8.94655	8.863	5.31296	9.66401	9.62113	9.11331	5.82314	8.58375	10.5662	8.7509	7.91436	8.43795	8.774	9.62566	10.272	8.89335	7.63701	9.19979	8.90579	7.32175	9.9871	10.6695	8.98006	8.93075	8.81826	10.231	8.02476
PF3D7_0218300.1	6.02614	5.82651	2.43534	4.07128	5.74913	3.89545	4.90676	5.89973	4.64634	4.71885	5.98859	4.35537	5.59157	5.21077	3.8214	5.8004	-2.12316	4.07782	4.94088	5.16498	7.48631	5.0889	5.11248	3.19492	4.60076	5.87505	3.60069	5.26314	7.74872	5.30136	5.10575	5.23996
PF3D7_0218400.1	6.0728	6.26141	4.2784	6.35303	5.74698	5.3515	5.49312	6.33432	5.5315	6.19006	5.5899	6.33233	6.30944	4.92618	6.56815	5.54175	5.32154	5.34379	5.12121	5.34201	5.03072	5.61834	5.47656	6.07419	6.16525	6.08953	5.82324	5.28181	5.80691	5.00161	5.86145	6.48616
PF3D7_0218500.1	5.57867	7.91116	5.83739	4.04977	4.87499	5.64605	5.59929	4.96891	5.75928	4.3963	6.75325	4.16347	5.12649	5.68272	2.80907	5.38077	5.39802	5.88108	4.58385	5.59393	7.88782	7.03442	5.45387	5.07077	5.04462	4.17002	2.80587	6.46945	6.12622	7.20071	5.6477	4.75544
PF3D7_0218600.1	8.57655	8.51843	8.95216	6.52769	9.00384	8.05994	8.44214	8.4276	7.84165	8.15163	8.39204	7.41214	8.26116	8.80028	8.47263	7.83469	9.19806	8.81574	9.02955	9.08285	8.14629	7.93989	8.71717	9.01456	7.33849	8.33783	8.79016	8.52296	8.08734	8.76901	8.87964	8.18381
PF3D7_0218700.1	8.27876	7.38304	7.08851	7.61931	7.96437	7.9005	8.98224	8.68658	9.57366	9.29787	7.50764	9.02227	8.68714	9.15379	9.02471	8.10321	7.86341	7.86304	8.47967	8.3602	8.08973	8.54327	8.01206	7.95862	8.64663	8.24632	8.45744	8.21335	7.98531	8.59089	7.71775	7.98009
PF3D7_0218800.1	8.03951	11.3306	10.5593	6.89565	7.78342	8.00788	5.9154	5.20843	7.29953	6.26892	8.82635	8.03673	6.78095	4.79362	4.41578	9.41981	10.3381	8.66547	8.02769	9.4042	10.4312	9.85994	8.45165	8.38132	6.69305	5.48722	6.87453	7.93088	11.895	8.2149	9.67799	8.00301
PF3D7_0218900.1	-0.0950217	-4.10344	-2.39134	-7.37533	-2.45384	0.722989	-0.467261	4.00374	0.675931	0.389471	0.0805983	3.70756	1.00561	-0.196156	-1.36708	-1.74861	-5.78721	0.678769	-1.71952	0.249754	-0.017607	-0.113018	-3.19617	-4.41504	3.26362	0.624367	-6.2771	-7.62462	-1.66026	-6.16346	-4.72524	-3.77467
PF3D7_0219000.1	7.9509	0.93189	1.86072	-3.4153	4.35712	-1.96771	2.98968	-2.79585	4.59844	4.80607	-1.63857	6.93762	5.72507	3.78159	3.44487	-1.37712	0.1018	7.9235	6.66702	-1.33631	4.09424	0.999233	-1.518	-2.03121	5.20577	5.02677	-3.10518	-1.71496	2.37231	10.0906	0.305409	3.90992
PF3D7_0219100.1	5.45752	2.15335	2.73895	5.40196	5.12726	6.00586	3.84543	6.63523	4.37176	4.01573	4.17177	4.05733	4.44979	4.33031	3.89463	5.33431	7.79926	4.31595	4.80016	4.57082	5.47672	5.52356	5.58969	4.53116	5.39155	4.38463	-0.721596	5.01056	8.29649	6.12277	9.62707	4.20144
PF3D7_0219200.1	6.24467	5.74627	5.70226	5.76663	5.76373	5.24358	6.37375	5.79979	6.60997	5.71774	5.21771	5.74159	5.34237	5.70602	7.3709	5.34	7.56538	6.04667	5.50143	6.31685	3.93553	4.96522	6.65401	6.60163	5.45532	4.91416	6.20143	5.42069	3.36524	5.92385	6.31872	6.60746
PF3D7_0219300.1	11.2502	7.6209	8.49156	12.2431	11.4954	10.0667	10.9586	12.3991	12.1991	11.8204	11.4849	13.8173	10.1593	12.664	11.0028	10.3794	12.282	9.80821	9.5208	9.65322	10.7285	11.4027	12.6092	9.31473	10.6231	10.1924	5.26848	9.34476	9.4164	10.339	7.44833	10.0516
PF3D7_0219400.1	10.1614	11.3791	9.22351	9.40057	10.4447	10.5969	10.1411	10.0034	10.4186	8.71298	10.053	10.4572	9.2195	10.0347	9.10762	9.90855	10.3335	9.97195	9.25022	9.61036	10.2798	10.5162	10.2416	10.2594	10.4796	9.37954	7.62508	10.3923	8.88173	9.39786	11.5964	9.13449
PF3D7_0219500.1	6.18411	3.75172	9.35724	5.63773	5.78971	7.03938	5.33975	8.70249	6.08971	5.33452	6.95955	2.7891	6.738	5.55753	5.01216	6.69586	10.8582	7.01848	6.61757	8.04283	7.70312	8.322	7.07779	6.2672	5.469	4.63797	6.19669	6.90914	9.4362	8.86459	9.82142	6.09922
PF3D7_0219600.1	4.24659	2.57535	2.76744	3.0456	5.15205	5.53264	5.05822	5.91824	4.33938	4.02799	4.27287	5.19392	5.14974	3.40328	4.40276	4.86198	7.61698	3.1844	3.15574	3.6702	4.65382	4.4875	4.28166	2.68007	4.54712	5.24743	4.71679	2.65455	8.458	6.17066	2.00394	4.42811
PF3D7_0219700.1	5.77468	5.88652	3.90124	7.53923	9.58637	10.5843	8.50722	7.52396	8.58009	8.68032	5.55322	8.29566	8.75967	8.5985	7.79808	5.74133	0.907631	3.27366	3.32985	7.34351	6.76466	7.58312	6.01801	7.72284	7.69478	9.03254	7.40793	5.32222	5.44276	5.97903	6.43104	5.05593
PF3D7_0219800.1	5.62863	2.87693	5.1231	4.72087	4.46029	4.51448	4.77098	4.48922	5.30449	4.9585	6.03407	5.84538	5.3984	5.08047	5.5129	5.24714	4.32703	5.37865	5.29952	4.01361	4.89701	4.54291	5.63078	5.10933	4.05504	5.65214	4.89941	5.10653	5.62141	3.59616	5.03373	5.35326
PF3D7_0219900.1	8.05429	8.52479	11.331	6.72566	7.45712	8.26323	6.62316	6.8801	6.20399	6.66777	8.4862	6.21385	6.64018	10.4969	2.91636	9.23049	9.22071	9.31923	9.40352	8.51006	11.7383	9.55965	7.17076	7.59809	6.55747	7.62767	6.25874	8.70394	9.9341	7.25481	7.64819	3.5135
PF3D7_0220000.1	8.91779	9.58356	9.33903	9.64713	10.4262	10.382	11.6082	9.42357	10.2458	10.0768	8.79616	9.94294	10.7024	10.313	9.68428	9.75199	9.00462	9.78889	9.96763	9.39028	10.0815	9.3274	9.55118	9.23037	10.836	9.88511	8.8706	9.86266	10.4852	8.71328	8.41412	9.44426
PF3D7_0220100.1	7.64166	8.10491	8.44957	7.6305	8.17101	8.29485	8.64103	7.74121	8.47682	8.50446	7.63368	8.39778	8.87952	8.18522	8.06288	7.87849	8.73475	8.02758	8.31801	8.09984	8.28794	8.54776	8.08319	8.10156	8.49388	8.64799	7.60427	7.95512	8.47584	7.87131	7.46985	8.02496
PF3D7_0220200.1	5.81343	5.05286	6.62882	5.60159	7.16559	5.38833	5.68651	6.31314	6.31128	5.93938	6.08115	6.21766	5.87994	4.66835	6.06433	5.43001	6.15795	5.94808	5.06695	5.4722	6.01671	6.41162	6.05589	5.83339	5.60316	5.98819	5.85967	5.80862	6.53299	5.88523	6.29831	6.67245
PF3D7_0220300.1	9.37571	7.43552	8.2716	10.4614	10.6963	9.73767	9.99252	11.0058	11.1134	9.98694	10.5354	10.3972	10.6098	8.1002	8.92829	9.147	10.4385	6.25643	4.71642	8.06264	11.1341	11.4355	9.45252	7.24776	9.15691	11.016	9.58867	10.0724	13.2478	9.83621	5.43213	10.2771
PF3D7_0220400.1	6.97291	3.84538	10.2985	8.1335	9.00654	7.6174	7.40619	7.57941	6.85858	6.79843	6.36011	9.56857	5.90256	5.57611	6.39228	7.90383	3.83165	7.39826	7.41313	7.65321	8.78121	8.67904	6.11743	6.40531	7.86938	7.50104	7.79155	6.93182	9.33303	7.74991	8.63597	7.20421
PF3D7_0220500.1	8.06603	7.40169	9.18839	8.61479	10.4073	9.81997	8.40944	9.83575	8.86034	8.72186	7.64642	9.12732	9.2613	8.29994	8.82517	7.95458	8.81544	7.86798	8.16542	8.64036	8.61448	9.57839	9.07384	8.89865	8.53392	8.66349	8.08296	8.1345	8.63058	9.45847	8.58015	8.56036
PF3D7_0220600.1	7.31726	7.35478	9.44877	6.23366	8.46065	8.72867	6.79303	8.41586	8.35008	7.7603	7.08818	8.7605	8.00886	3.36261	7.23692	7.03557	6.38798	5.92807	5.04415	6.63673	7.78638	9.40136	6.77495	7.97868	7.87389	7.99499	8.55034	6.75894	8.89146	5.80966	7.98648	8.79067
PF3D7_0220700.1	7.37112	8.91439	5.03929	7.26036	7.97232	8.269	7.45174	7.6821	7.45835	7.34002	7.34353	8.25309	7.89325	10.6781	6.07818	8.4025	8.84789	7.78439	7.41209	7.62828	8.6201	9.2624	7.49198	7.06216	8.60171	7.5025	7.07513	7.17783	6.81161	5.66478	10.0755	3.3305
PF3D7_0220800.1	2.7174	0.272653	0.38784	3.95976	5.04184	3.94808	4.35679	3.89593	2.89401	3.03297	1.35695	3.04758	4.43809	5.48814	2.79402	2.53248	4.08448	1.81561	1.44932	-0.210337	3.08545	2.21606	2.20668	3.07468	2.16864	4.60531	2.89841	3.32051	4.69704	1.53215	-0.343927	0.608472
PF3D7_0221200.1	6.5142	2.41458	12.348	3.18431	6.515	5.57715	4.45286	6.63581	2.97584	5.19019	6.69581	6.07951	3.2629	4.73207	3.53938	7.23715	2.08051	6.14435	6.07507	4.11227	7.00806	6.52161	5.62209	6.50699	3.06474	4.27665	6.51776	5.31022	3.04347	8.00788	8.1009	4.5896
PF3D7_0221700.1	7.11664	7.85997	9.31404	6.74038	7.9561	7.71878	9.61389	7.69869	8.0383	8.981	6.8297	7.94744	9.18442	8.20688	8.5338	7.52611	8.5849	9.25514	9.13875	8.63315	7.98033	8.57119	7.82622	8.48784	8.2987	9.29321	7.85541	6.49699	8.39985	9.59226	7.10417	8.46358
PF3D7_0221800.1	5.58738	-0.722262	8.20098	4.08493	3.76114	4.37374	4.60402	4.51838	4.91424	5.88004	5.13469	8.26423	6.6417	2.69315	7.1249	4.68314	1.13593	6.4273	6.26758	5.82677	4.62513	6.3578	4.02389	5.87588	5.18841	6.95378	6.55916	3.84361	6.27172	5.06741	8.89473	6.9717
PF3D7_0221900.1	9.28799	7.42623	8.10522	11.165	8.55236	12.0075	10.2921	6.36857	11.4721	11.7728	10.5561	7.54472	13.0759	11.9928	13.9933	10.5511	11.7722	9.12587	10.5025	8.37711	6.57377	6.40557	11.2114	11.1836	9.59323	12.812	14.0431	9.56902	8.47798	11.7843	13.3644	10.9509
PF3D7_0222000.1	2.22893	-1.01635	-0.503948	2.68579	-2.70832	-2.34555	0.293698	-2.93745	-0.241909	-1.66791	1.40805	4.01172	1.39973	2.15133	0.531859	2.11523	-1.39938	0.441252	0.0585472	1.12233	1.06523	0.903486	2.12122	-2.17145	-0.524131	2.68313	0.940055	2.13613	0.241668	-2.23733	-1.53526	0.0842555
PF3D7_0222100.1	8.26025	12.9856	12.0995	6.76099	12.4445	5.78067	10.2733	7.1035	6.79225	10.5842	9.55359	7.5183	11.5933	5.37623	7.88645	9.68241	5.00408	6.51556	4.86573	4.47249	8.39984	6.437	4.60353	11.011	8.39433	9.99082	11.5575	4.3834	5.90888	11.633	5.74076	10.3094
PF3D7_0222200.1	7.85885	11.3405	4.5995	10.651	7.31341	10.787	9.89913	11.3162	11.8158	9.54225	4.6353	3.42249	10.8866	7.3085	9.48406	7.76614	1.37699	5.855	6.98617	7.89964	8.02851	7.14229	8.17308	8.06607	9.45421	9.5107	10.0368	7.77897	10.6229	4.92841	3.09652	10.4076
PF3D7_0222300.1	11.2894	6.28435	5.96228	13.3713	12.7663	5.84214	10.2158	6.64952	6.71047	13.8032	10.1395	6.68688	15.4512	14.4474	11.8011	3.97153	4.02925	9.51989	9.47875	3.81837	8.23065	7.33998	11.1396	12.3467	2.73915	5.55426	12.5918	11.4596	6.48252	4.35557	4.49232	9.50124
PF3D7_0222600.1	7.50126	5.32956	5.58431	3.67527	5.52011	3.9213	6.15686	4.41234	4.06879	6.32771	8.66472	5.07552	6.50227	6.96542	5.22286	7.11599	4.17225	4.27634	3.27666	7.02356	6.17385	3.16891	7.73092	7.24423	2.2444	6.43929	3.0661	8.60948	5.84285	3.0355	5.01169	6.03832
PF3D7_0222900.1	2.08699	-1.02602	0.180679	-2.78656	-3.56451	-3.33122	1.11113	-1.8684	-0.292694	-0.609582	2.91297	-0.97696	0.909413	2.05874	-2.94347	0.871894	-3.3544	0.00244492	0.600319	-3.62243	3.25865	0.236174	-1.14576	-2.33069	-0.876802	2.41782	-2.6769	1.50198	1.47441	-2.55795	-1.86669	-1.66148
PF3D7_0223100.1	-0.0523028	-3.83957	-2.99258	3.37502	1.2815	-5.22995	-2.61461	-4.3596	-1.81096	-1.44617	-0.379708	3.17274	-5.02538	-1.42169	-3.28774	-1.54384	-4.16701	-2.79987	-1.63539	-4.93439	-0.646478	-2.2103	-2.57541	-3.05464	-2.31662	-5.28642	-4.2546	-2.2492	-2.10907	-4.59238	-3.87241	-2.71345
PF3D7_0223300.1	-3.64856	-2.49414	-1.46839	1.70165	0.650642	-4.52779	-1.77049	-4.52294	-4.11189	-1.47698	-3.71861	-3.90878	0.352304	-0.224021	-2.59892	-4.15419	-3.9331	0.722128	0.627939	1.56078	1.18644	-0.205004	-2.99944	-3.78761	-2.54049	0.69582	2.73126	1.418	5.64972	-3.73291	-3.39536	-2.09176
PF3D7_0223500.1	6.1571	12.4346	6.76663	9.26125	7.79218	7.21151	8.67382	6.98429	7.93111	7.11775	8.545	10.4536	7.6356	8.53804	10.3836	8.63736	11.0863	10.4194	10.94	9.23746	6.61661	7.08496	9.95139	8.92278	8.56356	9.68757	9.04622	9.71256	7.61648	10.7714	4.99416	10.8389
PF3D7_0300100.1	5.32204	5.86092	7.00661	7.96308	5.71689	6.40987	6.72173	2.64234	3.72029	6.08952	7.61391	8.2566	5.98609	6.23865	7.97495	5.81047	9.02015	8.51403	8.89823	8.02442	5.88849	7.64384	8.83498	7.14332	5.57124	6.95004	8.02403	9.45702	7.74156	8.01045	10.9934	8.17869
PF3D7_0300200.1	5.41295	3.65385	4.59943	7.5692	7.00707	0.802319	3.93159	2.64636	6.54474	5.35578	5.00716	3.70469	7.33267	6.3937	4.46522	5.76557	1.45627	-0.479343	2.66256	3.9889	4.8217	3.5792	2.19178	8.3579	1.59609	7.07147	8.58229	4.99416	4.88534	0.877134	3.02527	2.9783
PF3D7_0300700.1	3.92638	2.52535	3.0486	2.79842	5.29714	0.745599	3.6024	3.20898	2.89079	6.2915	3.73564	3.79313	5.94317	1.68074	5.26127	2.76055	-0.19476	1.31016	3.35322	-0.609429	2.70468	1.49565	2.21546	1.34765	4.41038	4.27642	6.83421	4.53989	3.26826	0.746798	1.11584	5.71565
PF3D7_0300900.1	-0.516756	-5.32158	-4.24959	0.581072	-2.21362	-7.40413	-2.0188	-6.84332	-3.42107	-2.05409	-6.46848	-6.35146	-1.90518	-4.79984	-2.21027	-7.32331	-6.83762	-5.21877	-7.53913	-2.88328	-4.42901	-6.28108	-4.40235	-5.18687	-3.96859	-0.722411	-7.03032	-3.2091	-3.18001	-6.07522	-6.64305	-0.0923961
PF3D7_0301000.1	3.14298	1.10983	1.261	5.3363	5.03442	2.91951	3.60315	0.812765	0.7236	5.70942	2.20801	4.02751	5.53754	4.9088	1.73085	2.6712	-2.47918	-0.0212097	-0.166811	0.354384	4.79256	5.20009	4.16914	2.55938	0.380432	5.65783	2.16822	1.44406	3.52444	2.0056	1.48867	1.03188
PF3D7_0301100.1	-1.90464	-4.88706	-3.86654	-2.11764	0.0666965	-1.79142	-1.14292	-1.02697	-0.886481	-1.97461	-5.85604	0.136642	-1.30138	-2.88856	-2.14268	-5.74173	-5.19866	-2.77976	-6.58162	-0.685024	-2.30244	-2.95044	-5.37233	-5.78916	1.96153	-0.525004	-7.79564	-2.58514	-2.77187	-5.99588	-5.67256	-2.7892
PF3D7_0301200.1	2.92436	-0.11142	5.17106	6.03095	7.70109	8.061	6.68148	5.86867	6.36975	6.18291	2.76916	7.55708	7.34316	2.98091	5.67361	4.51271	-0.377771	4.07669	3.08966	3.97955	5.42164	6.72851	5.41149	4.06695	6.34342	6.40569	5.52489	2.88422	8.42925	-1.34251	5.15147	4.5976
PF3D7_0301300.1	5.60646	5.55947	5.86652	5.61989	5.7387	6.42709	4.76159	4.59142	5.8353	5.85754	5.84034	7.27689	6.64711	4.95511	6.19237	5.93261	5.87246	6.19643	6.16705	5.63959	5.3477	5.68745	6.43813	6.9777	5.23251	5.22863	4.78171	5.59645	5.98009	6.15336	6.6105	6.50503
PF3D7_0301400.1	9.69312	8.39601	14.7644	11.486	11.6288	13.0377	11.4995	12.154	11.0064	11.0797	11.408	12.4658	11.9175	11.3079	9.18913	11.3206	7.02011	9.44286	9.89224	10.0712	12.3395	12.0212	11.3798	11.1354	11.5507	11.4216	5.52164	10.1588	8.47421	10.2156	8.40817	10.1257
PF3D7_0301500.1	4.24872	5.6224	-2.05511	3.98502	4.03913	3.93253	3.74872	4.89191	5.29885	4.53995	4.91069	5.16526	4.32291	7.29256	3.84841	3.57987	3.95999	4.97396	4.0675	3.21746	5.14797	5.2798	3.55847	3.82853	4.12934	3.67127	3.45465	4.14011	5.18695	4.94268	4.2495	1.79666
PF3D7_0301600.1	6.68007	6.11653	5.65681	7.26982	7.47032	7.8142	7.14387	7.45528	7.62098	7.89861	7.18797	8.47771	8.14655	7.70608	8.2805	7.13182	6.94804	7.03166	7.04508	6.15329	6.25735	6.59222	7.22282	7.57742	7.69685	8.0681	6.50994	6.44988	6.63884	6.56311	7.10515	7.02541
PF3D7_0301700.1	10.602	8.99496	8.13812	10.6699	12.2442	12.015	9.05835	13.1654	10.872	10.2817	10.9238	10.1035	10.6982	10.5487	10.0114	10.8935	9.92741	5.69035	5.77618	9.00161	10.2779	10.8795	9.69495	10.8444	9.53968	12.7456	11.8696	10.3657	10.6049	8.60252	10.5405	8.30239
PF3D7_0301800.1	5.81934	5.58782	4.62961	7.30884	9.41509	10.3858	8.35847	7.08114	9.09522	8.52705	6.19743	7.28009	8.53041	8.7403	4.63533	7.74594	-0.574185	2.58267	1.92904	5.27348	9.33152	8.53417	5.89674	5.5552	8.02986	8.01885	5.24806	5.12653	6.452	4.97919	7.1398	3.00164
PF3D7_0301900.1	-0.0510783	-2.76272	-1.5361	-1.29518	-0.0453069	-0.965088	0.397756	-0.0433523	2.19183	0.805399	0.685647	2.32031	0.938394	-0.865972	-1.6827	-0.180221	-4.77373	-3.32612	-5.42655	-1.28019	1.49185	2.47786	-4.11393	-1.42018	1.72988	0.384664	0.527983	-0.976769	-0.140071	-4.31958	2.18187	-3.18428
PF3D7_0302000.1	5.86932	5.59149	5.64933	6.27794	6.53209	6.66394	6.37053	6.04161	6.50991	7.00887	6.03102	6.45448	6.66228	7.16465	6.06515	6.15244	6.21442	5.93637	6.14501	5.68397	6.23478	6.28906	6.08649	5.97935	6.45874	6.81656	6.35471	5.19943	6.27974	4.27539	5.58815	4.91562
PF3D7_0302100.1	9.57278	9.01954	9.38063	8.36849	8.16584	8.44814	7.74957	8.82855	8.29674	8.36314	9.27913	8.85671	8.7952	9.16435	8.90378	9.21323	8.87418	8.79939	9.37314	9.37273	8.6016	8.68802	9.27572	9.19597	8.08515	9.42187	9.60984	9.11407	8.12057	8.03992	9.18172	8.56964
PF3D7_0302200.1	2.21072	7.73664	3.37028	1.63411	4.68942	6.0591	3.72667	4.95528	4.1751	2.50815	3.24665	2.51718	3.94589	4.11735	3.6201	4.97755	2.14725	3.4519	3.81505	4.1299	3.88451	3.84392	4.7816	5.5021	2.44787	5.53558	7.13298	3.85481	3.82399	4.65649	2.60302	3.26408
PF3D7_0302300.1	1.3693	-0.814761	4.32962	4.45379	2.17166	2.00629	1.40833	1.53021	0.11369	0.709774	1.21932	4.07805	0.600357	1.11488	3.33386	1.4012	-0.0251051	0.0920023	1.25644	4.3995	0.302576	1.90621	2.4036	2.9991	0.0379394	4.90503	3.21306	0.606226	0.266788	4.19304	-0.397091	3.27142
PF3D7_0302400.1	4.84336	2.16221	2.45337	4.21856	0.207118	1.06108	3.86114	0.708694	0.744796	2.00449	0.681494	1.23508	3.95829	3.78566	2.39432	1.0509	1.75621	4.79483	0.923832	4.68074	3.80823	1.88433	0.441645	0.279418	3.67795	3.35462	0.110776	6.02753	2.9891	8.44656	1.95201	4.0659
PF3D7_0302500.1	5.77077	8.2259	9.72143	7.55252	6.37915	5.78572	6.33563	2.74994	6.33808	4.98338	6.42364	7.64717	4.99102	4.20938	3.68832	7.17635	4.07519	4.22266	5.22779	6.10298	8.07158	8.29908	6.19038	6.32242	4.78509	6.4267	7.65774	5.58118	6.80213	5.632	3.74426	6.24306
PF3D7_0302600.1	7.10718	6.62564	6.8317	6.98734	6.7551	7.51497	7.1383	5.72802	7.20249	6.87353	8.4721	6.35366	6.6707	7.77468	6.856	4.10933	10.5368	6.43326	5.94082	7.6627	6.7809	8.12205	6.45586	7.95193	5.52081	6.48555	8.37957	7.07456	6.98597	6.54121	6.04839	6.20429
PF3D7_0302700.1	6.73363	5.0415	11.4283	3.90876	8.26591	9.0348	7.89311	9.58563	8.83509	7.07406	3.24216	4.74281	6.81366	5.61675	5.82347	3.64804	4.4072	6.37978	5.49038	3.71055	7.12354	7.6692	2.75324	8.52424	7.50993	7.50417	8.88789	8.14008	5.14374	3.11066	4.75753	5.37905
PF3D7_0302800.1	7.62414	8.38623	9.4213	7.63946	7.66788	7.77059	6.97829	7.65079	7.98778	7.42651	8.28916	7.65084	7.4227	9.24338	4.35489	7.73908	7.67983	7.19032	7.32907	6.44581	10.4663	8.24844	6.26862	6.46156	6.48953	6.91311	7.12883	7.94986	8.93183	7.92846	0.00564107	5.69188
PF3D7_0302900.1	6.18553	5.57096	6.13878	5.04806	4.98219	5.56178	4.32995	4.97175	5.23602	5.35986	6.04074	5.81482	4.89872	4.94972	5.20317	5.86918	5.43965	5.96003	5.84027	5.53675	5.8003	5.28366	6.09808	5.21332	4.92545	5.79219	5.0622	5.75534	6.04114	5.58928	5.57348	6.0022
PF3D7_0303000.1	6.26409	3.48221	12.0161	7.3761	6.52716	6.87544	5.0509	6.5642	4.93446	6.02634	5.34479	5.56937	5.96179	5.05124	5.59434	6.5833	9.06978	6.34812	6.19588	5.86987	5.39857	6.94932	7.38062	6.65218	5.89561	6.19557	7.28142	5.54599	4.32278	0.984078	7.43177	5.12977
PF3D7_0303100.1	7.1539	8.85859	7.77354	6.14007	4.56838	4.67875	3.41283	2.62283	3.57774	3.95293	7.05107	5.82316	4.25074	4.56499	3.6456	6.49754	5.6903	6.64534	6.65627	6.12558	6.89071	6.57116	6.33267	6.0959	5.01243	5.72387	3.99925	6.66103	5.02247	6.1774	9.33651	5.89562
PF3D7_0303200.1	9.29526	9.24575	8.56872	8.46694	8.0521	9.02853	8.82499	8.84661	8.4401	9.01196	9.47344	9.00055	9.25215	9.15341	9.04836	9.54229	9.46014	9.18984	10.0873	9.48568	8.99917	8.56278	9.4464	9.55777	8.46322	8.45918	8.93825	9.58964	10.0237	8.74453	9.05712	9.19537
PF3D7_0303300.1	4.14476	4.62878	4.84564	2.77084	3.89317	4.7388	2.93607	3.85416	3.66663	3.5171	3.96953	4.97754	2.86619	1.80813	2.30167	4.87747	5.0357	3.90759	3.38857	3.83495	5.09455	5.99173	3.14805	3.39404	5.05566	2.33159	4.10642	3.76559	5.22042	4.14795	7.93216	3.06405
PF3D7_0303400.1	1.68745	4.46137	-0.308902	3.37524	2.63862	2.72596	1.9129	1.12133	2.50341	1.40313	1.34683	3.23689	2.75225	0.888539	0.510603	1.14724	4.06531	1.31759	1.05603	3.04529	2.97851	2.48697	1.62132	1.48076	3.61639	1.98773	-2.27094	1.81874	5.62273	-1.77487	-0.698557	1.84983
PF3D7_0303500.1	8.71885	11.0821	10.822	7.25373	7.30567	8.86667	8.52653	5.72851	8.43376	7.95947	9.59089	9.33582	7.87068	6.95054	7.37004	9.02066	6.93962	7.76446	7.90693	9.39012	8.53663	8.45039	8.2504	8.60611	8.03663	7.53405	9.83466	6.0496	6.62785	7.89428	6.80703	8.60374
PF3D7_0303600.1	5.00314	3.24212	3.96016	2.32897	4.62914	5.81427	2.42416	3.47533	2.68286	4.14977	5.33893	4.43673	4.82901	5.22425	3.5068	4.44435	1.2006	4.50391	3.92258	5.76754	4.20384	2.04071	2.62829	1.76178	4.66153	4.6499	7.51729	0.180243	4.26053	1.03505	2.74725	1.41234
PF3D7_0303700.1	10.6968	10.5856	10.2725	12.2145	14.0207	13.2639	10.8723	13.7681	11.9273	11.4585	8.11264	9.89791	11.035	10.6405	11.1209	8.7481	9.16001	10.1306	10.1421	8.44253	10.7249	12.5238	11.8794	10.6749	10.9391	10.0228	12.0647	10.2221	10.0619	7.62917	9.95868	10.1206
PF3D7_0303800.1	6.12515	11.2118	5.70766	8.07141	9.32453	9.49785	7.02252	6.01586	5.87596	7.81319	4.20819	6.47869	8.34532	6.41829	5.48041	7.09498	5.21545	4.20929	6.25258	7.02078	7.09665	7.12454	8.56316	6.91335	7.77669	4.97258	4.58517	5.89562	5.85612	4.11742	5.78401	5.94892
PF3D7_0304100.1	17.9585	18.5635	18.2337	19.6491	17.3852	21.7193	18.2493	18.8581	17.9469	17.4328	15.648	19.0356	18.9211	16.9811	18.444	18.0095	14.0554	17.5804	18.0664	19.8263	18.0695	18.4795	19.3679	18.5175	18.2631	17.4888	16.2207	17.6051	18.2019	20.1726	15.8911	19.7422
PF3D7_0304200.1	5.73013	7.18718	8.27183	5.73382	5.42133	6.38997	5.54415	5.94681	5.37612	5.85913	5.24318	5.97347	6.29755	4.58589	4.01938	6.26525	6.28876	6.129	6.04415	5.97281	7.3253	7.12584	4.36412	5.48866	7.29011	5.21106	5.42577	5.86838	7.01427	5.41365	5.10723	5.45517
PF3D7_0304300.1	3.29619	2.60387	4.33909	4.15708	4.29296	3.97216	4.01411	3.8929	3.58768	4.33491	2.38578	2.51919	4.08335	4.51646	3.37344	3.46685	-0.0303242	2.20499	3.46144	2.10848	3.39975	2.25483	2.92952	1.64582	3.75182	4.49876	6.24607	1.81262	2.26108	0.576459	-1.04119	2.3602
PF3D7_0304400.1	8.78841	9.0268	8.47519	7.8552	8.18583	7.38308	9.10594	7.9334	8.91557	8.23305	8.5113	8.21629	8.05627	8.25363	7.75282	8.09658	8.11989	8.43804	8.2783	8.25733	8.96589	8.87336	8.27656	8.32996	8.01424	7.34256	7.53147	8.27392	8.28325	8.69078	7.93198	8.48575
PF3D7_0304500.1	5.62795	1.96911	10.2261	0.438179	5.56573	0.649083	5.33428	5.9748	5.61879	5.22426	5.17799	1.88668	5.19276	3.83089	3.06956	5.84256	1.64433	3.61576	3.42541	5.41223	6.19067	5.1442	1.02309	5.166	4.78199	3.64598	5.84478	4.5169	2.58148	6.46084	9.67876	3.49955
PF3D7_0304600.1	7.43569	6.82254	6.88243	8.32936	7.48421	2.91207	6.94543	6.9749	8.05569	5.77335	6.88063	5.07039	3.20171	5.54328	5.19074	8.15357	8.45967	6.13949	7.03102	6.70741	8.17331	8.54	7.69958	5.8525	5.91253	4.9598	6.08617	7.54718	8.84756	6.67839	10.661	6.81386
PF3D7_0304700.1	9.66422	7.55537	7.0897	6.26442	10.2856	7.26421	9.66713	11.0374	10.5719	8.96364	6.12684	6.55407	9.57367	7.33773	8.50624	7.17179	7.31974	7.44611	7.10601	6.73449	9.67256	8.85948	3.88316	8.42867	8.63506	8.8925	12.7323	8.66108	12.7339	11.1739	7.28302	8.57823
PF3D7_0304800.1	5.59697	2.53466	7.39834	2.99617	4.63495	6.7307	4.9127	2.67726	5.2131	5.13607	6.2608	2.7229	5.27028	7.92585	3.5598	3.37226	3.2708	4.37616	4.86076	3.15685	6.1827	4.18618	4.93712	1.9794	4.09202	5.77835	5.51728	4.86061	2.17813	6.22969	2.60158	2.89186
PF3D7_0304900.1	5.30499	5.7536	3.4178	6.65004	6.29833	5.85143	6.59893	7.66274	6.92713	6.29901	6.11318	5.78833	6.50681	5.60634	8.07887	4.38084	6.09519	4.45907	5.78731	4.72793	3.93323	4.8135	5.54551	6.3706	6.90941	6.46656	5.75308	5.60998	4.68817	5.34303	4.4351	7.33084
PF3D7_0305000.1	5.80449	7.5095	10.4312	6.19532	5.55687	6.45717	3.42744	6.4216	5.06233	4.96124	5.1338	4.97308	5.73406	2.19282	4.66711	6.09187	6.74105	3.63624	3.20053	3.62172	4.6669	5.11948	5.8873	5.96646	4.54157	3.83078	7.19494	5.24214	2.22959	5.43173	0.517849	7.22246
PF3D7_0305100.1	7.7886	6.24354	5.7859	10.0011	10.2224	8.9533	8.95876	9.35216	8.48194	8.84225	7.04582	5.73727	8.41639	9.44269	9.51177	7.9326	5.10434	8.1158	7.89321	8.6773	7.76972	7.32502	8.52094	8.03467	7.82649	9.23477	9.32484	6.34217	9.23519	10.419	10.5173	8.11897
PF3D7_0305200.1	8.47281	8.45537	8.01296	8.32306	8.78177	7.74106	8.75516	8.92185	8.90793	8.94073	8.10555	8.33473	8.61908	8.31553	9.18401	8.14354	8.27986	8.62968	8.95146	9.36679	8.21391	8.60483	8.24938	8.19135	9.22033	8.58782	8.90928	8.19981	8.65492	8.26871	9.47577	8.84442
PF3D7_0305300.1	7.74471	7.83738	6.9991	8.28104	8.78945	8.47454	9.48686	7.54478	9.03561	8.42854	8.13766	8.67493	8.83544	8.71906	8.57155	7.65341	8.2492	8.14312	8.26195	8.00342	8.29789	7.99796	8.14669	7.44159	9.29133	8.4389	7.33677	8.41499	8.82307	7.44091	8.00814	8.16901
PF3D7_0305400.1	3.75481	3.18784	4.19513	3.59681	5.35709	5.48232	5.3675	7.19329	6.58788	5.55895	3.49059	8.54148	5.24872	5.73775	5.53164	3.92319	1.19585	4.24873	4.54703	5.92612	4.96694	5.60821	0.744319	6.08006	6.63667	6.26731	5.97039	4.79383	4.49931	4.79929	2.25208	3.40346
PF3D7_0305500.1	8.48872	9.07972	7.59948	7.51614	8.48088	8.14123	8.32902	8.48275	8.04448	7.77873	8.5596	8.41314	8.68033	8.99459	9.09196	8.07052	9.66664	9.33056	9.43206	9.31107	7.89011	8.25725	9.254	8.85218	8.10883	8.37344	8.11752	8.64748	8.05479	9.17906	9.47626	8.60049
PF3D7_0305600.1	14.1095	15.3141	15.111	16.5401	15.8582	18.5961	17.2023	18.6985	16.8857	17.0509	16.9701	17.908	18.034	17.2997	17.9075	16.8351	12.8154	16.0246	16.214	17.037	15.8789	16.8049	17.4971	16.7976	16.7173	15.9447	17.0623	16.7026	15.2428	17.1544	14.6628	16.806
PF3D7_0305700.1	8.88955	9.09981	10.0657	7.25477	7.10663	8.39383	6.2992	8.32802	6.60498	6.29514	8.20806	7.44941	6.97722	11.3373	5.65301	8.65662	9.92435	8.91805	8.5256	8.04421	8.73964	9.7504	8.79536	7.87265	7.50176	6.6746	6.93739	8.22184	2.51181	8.22547	10.4619	3.77015
PF3D7_0305800.1	10.8496	11.2407	10.6162	9.60506	9.60816	10.119	9.8832	8.44565	10.4077	10.179	9.88492	10.4779	9.85552	9.08141	9.94037	10.6098	10.0425	9.67084	12.3411	11.5862	11.0076	11.7791	9.95371	10.9562	10.282	10.3108	12.401	10.7629	12.779	9.59344	14.0485	10.3089
PF3D7_0305900.1	4.76575	2.40721	2.55784	0.28458	0.748597	1.44494	3.22225	0.327952	4.10777	4.31589	1.36507	5.4529	0.379404	3.26726	3.29271	2.02227	2.07222	5.05342	5.52912	1.59794	3.57462	3.29964	5.24485	-0.00285183	2.91854	4.8365	-0.249999	5.47182	3.11666	0.800507	1.92754	4.06948
PF3D7_0306000.1	2.60549	0.960887	1.57288	3.56675	1.30619	4.89017	2.24126	0.0300003	3.04379	2.14879	-0.888548	0.647895	3.67381	2.25285	1.69374	3.71537	-0.46038	-1.26763	1.06365	2.69268	1.23283	-0.878816	0.071865	-0.51691	4.3921	2.33152	4.75467	-0.85909	2.22273	-0.653517	0.244407	0.0300124
PF3D7_0306100.1	7.17731	8.21136	2.64554	6.38362	6.88508	7.4732	6.47608	7.08044	7.21445	6.88331	7.02151	7.55567	6.95824	10.3397	4.63276	6.99539	7.86373	7.4022	7.29209	7.45969	9.60813	9.59146	6.12668	6.26101	6.99703	6.10781	5.87204	7.29989	9.65748	7.5017	8.39144	2.87152
PF3D7_0306200.1	7.42617	7.01066	6.87035	7.28864	6.33498	6.19286	6.8789	5.91076	7.24159	7.17247	6.6974	8.16928	5.75676	2.78711	8.46882	6.36878	8.05183	7.15364	6.76599	6.69321	5.85217	7.02598	7.04542	6.77047	7.69042	6.69537	6.99222	7.27087	8.73067	8.12927	9.16352	10.6316
PF3D7_0306300.1	7.86038	9.866	9.47639	7.41393	7.40188	7.30101	8.71959	7.29833	6.86144	7.53368	7.99826	6.79716	6.05279	7.43961	6.39313	8.28064	9.34714	8.65262	8.66873	8.37058	8.76816	8.40829	8.28968	8.44528	7.10576	5.89047	7.39201	9.1255	8.25823	8.61936	8.12543	7.97455
PF3D7_0306400.1	5.82358	4.19564	10.9433	5.5543	5.3122	7.89978	4.29049	6.81555	3.45556	4.90727	4.95815	5.4951	4.91475	4.76053	5.21072	7.46878	9.52959	7.04636	6.79653	6.47649	5.24492	6.51846	6.76051	6.18963	5.83036	5.52469	7.31442	4.87969	4.61583	6.64332	8.77857	4.92211
PF3D7_0306500.1	4.82209	11.3264	5.41033	4.29371	5.44535	8.75099	7.349	5.14761	7.09091	7.43435	5.79087	5.87149	4.24419	6.64952	4.93919	5.00395	3.93019	5.98727	6.59246	7.9853	6.39418	5.25397	3.48997	8.93766	8.19827	7.96048	3.66008	6.30436	5.59609	3.04752	4.96279	4.96655
PF3D7_0306600.1	6.69791	4.05379	3.88152	8.23549	6.65244	4.49279	6.84422	4.57025	8.97005	5.8815	3.32114	10.7811	4.49203	6.31582	9.53074	3.89936	4.21522	6.57051	7.8932	8.05296	3.39608	6.17182	7.83287	7.79683	5.35927	8.67848	3.86637	3.54043	4.60099	3.01212	4.7122	7.66382
PF3D7_0306700.1	3.56748	0.27546	6.51573	4.26829	3.06526	2.1712	4.03783	4.49736	4.0669	3.55246	4.16862	3.72753	2.41965	1.18878	4.34539	3.04547	3.97647	3.99625	2.39079	2.61377	2.78372	4.3365	2.71505	3.78039	4.52626	2.43315	2.62214	4.27217	1.58542	4.73916	7.40585	5.29762
PF3D7_0306800.1	6.92837	9.0278	8.58602	8.19754	8.48851	8.51915	8.36485	7.75936	7.01932	7.604	7.5318	5.01119	6.63267	7.2811	7.61044	7.08066	7.64827	8.57698	8.84053	8.16764	7.68601	7.4384	8.79081	8.0807	7.2941	7.77687	8.07686	7.39117	8.37399	7.86061	8.42938	8.51924
PF3D7_0306900.1	8.03197	8.51749	8.5128	8.58738	8.5057	8.87489	9.24342	8.26806	9.11398	8.4933	8.10347	7.84757	8.30923	8.94146	8.47754	8.54661	9.02071	8.78187	8.67507	8.25553	8.2567	8.13303	9.11902	8.71737	8.24201	8.10288	8.07221	8.15794	8.24228	7.97825	7.85379	8.28933
PF3D7_0307000.1	9.19651	8.16804	9.15058	2.51981	9.52959	3.8835	9.96206	3.42998	8.90659	9.39852	3.88608	13.8539	10.9467	10.7455	11.1372	12.0219	15.776	10.3568	12.4928	14.1927	7.91854	6.43553	11.5246	1.55668	10.5539	9.08892	11.8977	11.1016	9.22312	12.5801	6.61092	8.86665
PF3D7_0307100.1	7.29234	10.1361	9.82154	9.58767	9.84689	9.60344	9.35056	9.23951	9.82332	9.68792	9.70457	8.63974	8.97454	10.8592	8.46974	9.81391	8.6637	10.476	10.2762	9.6827	10.0039	9.04969	9.73475	9.89902	8.9912	9.2922	8.35985	9.40675	9.24458	8.98837	7.72088	8.3739
PF3D7_0307200.1	9.10399	9.80502	9.76807	9.36735	9.78901	9.84296	9.78714	9.27585	9.64247	9.15568	9.19984	9.40576	9.42951	9.3055	8.82545	9.66164	9.12004	9.607	9.72229	9.28507	9.96565	9.7579	9.9561	9.80998	9.09399	8.30291	8.58415	9.77491	9.853	9.42098	9.34098	9.38754
PF3D7_0307300.1	12.7218	12.5879	12.3065	9.9787	11.3381	11.0747	13.1301	10.5769	12.2965	12.4126	12.8691	11.047	14.2904	13.2589	13.1653	10.4921	11.0779	9.45659	14.3212	13.2478	12.7796	13.5899	12.5815	11.7685	10.9565	13.4336	14.9032	13.9924	11.9602	16.2784	11.9591	13.4337
PF3D7_0307400.1	12.408	12.2099	11.7747	10.473	9.35768	11.219	11.9855	10.928	14.0972	12.1851	12.8538	11.3024	14.7666	12.2632	12.5086	13.9119	10.7807	11.1728	11.1811	10.0279	12.0719	11.7601	11.1228	11.9232	11.4657	12.4644	15.8873	11.9583	11.4642	13.9595	11.6061	12.1756
PF3D7_0307500.1	5.86959	6.53212	6.43813	8.93998	7.03888	9.26414	7.10163	9.52163	7.13028	7.31359	7.55216	5.84345	6.99499	7.34609	6.60157	8.34447	5.77639	6.08065	6.51164	5.13332	7.41744	7.04024	8.70335	7.00163	7.03315	6.24192	4.03396	6.71567	6.60403	9.84356	6.21823	7.53261
PF3D7_0307600.1	7.89485	9.74897	9.08881	10.2792	11.2193	13.608	12.6439	14.6673	12.3884	12.3754	8.37414	11.4176	10.752	10.7019	13.643	10.9483	9.30348	10.0671	11.3848	9.14829	8.54507	11.1016	11.6852	12.4389	11.2783	9.93359	14.3057	11.4502	9.23296	11.1365	10.2086	11.3481
PF3D7_0307700.1	11.6492	10.3248	10.2287	10.8952	12.5256	11.6835	10.9797	12.8046	9.60006	11.3102	12.1747	12.715	8.38016	11.3482	11.0088	12.5308	8.91443	12.3006	12.7641	13.0009	12.1446	11.3304	11.2036	11.7091	10.0898	9.71498	13.6689	10.8223	14.2522	12.0091	13.2102	10.5322
PF3D7_0307800.1	6.28078	6.99554	9.20427	6.67509	8.5262	7.63292	7.46366	6.18776	6.37157	6.02181	5.84572	6.63691	5.52021	4.70108	6.06049	7.366	7.61593	7.31169	6.39263	5.45636	7.41118	7.77499	9.3909	6.53917	5.01886	7.24182	6.8793	6.01744	8.46896	7.61323	6.04108	8.06798
PF3D7_0307900.1	10.2929	7.25861	6.67727	8.88077	9.85974	11.0288	9.81065	9.72587	9.94133	10.0025	7.92834	12.7001	9.54852	12.2258	10.396	9.73101	11.0718	9.74075	9.58646	11.7422	9.21387	9.01936	8.75406	9.42736	9.08152	9.89303	11.0605	8.31174	11.3607	10.5985	7.05542	7.27228
PF3D7_0308000.1	8.28573	12.1959	6.91265	4.7139	7.70389	10.8646	6.93231	5.31207	5.41528	7.83808	7.25323	8.93343	7.38098	8.16716	4.94921	4.65014	4.62292	8.16556	7.64945	9.23186	10.0246	9.37352	6.75059	7.51962	7.57267	7.45688	3.61129	7.52172	7.51725	10.5343	5.80818	6.61558
PF3D7_0308100.1	6.2878	4.93023	5.33566	5.58676	7.99122	8.75235	5.91533	6.44796	6.52883	6.17564	5.75861	4.47203	4.49304	6.29774	5.50984	2.28714	7.89707	4.00263	4.95569	5.23426	5.2339	4.26359	2.56685	6.00362	7.33436	5.76551	5.45305	5.45784	5.62619	4.71112	4.26672	4.43657
PF3D7_0308200.1	6.96985	6.18213	8.65115	7.568	7.07133	7.01096	6.37288	6.85469	6.44883	6.85893	6.85566	6.60164	6.14571	5.82547	6.06491	7.61309	6.92415	7.14096	7.42902	6.32332	7.44855	7.00311	7.03089	7.27736	6.58826	6.21246	5.98229	6.97325	7.93135	7.02806	7.78255	7.25629
PF3D7_0308300.1	6.27702	4.45928	5.19657	6.92945	5.50533	1.83221	5.77313	4.41767	5.07267	5.1353	5.93117	5.1886	6.56021	4.49605	7.10671	4.49244	7.62492	4.62318	4.81364	7.21384	4.05273	4.78259	3.14233	6.87086	5.58265	4.78999	6.97904	6.21796	5.31263	7.63253	8.11104	7.07051
PF3D7_0308500.1	5.99295	8.03117	7.48724	3.78143	5.18405	5.7723	4.27313	5.2361	4.88148	4.38657	3.52332	4.94196	3.74271	3.24932	3.26047	5.87972	2.26046	5.31541	5.45096	7.09653	7.0541	6.11633	5.15485	4.27476	3.93381	4.397	8.45309	5.39917	7.66517	4.16352	1.79639	5.40112
PF3D7_0308600.1	5.74822	7.71959	8.4795	3.59471	4.15493	4.17201	2.66912	4.09851	3.37948	3.83326	5.70617	4.85035	3.45063	0.234853	2.72044	5.44454	5.67346	5.25504	4.982	5.01393	6.44918	7.19406	5.57916	4.73997	4.00086	3.28022	5.05967	5.44898	6.92953	4.98617	6.79198	6.79949
PF3D7_0308700.1	4.40372	4.36045	4.9266	7.62972	6.7022	7.58062	5.12051	7.14185	6.45683	6.65845	5.6429	3.92105	5.88946	6.15229	5.38379	4.6753	2.71254	3.13168	3.75185	4.32505	5.65296	6.62719	5.96213	5.20226	4.66534	4.97938	9.21569	4.98043	5.16442	1.83028	3.75296	4.06367
PF3D7_0308800.1	9.74934	8.48074	8.24104	10.8631	11.3439	7.5691	11.0908	7.03251	11.545	11.3702	6.28793	7.48419	11.0623	9.3472	8.95265	10.5487	7.91227	8.03994	10.1787	6.98306	10.4978	7.25873	9.5919	9.55391	9.4461	12.3814	5.50414	10.3214	14.5254	5.84257	8.2967	10.2654
PF3D7_0308900.1	6.55899	5.94787	7.22383	6.77623	6.83228	7.13826	6.96816	6.93252	6.42863	7.54196	6.34742	7.03385	7.53406	6.84429	7.14697	6.79846	6.77889	6.75137	6.80565	6.79138	6.35748	6.81539	6.67797	7.13773	7.17749	6.98281	6.64126	6.05922	6.27469	6.29478	7.35083	6.53441
PF3D7_0309000.1	4.56809	4.85504	3.8316	3.94511	4.82224	4.48381	3.71904	2.96745	4.14905	4.58934	4.46657	5.03016	4.65579	8.50281	3.75867	2.86209	5.26066	5.00263	4.35185	4.60356	4.40204	5.24652	4.73544	3.49177	4.53747	4.51095	3.22606	3.93816	-0.668593	3.94076	4.65791	0.915213
PF3D7_0309100.1	7.32427	7.07269	7.61221	9.98156	7.97291	4.23434	9.89309	11.7444	10.8758	9.6325	7.70938	5.86292	11.226	7.64918	10.1491	8.92905	4.46206	6.54286	7.89953	8.37707	7.85761	7.67812	10.4225	7.96654	8.59202	9.04545	3.02526	8.81604	7.51394	8.86121	5.70901	12.2686
PF3D7_0309200.1	9.16849	9.60003	9.94761	8.58306	9.32617	10.3876	8.42646	8.7032	8.20584	9.27524	9.43844	8.57691	7.68571	9.876	9.10486	9.22085	10.6162	10.0827	10.9251	10.6013	9.02541	8.44669	9.4631	9.73821	8.69147	9.67447	10.6872	9.39193	9.9751	8.77374	9.95795	8.5073
PF3D7_0309300.1	4.85833	5.59257	7.98718	2.52929	3.98437	4.8486	2.20647	3.50728	3.01902	3.2303	4.8496	2.65263	2.21335	5.95315	-0.0541451	5.35336	5.56256	6.01247	5.85745	4.92269	7.87724	6.79754	4.5658	4.43013	2.10953	3.7572	3.91805	5.32922	5.8417	5.1531	5.59543	0.948103
PF3D7_0309500.1	5.33758	5.53404	6.41102	6.70186	6.3968	6.75109	6.1698	5.8998	6.54367	6.48271	5.71345	6.2404	6.3035	6.22762	6.53675	6.37958	5.89276	6.42543	6.33891	6.23462	5.75816	5.44259	6.53706	6.69363	6.2087	6.55144	4.89372	6.06158	6.06507	6.65464	5.89681	6.58826
PF3D7_0309600.1	8.30416	8.6753	9.22669	10.4923	8.88526	10.0303	9.56395	7.92177	8.65624	8.05476	9.19086	7.42722	8.47844	8.51838	7.45419	8.98141	7.78289	8.55635	8.93887	8.58646	9.98118	8.64404	8.90715	8.75211	8.4448	7.40535	7.86861	9.23369	10.9333	8.98522	8.26292	8.9339
PF3D7_0309700.1	4.70361	5.31272	5.60015	6.16888	6.58963	7.39461	6.75305	5.53921	6.63949	6.42178	3.71858	6.15798	5.61054	9.03693	6.67499	5.45885	1.08328	7.29207	7.59252	8.34372	5.60544	5.51369	5.42419	6.59935	6.5704	6.93636	6.67501	5.1414	3.4782	5.94609	6.8981	3.91144
PF3D7_0309800.1	3.15769	6.13381	-0.437466	4.48962	4.96248	6.6623	4.79861	4.96358	5.19737	4.69626	3.69337	6.08156	5.01392	0.983971	7.95487	3.06544	5.37036	5.44361	3.8985	5.36212	2.21356	4.76791	6.28664	4.68333	5.93038	4.70649	5.0224	3.93215	7.22292	5.54849	7.64677	8.24579
PF3D7_0309900.1	4.7248	3.12581	3.44613	5.38532	4.67643	4.68878	2.93041	3.42583	3.68056	4.85985	3.28457	7.2047	5.41565	3.97945	4.63702	3.89084	5.99707	2.977	2.35112	3.23888	3.67323	4.56932	3.64304	3.78906	4.25606	4.26943	4.93617	4.73431	3.95054	4.26091	2.29377	3.86714
PF3D7_0310000.1	10.5414	9.78331	9.80712	9.45421	9.54145	12.06	9.39678	11.7969	10.4614	9.99849	12.2936	10.4283	11.7169	10.7427	11.6666	8.3261	8.50007	10.8907	10.2622	11.881	10.1695	10.2062	10.8372	10.3194	9.94041	10.0285	10.6683	11.8255	9.76062	11.6089	8.81875	11.8506
PF3D7_0310100.1	3.30813	1.11457	1.61362	4.79377	4.12448	5.74571	3.67476	4.20588	5.09896	5.11429	-0.524787	5.481	5.84732	2.12439	4.27708	5.24035	0.543576	2.38937	3.6982	2.68019	3.98242	5.9605	3.65875	4.29536	4.46718	4.94825	6.1365	2.43341	8.48477	-0.903711	7.11107	2.49758
PF3D7_0310200.1	6.58106	7.64073	8.49742	7.49745	9.75659	8.96429	9.19635	7.91706	8.26593	7.86603	6.52687	8.29769	9.27782	7.80768	8.1456	6.85855	8.82526	8.27132	8.38033	8.90054	8.12259	8.642	7.74302	7.67587	9.1163	8.46505	7.35399	7.0363	8.9989	8.44801	7.40254	7.90599
PF3D7_0310300.1	8.31317	7.94418	7.83448	8.01389	7.71515	8.46095	8.57294	8.43937	7.98826	8.94811	8.21809	8.56327	8.73699	7.84374	9.38874	8.1787	8.34725	8.53346	8.68926	8.81958	7.54733	8.01194	8.55978	8.57718	8.49587	8.60711	8.81088	8.01007	8.65005	8.26063	8.8349	9.15386
PF3D7_0310400.1	7.5067	9.83408	5.12584	10.2596	10.1538	10.9045	11.3405	9.29449	10.7929	11.3191	6.69721	9.55138	10.8786	12.0039	11.0876	8.20993	7.07589	8.68191	9.33775	8.88966	8.48281	8.25714	9.10856	9.04541	9.52923	10.9524	11.3004	8.71395	9.75236	9.66704	3.84824	8.82078
PF3D7_0310500.1	7.19351	7.89295	8.76161	6.59947	6.90385	6.31529	6.45004	5.65254	5.28978	5.535	6.84637	7.28418	5.77169	3.51194	7.10273	6.70246	7.31643	7.52603	7.68149	7.89403	6.32398	7.0243	7.88433	6.87964	6.64936	6.01827	7.11557	6.96377	7.5587	7.04687	9.08134	9.24903
PF3D7_0310600.1	5.56679	6.08066	6.04888	4.9341	5.65067	4.85401	4.82758	5.2967	6.3891	5.68874	6.32797	6.39244	5.68594	5.82914	5.55208	5.38668	5.82268	5.94191	4.86272	4.54929	5.612	5.89881	5.61287	5.68227	5.43774	5.26166	5.13114	6.60757	3.4536	6.08746	5.52222	5.60009
PF3D7_0310700.1	3.17332	4.46345	5.38508	4.30816	3.4748	4.17057	3.19835	5.48966	4.03391	3.89109	3.97197	5.05118	4.18061	4.25	6.87007	4.12519	5.84586	4.66119	4.28728	4.19287	0.627985	3.1285	5.29074	5.89761	4.63778	4.39047	4.74506	3.96664	-2.64772	5.18347	5.23017	5.13197
PF3D7_0310800.1	9.14067	8.23158	8.89915	10.7264	10.6631	12.5722	9.86485	14.2262	11.9156	10.2152	12.3954	6.44565	11.8811	11.0647	10.7081	11.103	6.45188	12.8368	12.3326	11.9074	11.9259	11.2936	12.2726	11.8513	10.4176	11.4191	10.6913	11.2921	16.0297	4.21409	16.8525	9.86503
PF3D7_0310900.1	8.2448	8.04629	8.22899	9.70867	10.8109	12.3837	9.74151	11.6821	9.04804	9.73891	5.33686	12.6538	9.37209	7.25162	11.307	9.23323	5.53615	7.99527	8.33702	8.11785	7.31849	9.21269	9.86706	9.88706	9.39128	9.15961	10.4537	7.5779	8.18695	10.5448	6.35828	10.5509
PF3D7_0311000.1	1.60675	-1.10829	-0.572574	3.34658	3.23501	4.21699	0.349357	-3.07495	1.82372	1.39313	-2.51474	6.27494	2.25631	0.586846	0.822035	3.46222	-1.12456	1.22465	0.849527	-2.04747	2.88676	-1.06305	-1.86943	-2.02618	3.48172	2.7721	3.60773	3.54109	7.17279	4.30097	-1.33738	0.985317
PF3D7_0311100.1	7.13548	7.90484	8.21562	8.48068	7.98123	7.59107	8.88047	7.77218	7.3885	7.93336	7.2924	7.83175	7.20918	7.5174	7.72618	7.68334	7.22239	7.49083	8.01912	8.31436	7.71799	8.22406	8.04757	7.72156	8.30078	7.46825	7.23004	7.77014	7.37155	7.1236	8.08308	7.91394
PF3D7_0311200.1	6.92668	9.31464	8.03521	6.74433	7.79056	7.67909	7.45318	6.66823	6.57663	6.61834	7.29109	5.02833	7.03628	8.54416	4.41635	6.51049	7.40701	7.43793	7.36967	7.83591	9.51471	6.85764	6.46892	6.5678	5.61794	6.84064	6.7168	7.06579	9.81965	8.00121	0.806047	6.06686
PF3D7_0311300.1	4.58247	6.25676	4.87856	5.78167	4.63446	5.01404	6.40474	4.71985	5.07066	5.26121	4.96945	2.44458	4.89894	1.89776	3.35984	4.62121	4.57516	2.68176	2.36735	2.64995	5.84167	5.97637	4.74115	4.96182	4.62436	3.10824	3.40075	5.03832	6.81758	5.13955	4.79451	6.43046
PF3D7_0311400.1	13.2438	16.1671	12.0523	12.9081	10.5118	12.9079	12.6828	12.4844	11.8819	11.6228	13.3236	13.3174	11.7724	12.456	11.0742	14.5349	13.293	12.2243	11.3081	12.9343	13.4649	13.6723	12.4072	12.6852	12.197	10.864	14.1139	12.5109	12.2633	14.2546	11.1451	11.8944
PF3D7_0311500.1	4.01879	5.11461	4.79303	4.44188	3.79372	3.72653	3.1481	4.01042	4.22978	3.35939	4.39895	3.57039	3.55181	4.78279	3.82707	3.30536	5.19338	3.85213	2.91037	2.73706	2.99936	4.59211	4.37235	4.28465	4.07808	2.87746	3.31685	3.72949	-1.53999	4.45784	5.164	3.02108
PF3D7_0311600.1	3.35277	7.21282	1.46275	6.20182	3.84565	4.43336	2.61847	4.68651	3.63006	3.4844	4.37757	5.65166	2.1814	1.25745	4.59957	3.74963	-0.323722	2.97197	2.72993	3.30456	2.96761	4.05291	3.50261	3.66962	5.30291	3.19455	3.67557	2.85723	1.92161	5.53053	4.07709	6.01992
PF3D7_0311700.1	18.9786	18.8718	24.2196	21.6383	19.4172	21.4986	19.9941	17.1629	20.1278	19.9007	18.9977	17.5389	21.4429	19.0473	16.6449	20.8959	15.5372	17.5489	18.7694	15.2228	20.8544	20.3925	19.6859	19.7431	19.0641	20.265	19.6444	15.5129	18.1425	14.3618	17.5221	17.4209
PF3D7_0311800.1	8.12835	9.84948	9.08535	8.11962	7.065	8.8818	8.71895	3.79956	8.09453	7.46673	3.84969	7.10345	9.15465	4.23367	8.76399	4.0296	9.21834	7.32907	7.48513	6.76902	6.03325	9.1376	9.22212	7.68231	8.19209	5.13907	6.84119	8.8778	5.12751	7.88601	8.99349	10.7796
PF3D7_0311900.1	8.28046	8.09043	12.6556	6.47124	9.15465	10.6338	7.93471	6.78845	7.74219	8.68666	9.68753	7.14562	8.22328	8.53583	8.34014	7.06766	7.36749	9.84113	10.2816	10.0946	8.96783	7.17652	8.65317	7.64698	8.14337	7.45955	11.0865	9.93054	7.84297	8.97616	7.7363	9.1285
PF3D7_0312100.1	7.25413	11.0197	11.7117	4.26217	4.78787	8.2066	8.08455	7.54683	8.49025	6.0756	7.30298	4.51151	7.02132	6.67785	4.76556	8.35164	5.11673	7.43635	7.32002	7.96339	9.75916	9.68129	8.08164	7.46288	5.92835	6.59267	9.30962	8.84039	6.56998	8.34542	5.41346	7.315
PF3D7_0312200.1	9.03205	8.16042	13.1605	10.4465	8.45306	12.4966	9.82969	7.30176	9.83768	8.20248	9.84429	7.90412	9.49303	9.37656	8.39169	10.1946	12.5213	9.3039	10.3237	10.8852	10.3612	9.38208	10.0801	8.89018	9.02669	9.67168	11.2423	9.09629	12.0437	10.9685	8.05596	9.40831
PF3D7_0312300.1	9.29359	5.64129	6.49191	11.8304	9.02615	10.8473	9.83989	12.5915	11.5011	9.51075	9.08509	6.58808	10.6542	8.58471	12.6355	9.40936	9.57718	9.70803	8.93683	9.52238	7.99828	8.28424	11.1282	9.7275	8.58098	9.65244	11.0811	9.49308	13.3597	11.8725	10.697	12.5285
PF3D7_0312400.1	9.73301	8.01346	8.47699	8.79476	10.7181	12.3624	9.68625	11.2838	10.2425	9.11332	10.623	9.99333	9.04722	8.20103	8.60606	10.1796	11.5552	8.19649	8.26575	9.10066	10.9153	11.235	11.0113	8.96371	9.49512	7.71778	7.39721	9.47652	12.9975	11.4426	12.0156	9.57955
PF3D7_0312500.1	4.89133	7.62641	2.84414	6.43209	5.08581	5.47545	3.62035	5.522	4.84469	4.40638	5.43765	4.89028	4.74106	3.30155	5.34841	5.3259	6.82827	5.39189	5.60035	5.00301	5.07023	5.97325	6.12317	6.01417	4.61209	4.60973	4.93187	5.07956	7.7586	7.41083	6.6547	6.83699
PF3D7_0312800.1	8.1792	9.82469	10.6806	9.73213	10.3269	10.2319	10.6012	9.96067	10.7169	9.65342	9.44998	9.61479	9.54953	10.2014	10.2248	9.21405	9.77836	10.5783	10.6288	10.3543	9.50395	10.0204	10.6416	10.2441	9.82886	9.54999	9.2669	10.0179	8.76418	10.2346	9.10593	10.1572
PF3D7_0312900.1	6.60317	3.94875	4.43019	6.93986	8.3422	6.47512	8.99055	8.71605	8.36469	7.4917	7.65229	6.22177	7.35644	12.9856	7.46906	6.54829	10.3288	6.1529	7.92593	9.41908	7.06917	6.87651	8.6878	6.99586	7.78083	7.72884	-0.0672236	7.62923	4.53475	9.13699	9.3763	4.25357
PF3D7_0313000.1	5.52118	6.91794	8.43796	2.68434	4.45288	6.06115	2.85825	5.06618	3.5702	3.99165	5.03336	5.04094	2.88559	2.09681	2.78808	5.64786	8.67068	6.44169	6.48147	6.67225	6.48688	7.71927	5.73571	5.29112	4.75757	2.89512	4.65699	5.22343	7.13335	6.37335	9.11629	5.02393
PF3D7_0313100.1	10.6148	5.28456	13.2417	10.1297	11.7704	14.3971	9.96215	11.4146	10.5166	11.3956	11.2474	10.7986	11.0241	12.1256	11.298	10.9072	11.5975	10.8219	11.1639	11.3377	10.5657	10.1172	11.2871	11.7079	9.58999	11.8556	11.9178	10.2183	11.7464	11.27	12.2177	9.39643
PF3D7_0313200.1	11.9238	19.6849	22.0176	14.8478	15.4452	17.9313	13.9316	11.8001	10.6222	14.4494	15.0094	12.6398	14.3609	14.485	12.428	14.9355	11.4751	15.9961	16.7632	17.5261	15.7263	14.513	15.6118	15.5939	14.4878	15.8375	16.4633	14.3228	11.7002	15.3438	12.7109	14.6079
PF3D7_0313300.1	4.60378	5.61826	6.59767	4.90397	4.98333	-0.491535	2.47154	3.08184	2.01295	3.57194	6.36549	3.19292	1.70433	5.37735	0.692493	5.13183	8.40554	7.14809	6.95671	8.06417	7.56277	6.56506	4.55597	-0.967848	5.20159	-1.55594	4.60796	4.65287	5.23745	5.98849	6.87847	2.07028
PF3D7_0313400.1	8.48277	10.8714	12.2099	8.14861	8.13944	8.71597	8.0431	9.56138	7.89875	8.22651	8.66262	8.56579	7.04138	5.50725	10.0991	7.87358	8.57935	9.57218	9.50852	9.54032	6.83786	8.74362	10.0675	8.94949	9.30715	7.83613	9.48191	8.58988	4.64694	9.75367	9.40583	11.9344
PF3D7_0313500.1	8.82007	5.49979	12.4968	7.15083	7.58768	8.02467	6.42865	8.6773	6.51787	5.41604	9.54714	3.34292	6.35345	7.6716	4.77869	7.69487	10.9974	10.0115	9.39979	9.59856	10.5518	9.50313	8.0914	7.26732	6.25592	5.97849	7.2943	8.49665	11.2139	9.52831	12.1241	6.6649
PF3D7_0313600.1	15.529	15.2543	15.0631	12.4933	17.0064	19.768	15.7787	12.9507	15.2831	14.9698	12.2756	18.7598	14.2317	15.3774	14.3447	12.8388	12.0677	14.6694	14.264	16.9965	16.1403	16.6248	15.2496	14.5451	14.7103	13.9691	15.5791	15.7406	15.0389	15.366	13.6947	13.5569
PF3D7_0313700.1	12.4708	11.7932	11.2412	10.7942	12.3169	15.084	13.1831	11.1379	12.2959	11.7297	9.50496	17.3171	10.769	11.3021	12.0591	14.1435	10.4361	11.9678	11.5323	9.87206	11.6713	13.0947	13.3484	11.9572	11.3992	9.86329	13.6707	9.62123	10.9319	13.7603	11.2091	10.9244
PF3D7_0313800.1	8.08022	7.23592	7.29727	6.36662	9.5557	8.90977	7.67103	7.18126	6.59487	8.55097	8.78484	11.4317	8.83147	8.16746	7.52115	6.12946	5.8115	7.64578	6.52573	7.09682	8.62025	8.72389	4.79756	7.44009	8.54691	6.72494	10.219	7.55253	7.23849	9.15102	6.89943	6.39626
PF3D7_0314000.1	13.7435	13.8733	20.4922	10.9689	13.4718	16.7783	15.5785	11.3177	15.8225	14.7381	11.5597	15.6675	15.1538	14.4463	12.3108	12.543	11.6126	16.751	16.7153	18.4513	16.7484	16.427	14.4904	14.7145	14.8178	13.3013	8.70016	14.0045	13.7052	16.8123	12.7453	14.4297
PF3D7_0314100.1	4.36197	1.83553	9.74137	6.30182	5.31599	5.3677	6.0424	5.60953	5.38815	4.33822	7.1889	6.9578	6.28925	1.62977	5.77998	6.01806	8.44119	7.78121	6.46095	7.03288	6.00019	6.61642	7.10765	6.84071	6.50556	4.24199	-0.806795	6.62139	8.79963	7.21768	10.0345	9.35383
PF3D7_0314200.1	7.88804	6.12628	6.39033	7.70213	7.75782	8.1876	7.81412	6.62162	6.8219	7.7837	7.63989	9.59619	8.22195	7.35629	10.8804	6.21311	9.06783	7.9637	7.85617	8.14473	4.71119	5.0789	7.88336	8.06054	7.128	7.97011	10.3585	7.58032	6.69877	8.21727	5.61553	9.55657
PF3D7_0314300.1	8.24748	6.8546	7.01245	4.78508	6.11995	9.07837	5.74858	5.22832	5.18582	6.65694	9.26221	5.71058	4.77637	7.73282	7.14352	4.94219	11.6403	8.23685	7.78854	9.44854	5.92049	5.48856	8.20216	6.74195	4.50127	5.91937	8.39177	4.65966	7.28228	9.00711	6.05078	6.69588
PF3D7_0314400.1	7.12296	11.1443	5.42951	5.92653	5.10302	7.56626	5.78407	6.49641	4.40677	5.59783	8.16778	3.25375	4.53963	5.17127	5.64658	7.01346	7.62388	8.11881	7.94935	7.93412	7.90351	7.01914	8.43721	7.27663	4.88941	6.82589	7.24395	8.75919	10.8961	9.32164	9.23893	8.61321
PF3D7_0314500.1	6.62381	6.06567	5.33821	5.75486	5.67129	5.12056	6.60906	6.50495	7.17496	6.60624	6.37966	6.14033	5.68465	6.20085	7.04879	5.85727	6.15824	6.4163	6.65088	6.83529	5.94116	6.21955	6.36764	6.58368	5.72245	6.04241	6.45735	6.5246	6.61294	6.79286	6.39116	7.0926
PF3D7_0314600.1	8.28592	7.53814	9.08346	8.19369	7.35281	7.39325	7.61501	7.55223	7.52605	7.6736	8.12731	7.99943	6.75672	8.19469	7.11171	8.37281	9.60388	8.43249	8.71719	8.28258	8.37762	8.67658	8.21017	7.56807	7.99845	7.72982	7.04885	7.71907	7.84284	7.88176	9.20307	7.19763
PF3D7_0314700.1	3.69344	6.54544	1.46818	1.51562	0.360134	3.59923	2.60823	-0.235664	2.90228	2.12586	3.16341	2.86482	2.5983	2.20347	0.104164	3.67183	4.1488	3.00868	2.48393	2.89042	5.69942	4.42517	1.85341	-0.782505	3.44363	2.21502	4.80808	2.72444	7.05716	5.36658	0.593191	2.11791
PF3D7_0314800.1	2.53954	4.01029	-0.78692	0.311825	-0.572242	1.36159	0.141204	-1.92814	0.613657	-0.767158	2.9134	1.82533	-1.8145	-0.196778	-0.385444	2.74364	3.4832	0.276222	-0.684542	-1.14839	1.20095	0.964283	1.55786	-1.38758	0.959113	-2.01541	3.65966	2.32375	-0.0356524	1.99897	3.83589	0.253358
PF3D7_0314900.1	10.1066	8.48152	8.12869	6.39907	9.07897	11.0411	10.4292	6.59261	11.0061	10.6141	9.24693	13.0414	10.8772	8.68485	9.74929	7.69027	8.03733	9.24723	9.00754	9.79735	10.652	10.3513	7.70296	9.27224	9.52058	9.07371	10.4957	10.8187	12.883	10.2177	8.11207	10.0038
PF3D7_0315000.1	1.22099	2.16058	-4.87701	1.56318	1.28217	2.20286	0.582368	-5.68037	1.21934	1.02846	0.231342	1.81777	1.74157	3.25958	-1.95311	1.59718	-2.98666	0.299638	0.786491	-3.6202	3.2314	0.336778	1.2533	-3.11137	2.35271	1.17143	-4.7967	-0.0504543	1.94007	1.10235	3.75424	-2.22166
PF3D7_0315100.1	3.2575	6.26606	4.67252	5.6761	5.2894	4.95214	4.71231	5.01292	5.53469	5.46097	6.00724	5.72174	5.38791	6.69592	5.98367	4.31661	4.7178	5.48642	4.78137	4.57468	4.18853	5.80915	6.22811	5.02702	5.47168	5.21943	5.20364	5.732	0.450136	5.49221	5.12782	4.71008
PF3D7_0315200.1	5.3088	4.81723	4.83502	7.01299	7.081	8.68014	8.18558	6.82519	7.06984	6.91144	5.05712	4.71967	5.49536	6.31465	8.42408	5.61106	4.1147	4.08705	5.69904	6.87421	3.81708	4.2824	7.55799	5.92281	6.10023	7.46239	9.37064	3.62705	5.40813	3.14553	4.70153	6.4342
PF3D7_0315300.1	7.90486	6.02755	5.78077	4.84391	7.45647	5.55379	8.33493	5.00447	7.20354	6.49414	7.96158	5.30417	5.92083	6.17702	6.57892	8.00497	5.5547	5.96098	5.71917	5.05579	7.40855	5.35431	5.56463	6.40433	5.48686	7.43531	10.701	7.07561	9.67569	7.3037	9.23909	6.68797
PF3D7_0315400.1	3.53377	0.311378	7.78003	4.73661	4.28733	2.1129	2.02582	3.7775	0.268264	1.98292	5.07538	3.66232	3.13865	0.818151	3.89272	2.59269	5.3136	3.47808	2.01321	3.33863	3.04064	4.10651	4.02068	-0.984968	4.48992	3.00354	5.78258	4.43848	1.40332	5.80114	4.71671	5.39959
PF3D7_0315500.1	7.28685	11.7779	4.8082	10.2089	8.53901	6.57759	10.1493	6.97834	10.1444	9.7725	4.91557	7.23884	11.9041	5.29721	11.0935	5.50731	5.58025	8.33717	8.9977	8.80488	6.31517	8.14231	9.39378	10.1766	8.92464	10.7391	5.73626	5.20885	10.6317	4.61161	5.82563	12.7495
PF3D7_0315600.1	6.49844	6.3383	6.26072	8.82994	7.42191	9.73395	7.33396	9.51486	6.53873	7.49648	7.83584	6.21903	6.94771	7.17089	6.21897	8.07965	5.50849	4.37599	5.45291	4.8648	7.3457	6.78822	7.12194	7.81049	7.06626	6.17383	4.28945	6.2004	6.40795	9.96608	6.09472	6.88061
PF3D7_0315700.1	8.25035	5.99699	5.6759	9.66117	7.48767	5.60425	9.26502	5.21443	9.23684	8.93533	4.65171	9.23944	8.64458	11.525	7.45109	9.33272	5.33757	7.34618	6.85136	7.33101	7.55689	5.96286	7.99216	7.41097	7.6332	8.99864	3.76813	7.57389	5.73121	4.16757	5.42778	5.12195
PF3D7_0315800.1	5.86836	7.2009	2.33712	5.51132	5.70252	5.47476	5.58902	6.72659	6.76497	6.43574	6.72954	8.89035	6.51106	6.19367	7.0919	5.39754	4.89877	5.91372	4.81297	5.43514	5.43089	7.71461	5.82535	4.65777	7.83877	5.41475	6.56702	5.55111	3.61882	5.30516	7.8935	5.40119
PF3D7_0315900.1	3.5411	7.35903	0.608213	3.65849	4.48539	3.14512	3.38971	4.26707	3.67797	3.8068	-1.50919	4.28421	3.86204	1.46037	2.79466	4.47804	-0.405938	2.80563	2.04034	-1.33179	2.89812	4.97374	3.16402	3.80374	5.41561	3.59417	2.64739	3.13834	1.20578	-1.8414	6.85622	2.04027
PF3D7_0316000.1	2.37272	3.13877	3.59069	5.22353	3.65435	4.5804	2.93693	3.13554	1.68474	2.57535	4.63524	1.155	3.46562	1.12091	1.07116	4.24813	3.95063	1.6108	1.3539	0.335119	4.61934	3.61033	5.1581	2.53549	1.77141	0.3178	0.921003	4.60489	5.71641	4.45294	2.92577	4.32076
PF3D7_0316100.1	11.4193	16.0156	10.1956	12.5399	10.4926	13.7278	12.6655	10.0195	13.5148	12.1361	13.1088	14.0261	13.8588	13.0318	14.5164	10.8884	15.4202	12.1928	13.7434	14.3503	10.457	12.8726	13.8196	13.1094	12.9032	11.4663	14.6154	12.294	10.1877	12.7441	10.6856	13.4419
PF3D7_0316200.1	10.1012	7.60858	7.13455	10.6157	10.1134	11.5513	10.7243	12.0242	10.1715	11.0132	10.0332	11.8001	11.7996	12.8729	13.8214	10.1197	13.5767	10.7955	11.169	12.4962	7.52828	7.58321	10.6737	11.319	9.92238	10.4048	12.2209	9.74973	10.4097	12.3538	7.49208	10.5474
PF3D7_0316300.2	14.849	20.1362	13.7299	12.284	14.0147	10.7551	13.5576	18.358	12.1735	15.7747	15.5408	14.3869	15.05	13.5643	15.7229	14.7164	19.3526	15.6186	16.4975	17.8314	13.4205	13.5145	16.4243	15.3308	15.2969	12.5438	9.86128	16.8586	12.9832	16.7781	12.1821	18.0947
PF3D7_0316400.1	9.54978	8.26588	14.481	12.6413	11.8054	10.4217	9.66693	13.2569	9.14161	10.9202	10.5535	9.11947	9.98566	10.605	10.0571	10.7041	11.0184	10.1632	9.93439	11.0585	10.3112	10.8346	10.5158	9.82291	10.2632	10.1463	12.9414	9.29588	8.91847	8.87241	8.17396	9.61208
PF3D7_0316500.1	11.1781	6.53946	14.6299	9.18849	7.91148	8.28565	7.79138	8.94357	7.44412	7.64566	10.1667	6.0792	7.80169	6.86524	7.07939	9.13044	10.4407	9.71031	9.02702	10.0632	10.9837	10.3151	9.42942	8.78802	6.68799	7.92421	9.50596	10.5052	11.7065	11.0124	11.2413	10.3451
PF3D7_0316600.1	11.8014	12.4054	12.3726	9.79723	10.5758	12.2045	9.36019	10.3917	8.34212	10.1507	12.1636	10.5427	11.0372	11.5527	9.96208	11.7343	11.8277	11.9323	11.9482	11.786	11.6506	10.8141	12.4313	12.3588	8.74933	10.9985	11.2626	12.0922	11.4844	11.8306	11.4421	10.601
PF3D7_0316700.1	10.6296	12.6205	11.8578	9.80351	8.94241	11.0128	7.08349	9.55431	7.16982	6.89705	11.2205	7.88758	7.83704	9.45647	5.31074	10.6472	12.4049	10.5994	10.0636	10.9802	12.8411	12.5249	10.305	9.39197	7.98159	6.98924	10.2355	10.8612	12.2534	9.92361	11.5407	7.27337
PF3D7_0316800.1	9.28707	9.81705	9.76142	9.98996	9.21657	9.47443	9.63929	9.79318	10.1075	9.56841	9.65806	9.46166	9.51686	9.44183	9.86956	9.73846	9.64234	9.5072	9.54588	9.43718	8.9826	9.22345	9.87719	10.1599	9.62908	9.07318	9.17397	9.56121	8.49182	8.70696	9.28951	9.84907
PF3D7_0316900.1	6.22484	5.6127	5.76298	5.66062	5.73401	5.57656	6.05778	6.03901	6.37136	6.38156	6.14487	6.98656	6.5297	4.55176	6.7668	5.74892	5.21929	5.95462	5.77385	5.89554	5.63624	6.04172	5.96803	6.52149	6.43471	6.37563	4.47305	5.96441	6.41755	5.96216	6.92679	7.52574
PF3D7_0317000.1	7.83244	9.40537	11.5969	6.14211	5.48032	6.21275	5.44694	4.46364	4.93866	5.19608	7.62398	4.83798	4.61588	1.89805	3.65818	7.63408	7.69264	7.73483	7.10468	6.57678	8.95371	8.34629	7.82751	6.27287	5.52498	4.95715	5.66988	7.64017	9.83428	7.39782	9.1503	9.10143
PF3D7_0317100.1	6.09559	10.8628	5.95643	8.35317	4.83985	7.39753	7.07793	3.3836	4.93558	5.70075	6.15001	4.04732	5.4045	7.35361	6.13332	6.15435	8.69329	6.67554	8.9647	7.14274	5.73514	5.71262	7.7842	6.42058	6.16651	7.43108	8.11167	5.14602	6.26829	5.8931	4.8195	6.40952
PF3D7_0317200.1	8.60972	9.92992	9.00262	6.79369	7.99055	9.03827	8.37377	9.36811	7.79736	8.19095	8.39599	6.25981	7.59375	7.61692	9.49601	9.73723	10.7873	9.62855	10.176	11.4941	7.6975	7.87172	9.1279	10.1382	7.85942	8.76053	11.7842	8.22551	10.5577	10.3069	12.2569	9.37386
PF3D7_0317300.1	7.26566	7.06204	5.09539	6.25398	6.8281	6.84927	7.51303	7.55873	7.53472	7.57563	6.8839	7.90162	8.17749	7.23707	8.44687	6.93037	6.80261	6.87401	7.15072	7.59849	6.359	6.87873	6.94642	7.13028	7.657	7.53815	7.7713	6.92065	7.28306	7.02134	7.55929	7.47605
PF3D7_0317400.1	9.18336	5.14633	5.50929	8.87134	6.69902	8.53688	7.22036	8.26043	8.64119	7.83331	8.86008	9.39446	8.85423	12.4955	6.02822	9.16798	11.0292	7.79137	7.71293	8.31853	10.3358	8.3062	5.69426	7.50186	6.90207	8.00906	8.79571	8.63837	12.2725	8.41469	3.84986	3.74366
PF3D7_0317500.1	5.70196	5.76083	5.06251	6.25035	6.79061	5.88717	6.47328	6.56605	5.60899	5.91675	5.53116	5.99637	6.43531	5.80693	6.5598	5.61423	3.94232	5.58582	6.15444	5.38024	5.59208	5.64455	6.23763	5.68918	6.18571	6.53062	5.72859	5.32998	5.74727	5.52598	5.65885	6.40092
PF3D7_0317600.1	7.14827	8.00141	8.32974	8.40894	8.26335	7.94214	8.05402	7.88913	8.26873	7.82341	7.93211	7.59405	7.94473	8.28087	7.40571	8.60376	8.01237	8.39868	8.19186	7.76006	8.28547	8.01455	8.36025	7.70376	8.25452	7.09308	7.23894	8.00126	7.71735	7.63666	8.38892	7.44245
PF3D7_0317700.1	5.63896	7.08195	5.89023	6.29899	6.61965	6.86456	6.90992	6.74453	6.51904	6.27007	5.93275	5.37992	6.7382	6.7261	6.91421	5.63649	7.1978	7.46126	7.4783	7.67701	6.27348	6.47494	6.59666	6.49522	7.00237	6.7122	6.32215	6.39494	7.26055	7.04537	6.94008	6.76279
PF3D7_0317800.1	5.3146	9.93038	2.19316	7.03997	5.01459	5.85194	5.48507	5.95876	2.50561	4.73592	5.50776	4.17049	3.77927	7.89653	6.83224	5.24587	8.45304	7.3491	7.49616	7.79066	3.66214	5.25529	7.38581	6.39924	5.93442	5.30808	6.12183	5.72112	2.44359	7.78829	9.40531	4.93565
PF3D7_0317900.1	11.5516	8.50376	8.50386	7.32399	8.96732	6.89225	9.39228	12.6295	8.26347	9.88701	12.0074	8.47886	9.35706	8.36264	10.8137	12.4012	6.68277	10.4227	10.121	10.8845	10.5527	9.226	11.6087	9.72888	7.39538	10.2558	11.9144	12.0368	13.889	10.3486	13.8008	12.1001
PF3D7_0318000.1	18.9517	18.0632	17.5114	14.2864	13.7851	16.0356	16.7482	14.5557	18.7037	17.4436	14.6318	22.294	20.1618	17.4911	19.7593	15.9823	23.0033	19.6932	18.2862	19.3762	15.8895	19.7278	18.2066	18.0073	17.3507	19.1616	20.314	20.5682	16.8436	13.2477	16.6055	17.6311
PF3D7_0318100.1	2.99729	-0.480544	-0.0300072	4.78199	4.67911	6.33924	2.75987	-1.81497	3.27766	3.28136	3.3235	6.20011	4.01292	7.90415	2.96045	4.40554	-0.618301	4.03226	4.07418	5.07901	5.54034	3.8916	5.8662	-1.03329	2.64543	4.29658	5.16611	3.42747	6.00196	4.88958	5.92244	-0.0556972
PF3D7_0318200.1	7.72012	7.30001	8.34416	7.20086	7.35646	7.8044	7.56674	7.8315	7.40632	7.9202	7.77383	7.42034	8.0346	7.75715	7.79856	7.52827	7.67798	8.2314	8.60558	8.32113	7.79747	7.84761	8.15647	7.97656	7.28887	7.70299	7.60285	7.55631	8.20991	7.53629	7.69154	7.92215
PF3D7_0318300.1	5.79135	5.28132	5.47576	5.07531	5.0695	5.46927	5.92986	5.61834	6.00461	5.8045	5.69157	5.73674	6.1807	4.63389	6.32289	5.0759	4.0781	5.89841	5.65654	5.73187	5.28589	5.59749	5.76118	5.59626	5.78159	5.22225	5.39453	5.35689	5.59132	5.32374	6.07514	6.7885
PF3D7_0318400.1	7.10554	5.47046	5.43977	6.42356	3.45631	4.45862	5.89902	3.27666	5.49478	6.43294	7.10889	8.09971	7.3988	6.13976	6.1833	4.88172	4.85956	6.31005	5.80326	9.16157	6.04519	5.99116	6.88362	5.79764	5.63459	4.72852	2.21298	7.00628	5.76939	3.31957	4.91879	7.03094
PF3D7_0318500.1	6.45848	8.40865	8.15346	5.12387	6.61736	6.15787	6.57388	6.89273	6.09932	6.76659	6.18914	8.57823	6.68357	3.59442	7.28083	8.13591	7.83037	6.31939	6.45817	6.41794	5.90128	6.11511	6.66652	6.81497	6.72393	6.40184	8.99675	6.53021	7.38322	7.30006	4.24405	8.78524
PF3D7_0318600.1	5.99334	6.33287	1.74178	6.20839	5.8318	6.02267	5.42133	7.18083	6.09379	6.36105	5.41906	8.04347	6.72798	3.36954	7.95906	5.25206	5.88937	6.07063	5.48697	5.566	5.09904	6.98862	6.36308	5.71007	6.43885	6.03292	6.83319	5.55094	9.20859	6.56771	6.94596	8.32074
PF3D7_0318700.1	3.20085	1.03927	1.31826	-0.527668	3.52719	4.65732	4.16487	5.10372	4.77669	3.85655	5.13016	4.93131	2.2263	2.51185	2.51937	2.8638	1.08965	4.03626	2.64121	0.0895415	5.59008	3.78901	0.118778	0.0759774	4.39006	2.6469	6.22646	3.21123	7.80309	6.2018	1.06643	2.89232
PF3D7_0318800.1	7.72956	12.5027	6.78025	8.39116	6.11591	8.77349	7.0403	4.55668	8.20083	7.20427	8.91769	9.14117	7.86706	8.61892	7.19797	6.82544	10.3921	8.05701	7.34024	8.87626	8.25283	9.41529	7.58814	7.70073	7.87227	7.72769	10.0324	8.26846	6.82448	9.1307	5.82873	7.30778
PF3D7_0318900.1	8.28789	9.95236	9.45079	7.91425	7.62165	7.73895	6.41454	8.72017	7.17087	7.4012	7.97222	7.51565	6.67138	4.12235	8.41936	7.97209	8.05359	8.04877	7.85572	8.1561	7.29691	8.45051	8.78685	8.20941	8.00222	8.55582	8.51896	7.93725	8.36946	8.19326	9.58508	10.7822
PF3D7_0319000.1	9.51522	6.83631	12.7013	10.1064	9.55189	10.5562	9.40149	9.34368	9.2449	10.1214	9.99372	10.0589	9.22497	8.79208	9.99401	9.79967	10.4893	9.26687	9.91142	10.479	9.24651	8.64455	9.30096	10.3383	8.73955	10.048	10.8968	9.28487	10.8511	9.91544	7.54319	10.4965
PF3D7_0319100.1	6.87254	2.18161	10.0271	7.15542	4.39434	7.04816	8.12969	7.02467	7.32336	7.20036	7.30564	7.58596	4.69122	3.7549	7.34086	5.44039	7.30012	5.95112	5.36844	5.73453	5.46611	7.56345	8.463	6.19004	7.48708	6.05183	0.644345	6.62598	4.04447	5.57249	8.39151	9.29277
PF3D7_0319200.1	5.68441	6.33394	5.18454	5.43166	5.56703	5.09705	6.10118	5.82872	4.95569	6.22299	5.33239	5.30504	5.56084	6.04182	5.78485	5.45178	5.63703	6.18942	5.79474	5.87448	5.28781	5.64848	5.27727	6.11336	5.84246	5.25347	5.71725	5.05304	4.75798	5.60447	6.53449	5.23352
PF3D7_0319300.1	1.91184	1.38689	1.78454	1.45367	2.38601	2.34017	2.37825	0.292226	2.10925	2.5434	1.89693	2.69372	2.47352	3.24996	1.03757	2.0982	2.97454	2.9269	2.7193	2.73537	1.98527	1.3463	2.5454	3.85324	2.65774	2.07831	-3.12781	1.97211	2.20697	-4.92827	4.99064	-0.268792
PF3D7_0319400.1	11.0036	10.3282	13.8667	10.927	10.6884	11.1867	11.8686	10.9813	11.8087	11.0234	11.4316	10.6571	11.4531	11.0737	9.39676	11.1043	8.47639	10.2048	10.7114	10.9065	12.8061	12.7107	11.253	10.5333	10.7249	10.8955	9.36885	10.0993	10.4649	11.2695	9.40933	10.7337
PF3D7_0319500.1	6.13151	7.47276	5.93422	8.42043	7.85795	7.93987	8.87188	7.91544	7.94339	8.03818	6.15834	7.10252	7.45301	8.79338	8.04713	6.54012	6.61339	7.39212	7.62368	7.78918	6.91182	7.6792	7.74225	7.37536	8.09061	7.61765	6.43457	6.69318	6.25036	7.79044	6.66712	6.96652
PF3D7_0319600.1	7.42397	9.16416	8.32896	7.62465	7.15008	6.5514	7.92594	7.59474	7.80297	7.36833	7.12091	6.76372	6.76791	7.68133	7.38067	7.85742	8.74168	8.15839	8.06542	7.80865	7.32041	7.42284	8.34234	7.53798	7.50153	6.74149	6.71258	7.80472	5.99355	8.20662	6.81472	7.98911
PF3D7_0319700.1	5.97277	5.0195	4.25458	5.48626	6.21229	5.79055	6.10058	5.79331	6.15257	6.21285	6.06274	7.10624	6.84797	6.33539	6.98864	5.62802	5.92709	5.95058	5.68327	5.84246	5.2254	5.63942	6.18666	5.84435	6.16386	6.44076	5.71855	5.53427	5.79175	5.199	6.5959	5.85751
PF3D7_0319800.1	7.71264	3.19988	9.23471	5.12552	7.55179	6.55425	6.97893	6.96085	7.10333	6.84142	6.9099	8.819	7.5946	4.98068	6.13539	7.87926	3.45619	7.16466	7.24467	7.9441	8.95147	8.87002	6.82164	6.05854	7.10275	6.47309	6.42184	7.03156	10.2061	5.95701	10.9164	7.07642
PF3D7_0319900.1	5.8793	7.88857	2.45359	4.82064	4.04642	6.31477	4.69825	7.60167	5.67595	4.9688	5.93012	6.5239	5.82473	5.47711	7.96777	5.02706	9.00819	6.74979	5.88873	6.6853	3.19553	6.11722	5.30587	6.99271	7.43572	4.71812	7.3843	6.01596	3.14265	6.13354	10.0935	5.75243
PF3D7_0320000.1	12.9931	19.4776	12.1962	9.88173	13.616	10.0846	12.9236	16.7466	15.2911	13.2288	13.8744	12.0159	9.70344	14.0217	12.1743	14.6162	16.9712	14.8461	14.909	13.8505	13.2992	12.6608	15.0993	14.2064	13.8101	14.0608	8.65175	14.2456	11.7545	8.30226	11.8072	12.6588
PF3D7_0320100.1	9.29283	4.33343	9.57717	8.65027	9.02407	3.57219	8.75959	9.02627	8.91055	8.70612	10.0182	8.21027	8.85364	12.4439	7.81535	9.7983	12.3816	10.3993	10.3855	11.2438	10.9726	10.8957	9.39627	7.47932	7.32726	8.92731	7.59645	10.1439	10.8587	10.4118	12.2831	6.41627
PF3D7_0320200.1	19.5674	20.4042	20.6257	22.3507	18.1657	20.2862	21.0645	21.8259	20.4036	21.2272	21.5595	18.1888	20.505	20.1422	20.2154	20.5933	21.2421	19.0048	20.054	20.708	19.6491	19.9023	21.4226	20.5307	20.5908	19.9406	19.408	19.9873	20.3679	14.6087	17.5149	20.5965
PF3D7_0320300.1	7.26334	8.57876	6.68202	7.94607	8.12015	7.41097	7.1188	6.89441	6.24459	8.28142	7.37597	7.32444	7.11127	6.54635	6.91298	7.87525	7.34988	7.71882	8.1654	7.42795	8.00541	7.47069	7.96493	7.67482	7.09462	6.88093	7.03624	7.33055	9.97577	6.91777	8.04241	7.90565
PF3D7_0320500.1	13.3866	10.5737	17.1055	14.0069	16.3647	16.1686	12.9138	14.1504	11.2013	14.7615	14.7197	15.9664	14.9297	10.9834	11.1565	14.6484	7.82384	10.201	9.50933	10.3377	16.5599	14.9553	12.2128	12.9462	12.1961	15.7384	15.2709	13.711	17.2333	13.0126	9.57866	13.5195
PF3D7_0320600.1	10.2262	10.0303	10.0793	12.3229	11.8911	8.39342	11.5612	15.556	10.344	11.0784	12.7465	10.5078	11.8224	11.6556	10.0272	10.9326	8.42453	10.1526	10.085	7.13143	11.728	12.4677	11.1293	12.5579	10.258	10.6747	7.47048	11.5348	9.76273	6.80343	9.83289	10.1543
PF3D7_0320700.1	13.8913	12.7907	20.8085	11.3955	14.7305	12.1631	13.9441	11.8963	13.8965	13.8913	13.8027	12.2715	13.9717	12.7751	13.0961	14.1563	19.4316	14.2416	13.2262	14.4395	14.0659	15.7947	13.1586	14.981	13.4838	14.7315	15.9759	13.8138	11.6785	16.8084	19.2929	13.3292
PF3D7_0320800.1	8.70499	5.37141	13.6495	8.65116	7.6414	10.5391	7.21241	4.0356	8.48787	8.17929	9.15261	7.25821	7.91786	4.76795	6.14562	7.42485	10.316	7.84771	7.22607	7.79131	9.73539	9.60637	7.18804	7.49588	8.3349	6.45118	8.17039	7.81594	10.6832	9.69682	11.9108	8.967
PF3D7_0320900.1	5.30141	8.46644	5.55608	7.53515	7.37205	7.68385	8.76597	6.66396	8.23683	7.13716	6.63684	7.35495	7.55753	6.82778	7.11268	6.02124	7.44927	7.75868	6.92243	7.36904	7.66571	8.17186	7.81243	7.01056	7.20674	6.43581	6.32234	7.69164	9.14318	7.16947	4.77254	7.97331
PF3D7_0321000.1	10.0948	8.25099	8.52748	8.93763	9.76881	9.09412	10.8055	10.5311	9.47551	9.48795	9.03551	10.0116	10.1778	12.1897	11.0273	9.629	9.54228	10.0672	10.6854	10.8057	9.0509	9.73581	10.2632	9.34389	9.52121	10.2703	11.2051	9.79607	8.1871	10.4535	10.7184	8.56453
PF3D7_0321100.1	4.01291	2.62145	4.38287	3.65829	1.63958	3.94404	3.24813	2.43978	3.56712	1.84666	4.22319	3.53737	3.60106	3.2167	3.60948	3.10757	5.40944	3.37652	3.12614	2.57927	2.90644	3.06836	3.3742	3.73992	2.87401	3.60227	3.60913	4.63268	2.76012	4.2446	2.72064	4.01174
PF3D7_0321200.1	8.00406	11.5741	5.40858	4.75023	4.06326	5.22178	6.13173	4.96352	6.90009	7.37464	4.23456	5.29417	7.61318	5.82302	5.88584	8.86041	5.09141	7.51174	7.00296	4.6485	6.81006	7.19735	6.90292	6.8309	7.0923	6.1222	8.40533	7.65899	5.60148	3.83944	10.3513	5.98474
PF3D7_0321300.1	12.0926	10.085	9.67639	8.6288	8.52223	9.60248	10.0524	8.68946	10.4785	10.3346	10.9589	11.4787	10.2918	9.9264	8.70041	9.62164	8.57311	10.9955	10.2268	8.63597	12.8145	12.3819	10.0247	9.42142	8.81184	11.6642	10.5206	11.9545	14.3359	7.60209	9.23052	9.96405
PF3D7_0321500.1	10.8674	12.7014	12.0997	13.764	14.4692	12.1611	13.1212	12.2392	12.4763	13.3636	12.8954	12.6624	14.8191	12.8396	12.4315	13.1275	11.6251	12.3372	12.1937	15.3601	13.5366	13.0189	13.4652	14.0378	12.195	14.2984	9.83275	11.5672	15.7485	12.2783	12.484	13.041
PF3D7_0321600.1	11.1292	9.53284	10.2998	11.3362	11.9088	11.2099	9.61962	11.8075	8.85383	10.7416	12.2739	13.551	8.98337	9.60957	11.4367	10.6302	9.60271	10.4105	10.0923	11.0697	10.5676	11.7491	11.4516	10.0897	10.4258	10.5315	11.774	10.4124	10.5332	12.3593	12.4282	11.443
PF3D7_0321700.1	5.56484	7.34197	5.89764	5.74323	5.89136	6.57907	7.23602	6.82465	7.54821	7.07113	4.3896	7.20044	6.75822	3.84437	8.55303	5.33327	1.94795	4.45501	4.23778	5.69317	3.8734	5.14086	6.03084	6.08742	6.75156	7.16208	8.44273	4.70916	3.04543	5.5795	2.16704	8.76942
PF3D7_0321800.1	6.34278	6.51024	5.9817	5.45498	5.90895	5.7747	6.43438	6.26014	6.27887	6.7114	6.19437	6.92799	7.20942	5.30375	7.08278	6.05044	6.48066	6.47254	6.51148	6.80158	5.90884	6.24058	6.13344	6.02729	6.98736	6.60567	6.28416	6.11422	6.89339	6.30665	6.34533	7.40107
PF3D7_0321900.1	6.95654	6.63468	6.89429	4.64539	5.29846	6.23274	6.14058	6.50901	6.57469	6.58626	7.06935	6.23816	6.22488	6.61058	6.29629	6.89565	6.70032	6.72207	6.80456	6.58704	6.50243	6.2828	6.41955	6.67168	6.27187	6.57432	6.29176	6.85684	5.9512	6.39491	7.30704	6.23163
PF3D7_0322000.1	8.3046	8.3129	8.58709	8.96857	8.75088	8.83996	9.76745	8.31792	9.39331	9.39811	7.97383	8.10979	8.47656	8.77122	8.29298	8.47635	7.65714	8.30931	8.09958	7.92304	8.79065	8.4284	8.66545	7.96716	9.09703	7.90993	7.43008	8.11463	8.1142	8.10077	7.75045	8.47368
PF3D7_0322100.1	6.81261	8.35937	7.41658	5.38463	5.86237	6.28394	6.03762	6.90949	6.17952	6.53801	6.66176	7.4374	6.19871	2.51399	7.08661	6.65109	7.52675	6.72537	6.669	7.47028	6.31684	8.19146	7.23683	6.7838	7.19012	6.12529	7.04076	6.2265	8.21011	6.81228	9.15214	9.20058
PF3D7_0322200.1	11.8581	10.6491	10.4229	12.1796	9.40752	9.31229	10.3772	8.76728	11.0534	11.2453	10.8763	12.3762	11.438	10.9724	11.3603	11.8539	9.18694	9.2604	11.2785	11.0753	10.4441	10.4725	11.3032	9.88618	10.7645	11.0942	12.7104	11.2752	10.2761	7.48154	9.9005	10.872
PF3D7_0322300.1	5.70259	6.28488	8.01409	3.23939	4.71541	5.71151	4.833	4.53414	5.40144	4.43159	5.53366	4.27759	3.77556	1.92446	3.92573	6.03053	5.78077	5.27591	5.19681	4.64791	5.80883	5.31543	5.1149	5.69448	5.13639	4.61851	4.44162	5.19015	6.5885	5.45513	7.424	6.51578
PF3D7_0322400.1	10.9076	11.0332	14.0955	11.266	10.8897	11.0592	11.1292	10.9535	10.6807	10.5272	10.9689	5.70513	10.1639	10.9882	11.6837	9.95473	12.4868	12.2528	12.6496	12.4651	10.3722	9.78919	11.9231	11.2983	9.88462	12.2171	13.1179	11.0448	10.9129	13.1615	12.052	12.6088
PF3D7_0322500.1	6.13216	11.7876	5.53665	4.2513	8.69141	4.45553	5.87712	4.86933	6.67222	6.11664	3.33102	5.45174	4.23598	6.61227	5.66006	7.60427	4.63212	6.91355	7.53553	7.00638	7.19278	6.1891	7.43853	3.0304	6.37437	7.77147	9.60494	5.7276	5.6836	9.34316	5.26861	6.04812
PF3D7_0322600.1	6.47892	6.14158	6.31439	8.2201	6.81272	7.32318	6.64278	4.90796	6.86701	6.98216	7.49987	5.47794	7.2347	7.23387	6.70257	7.01984	4.8483	5.76456	5.61256	6.00017	6.86551	5.49382	7.51331	2.89105	7.72249	7.5146	9.29842	6.79396	6.48135	3.68218	5.60273	6.27962
PF3D7_0322700.1	5.30182	3.47222	3.17611	4.56232	4.5362	3.93161	4.67588	4.60948	4.71149	4.96358	4.8567	5.43984	5.17331	4.25521	5.60707	4.57763	4.61832	5.15475	4.62532	4.53803	4.26033	4.1766	4.66646	4.62792	4.57856	4.88412	4.25559	4.36768	5.99503	4.69305	5.50711	5.46173
PF3D7_0322800.1	15.2365	14.9255	14.7752	16.5154	16.9714	12.6654	16.3733	11.9224	16.133	14.9807	16.2171	12.5208	15.9797	16.4044	15.4033	12.1969	20.6354	16.0826	15.4339	11.6417	14.5216	13.0229	15.8909	15.874	14.2688	15.5867	9.3101	16.6728	14.3147	16.4859	14.1819	16.7919
PF3D7_0322900.1	8.4231	9.57834	10.3943	9.87558	9.73582	9.83878	9.56326	9.30292	9.53067	9.56731	9.02017	9.27741	9.36714	9.16135	9.42187	9.2748	9.66282	9.99061	10.0093	9.55475	9.33553	9.32096	9.78252	9.55131	9.69097	8.97277	8.86289	9.63048	9.26466	9.56256	8.71884	9.88711
PF3D7_0323000.1	5.37801	8.51005	8.76884	4.57662	5.3585	5.93799	5.16941	5.09781	4.32198	4.40967	7.21285	4.65425	5.34671	1.17215	4.71295	5.31396	8.717	6.72945	5.73198	6.37457	6.39087	6.37887	6.60156	6.37941	5.10371	3.30112	4.65221	7.15958	8.2443	8.20834	6.1376	9.35054
PF3D7_0323100.1	10.8467	11.0011	9.57374	8.60596	9.80949	9.77715	9.46745	8.45763	8.56539	8.69265	11.2815	11.2788	8.08408	10.4674	10.7305	10.6839	11.7336	11.8882	12.3207	11.777	9.43607	8.85691	11.1648	11.2475	8.60322	9.45095	11.0792	11.413	10.447	11.8046	12.7195	10.4885
PF3D7_0323200.1	10.5934	10.4629	18.2859	8.96656	10.7831	13.1487	11.4707	9.82217	11.2648	10.7393	12.5352	10.4544	8.91536	11.5335	10.2801	12.7872	16.6147	12.6415	13.2708	13.3198	11.3578	10.0866	11.7133	11.3694	10.7615	10.0546	13.6083	11.1782	10.0541	14.1944	10.1872	10.8286
PF3D7_0323300.1	10.6482	10.4567	10.2666	12.8779	12.2039	9.11436	10.0876	8.72285	10.7688	10.2003	7.83832	9.18592	10.6941	11.1763	10.8883	8.5923	9.13013	11.6236	11.62	8.24141	10.7343	11.4343	11.6364	9.84599	8.60701	10.5485	12.0694	11.2756	10.1104	12.6064	9.89119	11.22
PF3D7_0323400.1	5.67688	4.78194	5.02091	8.82192	5.63104	6.56605	5.72787	7.01565	6.43749	7.09317	6.87621	8.45156	5.44849	5.73674	6.47451	6.50458	3.84029	4.46396	4.87569	3.04718	5.81157	6.96482	5.52762	6.32083	5.94807	5.9327	7.82102	5.7959	5.33803	4.99678	4.00051	6.01617
PF3D7_0323500.1	5.37149	8.12155	-0.620245	7.50228	6.41966	7.04293	6.96394	7.26221	6.81533	7.06346	5.98421	7.49942	6.71931	6.94757	8.1217	5.38477	6.17699	6.00805	5.18941	5.89629	4.9528	6.29004	6.81768	5.66913	7.47384	6.18293	6.16859	5.40911	6.78929	6.07937	6.06336	6.43483
PF3D7_0323600.1	4.497	5.53653	-0.966987	4.95355	3.81348	4.63089	4.17772	5.28793	4.44507	5.20331	4.23577	5.11083	4.45895	7.26468	8.13493	4.0259	6.02965	4.83769	4.34302	4.89109	0.757807	2.34158	5.98145	5.68793	4.40841	4.68149	5.42303	4.77732	-0.259783	5.60996	6.15469	4.36419
PF3D7_0323700.1	6.62251	7.37884	6.11963	6.62768	6.97789	7.86402	8.09401	7.59026	8.53122	8.27735	6.30454	7.29002	7.37935	8.313	7.20112	7.04332	6.77917	6.80442	6.94726	7.72801	7.44035	7.81038	6.52382	6.81581	8.08141	7.55446	7.87783	6.6576	7.25086	6.41086	6.41171	5.94332
PF3D7_0323800.1	6.1989	7.65061	1.51888	4.39431	4.71198	5.12234	5.46386	6.25634	5.88077	5.54066	5.80859	5.74665	5.05583	2.91727	7.52701	4.87221	6.60002	6.29554	6.24467	6.31858	4.40643	5.279	6.55854	6.01393	5.47898	4.69951	5.41338	5.54607	8.53994	7.19217	7.49711	8.80276
PF3D7_0323900.1	5.72359	4.33742	4.09357	0.885665	2.57312	1.30197	5.79762	1.66305	6.74542	6.11195	0.89599	2.41737	4.2972	5.68688	4.00582	6.26702	2.03928	4.65497	5.92989	1.05284	4.19177	1.71218	6.15987	6.72198	0.846058	6.4115	0.590283	6.04585	4.54092	1.04933	2.89315	4.36894
PF3D7_0324000.1	2.22893	-1.01635	-0.503948	2.68579	-2.70832	-2.34555	0.293698	-2.93745	-0.241909	-1.66791	1.40805	4.01172	1.39973	2.15133	0.531859	2.11523	-1.39938	0.441252	0.0585472	1.12233	1.06523	0.903486	2.12122	-2.17145	-0.524131	2.68313	0.940055	2.13613	0.241668	-2.23733	-1.53526	0.0842555
PF3D7_0324200.1	5.29923	-0.247917	0.0479055	5.77744	4.84044	7.14608	3.80383	5.61051	6.12972	5.14086	5.95198	8.05056	6.1519	7.48924	7.05313	6.05661	7.68403	5.34274	4.1067	4.17936	3.71419	3.55602	5.17328	6.26234	4.3447	6.11813	3.71148	4.73406	7.28688	6.80046	7.23166	3.59806
PF3D7_0324300.1	6.37145	7.68998	-0.041136	7.76233	5.67504	6.7528	4.99788	7.40458	6.39847	6.71279	6.94018	9.5824	8.0052	4.03043	7.30628	7.29577	0.965524	6.41192	6.8203	6.57331	6.08425	7.35957	5.61453	6.58025	7.34242	-2.34208	8.92832	5.6942	7.99621	6.38281	10.3769	7.01866
PF3D7_0324400.1	1.30173	0.297185	0.909537	-1.16828	3.77826	-1.26858	1.44816	-0.640437	1.15067	2.70964	-1.51847	5.4235	1.91107	1.85503	1.13549	-1.80582	-0.745744	-0.119552	1.55023	2.35007	1.7218	3.13137	-0.3009	3.94803	-0.471181	3.19422	-1.3284	2.81664	1.53511	-1.20735	-0.197776	0.171385
PF3D7_0324800.1	-1.09466	-4.91693	-3.85473	0.748173	-1.0114	0.388273	-2.93253	-5.19146	-3.73766	-2.56406	-1.31955	-4.25376	-0.373853	-1.90279	-4.49571	-2.86561	1.86778	-3.72604	-3.19654	-6.2831	-1.32543	-5.01197	-2.97057	-3.61315	-2.62404	-2.95166	-4.98906	-2.91912	3.17511	-5.64267	-4.85417	-3.77193
PF3D7_0324900.1	7.49769	10.5427	4.75002	6.3427	5.64225	3.5758	5.59303	5.49383	2.90607	4.76816	7.95619	4.94522	2.65676	6.58281	3.69716	8.36898	8.31913	7.42092	7.96159	7.30039	8.28361	7.06779	6.54651	6.01383	5.30407	5.77488	6.1564	7.89739	9.13129	7.76875	10.4055	5.20433
PF3D7_0400100.1	5.20507	8.2603	6.37659	7.08751	6.32236	6.2607	6.58411	8.56412	2.29949	5.47116	5.59911	2.35133	5.57403	6.2214	5.89968	6.12763	9.41355	8.47557	8.89735	6.63335	6.56383	7.68627	7.42821	7.29743	5.56842	7.25521	8.3613	7.38061	9.37433	6.58234	9.40679	6.25113
PF3D7_0400200.1	1.45255	-3.58816	-2.80997	-3.31845	-1.82404	-5.16641	1.66486	-3.26173	-3.19485	0.00346582	-5.11404	3.25325	-1.7107	-4.35765	0.0917651	2.05613	-5.42799	0.339966	-0.464845	0.156374	-1.66161	-3.73068	-1.99654	-2.7526	0.880591	0.236878	-4.13904	-1.40325	3.10897	-4.26963	2.88038	0.759051
PF3D7_0400300.1	-2.72264	-0.694958	0.079585	-1.8583	2.71755	2.16664	0.192036	-1.27924	-1.39846	2.56633	-2.57351	-0.574852	3.84857	0.852395	0.0711877	0.793271	-2.11913	0.503271	0.352564	-2.69257	0.0152169	-0.0539778	1.89694	-1.38095	-0.775488	0.974486	3.60959	-2.53139	0.820663	-2.06361	-1.34684	-1.90133
PF3D7_0400400.1	11.313	9.06649	10.2561	8.12894	5.89006	5.98909	10.7619	7.67825	6.33632	7.46555	11.1914	4.77634	8.30522	10.4272	7.51231	11.6454	9.64349	8.86332	9.45815	10.5694	10.1218	7.42476	9.64479	8.83154	6.80341	10.4389	10.3091	10.8792	11.0584	7.34947	11.1055	8.302
PF3D7_0400700.1	4.21405	4.89837	5.6357	10.294	8.16116	2.22382	8.76255	4.50891	5.54881	7.81767	6.99628	5.33225	3.14602	5.54845	7.08635	7.1808	1.87388	4.63529	5.71081	0.950465	4.79179	4.71379	8.5245	7.75253	2.32316	8.38161	7.91076	4.52489	5.74931	2.14586	3.56936	7.71265
PF3D7_0400900.1	1.20938	-0.674324	6.15717	3.51051	2.76234	3.85233	2.6239	-0.439339	2.27712	2.4408	1.89988	0.201437	-0.979802	0.76129	-0.513127	3.17979	-1.04438	-2.06787	0.503695	-1.62647	2.04069	0.0978869	-0.16538	-0.438809	2.54718	2.27481	4.93433	-1.88786	0.328994	-1.56172	-0.668398	-0.448662
PF3D7_0401400.1	-0.654425	1.16492	1.64	0.142556	2.05933	5.6275	4.06544	0.513593	0.588964	3.28219	3.52669	1.05107	0.0928155	2.05751	1.74918	2.55544	-0.160827	2.01311	0.4442	-0.545261	1.23554	-0.563377	0.306785	-0.191137	2.93864	3.18071	7.94625	-0.375559	2.28323	-0.283275	0.464171	-0.0644009
PF3D7_0401500.1	11.9844	10.3975	10.5018	16.928	19.121	9.19964	14.0462	11.5152	14.9078	16.1671	10.7126	17.3223	9.84487	13.8949	15.3655	11.4	8.97914	11.4299	12.675	7.68732	10.9267	12.2803	12.94	15.0816	10.9566	14.2575	15.2939	12.7385	10.3831	7.37632	11.0245	12.529
PF3D7_0401600.1	7.57992	10.2788	10.196	8.57858	8.22499	4.95733	6.9637	8.41762	6.99545	6.9853	8.78541	7.25381	6.22556	3.20211	7.82846	8.14261	9.85395	8.50533	8.41701	9.19084	8.15079	9.29091	7.99883	8.34254	8.53849	7.82109	7.3405	8.9345	10.0686	9.59045	11.427	11.6196
PF3D7_0401600.2	11.8323	9.08861	15.523	12.0503	13.2998	13.2652	12.1586	12.9434	11.8439	11.8503	3.10334	13.8446	11.1626	9.10936	10.2449	11.0662	14.2559	11.8167	13.2382	12.5562	10.6877	13.3516	11.8493	11.8509	11.5851	11.8568	10.8107	3.92227	14.4821	2.76412	4.96228	9.05233
PF3D7_0401700.1	9.75569	6.95374	6.98733	13.3862	11.163	9.77679	11.2801	6.1648	11.1357	10.5418	9.08667	12.736	8.60209	14.8593	9.10312	9.93665	5.81488	7.84303	9.21805	4.65051	10.3981	9.05126	8.67811	9.30775	8.55286	10.491	9.78108	10.1504	6.7277	10.5712	6.5042	6.1849
PF3D7_0401800.1	8.13413	8.26329	8.2105	10.6277	12.8039	11.1644	10.296	11.5818	10.4023	10.2184	8.4866	10.8359	11.5493	8.63083	11.5231	8.74252	7.94462	5.8346	6.92064	9.26499	7.39594	8.88295	10.4313	11.6971	9.15339	11.2537	10.4888	8.59831	8.96327	3.60338	7.02897	9.73424
PF3D7_0401900.1	2.39202	3.97558	2.67611	5.08548	5.67736	5.3708	6.16464	3.56429	3.63497	5.4954	2.49212	4.7221	5.10337	4.59358	5.35727	3.28274	4.22257	4.08324	4.52223	3.16938	3.28643	3.60404	5.06641	4.36045	4.69177	4.75147	3.82714	4.62224	4.71301	3.09957	2.6773	4.62709
PF3D7_0402000.1	8.40683	9.51282	10.5528	12.199	14.4401	11.1214	10.5168	10.8662	9.3927	12.3853	8.15444	9.609	10.5555	8.77645	11.5992	8.95759	10.4672	7.6028	8.4796	8.93022	7.94606	9.08551	9.51314	12.7114	10.0952	11.2797	11.2486	8.45873	9.10412	8.8775	10.048	10.6357
PF3D7_0402100.1	6.57695	8.11844	8.19875	5.7477	6.04921	5.98427	6.22879	4.64209	5.77762	4.85626	7.15484	5.70564	5.6337	6.06535	3.64541	7.16753	6.4912	7.19578	6.56151	6.49501	8.46739	7.49356	6.28409	6.11396	5.99297	5.74992	4.60634	6.54042	7.39354	6.70177	7.56586	5.41042
PF3D7_0402200.1	6.10835	5.30593	5.62659	6.81823	5.88018	10.9357	6.90679	8.5527	8.70777	6.7655	5.87315	7.24774	8.07272	6.67554	6.76614	6.66068	3.74717	6.09707	5.5913	6.4233	6.75141	7.05894	5.66235	6.35588	9.49551	7.13693	5.23927	5.56336	6.65858	4.25317	7.51617	5.5021
PF3D7_0402300.1	3.37979	4.06156	2.71082	2.99707	2.6289	2.99877	3.73367	2.71189	3.76555	3.0189	2.33173	3.08625	3.17692	0.290381	4.9997	2.29043	4.81992	2.71175	2.65147	3.11702	1.3515	2.90123	3.77727	3.85512	2.95142	2.94924	4.10922	2.41413	3.38235	4.65825	3.34975	6.15136
PF3D7_0402400.1	6.67357	6.54801	7.23581	7.44392	7.89713	7.56358	7.64751	6.91537	7.61551	7.80409	6.71078	7.81954	7.61948	6.3878	6.92503	6.68793	6.21152	6.47218	6.38479	5.87006	7.13359	7.24108	6.8554	6.66627	7.7455	6.85524	6.17141	5.90403	7.04755	5.76378	5.80218	7.14362
PF3D7_0402800.1	2.20969	0.320804	0.583583	0.619841	1.14875	1.99517	0.393963	2.49013	1.45667	-0.566081	2.31217	-1.1932	2.29821	1.06419	1.36713	0.0265006	0.0318681	-0.469716	-0.121178	-0.306064	1.55281	2.04286	1.6015	-1.24499	-0.0889125	2.42373	4.95154	-0.380398	1.3059	3.84999	-0.199347	1.43774
PF3D7_0402900.1	-2.58004	-7.31812	-6.45671	-1.03061	-2.25203	-2.06744	-1.46533	-1.72582	0.138053	-2.81267	-3.03434	1.19046	-1.95029	-3.01558	-0.687199	-4.01884	-6.24098	-4.65987	-5.09384	-6.86706	-3.56464	-1.46101	-4.21246	-4.45555	0.227252	-1.5033	-5.72617	-3.8817	-5.09493	-0.0379111	-0.141401	-2.23434
PF3D7_0403100.1	4.47399	3.65257	4.03414	5.145	5.01127	6.17604	3.98321	5.05606	5.8896	5.34311	1.76517	8.30599	4.76115	4.86645	5.07608	2.1637	7.61633	5.47556	4.6164	4.45026	4.40207	6.95538	4.28739	6.31074	4.99838	5.23322	0.182857	4.78335	4.47425	6.70272	2.8766	4.63419
PF3D7_0403200.1	9.11228	10.5051	8.41202	10.019	9.75935	10.0347	11.5872	10.2728	11.2142	10.7085	8.71316	9.48058	9.80288	10.0592	10.3624	9.27138	9.23287	8.80657	9.76477	10.2234	9.45549	10.05	9.9036	9.56353	10.8409	9.29611	9.62184	9.82806	9.51589	8.47374	8.85928	9.89393
PF3D7_0403300.1	5.81053	8.79231	1.70221	5.08383	4.50301	5.18312	3.91009	4.47328	5.70614	4.92804	-0.149458	-0.717852	5.241	3.10068	3.15308	0.576892	8.34664	5.47645	4.38979	6.95614	5.29802	6.40604	4.64321	4.53472	6.48173	5.52216	-1.40809	5.06711	8.79281	-0.420757	7.8571	4.6089
PF3D7_0403400.1	4.17659	2.93498	4.2566	4.8156	5.16289	5.70105	4.97697	5.47181	5.47539	5.56207	4.29012	5.59549	6.63451	5.18339	7.28993	4.55189	6.45114	5.33312	5.05308	6.23712	2.89672	3.58317	4.79986	5.52372	5.81811	6.46539	5.6076	3.3866	4.74577	4.69818	5.0397	5.3971
PF3D7_0403500.1	5.95112	8.32541	2.56677	6.53488	7.47455	7.32144	5.23236	8.67054	6.34417	6.45659	7.14927	8.9667	6.86139	3.97193	10.5349	6.73154	7.83465	7.61318	7.19456	7.90439	3.76765	5.54167	9.25097	8.63649	5.61048	6.3653	8.56501	6.28788	8.43883	8.23456	7.25894	10.6032
PF3D7_0403600.1	5.18539	7.69934	6.09049	9.40202	9.95073	9.73013	7.84449	7.27374	6.31316	8.14418	7.02634	1.19662	7.66265	5.73535	4.46105	6.10998	0.487117	3.6588	3.88076	3.31454	8.43437	5.20952	6.71831	9.09544	5.46216	7.3729	1.52257	6.69178	9.15939	6.50717	6.17493	7.65209
PF3D7_0403700.1	7.84946	8.31323	6.82598	7.90586	7.80081	8.53076	9.21317	8.08869	7.88606	8.16939	7.50199	7.83664	8.0198	8.16686	8.32934	7.8591	6.60297	7.72993	7.999	7.93835	7.77834	7.73976	7.91403	8.14655	8.43013	8.6202	7.54152	7.60727	8.12459	7.78124	8.14538	8.06713
PF3D7_0403800.1	7.46257	6.08102	6.22979	6.8243	7.29245	7.56866	7.07766	7.6676	6.12061	6.71855	7.27397	7.91597	7.5938	9.09001	6.24687	7.4884	8.01401	7.39393	7.47304	8.31045	8.33966	8.56079	6.97743	6.5601	7.53213	6.86577	6.31207	7.62239	7.91008	8.01912	9.40039	4.91421
PF3D7_0403900.1	10.6084	9.35234	13.0603	12.2931	9.36901	12.2152	10.4614	11.1414	10.1122	9.20686	10.1989	8.35384	8.96917	9.72077	9.57298	10.5563	8.73264	9.76468	9.51875	9.94289	10.5162	10.4179	10.4637	9.6928	9.80154	9.2768	11.4612	9.38247	8.83939	12.7566	9.07852	10.7274
PF3D7_0404000.1	6.2085	7.03253	7.14536	6.38583	7.86338	10.1878	6.85649	6.98276	8.39428	5.899	4.61538	7.53638	6.29275	7.37477	7.00357	7.31745	11.0413	7.22943	6.8726	8.04976	5.80564	6.27596	4.48174	8.43971	7.4413	5.33973	11.347	4.68839	7.31646	9.11296	6.22707	4.58088
PF3D7_0404100.1	5.12941	3.66625	3.71864	2.24629	2.78452	5.63267	3.82999	2.28884	3.38888	3.27409	3.91988	7.17295	3.11348	3.84568	4.56213	5.70728	2.83038	4.34867	4.02695	5.10289	3.9927	4.32984	3.47365	4.05768	3.82512	4.15421	7.60953	4.24887	4.16068	7.36823	7.10627	3.4998
PF3D7_0404200.1	0.514691	7.27638	1.27695	-1.04584	0.521304	3.22151	2.36189	4.56276	1.7963	0.968126	2.10272	0.363576	3.85309	2.49248	1.23975	2.91814	5.46111	3.89307	2.01613	2.13581	1.92118	2.15144	-0.0624288	3.82526	3.1652	1.61899	4.34223	1.14455	1.88842	3.3493	0.109711	0.600196
PF3D7_0404300.1	10.5271	11.8463	10.6713	11.5138	10.5026	11.0727	12.2501	11.2681	10.5577	11.0645	10.2293	10.0602	10.6128	11.2166	10.7209	10.8874	11.5564	10.8406	11.6437	11.9637	11.0506	11.3968	11.0766	10.9348	11.7548	9.86263	10.2078	11.3806	10.9818	11.1817	11.5811	10.8557
PF3D7_0404400.1	10.0993	12.2664	12.7228	11.3789	9.1359	10.6998	9.47454	10.1579	8.67379	9.27202	11.5098	4.88952	9.49709	12.274	5.86537	11.553	11.9219	10.3121	11.6299	10.649	13.4653	11.38	10.1913	10.3513	9.28387	8.01783	8.42437	11.9141	11.653	11.7672	11.7085	7.66252
PF3D7_0404500.1	8.03603	5.59873	6.48338	7.22169	5.42971	6.39868	4.92655	8.94387	5.05193	5.21119	8.12133	10.2467	3.79965	8.07352	7.58134	8.2336	10.7074	8.93423	9.16699	9.10893	6.39511	8.58501	8.00946	8.19596	6.12279	6.86366	7.35226	8.04633	6.66996	8.579	11.0983	5.84037
PF3D7_0404600.1	12.3496	12.3585	12.813	10.3788	10.6722	12.4788	10.532	7.78751	8.71003	10.3882	12.3972	11.7814	10.6772	12.7959	11.6269	11.8601	13.815	14.0058	14.2098	13.9669	11.3288	10.2636	13.1351	13.0393	8.98682	12.3218	12.8011	12.4726	12.4752	14.0738	13.3132	11.5881
PF3D7_0404700.1	9.04877	11.6527	6.77777	10.4582	8.23589	10.3516	10.291	5.77199	9.6558	8.60196	10.1468	10.5877	8.26129	12.4966	10.483	8.43972	13.3478	11.7998	11.2952	11.6805	8.75549	8.56676	11.6457	10.9078	6.54726	9.5626	11.1224	10.1323	10.7711	11.0671	5.36579	9.53659
PF3D7_0404800.1	3.83677	5.7212	6.36882	3.94777	5.76084	4.88347	6.01474	4.9326	4.28864	4.5903	2.31998	5.5235	4.92176	3.50626	5.6612	4.88777	0.808955	3.65444	4.66419	6.13208	3.77901	4.91652	5.45324	4.35985	5.82151	4.44236	5.01342	4.67984	1.07624	5.82365	5.54328	5.80932
PF3D7_0404900.1	6.59399	7.52807	7.75165	7.04458	6.5839	7.00741	6.77114	6.82089	5.70547	5.78652	6.47059	5.83099	6.15969	4.44961	7.20919	5.83259	8.21587	6.82517	7.35178	7.74287	5.8607	6.48495	6.69408	6.92271	6.8403	6.00939	8.25325	6.52537	7.78204	6.43886	6.67003	8.37677
PF3D7_0405000.1	8.01714	8.26258	8.44132	8.93208	7.46992	6.92967	8.20054	8.33392	7.75323	7.85581	7.76526	8.01021	7.6802	7.31856	8.24939	8.1737	6.82576	8.15551	8.38705	8.13105	7.53809	7.35459	8.73058	8.08534	7.8865	7.55622	6.148	7.93996	7.14358	7.48131	6.6039	9.31279
PF3D7_0405100.1	4.99703	5.95824	7.36937	2.42919	3.47355	3.91963	1.97584	3.16814	2.53972	2.28275	4.55346	4.25836	3.06015	2.32035	0.522374	5.57592	5.27379	5.01212	4.52177	5.25039	6.72039	6.76618	4.61569	3.63059	3.37091	2.4471	3.12951	4.50974	6.03966	2.98585	6.92118	2.67956
PF3D7_0405200.1	10.6257	13.155	6.85961	11.1154	9.59379	9.03042	10.3354	9.84293	10.7393	9.55512	8.88112	12.5268	8.76005	9.80937	11.4692	10.7349	12.8655	10.6186	11.7125	9.89395	9.03214	10.1207	11.358	9.96946	9.97006	10.1925	12.6466	10.4364	11.5916	8.4868	7.4124	10.994
PF3D7_0405300.1	7.49102	3.85136	8.07755	7.69852	7.62996	8.17859	7.95899	6.24048	7.90635	7.41821	7.31469	8.61487	7.18794	10.7433	6.13179	7.96329	6.50604	6.00274	7.0403	7.47196	8.30122	8.32719	6.07341	5.89313	7.92614	6.5289	8.43868	6.37358	5.01407	7.69273	8.61598	3.14031
PF3D7_0405400.1	7.07869	7.04321	7.75694	6.83691	6.88279	8.01373	7.17424	7.54509	6.97781	7.65673	6.81152	7.30265	8.02622	7.43186	7.4276	7.42679	7.05597	7.59742	7.84034	7.6498	7.16468	7.28418	7.45281	7.57768	7.36799	7.52815	7.41653	6.97068	7.3979	6.76681	7.03362	7.10682
PF3D7_0405500.1	11.7238	9.42048	10.108	12.8986	11.9353	5.68164	10.3318	13.0437	10.2948	10.6109	13.0063	13.9673	10.0591	11.9971	12.309	13.8385	7.26065	13.1526	12.6495	12.9371	11.5788	13.0287	11.2456	12.2991	11.337	10.9992	11.0902	11.509	9.84452	12.8577	19.9669	10.9992
PF3D7_0405600.1	5.2828	8.92142	8.34939	5.53301	4.88085	5.01777	2.69606	5.68526	4.60908	2.9992	6.57418	3.85742	1.97902	1.56933	5.48399	4.63779	8.74271	6.54204	5.48907	5.88592	3.82853	5.81329	6.35808	6.43261	5.61756	4.47157	5.22253	6.61718	2.21459	6.66969	9.90295	7.92569
PF3D7_0405700.1	7.07458	10.5233	11.3118	7.57622	9.29768	9.8189	7.4531	5.56055	7.1316	7.52991	7.68328	8.56633	7.47338	7.14629	6.85901	6.40053	9.58245	7.99636	7.9936	8.65928	8.49513	9.13017	7.99622	8.85683	6.90586	8.59364	9.99401	7.82237	7.66581	8.45241	4.99613	7.97367
PF3D7_0405900.1	8.7157	6.45965	6.10878	9.91263	7.61246	9.81204	9.078	7.35987	7.18261	8.42449	7.40437	12.5163	10.0174	8.12476	9.87697	5.65787	6.41624	8.14708	8.26187	6.00493	7.0985	9.64596	9.72224	7.84066	8.88958	7.74825	6.14361	8.88263	6.39915	4.96713	7.08508	8.97434
PF3D7_0406000.1	9.10398	10.52	8.83835	10.0205	9.40772	8.53754	9.85837	9.83904	8.48178	9.10236	9.17119	4.09119	9.58479	11.2972	8.58373	9.01579	9.60845	9.49894	9.34003	9.37256	9.29044	7.64328	9.22842	8.49464	8.84561	9.11715	9.98264	8.99376	8.51138	9.32457	8.52816	8.24047
PF3D7_0406100.1	9.67304	10.7241	10.2622	9.9756	9.18571	10.533	9.75382	9.26112	8.66182	8.59086	9.89845	9.10861	8.43827	10.0342	8.64525	9.92979	9.12394	10.0845	10.4403	9.94036	10.1373	9.72499	10.3047	9.95074	9.16772	8.77881	8.87194	10.2021	9.16076	10.0026	10.0415	9.22126
PF3D7_0406200.1	13.1436	16.9359	13.5783	12.8021	11.7837	13.2998	12.4209	15.3198	13.6356	9.91134	14.1373	9.27524	10.2749	12.0888	8.7669	14.6619	12.8934	11.2427	11.5979	12.8873	15.4303	14.9593	13.0528	12.2597	13.3781	10.8085	10.5081	13.9951	12.9192	11.4776	14.8741	11.0172
PF3D7_0406400.1	5.69367	8.31423	7.52211	4.49368	3.71626	6.37867	4.20175	5.77332	6.47241	4.65167	6.67911	5.52622	5.65673	1.74058	4.08354	6.17184	6.94287	6.47424	5.16559	6.46486	7.44671	6.96087	5.43506	4.65718	6.62802	4.87782	3.80524	6.47628	9.18115	7.81725	4.65007	8.385
PF3D7_0406500.1	7.09512	7.57337	7.06671	7.23359	7.06574	9.49674	8.42646	8.64371	9.46256	7.83322	6.9134	8.07563	8.24838	7.80993	8.11644	7.49825	7.82737	7.56181	7.80645	8.261	7.53252	8.0503	6.99409	7.28121	9.75849	7.44422	7.22998	7.33764	7.56183	7.68738	7.79381	7.38706
PF3D7_0406700.1	9.27652	8.56751	8.43687	6.40801	8.09581	10.4051	9.6409	10.3241	10.4638	9.27925	9.67928	7.06324	10.0358	8.90357	9.44914	7.11871	7.32242	7.32503	7.27703	8.9833	8.68513	9.22718	8.97657	9.12282	8.30977	9.34773	10.6034	9.56491	8.45503	5.79812	7.84026	8.84192
PF3D7_0406800.1	8.88653	13.042	10.4555	10.7361	8.61678	4.63937	12.3042	3.93127	10.7123	10.7598	9.93857	3.75745	7.67053	10.0965	4.87486	9.62716	9.43252	8.34716	8.08644	3.8156	12.3518	9.1278	9.86575	8.55651	5.94698	10.5082	8.13697	10.2565	11.9691	3.41825	3.09398	8.4091
PF3D7_0406900.1	6.46228	7.55754	6.47915	8.24447	9.51758	8.20996	10.4545	8.09521	8.84036	9.55569	6.11439	7.22385	9.28073	8.39611	8.31252	6.90536	1.78645	5.49909	7.27961	6.67679	8.08731	7.67093	6.77962	7.58458	8.35107	9.35279	9.02884	6.69487	7.98786	6.25258	4.76291	7.68717
PF3D7_0407000.1	3.15385	4.47375	3.55152	5.94078	6.50035	7.82162	5.84164	7.12467	6.6359	7.12433	4.98281	5.9866	7.05698	8.2654	7.00287	5.93184	8.3445	6.07492	5.23008	6.25698	4.64038	5.41988	5.67382	5.76179	6.67665	7.49376	7.72535	4.82089	6.02938	4.846	4.53479	3.54635
PF3D7_0407100.1	2.77597	3.87653	-2.00544	4.18518	4.42047	4.47468	2.90104	3.01869	3.7122	4.24584	3.10759	4.55076	3.69916	5.58965	2.15317	3.76776	-0.659977	2.00528	1.26251	2.93697	4.30146	2.9475	1.65894	2.0912	4.3148	3.83794	2.64048	1.82986	4.40421	1.05572	2.64466	-0.0491113
PF3D7_0407200.1	6.143	9.30826	2.81894	8.14133	7.04526	7.70704	6.96882	8.7862	7.59477	6.59006	7.69895	8.74029	7.13883	2.70453	7.94119	7.37771	1.18159	6.68596	5.91037	7.08434	7.614	8.54171	7.06874	7.02327	8.73628	6.34405	5.79548	7.24423	10.7053	8.35938	10.3508	10.6104
PF3D7_0407300.1	8.14302	8.52808	10.4409	7.45799	8.16728	8.77732	8.32222	8.9106	8.40747	8.09713	7.98725	10.8079	8.40022	5.61649	8.65997	8.50061	12.0057	8.90393	8.71865	9.49001	8.177	10.0717	8.50121	9.07514	9.37813	7.7921	8.43144	8.55176	9.98415	7.62277	9.05739	9.63272
PF3D7_0407400.1	8.25921	5.10561	13.2016	4.79283	7.81287	9.30308	9.7364	10.2098	9.22989	9.21697	8.06427	5.79609	7.00529	4.66427	7.90048	7.12503	9.85016	8.48203	8.36044	7.33022	8.66406	6.56356	8.2246	7.81911	8.00297	8.23751	3.49883	8.64581	10.904	11.4063	4.46812	12.2239
PF3D7_0407500.1	8.61689	13.7368	7.81672	9.75142	9.22088	9.35501	8.27906	9.54641	7.00705	7.01202	9.90848	11.2686	6.93561	10.3049	5.60334	9.96491	4.20399	10.3698	9.57384	10.0768	11.8706	10.0291	9.3479	9.13982	8.77859	7.88185	2.71453	9.31155	8.39094	11.3221	5.98534	7.92959
PF3D7_0407700.1	6.92143	4.00958	11.9854	6.2933	6.16779	8.55057	7.55251	4.5545	7.65917	6.63643	6.98944	7.44128	6.60588	3.98117	8.33328	6.16876	8.33769	6.21738	5.1923	7.30367	5.41432	6.7134	7.2012	6.78676	6.96839	6.99805	8.89796	7.27205	4.63947	9.41334	8.46709	9.45811
PF3D7_0407800.1	11.94	16.042	10.435	11.7855	11.5039	10.6861	12.249	11.3928	12.4415	10.4472	12.5251	10.7833	11.1046	10.8193	9.64158	12.2146	9.88418	10.8668	11.3374	12.005	13.8698	13.1901	11.6633	11.8856	10.9787	11.1186	10.8213	11.6383	14.0499	12.3979	10.2306	12.1683
PF3D7_0407900.1	6.74356	3.5779	7.95921	7.44286	8.15561	9.32729	8.35337	8.87125	7.31065	8.0169	6.32376	6.98017	8.17227	9.4075	6.85332	8.05018	10.5311	7.69877	7.60192	8.22682	8.14892	8.7201	7.65753	6.98749	7.98473	7.87233	6.9536	6.26127	9.50954	7.18795	9.34089	4.63997
PF3D7_0408000.1	10.5582	9.36645	8.96064	6.31071	7.18735	8.33087	10.9507	12.9574	9.81374	11.7237	8.03556	11.2472	11.4721	8.59092	11.2899	9.4672	8.43215	11.7802	8.51781	8.0483	8.70178	11.0893	9.08244	10.1732	10.1392	11.3296	10.8579	7.99294	9.02642	6.53969	8.22523	10.1679
PF3D7_0408100.1	4.6757	4.73823	5.17535	4.68986	5.09921	4.99564	5.55842	4.86423	5.691	5.40458	4.5304	5.5548	5.67002	3.67416	5.71546	4.77873	3.9081	4.68095	4.76883	4.9765	4.57873	5.04145	4.58077	4.49985	6.32467	4.68634	5.26518	4.85694	4.74783	4.41971	5.87746	5.91959
PF3D7_0408200.1	6.0973	6.15781	0.724911	5.60194	5.171	4.4571	6.27977	4.97527	6.08633	6.0698	4.97923	5.85389	5.85372	7.44442	4.21787	5.46203	3.71028	4.71904	5.08697	4.48196	6.5381	5.58798	3.45486	4.2791	6.63746	4.272	3.93102	4.61868	6.52045	3.96412	5.58215	2.80276
PF3D7_0408300.1	9.18133	9.09664	12.4928	9.41875	8.32888	9.68105	8.91666	11.0202	8.30825	7.99817	9.75442	5.85509	7.75436	9.31594	8.34465	10.0841	11.3365	9.75738	10.0625	10.0262	9.32479	8.57452	9.26183	9.52362	9.06583	9.7957	9.53574	9.60788	8.89987	10.0891	9.70449	9.07385
PF3D7_0408400.1	5.30731	3.0928	3.18484	2.27702	3.7812	2.3795	4.69247	2.63922	5.44986	4.0276	1.59491	7.67665	4.78491	3.82463	3.49466	4.6003	2.48635	4.05624	3.06179	1.95399	4.77042	4.13415	1.66939	1.54043	6.273	5.27938	1.65664	3.43997	3.54494	4.92883	2.83145	3.23263
PF3D7_0409000.1	2.29466	4.20798	1.15327	0.724605	2.33089	1.54991	1.65355	2.77847	2.65345	2.32263	2.31602	2.47652	2.4516	2.07149	1.02914	1.5154	2.04243	0.887594	0.827637	1.53536	3.33554	3.86068	1.5761	-0.115445	2.43209	2.2117	3.85455	1.79013	2.23657	1.58034	-0.888605	1.1986
PF3D7_0409100.1	6.33856	6.3075	5.38822	7.01611	6.18296	6.55833	7.3743	6.58906	7.16716	7.56588	6.35016	7.19197	7.0998	6.49221	7.27859	6.47576	6.71604	6.04165	6.15284	6.03151	6.04787	6.65658	6.49853	6.32179	7.46092	6.73159	6.34983	6.08719	6.44545	5.60957	6.34623	6.77202
PF3D7_0409200.1	7.86039	6.5064	7.72723	8.50254	8.21386	8.52876	8.53408	8.08617	8.83146	8.76352	7.71587	8.94023	8.81689	7.37851	8.27619	8.06593	5.95852	7.51274	7.5581	7.32914	8.22705	8.20928	7.9816	7.37034	8.78632	8.1399	7.58346	7.54666	8.946	5.99111	7.73472	8.26562
PF3D7_0409300.1	5.05094	5.13452	4.6791	4.67567	4.92568	5.20135	4.48945	5.00766	4.42426	5.00479	5.32778	5.14082	4.95203	3.70827	4.21226	5.59766	3.85089	5.21798	4.6637	4.6906	5.76729	4.97136	4.57934	5.15217	5.04646	4.92351	3.86459	5.18384	7.22545	4.56054	5.99843	5.33614
PF3D7_0409400.1	7.87313	9.4036	9.00468	7.78917	8.37485	8.12215	7.66731	7.67424	7.04465	7.48066	7.94762	8.71348	5.86838	4.75035	8.00871	8.37458	8.7073	8.11862	8.37054	8.77088	7.70999	8.5414	8.77752	8.43144	7.89928	7.47241	8.39579	7.81237	9.52863	8.29688	10.0599	9.86331
PF3D7_0409500.1	10.7396	8.60929	8.14796	8.11772	10.6635	8.2217	11.89	12.8018	10.7831	10.999	11.309	8.9086	10.0557	15.2053	9.77555	11.5128	14.5255	11.0528	11.8228	11.964	11.7017	9.49331	10.9839	10.5146	8.9557	12.3231	6.68064	10.7379	13.085	12.5983	8.43619	8.16567
PF3D7_0409600.1	7.57208	9.36576	8.95939	7.12351	6.78724	7.82876	4.84891	2.94505	3.87366	5.84031	7.46846	8.16989	5.48436	4.09691	6.31112	7.73275	9.48806	8.0503	8.5929	8.79586	6.78617	6.57838	8.08311	9.24932	5.3824	7.07779	6.57334	7.33781	9.53078	8.33033	10.4572	8.69481
PF3D7_0409700.1	11.884	8.66186	15.8714	11.2907	8.94603	13.7996	9.88252	7.60944	9.00021	10.0593	12.968	12.8224	6.89721	9.70235	9.60837	10.5418	8.59227	13.6144	13.3843	15.1929	13.1891	13.6434	11.1352	12.2405	9.01651	10.1037	14.0988	12.6806	14.3672	11.9197	16.2182	11.1261
PF3D7_0409800.1	7.13118	6.7613	7.63816	6.73842	6.51574	6.49679	6.28654	6.89202	6.83435	6.94751	7.53907	7.04874	6.66991	6.63736	6.9273	6.94815	7.02938	7.33422	7.29599	7.04647	7.04328	7.38057	7.28803	7.03261	6.66339	7.10027	6.80371	7.09123	6.77217	6.89119	7.8078	7.23634
PF3D7_0409900.1	8.28553	4.06018	4.74218	8.98457	6.33839	1.10007	6.65614	8.04353	7.30361	6.90979	8.65203	8.38716	6.64443	4.0429	8.77687	8.25681	9.45754	6.29877	6.89963	6.21936	5.92228	6.90692	8.32311	6.75213	5.49605	6.98755	8.1893	7.57053	11.7348	1.16107	7.68353	9.59153
PF3D7_0410000.1	9.83005	8.80327	9.64668	9.06409	9.83095	10.118	7.83213	10.4612	7.01578	8.08668	9.782	8.6919	8.47092	8.20099	8.47625	9.83348	7.88948	8.02993	7.98384	8.74746	9.4547	8.63302	9.16861	9.74344	7.37291	10.82	11.1021	9.65811	11.0271	7.80407	8.38102	8.94622
PF3D7_0410300.1	3.65486	2.83753	4.43178	5.67113	4.76804	5.94892	5.69017	5.75375	4.85077	5.38797	3.70498	5.84321	5.84768	4.70447	7.48324	4.53693	6.0929	4.65913	4.23201	5.75075	2.00075	3.78128	5.09201	5.92655	6.21324	5.85393	5.38588	4.24568	2.76038	2.95257	6.05285	5.23528
PF3D7_0410400.1	6.03185	3.08115	11.8461	8.84665	7.91201	9.14244	8.32983	10.4871	7.95479	8.09898	6.5893	11.0682	8.98253	5.09254	12.0286	6.38148	9.66537	7.91253	7.10265	8.16052	3.80261	6.29204	8.45147	8.00279	9.00543	8.37704	8.85319	7.11322	4.12038	8.61232	2.59451	11.7625
PF3D7_0410500.1	14.3084	11.5286	11.6624	16.1628	13.7443	14.7367	13.7674	8.98114	13.0694	12.5083	14.7696	15.0826	13.8082	12.9119	13.0904	8.29504	9.56923	11.4512	13.516	8.13977	12.4687	15.1378	13.3706	13.2671	11.2662	11.8479	14.8889	7.75299	11.3042	7.52094	10.7105	12.1184
PF3D7_0410600.1	7.62408	8.41422	2.85012	8.67303	7.91025	7.757	7.05971	6.97841	6.0425	6.07192	7.96262	8.562	5.58487	12.3731	6.98526	7.09478	8.29812	7.98574	7.29105	7.86995	7.01306	7.50059	8.24943	7.60696	6.42057	6.43639	6.50553	7.83401	3.84434	8.18553	9.0187	3.41698
PF3D7_0410700.1	10.0746	10.0116	8.97713	9.62206	9.2812	8.75336	10.2943	9.50682	9.24772	9.7642	10.1437	11.3343	9.00854	9.32166	10.0097	10.2365	8.59159	9.1179	8.94951	9.40566	9.42621	9.2142	9.0194	10.2122	9.12359	10.81	10.4057	9.2999	9.93985	9.74038	7.79714	10.1528
PF3D7_0410800.1	11.5467	10.2661	11.3134	10.3766	10.4069	11.5183	10.7078	11.6377	9.34869	10.5736	11.3745	7.13908	10.4009	12.2864	10.4454	11.6486	9.78359	10.9411	11.1836	10.77	11.0966	9.37494	11.2079	10.4615	9.56592	12.0618	13.0426	11.119	11.2585	11.1595	11.755	9.94158
PF3D7_0410900.1	11.2657	8.7001	11.8041	10.5695	10.1598	9.80834	9.76588	10.9279	9.27026	10.0983	11.2672	10.804	9.44756	11.4746	10.2975	11.0854	11.0611	10.7636	11.0532	11.6125	10.9718	10.6428	10.2277	10.6504	9.46463	11.4979	11.7731	11.5717	11.0643	11.4138	11.1894	9.83086
PF3D7_0411000.1	13.6671	13.2206	12.7362	11.4878	10.917	13.0584	12.323	13.1536	11.0429	11.5818	13.591	12.0771	12.2768	13.8738	12.7303	13.5141	13.5647	13.5237	13.8057	14.1986	12.4057	11.9435	13.2907	13.2038	11.9363	12.8988	13.2849	13.4189	12.1726	13.254	13.6557	12.1437
PF3D7_0411100.1	14.0215	13.4786	14.4435	9.66406	14.23	15.7984	14.54	17.327	13.526	14.706	14.3469	12.4842	15.2478	16.4712	12.2414	13.7615	8.61393	14.0433	13.8254	14.4694	16.2938	14.8196	14.2939	13.1258	13.3523	15.2228	14.3745	15.0343	14.5457	8.45697	11.7615	10.9208
PF3D7_0411200.1	8.35667	6.4153	13.5806	9.35943	11.5685	13.8157	7.71198	9.75072	8.44587	9.86013	8.44224	6.98861	8.75838	6.64401	8.70095	9.31086	10.7653	7.55745	6.83126	9.77499	8.49691	7.6617	9.31238	10.2831	8.35183	9.65452	10.0159	7.69055	10.5701	9.47774	9.43809	9.53651
PF3D7_0411300.1	3.29058	3.22875	3.86143	6.38247	6.10773	8.58231	3.55609	3.2699	4.17793	4.56612	2.8755	7.97316	2.11303	4.82108	3.60896	4.99648	1.24981	3.15204	2.41449	2.83311	3.76904	3.65045	2.38749	7.29782	3.29334	5.0637	6.92662	3.30097	4.2077	1.12337	2.6266	1.27563
PF3D7_0411400.1	5.92114	8.26487	7.30254	3.16525	4.39376	5.19654	1.95558	3.21184	4.28432	3.15955	5.43812	6.75746	2.76201	4.29684	4.10604	5.70451	7.08072	7.32412	6.04473	7.28704	5.24343	5.94775	6.51816	4.96017	4.1357	4.81982	5.98862	5.5529	3.36577	5.58509	6.89039	4.70891
PF3D7_0411700.1	20.149	19.3446	19.4013	16.0661	19.9508	16.5115	19.5465	17.3319	22.3443	22.2737	20.4735	18.0735	16.143	21.0067	16.5556	21.0196	14.9592	19.6537	20.1529	14.2795	21.432	15.3945	17.8513	18.3261	19.5976	20.5704	13.2517	21.2431	19.229	14.0981	17.7931	17.7008
PF3D7_0411800.1	6.20973	9.80112	4.43343	6.74984	6.31035	4.64512	5.18604	6.64702	6.41063	5.91272	6.02658	3.55908	5.97715	5.06224	5.3667	5.00487	5.07163	5.73645	6.0479	6.64436	7.28067	7.33202	6.11571	4.3245	5.96121	5.33177	8.31664	6.67663	8.00712	5.98822	4.70769	7.06392
PF3D7_0411900.1	8.92727	10.9638	8.19473	8.10009	7.80477	7.70251	8.37167	7.89684	7.45857	7.66322	8.0297	7.18329	7.82165	9.44601	5.22477	9.15031	10.0545	7.13844	7.71771	8.15431	10.5076	9.61683	7.90596	6.79724	7.62054	7.74939	9.33558	8.89785	10.0481	6.28887	5.01645	5.69512
PF3D7_0412000.1	10.137	10.1129	10.1456	9.04456	10.772	12.2242	11.065	10.2034	9.26982	11.2367	11.3768	11.0224	12.2041	11.5162	9.77465	10.5689	8.28012	9.35242	8.65699	9.99744	11.0394	10.2372	10.7158	11.0628	10.1721	12.2419	7.84243	10.2281	9.86733	9.76595	9.84425	9.42206
PF3D7_0412100.1	2.23388	5.11726	4.98747	2.54137	2.86363	2.93906	3.20401	3.93454	2.10916	2.21454	2.37332	4.7311	3.08661	-0.796003	2.99436	3.47125	-1.83259	1.97698	1.87059	1.24282	2.22333	2.21227	3.65432	1.63824	3.79648	1.99671	2.35615	2.38873	0.178028	1.38459	-1.90796	5.7241
PF3D7_0412200.1	5.18235	1.60613	2.15245	7.68493	5.2671	5.96657	5.79088	8.51217	6.59632	5.94169	6.54254	5.48322	7.04718	3.5745	9.42975	5.34494	9.08129	5.29599	3.84267	5.51893	2.31723	1.82683	7.33722	4.44584	5.68519	5.1777	5.27958	4.62295	8.60065	4.25462	1.26199	9.48238
PF3D7_0412300.1	2.59731	-0.965938	-0.477472	-3.43975	0.601647	-2.39039	-0.168693	3.06616	-1.40477	-0.491249	2.27843	1.76451	-0.919463	-0.186699	1.18125	-1.44594	-1.42213	2.45165	0.813903	0.734665	0.556741	0.365442	-2.46999	-2.6624	2.35364	1.04342	3.64386	1.56939	0.316503	-2.24948	2.95849	-0.0633861
PF3D7_0412400.1	3.74332	9.01779	4.99011	7.71795	5.26609	4.71155	6.10674	3.85077	2.96851	3.98175	5.44728	6.13088	4.7006	4.39873	6.11006	5.46189	7.24734	6.67995	7.17255	6.20044	4.80951	5.87615	7.04823	5.70782	5.32341	5.34486	6.07787	6.57279	5.7051	8.66986	4.96554	7.78541
PF3D7_0412700.1	2.58189	10.5319	3.73842	6.52537	4.87703	7.42009	5.94253	4.68181	2.63958	3.92167	4.38342	3.77948	4.16866	3.47475	6.38588	3.83982	10.2594	6.81912	7.28452	5.69161	3.65048	4.61214	7.28287	6.38461	4.41363	5.03672	6.93528	6.59205	7.53651	9.09376	1.65648	8.53227
PF3D7_0412900.1	7.31625	9.38913	9.26847	13.2471	10.512	11.578	11.6834	7.59019	10.2278	9.06007	7.95425	7.69262	7.85173	13.0063	8.80532	8.3294	6.8278	11.6546	12.7339	7.1163	9.89188	9.20213	8.55645	10.638	9.38432	10.9021	11.9207	7.86969	9.77226	6.76736	7.74039	6.67602
PF3D7_0413100.1	6.26961	7.93413	1.53449	3.58795	1.78001	0.448293	4.36653	5.84315	0.175358	3.93822	6.14207	1.02584	3.62742	6.70148	2.20997	7.23204	7.59005	5.64965	6.55958	5.15377	6.29464	4.0954	6.9655	0.373293	5.08309	2.8973	-0.10066	6.55171	5.17513	6.44868	6.8537	3.65226
PF3D7_0413500.1	7.86152	4.61802	11.0164	3.56309	5.48048	4.38299	6.60662	3.72687	6.43996	6.78173	7.65072	7.86173	7.34708	5.02044	5.17011	4.26563	4.69234	6.64953	6.114	4.11668	7.32005	7.56629	2.26931	6.63811	5.8916	6.2657	7.9519	3.60372	4.54798	8.06723	4.58259	6.20633
PF3D7_0413600.1	6.21349	7.81113	8.37946	7.43748	7.04072	7.12256	6.55881	7.01225	6.20372	6.30116	7.30481	6.28982	6.19863	6.82154	5.68911	7.24387	6.78729	7.19682	7.10357	6.72618	7.29117	6.66193	6.70104	7.0779	7.00606	5.99214	6.02465	7.05674	6.06574	6.43401	6.11124	6.42231
PF3D7_0413700.1	9.7268	13.0454	6.45789	11.3068	9.2268	8.60053	8.79762	12.9814	10.0088	9.82353	10.9276	10.5276	9.18812	8.26773	12.5473	9.65952	13.6123	10.6099	11.5366	10.908	8.00699	9.20444	10.815	11.6646	9.09887	9.32206	12.3931	10.3237	12.514	10.8213	6.36438	13.3967
PF3D7_0413800.1	9.24948	8.09689	7.88662	6.71516	9.32511	7.27222	8.7038	6.87728	7.0794	6.44605	6.40442	11.1501	6.77013	7.97602	8.23979	6.96944	12.6069	9.68319	10.1968	10.7186	6.79529	7.10771	8.59953	8.34488	8.34759	5.98828	5.03939	6.45311	8.06499	5.72272	7.29582	7.40411
PF3D7_0413900.1	9.37741	11.6558	11.54	9.56341	8.55092	9.30117	8.85803	8.59022	6.32234	8.62388	9.62292	6.43995	5.72209	10.4067	5.57734	9.81784	10.1667	10.3402	10.8324	10.3935	11.6168	10.3279	9.39312	9.12382	7.87946	7.78662	8.15216	10.0751	10.0436	10.5788	9.92412	7.18397
PF3D7_0414000.1	9.93635	13.4057	12.4372	10.6768	9.17533	9.96139	9.82315	11.1415	10.0793	10.9444	10.5843	10.5298	8.83661	9.62267	9.02394	11.1003	10.8256	10.3868	9.47689	10.3229	10.4004	10.5162	9.62124	11.0466	10.3158	7.45432	10.5888	10.6123	7.4414	10.6254	6.91057	10.3299
PF3D7_0414100.1	2.75881	0.34252	5.27174	2.21606	3.00094	2.3304	1.74136	0.964807	1.68935	1.83818	1.99476	4.55694	1.4512	1.7861	0.0723546	2.93174	4.20383	2.98571	1.80575	2.14373	3.80507	2.70217	0.748419	4.44287	0.408258	1.01174	0.47195	2.72079	4.76337	3.21896	0.656637	1.25627
PF3D7_0414300.1	9.7854	10.7017	11.8917	8.6008	9.67149	10.0224	7.95945	11.784	9.24205	9.06635	10.611	5.13343	4.06005	5.6749	9.05872	8.72101	10.5145	10.475	9.57577	9.5289	9.14871	7.84648	9.97006	8.70678	8.50323	8.78367	10.2073	9.52208	11.0003	11.4924	9.55482	12.5972
PF3D7_0414400.1	6.54558	5.22119	5.6684	9.37899	7.53055	8.1972	5.45166	4.74851	3.95357	5.11749	6.08969	5.64125	3.50719	7.45187	5.32353	7.867	3.85151	5.12715	6.71486	7.4647	7.23234	5.96662	9.36125	2.87108	6.94586	7.31464	3.29428	7.32902	5.78489	9.07181	11.2686	5.66952
PF3D7_0414500.1	5.64717	5.04388	5.15385	5.35419	6.90002	7.05169	6.44092	6.58346	6.50499	6.89465	6.90688	3.04019	6.46486	5.7726	6.29294	4.04723	4.20798	6.11322	5.8457	3.55698	5.81335	5.20498	7.3894	1.48062	7.16424	5.78021	6.98607	3.38525	5.47371	2.7797	4.35226	6.14699
PF3D7_0414600.1	8.62833	6.0554	6.39342	8.26798	7.90321	9.81312	8.68258	9.61223	9.02133	8.34366	9.51233	5.92761	9.18061	8.69069	6.66307	7.73066	11.0425	7.38203	6.30086	8.8238	10.2084	8.27091	8.91828	7.50999	7.08908	6.57338	3.74904	9.42917	13.4573	9.88553	6.20727	8.39165
PF3D7_0414700.1	6.62841	5.90946	10.3951	5.14938	9.32249	10.938	6.80827	10.8279	6.29023	7.24156	7.08468	6.32194	7.39527	6.85419	5.8713	7.25728	5.307	6.00721	5.93801	7.66743	8.1098	7.1509	7.02167	6.82856	7.93615	7.46947	4.40049	5.55073	5.87682	9.99452	5.89073	6.55304
PF3D7_0414800.1	5.73821	4.65538	4.4577	6.01956	9.77501	10.159	7.89801	6.22989	8.04907	8.96777	2.95632	6.58824	5.7604	12.4621	6.09933	5.80844	3.18348	4.8437	4.06053	7.8263	5.98817	5.22343	3.96526	9.54679	4.91238	9.76491	9.16516	3.15786	4.46164	3.31969	3.96885	-0.208044
PF3D7_0414900.1	8.1905	7.41956	13.2938	10.5704	10.9815	12.2877	12.1088	6.37155	11.4405	10.5009	9.7114	11.0815	11.1577	9.19992	8.33963	10.4188	12.6353	8.78822	8.48806	10.5703	11.4499	10.5402	8.82578	10.8325	9.5872	9.24495	10.181	9.30544	13.9547	10.3799	7.47876	9.30908
PF3D7_0415000.1	2.72987	5.74751	5.29549	2.87938	2.24464	3.39828	1.77911	1.60839	2.17323	2.16333	4.0848	2.81749	1.44404	6.34748	-0.565663	4.83821	5.11731	4.25326	3.67263	3.262	5.68389	6.12286	3.55075	2.78886	3.1091	2.00936	1.66124	4.42027	-0.196685	5.39013	6.84037	-1.17486
PF3D7_0415100.1	5.67253	7.77215	7.15154	5.7948	4.77054	3.91959	4.62708	5.45387	5.07132	5.17579	5.92232	5.79019	4.00829	0.820659	8.1563	5.95424	8.68577	7.53492	7.55811	7.46852	3.49914	5.07507	7.09663	6.57036	6.33584	5.08393	6.4651	6.32082	6.36264	8.1252	9.66051	10.9085
PF3D7_0415200.1	5.37112	6.69973	8.27473	4.98598	5.48331	4.42116	5.14193	5.05129	4.7903	4.69845	5.19504	4.2205	4.75418	2.64463	4.50946	5.45256	5.49304	5.92465	5.24306	5.95814	6.03455	5.64965	4.91071	5.16886	5.36819	4.90539	5.74127	5.81255	6.54243	6.40627	5.46934	7.16777
PF3D7_0415300.1	7.90208	9.08258	7.85533	8.98724	8.69862	8.77058	9.82947	9.19828	9.35085	9.37463	7.74898	8.28323	8.87718	8.97736	8.96274	8.18205	8.36994	8.53347	8.99007	8.98898	8.65765	9.16029	8.76001	8.51993	9.36849	8.71327	8.41274	8.56816	9.00106	7.92077	7.91439	8.69786
PF3D7_0415400.1	4.20483	4.70444	5.68432	3.22316	3.57811	3.84497	3.02424	3.57872	4.01457	3.77144	4.72922	3.78243	3.47808	2.46101	1.70018	3.9424	2.69666	4.57821	3.43741	3.34198	6.12141	5.38034	3.16727	3.11572	3.95621	3.01369	2.69029	4.26996	5.64445	3.92132	3.73963	3.97127
PF3D7_0415500.1	4.27926	7.40022	-0.0601162	5.69007	4.17368	5.75205	4.4381	5.61316	5.34957	4.44312	4.62362	5.81546	4.68836	7.08225	5.81689	4.42442	6.87355	4.62606	4.05615	4.00205	2.94848	5.39907	6.27257	5.23694	5.69804	4.27882	2.54255	3.60294	0.23775	5.52237	6.33157	3.20537
PF3D7_0415600.1	7.7944	13.9065	7.72982	10.2309	10.1526	9.54999	11.0661	7.44701	12.2662	11.1619	8.77853	8.19325	11.1232	7.60602	9.49805	10.0803	4.87634	5.09036	6.96881	7.19643	8.56564	8.08537	9.51695	10.1948	10.1536	8.74161	10.2977	8.9218	7.50423	4.52296	6.4151	10.4774
PF3D7_0415700.1	4.34572	2.58442	3.1995	1.3274	4.1513	0.809602	3.80852	2.34061	5.67727	4.29166	4.29662	3.22435	4.55464	4.78194	2.74072	2.55897	7.56513	3.49724	1.69386	4.01096	4.402	3.05496	1.83304	1.20628	4.57258	3.19311	1.20288	3.69682	3.56	4.30836	2.34406	2.48914
PF3D7_0415800.1	7.41567	6.09644	5.88042	4.53709	7.6521	5.54333	7.51539	8.26293	8.32701	6.48821	7.4357	5.33506	7.48708	7.02904	6.42212	5.31685	6.02781	8.29032	7.31306	7.32755	8.81044	7.6367	7.06545	7.10608	5.07728	6.08998	3.85199	7.71489	10.2676	10.9491	6.12105	8.365
PF3D7_0415900.1	10.0563	10.4841	10.3778	10.5363	10.2525	10.2491	10.8937	9.81074	10.2488	9.93964	10.0009	10.2488	9.78041	10.6941	9.69705	10.5	10.0918	10.0074	10.4338	10.0715	10.3317	10.1528	10.5464	10.3875	10.0119	9.19527	9.52248	10.2441	9.52871	9.81043	9.73924	9.68659
PF3D7_0416000.1	9.1208	9.10975	8.26593	9.3922	8.4927	9.51366	8.60541	8.04671	7.09171	7.9679	9.21789	7.76709	8.05281	10.3018	9.18042	8.69769	9.2641	9.68386	9.98402	10.2169	7.77507	7.10175	10.2904	10.4595	7.60449	8.52733	6.35927	9.14346	7.25852	9.87304	10.5731	8.77143
PF3D7_0416100.1	9.77567	11.7892	5.68966	8.20246	9.04526	10.258	9.19726	10.5125	8.76731	8.79449	10.3121	10.5973	9.52556	7.52371	11.1874	9.26076	10.4452	10.3326	10.3738	10.5256	8.80861	9.56117	11.2117	10.8107	9.27326	9.8628	7.75783	10.4325	12.5618	11.8725	11.9677	12.4735
PF3D7_0416200.1	11.0441	15.3282	8.64816	12.3446	11.1424	10.5979	11.9226	13.8911	11.7836	11.2789	11.9988	6.88175	10.8241	12.707	11.6873	10.2033	13.8558	11.8867	11.5212	12.2262	11.1459	13.3922	12.1451	11.1342	12.4032	9.83067	12.8553	11.2924	9.40432	12.7475	15.6197	10.7988
PF3D7_0416300.1	10.6854	9.61194	9.38816	11.8192	11.4635	12.9513	11.7103	12.7665	11.9761	11.703	11.3355	12.0609	12.2496	14.3307	11.61	11.8519	12.2119	11.3993	12.7096	10.6162	11.775	10.8123	11.4568	11.4471	10.7897	11.3362	11.8349	11.7063	13.0253	12.5262	7.68823	9.92375
PF3D7_0416400.1	8.31553	12.2017	11.7968	6.85907	9.043	9.79707	6.90115	9.22448	5.55117	6.75492	8.24518	8.32226	5.744	6.28745	8.04152	8.54998	12.2742	10.026	10.5921	10.9142	7.30382	8.65303	10.0003	10.3014	8.30589	6.12047	8.08933	8.61155	6.05154	10.2291	11.4349	9.32584
PF3D7_0416500.1	11.7131	10.8373	10.7486	8.41359	9.47651	13.7684	10.1534	8.91013	9.89757	9.20971	8.1255	9.3574	11.1344	11.3986	11.2109	8.70425	15.7685	12.2548	11.7073	12.4649	9.49825	9.08858	10.9912	9.9828	10.2738	9.24438	11.3362	12.3083	10.6836	14.0635	9.92765	10.6273
PF3D7_0416600.1	7.78323	6.69578	6.8518	8.75832	7.06935	9.26584	7.61444	6.15387	6.11799	7.5353	4.26778	11.7755	7.32898	5.46635	9.06753	9.24082	8.9175	7.28805	7.31384	6.21222	5.25883	4.79061	8.88818	7.56567	8.16723	6.95681	3.7739	8.13075	6.92601	10.4442	5.10411	10.0557
PF3D7_0416700.1	10.4155	5.59516	12.4025	13.0672	11.0256	14.18	11.9461	12.0662	11.3132	11.7304	9.86411	7.54847	10.0659	14.3022	11.9235	9.65692	7.41484	12.562	11.619	11.9421	10.5497	10.6013	11.3805	11.6715	9.8348	12.037	13.8761	10.4979	10.101	9.32426	13.3893	8.80173
PF3D7_0416800.1	10.254	10.4625	9.91405	10.5471	10.9616	11.1894	10.23	10.3089	9.53153	9.97571	10.9165	9.88419	9.50626	11.6535	9.37912	10.7332	10.5137	10.0483	10.2792	10.0047	10.7895	10.1957	10.3581	10.5661	9.92406	9.67271	10.3694	10.8252	9.96638	10.1348	11.2986	8.64514
PF3D7_0416900.1	6.20447	6.34847	6.43342	7.89183	7.33495	7.08324	7.26717	7.76893	5.95954	7.14893	6.28941	5.74393	6.812	7.33222	8.84278	6.76919	8.4248	8.07322	8.03621	8.76692	4.92627	5.40619	7.65945	7.85911	7.34276	7.39428	7.29821	6.06426	6.26237	7.22194	8.88734	7.58282
PF3D7_0417000.1	12.3462	11.01	10.6051	9.66225	12.6379	10.1886	12.3998	10.1928	11.282	11.6081	12.7127	10.6226	12.8008	11.2416	11.2162	9.23462	9.845	10.9434	12.0519	9.04398	11.7886	12.6281	11.7451	12.5917	11.6094	10.9525	8.00958	12.3042	10.3155	8.07162	17.6384	11.1411
PF3D7_0417200.1	3.50707	2.26008	2.15288	4.43146	3.00824	6.51285	2.77326	1.54372	4.28647	3.88268	1.42144	8.79949	3.4369	2.65566	2.89222	5.54378	2.39184	5.15438	5.00864	1.96208	4.91215	4.11551	5.51307	1.02283	4.96829	3.00804	0.950539	4.22746	7.58611	1.11433	2.1843	3.46245
PF3D7_0417300.1	9.27228	10.5052	10.8092	8.66399	8.84537	8.1806	8.15005	8.18559	7.648	7.88793	9.36948	6.07532	7.37494	9.98708	6.32559	9.05501	10.3827	9.30751	9.53821	9.88472	10.4271	9.34939	8.85318	8.58955	8.21511	8.49694	7.25971	9.34433	8.54748	9.86433	10.2164	7.26816
PF3D7_0417400.1	10.7671	10.7102	11.241	9.99645	10.6607	9.9507	10.2865	10.8042	10.0623	9.80573	10.6171	8.53214	9.94654	11.3632	10.4073	10.1085	12.0329	11.4962	11.7091	11.8878	10.4746	10.2235	10.9803	10.8394	9.57861	10.2852	10.9383	10.4904	10.5032	11.506	11.29	10.2628
PF3D7_0417500.1	7.96933	12.8986	6.94232	4.00169	9.00744	4.76328	7.84044	9.24405	8.17826	7.76184	10.0204	9.16423	6.10664	8.48515	7.59739	8.13178	11.1224	8.40209	8.28961	10.5858	8.61544	8.83603	8.37099	7.9112	7.26195	6.994	8.36444	8.76794	6.98508	10.8433	6.27258	8.16862
PF3D7_0417600.1	16.7941	16.4955	15.7764	16.6845	13.2734	15.4211	17.4591	14.3149	15.1089	14.2142	16.239	14.5662	13.9712	16.2486	16.6462	15.0328	14.8356	15.3665	17.1143	18.3577	15.1047	15.1332	15.7977	16.2921	14.7898	15.7063	17.9995	16.9965	15.2322	17.6617	15.6962	17.0699
PF3D7_0417800.1	10.229	13.8527	14.1148	11.5753	13.0748	13.6752	9.68185	7.61874	7.49536	10.7261	10.0183	8.15075	11.6273	9.73197	7.35891	10.5305	12.4958	9.96044	9.0282	11.3962	13.3592	13.48	9.9024	11.063	10.5454	11.9668	13.2563	10.8507	13.3476	11.971	14.5939	8.73015
PF3D7_0417900.1	10.6027	9.41	9.24663	7.99984	11.5584	11.5781	10.2365	8.48955	9.22603	9.35042	10.9333	12.0988	7.87494	9.54593	10.2273	11.2923	7.84887	8.2223	8.23137	10.5766	9.77449	11.029	11.2622	9.63063	8.99606	11.0151	13.7325	8.68156	9.0912	9.9799	15.7262	8.40114
PF3D7_0418000.1	6.87243	7.20285	7.85462	6.03306	5.75624	6.84271	5.7225	6.15875	6.81746	6.1629	5.97037	6.22698	5.78356	4.31254	6.83296	6.14157	3.06378	6.28285	6.216	6.3331	6.03299	6.05577	6.15991	5.85017	6.81926	6.66472	6.93707	5.76089	4.92109	7.9754	6.44438	8.32534
PF3D7_0418100.1	6.58694	6.73588	5.88771	6.14616	5.15835	6.15884	6.03976	6.54323	6.3886	6.31917	6.70989	6.55868	6.88826	5.73676	7.01131	6.43665	7.1725	6.91086	6.89072	7.3627	6.13966	6.54923	6.2111	6.38335	6.97944	6.33006	6.87346	6.85158	7.29992	6.59022	7.38268	7.21294
PF3D7_0418200.1	7.22724	6.3108	8.30484	6.22828	6.19018	6.63872	5.80375	6.82926	6.49192	6.91897	7.16477	7.38032	6.80227	5.29372	6.96367	6.91415	7.44056	7.48098	6.93565	6.45976	6.58957	7.2238	7.03583	6.52709	7.04527	6.77266	6.9542	6.47588	6.68685	6.30594	7.91647	7.58323
PF3D7_0418300.1	10.0945	10.3687	9.73349	10.8543	10.4025	10.9469	11.5264	10.9994	10.4558	11.1511	10.0359	11.4065	11.4741	10.9465	10.8014	10.3861	10.6939	9.92975	10.5592	11.0677	10.4997	11.1194	10.5304	10.5337	11.316	10.5237	10.0253	10.3883	10.8942	9.52077	9.65245	10.2219
PF3D7_0418400.1	8.25224	15.0235	7.93912	9.4087	8.4545	11.241	8.44155	13.0146	9.74167	8.80513	10.5308	11.0215	9.17875	10.1481	8.99903	10.3734	14.651	9.04793	8.65795	10.1048	9.86182	12.6742	10.8848	9.49803	10.3648	8.10182	11.1837	11.0452	7.83209	11.3776	6.6394	8.74204
PF3D7_0418500.1	9.29148	6.50486	6.30153	13.7103	11.0547	6.18198	10.8129	14.8577	10.9402	11.5573	10.9746	7.46328	12.1152	7.77808	14.167	9.84164	6.15331	10.6259	11.2683	10.9404	8.87923	9.84933	12.3945	11.494	10.7034	11.5831	5.48931	10.6708	14.0123	10.5303	16.5011	15.7664
PF3D7_0418600.1	8.17657	10.8378	6.68233	6.46035	6.86426	7.55641	7.77755	5.24185	7.67643	7.80117	6.88929	8.22661	7.72305	7.27275	7.4007	8.71396	9.0975	6.6287	6.69552	4.99939	7.27641	7.72987	8.18277	6.5631	7.24082	8.61384	11.3824	7.61606	6.8289	6.33554	6.12996	7.02646
PF3D7_0418700.1	7.50345	8.65653	6.8757	8.57258	8.37188	8.48709	9.00088	8.5896	8.25232	8.7231	7.73195	9.14197	8.85271	8.26511	8.55672	7.77291	7.20427	7.76838	8.15161	8.35889	8.20231	9.05823	8.06746	7.74521	9.23656	7.84701	8.1309	7.90118	8.06132	8.06035	7.89886	8.1543
PF3D7_0418800.1	16.4923	21.2832	20.3408	18.1025	20.4827	19.7749	21.9311	18.3699	21.6577	21.2408	17.7782	18.5111	23.1889	20.0974	22.4443	19.3667	18.8286	20.6118	22.2321	23.1694	18.789	21.9701	22.3251	22.1493	20.9	21.6348	22.3852	21.9835	19.3943	16.2289	26.6374	20.5036
PF3D7_0418900.1	7.70115	12.2691	6.16686	4.59151	6.35427	5.61229	8.23409	4.69922	9.21383	8.09793	4.89828	4.97538	8.60587	6.59933	7.06287	5.72026	5.73452	6.69876	6.96287	8.04342	7.15413	8.33269	7.5996	6.58486	6.99825	8.34826	9.0779	4.9697	6.3592	4.2231	5.85278	7.27771
PF3D7_0419100.1	2.58355	0.193572	0.858112	3.83254	1.71211	2.45902	1.35324	-0.0448729	2.95998	0.792568	2.51058	5.31495	1.11365	2.37211	0.603488	1.71264	-0.700645	0.978062	1.70365	-1.63408	2.8366	1.4701	0.269096	-0.266812	3.76624	2.15323	-0.717967	2.68864	1.3764	-1.30661	0.0674951	0.493128
PF3D7_0419200.1	6.1289	5.5165	6.4214	8.15143	5.38239	7.50434	8.19342	3.45348	8.93742	6.77733	6.30552	4.2374	8.04928	6.29867	8.9067	5.72385	9.3528	6.91486	6.29293	6.59432	5.14335	6.41217	8.19704	6.94076	6.77796	7.14227	7.80536	7.46721	6.52455	8.94905	10.6605	8.82341
PF3D7_0419300.1	4.89024	8.41988	3.27633	2.63001	2.65398	1.17472	4.39057	5.84134	3.92606	2.72247	5.5368	6.61639	3.9143	4.24338	4.44956	4.46145	8.99705	5.0978	4.33373	6.20335	4.28947	6.62223	4.43505	5.03128	3.87172	4.06493	5.69142	5.3653	3.755	4.95971	2.23085	4.61391
PF3D7_0419400.1	3.57798	1.82994	2.23172	4.2287	3.28057	2.99942	3.11124	4.56239	4.60143	3.7481	4.344	4.75062	4.32423	3.16245	3.16403	3.57428	4.45049	2.15961	1.69024	3.40036	3.99847	3.40859	0.165786	3.13163	4.60802	3.02771	4.67045	3.41305	5.89732	3.23177	1.37817	2.76937
PF3D7_0419500.1	4.54702	7.06119	1.82873	4.90838	4.45083	4.29349	3.44323	5.30205	4.45867	4.11813	5.39802	6.28481	4.33293	1.96465	5.53716	4.93535	8.19933	5.21313	4.7289	4.1824	3.73257	4.87125	5.60849	4.9882	5.49278	4.07295	2.4626	4.3209	6.57365	5.99187	6.03184	6.99939
PF3D7_0419600.1	9.81683	10.6524	9.88458	10.0002	9.30089	9.60918	10.6917	9.64373	10.7829	10.1168	9.78829	9.84041	9.75437	9.75758	9.18796	9.72392	9.47781	9.63504	10.0935	9.93161	10.7002	10.5351	9.94634	9.4536	10.4127	9.14225	8.39029	10.4808	10.381	8.95938	8.84242	10.0748
PF3D7_0419700.1	7.26237	8.62535	9.39471	6.58531	5.88035	6.79198	6.58667	5.85509	6.67148	6.40773	7.47531	5.93361	6.16396	7.19255	4.44265	7.29547	8.07044	8.03862	7.29363	7.05831	8.95635	8.54764	6.84645	6.36231	7.01609	5.66723	5.42515	7.80029	6.71189	7.95189	7.6291	5.99741
PF3D7_0419800.1	7.74471	6.87819	8.25206	7.45859	5.73952	5.37293	6.84019	7.84658	8.17223	7.82491	7.09342	6.37731	7.39218	9.04985	8.21861	6.77096	8.311	7.57513	7.21882	7.22434	5.83099	7.50898	7.8449	7.35628	7.60219	6.56664	6.247	7.63298	1.17068	7.65513	8.7743	6.74801
PF3D7_0419900.1	9.45114	9.2376	8.1174	7.55466	7.73945	7.89797	8.36011	9.30837	8.2037	8.5451	9.20156	8.03671	8.82014	9.22551	9.42487	8.78554	9.90912	9.94633	9.81771	9.98016	8.46224	8.33431	9.17999	8.95171	8.16481	8.96701	9.32197	9.29022	9.2657	9.83952	9.44205	9.27844
PF3D7_0420000.1	7.54731	7.26055	7.10575	6.67551	7.60481	7.63042	8.42407	7.55966	8.245	8.03262	7.238	7.91637	8.36246	7.90248	7.91645	7.13466	7.84219	7.38649	7.91687	8.23721	7.63214	7.98253	7.35824	7.49132	8.11626	7.90925	7.42168	7.00284	8.13485	7.1458	7.55374	7.35409
PF3D7_0420100.1	9.72012	8.74991	11.7344	8.22711	9.18589	9.52223	8.31877	9.16074	8.95309	8.74608	9.42345	10.0719	8.97819	7.22222	8.17215	10.2388	10.643	9.4678	9.78088	9.90437	10.4759	11.3464	9.29185	9.21187	9.45526	8.53407	9.95996	9.36437	11.401	9.41584	12.602	9.23793
PF3D7_0420200.1	8.26296	11.9376	5.84575	9.30938	9.51499	8.42547	8.9334	4.55042	9.35261	8.87805	7.12223	11.8168	10.1516	8.28657	8.57288	8.93923	9.77099	8.26312	8.11528	9.38455	8.35847	7.96027	7.65034	8.78666	9.20737	9.08177	11.246	7.73297	11.421	3.39228	5.21707	7.6297
PF3D7_0420300.1	11.464	11.5535	12.1246	9.84414	10.3332	9.96855	12.0509	9.82293	8.48921	9.14071	11.469	10.0574	9.79649	10.8446	10.6078	11.3271	12.3566	11.9928	12.7078	12.5468	10.8048	10.2569	11.8552	11.644	9.49	10.1965	11.4165	11.6807	11.6102	11.5621	12.3076	11.2836
PF3D7_0420400.1	10.8925	16.1765	9.99653	6.04429	11.3103	11.8725	12.0512	7.09664	10.6042	9.33544	5.81364	7.91323	9.8279	11.6843	7.4659	8.53424	11.9647	10.608	10.9629	10.7566	12.358	11.4783	10.3897	8.08014	10.1766	10.0135	10.3478	10.8783	10.5737	12.5486	7.80053	8.07488
PF3D7_0420600.1	10.0438	9.7456	14.7373	8.19293	11.3501	12.1033	11.0815	13.1703	10.1741	10.075	12.4268	9.76051	10.8445	11.0819	9.61852	10.822	13.8292	10.8749	10.5722	10.2771	11.5056	10.9931	11.2969	11.3988	10.623	11.4937	7.14033	11.2497	9.36793	13.8414	9.64155	10.7572
PF3D7_0420700.1	2.38028	7.68501	3.80915	5.59698	3.82853	6.77406	3.6792	0.728311	2.51535	3.06829	0.621151	1.44754	4.37335	5.39002	3.89377	2.28157	5.26316	5.61066	6.09783	5.55865	3.49561	3.33128	5.12699	5.75857	2.51262	4.80073	4.42796	5.69391	4.34007	7.09514	2.39306	4.28367
PF3D7_0420900.1	1.796	8.78124	3.07747	1.43314	3.10812	2.11469	8.0361	5.10459	3.86767	3.50754	4.56068	1.08284	1.28254	1.99009	5.99366	2.67922	2.15066	8.09176	9.20153	9.21987	3.85644	6.65088	7.07966	5.8278	4.02284	4.76852	6.6112	3.73458	7.64405	1.43691	10.1338	7.20288
PF3D7_0421100.1	8.86231	10.4069	6.82381	6.94399	7.24761	6.17688	9.1604	5.26792	5.06108	7.36411	9.65512	6.25654	8.5689	9.12296	6.64858	9.70621	12.1294	8.55886	9.49497	6.81158	9.08022	6.60427	8.85114	9.40333	4.47314	7.6168	9.88845	9.65749	12.5461	9.12717	6.23391	7.84665
PF3D7_0421300.1	5.08684	8.19862	5.62062	5.1362	3.0657	5.01994	4.63254	3.15891	0.579089	3.26827	6.41039	4.4939	2.75559	4.00624	3.28662	6.74953	6.61097	6.19643	6.84794	5.11125	5.79034	6.05788	5.5054	5.91567	4.29195	4.76069	6.24996	6.39855	6.47524	6.4578	9.85579	4.67092
PF3D7_0422000.1	5.92959	8.48113	9.81109	4.67115	5.16763	1.91646	4.47737	5.76292	3.04923	4.87529	7.6107	2.20945	4.69369	2.48383	5.13114	6.07362	8.91851	4.98745	5.63688	6.83581	4.88404	5.83576	6.58366	5.34363	6.1532	6.38705	5.17909	6.33866	3.20126	4.63558	10.1919	7.66152
PF3D7_0422100.1	6.6367	7.92406	10.3629	6.22719	5.46754	5.33641	4.3572	6.58698	3.30522	4.32973	6.71761	4.25447	3.99787	6.88478	2.73728	6.53402	6.44475	6.83317	6.24948	5.89177	7.40136	6.96162	6.15551	5.67421	4.9603	3.69887	4.62476	6.60227	1.93287	7.08091	5.49499	4.05183
PF3D7_0422200.1	8.02634	8.1202	9.26025	7.4992	8.07097	8.23242	9.44195	7.54211	7.12076	7.83892	8.15569	7.50036	7.43754	8.67442	8.60597	7.64195	9.65814	9.89316	10.0214	9.93387	7.98104	8.27939	8.8521	8.71152	7.71941	7.61427	9.03481	8.22047	8.49477	9.4796	9.67865	8.44346
PF3D7_0422300.1	8.69889	9.75441	8.41547	9.48569	8.63749	8.34577	6.69013	8.0337	6.65355	7.58845	9.36797	8.57351	7.90578	8.49878	5.64214	9.6154	7.11959	7.50619	8.70083	7.01077	10.5403	9.9062	8.21484	8.25476	7.45463	7.13424	8.2583	9.0622	9.79794	7.76228	8.89745	6.63288
PF3D7_0422400.1	7.1493	7.46521	8.32521	7.97421	8.04201	7.66851	8.18305	7.75403	8.08105	7.58712	7.58696	7.36221	7.62376	7.22719	7.53098	7.43651	7.73075	8.11226	7.69802	7.45945	7.84753	8.05567	8.3285	7.62984	7.56429	6.69123	6.96256	7.72733	7.72426	7.53812	7.5588	8.14421
PF3D7_0422500.1	6.79853	6.68878	6.88584	7.33791	7.37377	7.37186	7.99072	7.25112	6.6573	7.70329	6.72164	8.03806	8.37721	7.55489	8.09783	6.99685	7.14618	7.29108	7.64005	7.62627	6.55767	7.0998	7.29483	7.48185	7.91989	7.35785	6.94088	6.93167	6.63717	6.95592	7.4559	7.31941
PF3D7_0422600.1	9.02396	6.1526	14.4994	6.65832	9.81027	11.0329	8.14213	11.8598	9.37984	8.90106	10.1033	12.651	9.50149	9.03889	8.3627	8.70858	11.3445	8.89393	8.47207	8.39932	9.78351	10.8857	7.88326	10.4399	8.82958	8.31655	9.06443	9.91076	6.77706	10.6163	5.67617	8.17113
PF3D7_0422700.1	4.7567	5.91286	7.27597	4.67858	4.21118	5.63195	4.44307	4.50894	4.49771	4.27861	4.5506	3.83742	3.89155	4.7427	1.42484	5.503	2.31173	4.7384	4.85077	4.60747	7.39747	6.67629	4.27919	4.3448	4.83666	3.68687	2.88091	4.74333	5.08694	3.89483	4.89688	2.95361
PF3D7_0422800.1	4.28891	6.93815	6.98217	5.29718	8.49173	9.82528	8.28943	5.68226	7.12777	8.87362	4.80196	6.12539	8.52408	7.40125	7.53891	5.0999	5.46078	6.34147	7.22955	4.88038	6.6597	7.75879	7.96003	7.54247	6.43786	8.79726	9.21437	8.10506	7.15073	4.47726	6.18501	6.30993
PF3D7_0422900.1	4.34794	2.86509	9.39529	1.03776	5.70642	6.12444	5.09773	6.65277	4.73203	4.16258	6.59037	9.0024	5.16969	4.22488	4.10984	7.42321	2.28775	4.762	3.45852	6.56782	5.71805	3.57464	1.10554	5.57219	5.95716	3.09497	7.34496	5.17713	3.45056	8.12251	2.58586	3.95514
PF3D7_0423000.1	6.71956	10.5784	11.6105	6.95948	5.73002	6.16074	5.98624	6.88078	6.60529	5.95397	7.30407	4.17106	5.38974	3.28666	6.87793	7.20553	9.5624	7.62229	7.39096	6.55865	5.66437	7.29804	8.25421	7.44845	7.74927	5.99509	7.45655	7.35533	3.36229	6.60987	9.87276	9.53914
PF3D7_0423100.1	6.78031	7.9726	6.41658	7.12839	6.90955	6.78307	7.34606	7.24705	7.59348	7.65464	6.01706	5.48225	5.93816	7.26636	6.73541	7.00443	5.43307	6.355	6.87411	6.42109	6.95444	6.5914	6.76405	5.67858	7.59813	6.41283	7.27196	6.69984	5.55906	7.76113	6.49382	6.77855
PF3D7_0423200.1	8.12004	4.49426	5.6645	6.84726	4.60961	8.62007	6.65914	6.6366	8.21153	6.53021	9.15568	8.40451	7.01608	4.89202	7.21448	6.74684	8.8813	7.98722	6.64358	7.56045	8.57235	9.13203	6.81896	5.81416	7.48176	6.01546	7.52375	8.53863	12.9672	9.25769	10.3005	8.7616
PF3D7_0423300.1	13.3885	10.5882	17.4025	9.21782	10.9016	13.5251	13.7228	12.7356	13.3469	12.6306	14.4516	14.5057	11.1628	8.6825	10.9423	14.7675	13.7604	12.2339	12.0125	13.0538	15.0465	15.3637	12.7301	12.5571	12.3249	10.1098	12.8127	14.1139	16.2461	15.1334	15.3649	14.2592
PF3D7_0423400.1	2.37704	-2.09746	4.91627	2.41572	2.80358	-1.21486	2.63308	-0.814557	3.59561	2.79369	2.73347	4.86	1.47931	1.17385	3.06916	3.39571	6.47768	0.804166	1.71881	2.42661	1.27381	2.31177	3.93282	-0.258336	2.90606	-1.07334	-0.281567	3.20403	-1.07864	5.45341	6.01031	3.45602
PF3D7_0423500.1	13.3005	13.8575	14.0092	11.6715	15.8441	15.369	14.769	16.5427	15.4343	15.665	14.4215	13.2619	15.335	13.6879	16.3247	12.9723	15.3168	12.5783	14.1971	13.5126	12.7253	13.7611	15.2129	14.739	13.5239	13.9795	17.0984	13.8229	13.3921	15.1339	12.2493	15.5782
PF3D7_0423600.1	8.87445	9.09936	8.09262	8.93492	8.84752	9.46121	9.56226	9.54385	8.99807	9.43065	8.82821	9.67944	9.43795	8.99203	9.85091	8.30545	9.11548	8.43338	9.07908	9.5135	8.45976	9.87306	9.18894	9.33283	9.4906	9.05078	9.54126	8.77503	8.55856	8.53785	9.65121	9.09901
PF3D7_0423700.1	6.29492	10.5738	9.74795	7.59403	7.35532	2.71873	7.21254	3.40865	6.81926	6.48029	8.533	3.80986	7.10374	2.68466	5.72259	6.71772	9.45248	6.10894	5.16476	8.22561	7.63532	8.31143	5.97309	7.76894	6.55124	7.23847	8.31297	6.60324	9.06706	7.20768	10.516	9.46673
PF3D7_0423800.1	-0.112876	1.81539	1.76758	0.466086	0.500305	0.568819	-0.314068	-0.771654	0.102048	0.290852	0.810995	1.17841	0.583602	0.627354	-4.15654	2.00043	3.8067	-1.35034	-2.04588	0.101513	3.90702	1.69689	0.853572	-3.5394	1.33942	0.63444	-5.40483	0.861869	2.86198	0.161717	-5.39254	-1.46389
PF3D7_0423900.1	3.9172	1.30433	1.08301	0.642688	7.94612	9.68059	8.95585	9.26466	9.55746	8.25962	1.03376	8.6846	9.24234	3.37416	8.04684	2.06668	2.66471	1.7062	4.13987	2.20712	4.56554	7.11193	5.86858	6.21674	7.06494	8.63908	1.13128	4.56506	9.37557	0.670247	2.23953	6.55459
PF3D7_0424000.1	3.70609	0.757529	0.947684	5.66871	5.19497	5.1773	4.95804	4.98149	4.79846	4.52291	3.57445	4.36591	4.03543	7.1908	4.21214	3.90319	0.353051	3.01433	1.55676	2.67446	3.74386	4.4257	2.77369	4.54658	4.16127	3.3954	4.67777	3.45569	1.35445	3.02162	7.45745	0.358546
PF3D7_0424100.1	2.43779	-2.386	2.19843	4.9328	1.59734	3.03665	4.20462	3.99839	3.09685	3.98827	1.03671	0.319021	2.93133	4.8186	2.58441	2.25351	-0.543579	0.705235	0.525948	2.18284	2.28995	0.904724	-0.19516	0.435166	3.6292	4.60599	4.844	1.32242	2.84179	-1.52552	-1.15068	0.0506571
PF3D7_0424200.1	5.08102	6.88121	5.36351	1.98727	4.33136	3.19633	3.7424	3.86868	2.70486	2.51787	4.22234	2.5889	2.02972	2.39511	0.765418	5.56842	6.95149	3.30697	3.64291	4.43694	6.3087	5.5711	2.27046	3.77574	3.39845	1.89547	6.19899	4.4094	7.15074	6.15549	5.99623	2.54865
PF3D7_0424400.1	5.10544	5.10435	3.50231	3.59403	2.98782	9.15489	4.90968	6.34142	6.64335	5.06985	5.18565	4.83884	6.63305	4.98636	3.4579	5.47579	2.68839	2.70954	2.09724	4.83288	5.9129	6.07516	2.88778	4.24375	7.99726	5.04621	3.70219	4.19574	4.73843	1.80353	6.83005	2.24599
PF3D7_0424500.1	6.64683	6.73539	6.50944	6.69142	7.10998	7.2722	7.34563	6.68995	7.18297	6.99509	6.48628	6.97371	7.59291	6.44195	6.60201	6.85341	6.00039	6.19758	6.31944	6.26582	7.28779	6.91264	6.34659	6.37429	7.34959	7.13881	6.71642	6.9009	7.85052	6.63357	6.18014	6.9117
PF3D7_0424600.1	5.21775	4.13829	3.88437	5.51549	5.93009	6.9359	5.6262	6.00005	7.19242	5.23541	5.18214	6.86166	6.11961	6.10416	5.50963	5.19913	4.64219	4.54975	4.34748	4.06208	5.47053	5.4272	4.55676	4.99336	6.57428	5.4376	4.4693	5.27199	5.03822	4.83985	4.73244	4.38099
PF3D7_0424700.1	10.9068	9.68894	10.9009	9.35306	9.94341	11.3243	9.04961	10.2916	9.14406	9.69842	11	10.6762	10.3396	11.0141	10.4551	10.9679	10.0326	9.65112	10.2496	10.5984	9.94516	9.88353	10.7959	11.2633	8.7725	11.3849	12.0351	10.8908	9.53641	10.548	10.8389	9.55898
PF3D7_0424800.1	3.93479	2.649	4.65616	6.60711	6.74499	8.45341	6.23204	5.4124	6.49465	7.00053	3.62125	6.9521	7.18185	4.1185	6.97077	4.08153	-1.47328	1.55023	3.53894	4.92876	3.90928	4.0875	4.14951	5.31286	7.19759	7.33956	4.22031	3.07983	3.90428	3.68359	3.20451	6.20302
PF3D7_0424900.1	5.22602	4.3406	5.373	5.94962	5.70122	6.06412	6.38403	5.56733	6.78414	6.30349	6.59347	6.25753	6.70958	6.98803	5.81512	6.00103	4.63728	5.31213	5.19444	4.68968	5.88016	5.32279	5.59838	5.28772	6.28292	5.69483	4.78498	5.60323	4.67679	5.25336	4.93269	5.06494
PF3D7_0425000.1	0.724136	-2.88687	-2.32407	-0.821704	0.644486	-4.0062	-0.805055	-4.60516	0.899072	-0.81734	-0.02046	-4.10256	0.936183	-1.1691	-1.52505	-3.51664	-2.68617	0.192155	-1.86416	-3.35618	0.59195	-2.21174	-2.94725	-3.07786	-2.68202	1.53036	1.26861	-3.6748	4.56519	-3.72434	-3.04199	-0.646385
PF3D7_0425050.1	4.46703	0.00373694	9.49683	3.57963	4.88531	4.83432	1.95427	2.19339	3.82074	2.5579	6.11177	5.77588	3.24017	3.08034	1.9645	-1.02432	-1.59148	5.06171	4.83638	4.54459	7.71891	11.3769	4.66054	2.24423	2.68582	4.01496	2.6943	3.97474	2.56816	7.04099	8.99598	3.901
PF3D7_0425100.1	-0.643354	-5.16361	-4.52894	1.58335	0.422442	1.02743	-0.02398	0.350811	1.89213	0.796294	0.522246	1.45969	1.3733	2.40658	3.28554	0.564041	0.893943	1.09146	0.140951	1.34002	-0.352906	0.632811	2.55228	0.548994	-1.61134	2.29237	1.05526	1.28043	4.22632	4.09042	4.07294	0.782978
PF3D7_0425200.1	0.481226	2.04134	-3.77852	0.264217	0.678375	1.99756	0.331035	1.1798	0.8876	0.18187	0.018876	3.57065	1.13855	-0.579675	3.10715	1.24955	2.39437	1.23074	0.328515	2.96981	-0.597364	1.61378	1.00585	2.31609	1.63038	2.20172	1.56442	0.513446	3.27883	3.64332	5.53613	1.94657
PF3D7_0425400.1	-0.821559	-6.10047	3.59985	0.480301	-0.290919	0.930771	1.02911	-1.42138	-1.77338	0.128608	-1.2571	2.2845	0.733484	-0.725827	0.674317	-1.53674	2.45797	-0.215114	-0.953287	-1.8376	-1.72648	2.79064	2.42811	0.501995	-0.645067	2.34339	-1.18535	-1.47036	-2.36851	-6.79732	3.37712	-1.58239
PF3D7_0425500.1	8.457	14.8386	7.23606	6.79157	6.23732	7.4804	7.6209	6.9784	7.15908	9.80648	6.32337	7.24119	6.96042	7.70401	7.16667	10.5577	7.05154	9.28096	9.70492	6.73704	7.73539	6.94034	9.3494	10.3518	7.78088	10.8902	5.4413	6.45651	7.3776	5.66349	7.36406	8.27474
PF3D7_0425800.1	11.1209	11.3994	7.39256	10.8703	9.07614	6.52603	13.2888	10.2976	7.34241	9.3358	11.4184	10.5556	11.7865	12.4922	12.1273	11.4878	11.9502	10.813	11.7017	11.1362	9.33986	8.20736	11.0028	10.5406	8.70037	12.4331	13.9022	11.5468	12.4262	8.7448	5.96579	11.0979
PF3D7_0425900.1	5.33864	7.56988	7.92711	4.95663	6.0224	5.02804	3.1984	4.29708	4.46146	3.98762	6.36722	5.8079	3.48682	3.84769	3.0815	5.35715	6.07008	3.98309	3.44224	5.25146	5.99324	7.70088	6.0772	4.71138	4.98993	3.17201	5.34677	6.18597	1.6087	4.22677	8.25462	3.99664
PF3D7_0426000.1	6.31968	7.91207	12.5243	6.70761	5.59725	4.97074	4.77198	5.33709	1.41446	4.62073	7.05772	2.03859	3.52415	6.18854	2.84753	6.56339	8.93598	8.09088	8.4104	6.77149	7.64066	7.28312	6.4753	6.72516	3.7971	4.57613	8.28501	6.95727	5.24389	7.23058	7.75802	4.78508
PF3D7_0500100.1	8.52029	12.5862	6.26558	9.5548	5.93691	6.38686	7.52485	5.33916	5.85179	6.20139	9.23065	3.48057	5.70151	7.07946	5.99793	8.83922	9.61751	8.83985	9.21339	6.66847	9.07264	8.26924	9.27002	8.25484	6.04492	8.38202	8.45791	9.21954	11.272	8.28103	11.5382	8.56994
PF3D7_0500600.1	1.70003	10.4178	3.191	7.45309	7.4178	3.0063	5.93579	3.49565	7.93939	6.25558	1.97092	3.95057	3.20583	3.86283	2.91907	5.58032	2.83116	1.99885	2.57309	2.43446	4.84675	5.19023	2.18461	7.12536	6.46785	6.99766	2.48899	2.15103	3.55053	1.98424	3.19771	3.36906
PF3D7_0500800.1	10.6491	11.6877	12.0527	13.7037	17.3762	11.5603	11.5737	13.4909	11.3022	15.1039	10.5842	12.1933	11.5863	11.4728	12.0818	10.8074	9.5767	9.69864	10.2371	11.309	11.9057	11.8871	10.4697	13.4005	11.5161	12.0078	13.4712	11.3835	12.0619	10.8938	10.4374	11.5879
PF3D7_0500900.1	7.69145	6.46505	7.1725	7.07223	9.47291	8.42334	5.91666	5.18333	8.44178	6.64381	7.05217	6.03085	7.97005	8.89364	5.1244	5.86747	3.75051	5.23786	7.65485	3.07414	10.2622	8.55095	8.08027	2.44944	6.97693	8.40343	7.80919	9.32554	7.7189	7.98148	5.52783	5.77555
PF3D7_0501000.1	10.7071	9.79709	10.1424	11.056	12.0697	11.3335	9.67888	12.1406	10.1499	11.3185	10.8917	9.56898	10.9511	11.5427	11.149	10.2516	10.6272	9.86719	10.1936	9.76199	10	9.52204	10.7901	10.9883	10.2492	11.0693	10.8586	10.8774	9.66376	10.275	10.4039	10.2105
PF3D7_0501100.1	4.79651	4.86075	5.8984	5.99602	6.70297	6.08705	6.73726	5.83782	6.7842	6.03442	5.31733	6.55633	6.36686	5.93855	5.44496	5.37689	3.71418	5.53034	4.78194	4.933	6.41994	6.71839	5.45282	5.38789	6.35776	6.22665	5.08925	5.63253	5.60736	4.58652	5.19875	5.19923
PF3D7_0501100.2	4.56567	4.77452	5.52335	7.04788	8.13604	8.29658	7.41511	6.76171	7.27513	7.28909	5.37277	6.80833	7.52122	7.38827	6.63102	6.3695	4.82902	5.54308	5.48471	5.50074	6.08557	6.45411	6.36653	6.38641	7.58761	7.18441	5.73398	5.16453	5.80041	4.26681	6.87356	4.76703
PF3D7_0501200.1	9.25189	11.1136	3.91509	11.0402	12.0564	11.5171	8.46161	9.39908	8.46432	9.68988	9.63821	10.8512	10.0682	11.8392	9.38316	9.67172	10.4474	7.70541	8.20747	7.87867	9.17293	8.46811	9.21771	10.8659	8.8532	10.9505	10.0015	9.57544	11.0828	7.44381	8.61325	6.84928
PF3D7_0501300.1	12.8528	13.0147	12.2564	11.9472	11.024	11.8891	13.0709	11.9007	12.742	11.7136	12.3832	11.8971	12.0043	13.0027	11.8463	12.6976	12.475	12.8889	13.2798	12.9171	12.8695	12.7243	13.0116	12.5832	11.7582	11.6711	11.8366	12.9518	12.7138	11.759	12.33	12.0965
PF3D7_0501400.1	7.57451	8.95157	8.19204	9.61294	11.1223	11.064	12.4911	10.0327	11.2326	10.3756	8.25214	9.17001	10.8934	10.0711	9.89894	8.79174	7.8759	8.65601	9.14563	9.36982	9.52911	9.32081	9.22186	9.01097	11.2884	9.49606	8.6391	8.35003	10.2939	7.56471	7.83129	9.03389
PF3D7_0501500.1	5.13214	4.50267	4.89095	4.9688	7.37253	8.06358	7.07347	6.2843	7.4808	7.28599	5.17579	9.32344	8.69639	5.35743	6.96845	5.05609	3.2251	5.09456	4.2272	2.36957	5.36116	7.39627	5.98646	5.92165	6.61703	7.56625	7.26411	2.33558	5.21545	1.87821	3.43379	5.09892
PF3D7_0501600.1	2.88713	7.04134	1.35245	3.03278	2.82304	3.19829	2.1919	-1.62805	3.71217	3.95754	2.68279	4.86342	4.55759	2.08535	2.59568	2.45148	0.337788	1.47078	0.870518	3.61598	2.4469	1.64639	-1.1343	3.50842	4.19407	3.3385	5.80594	-0.408416	1.98881	3.09015	0.239462	2.29429
PF3D7_0501800.1	10.109	8.07841	7.94122	12.1963	11.3802	12.695	11.1439	10.0037	10.6369	11.7688	10.0352	10.5446	12.5676	12.7628	15.0298	9.71474	11.6383	10.0534	10.5109	11.0413	6.93333	7.79954	11.5604	11.46	10.6598	11.939	14.1699	10.2046	7.85988	12.8687	11.9852	11.352
PF3D7_0501900.1	6.50326	7.93856	7.62119	6.40659	3.69084	5.10951	4.33923	6.48709	5.61256	5.36976	5.41609	2.05321	5.24936	5.73381	4.52777	6.05768	1.69158	7.63497	6.95039	7.45154	6.97996	6.61466	6.47767	6.02509	6.36885	6.18897	0.9998	5.76047	3.54211	8.57848	10.2065	6.74355
PF3D7_0502000.1	6.86387	7.67759	7.39323	5.29343	5.0888	4.48911	5.419	6.07263	6.15615	5.93049	6.31732	5.02104	5.70509	5.28174	5.74418	6.34814	6.15794	6.80628	6.74702	6.641	6.4011	6.86164	6.62974	6.18306	5.67387	5.72408	6.03023	6.09387	5.35832	6.59224	7.43366	6.87754
PF3D7_0502100.1	8.02999	8.41541	8.02396	8.7734	7.90217	7.28887	8.64254	9.02381	8.75603	8.64393	9.33124	7.61783	8.65242	8.4883	10.0232	8.33826	10.6416	9.59389	9.78142	9.65064	7.42744	7.77448	9.08539	9.67119	8.62311	8.87862	7.68391	9.10591	8.79647	9.49619	10.1786	10.0855
PF3D7_0502200.1	9.63577	12.7735	12.2769	8.719	7.43181	9.01233	7.61052	3.58244	7.44855	6.83882	9.02188	4.1759	6.67466	5.72349	5.08779	8.50353	7.34799	9.08888	8.97011	9.2309	10.9821	8.63096	8.10625	7.82082	7.71674	7.26073	8.80887	9.54948	10.7909	10.3254	11.271	9.76188
PF3D7_0502300.1	16.722	24.187	17.7637	14.9292	16.49	19.62	19.12	15.9059	19.4937	18.6995	17.175	16.5009	20.0694	18.9869	16.2927	18.4263	14.5042	18.4697	17.664	19.5326	19.9998	19.9199	18.4631	18.2112	18.0549	18.4943	18.8619	17.4857	17.4684	18.6644	16.6545	16.9985
PF3D7_0502400.1	5.80715	7.35445	6.92037	6.77972	7.72888	7.38207	7.83659	6.89338	8.13862	7.33109	6.40301	7.17259	7.53834	7.34437	7.77056	6.52859	7.12103	8.14468	7.66771	7.08614	6.91062	6.93408	7.15516	6.70784	8.04407	7.47076	6.97013	7.4932	6.98907	7.65985	6.6461	7.57249
PF3D7_0502500.1	11.4464	8.90222	8.71288	6.87637	9.28131	11.5316	10.1521	11.8048	11.1821	10.7217	11.2207	11.5552	10.2338	9.76237	9.99385	12.0412	8.17994	9.32855	12.6824	7.045	11.6827	10.5284	10.4446	9.75859	9.09064	10.8876	12.2181	9.33211	14.7778	10.8209	8.67548	10.2795
PF3D7_0502600.1	10.3496	8.64727	15.2351	11.4472	10.2146	7.03135	10.4886	10.5028	11.0851	9.68338	10.6885	7.56881	9.17537	10.227	9.19619	10.7218	13.2123	9.31592	10.4204	9.54656	10.435	9.87203	9.74759	9.98057	9.64001	10.4539	10.3152	10.9462	8.57733	9.58237	8.34964	10.3434
PF3D7_0502700.1	6.10529	5.21667	5.66124	6.2764	5.04961	3.22448	6.05616	3.50391	5.29507	5.84641	6.7995	4.19631	6.78081	7.02931	5.81079	5.29372	3.74714	7.00269	6.25674	5.99748	5.83283	3.29075	2.397	6.03659	5.38909	5.87788	7.28244	4.90653	5.94452	8.63922	4.62279	5.85416
PF3D7_0502800.1	10.4033	7.84533	8.22237	12.3781	12.1035	10.7774	11.3211	14.1152	12.1	11.1268	10.2907	14.6134	11.5664	11.7845	14.7466	8.70667	7.04606	12.2371	10.9544	10.5206	9.03802	10.8814	11.0424	10.8864	11.115	10.8494	12.0437	10.9428	8.41232	13.2479	8.08726	12.879
PF3D7_0502900.1	7.48119	9.37485	2.04113	9.35414	7.9219	9.90833	8.12501	3.96323	7.74896	7.96694	7.8207	4.55757	8.61683	12.8756	8.81269	5.14541	3.38581	8.49101	7.79497	7.53414	6.9695	6.31664	9.52879	2.99543	9.13731	6.87728	9.30904	7.06708	2.30726	9.05267	10.6609	5.37531
PF3D7_0503000.1	16.3949	18.1954	17.8641	19.2435	18.9559	20.3495	20.2611	16.4841	19.7925	17.7378	18.0262	17.1486	15.1496	18.8049	18.8586	17.2074	15.4365	18.4378	19.4215	18.4843	17.3764	18.6406	19.8578	19.4964	18.3651	19.1194	19.3439	18.5576	16.9974	13.2654	22.8911	17.2675
PF3D7_0503100.1	5.87296	4.43298	4.61143	7.34861	6.02024	6.59343	5.53127	7.76653	5.89596	5.41336	6.00386	3.39711	4.88041	6.02334	5.20047	5.01003	9.06326	7.74011	6.80745	7.47656	7.07059	7.1027	7.08317	6.26549	5.24993	3.49449	1.90574	6.69298	9.80694	9.3226	9.07262	6.49483
PF3D7_0503200.1	15.7976	16.1042	16.3463	14.9711	14.9592	16.8215	17.3223	17.1118	16.4454	16.035	16.9963	14.5258	15.4821	17.7111	14.6602	15.9811	18.4604	15.8716	15.9443	16.2475	17.0992	17.0223	16.9986	15.3702	15.9242	16.0743	14.101	16.0903	16.2693	15.0079	14.5536	14.5284
PF3D7_0503300.1	7.96942	8.56275	6.96662	8.41764	8.45087	8.63885	9.40608	8.34275	8.50226	8.88471	7.29118	8.44268	8.55632	8.45576	8.38567	7.8253	8.29199	7.83784	8.41692	8.28155	8.26665	8.57611	8.40789	8.38763	8.6281	7.69031	7.27618	8.2188	8.88697	8.017	7.73418	8.24361
PF3D7_0503400.1	10.2235	8.56608	15.8455	8.49097	8.94677	10.992	10.9101	10.2218	11.8252	9.16812	12.3115	9.98056	9.77622	10.4823	7.09828	9.49839	11.507	10.0585	9.96745	9.99934	13.3204	13.5448	10.3784	8.92231	9.45074	7.66493	8.77724	11.1871	9.5325	11.5549	7.44819	9.21541
PF3D7_0503500.1	6.68615	10.1945	4.7737	5.32769	9.02329	9.64357	7.70136	5.40605	8.12498	8.4742	7.60121	8.29686	8.33816	11.6119	6.74104	7.94237	4.50745	5.83763	6.84984	6.20792	7.77995	6.29089	7.33537	6.40025	7.72327	9.81705	10.2909	6.73749	4.73721	3.60423	4.7084	3.1755
PF3D7_0503600.1	3.29086	5.69151	0.745054	5.12233	5.07195	4.71228	3.12447	4.40261	3.32086	2.72587	2.35917	3.48128	3.23431	7.18701	2.27397	2.44461	4.84718	1.71978	3.05176	4.15699	3.91056	3.52835	3.70794	3.50398	3.80041	4.25385	-1.00824	3.88904	1.17506	5.05987	0.216313	1.02536
PF3D7_0503800.1	8.67602	10.8482	12.8755	9.10745	9.11661	9.51569	8.40754	8.34504	8.49233	7.5358	9.74869	7.98023	7.62889	8.7035	5.31653	9.9537	10.2997	10.2297	9.67219	9.67198	11.9578	11.0926	9.51545	8.64747	8.76357	7.05315	6.36516	9.6735	10.0011	9.98867	9.39887	7.89528
PF3D7_0504000.1	6.4866	8.06418	7.97946	6.83639	8.7866	7.32013	5.29797	4.33537	5.41129	6.84724	6.87699	4.98641	4.95494	5.4722	7.38452	5.69509	7.779	7.65446	6.81978	7.90207	5.29626	5.32283	8.06676	7.59177	5.42194	6.11147	8.5397	6.40915	5.47733	7.07157	10.2801	7.6798
PF3D7_0504100.1	12.2092	10.4985	10.0863	9.24801	11.4576	14.2388	10.9526	9.74419	9.45145	9.65833	12.7267	10.1579	11.8888	10.7365	10.5983	8.90142	9.46248	10.1557	11.4927	8.71028	11.3474	11.5501	10.8476	11.7241	11.8268	10.9073	7.67063	11.7848	9.84679	13.1446	18.3238	10.7838
PF3D7_0504400.1	9.62506	8.32426	8.35063	7.46233	10.6174	10.3501	9.26176	8.40997	9.27807	9.70051	8.79662	13.6616	9.80684	9.44694	8.22886	8.9831	6.80315	7.24152	8.53187	8.35185	9.53767	8.3619	5.62417	11.813	9.50152	6.44331	6.37355	9.53184	8.21461	10.8513	8.06078	7.63848
PF3D7_0504500.1	21.3501	22.435	21.6875	19.792	21.3012	25.2848	22.2184	20.2824	20.3644	20.2086	19.1355	20.488	20.0141	21.912	19.8518	20.1635	24.6384	21.8294	21.7013	22.0275	21.3246	20.4789	22.6129	21.9203	21.3366	20.6807	15.9171	22.4557	21.3277	21.7937	20.7329	20.4222
PF3D7_0504600.1	4.81956	8.38343	2.37606	0.221813	5.16281	1.37931	4.70344	5.7847	3.90352	4.43897	7.43765	7.38715	4.04599	3.50723	3.87639	5.81092	2.58039	5.45864	5.9932	5.51106	6.66085	7.02097	4.36309	6.87442	3.32769	4.59298	4.96502	5.90045	7.97768	4.46586	7.45304	5.00985
PF3D7_0504700.1	9.44212	11.4395	12.0006	7.16728	8.49408	10.0113	9.46986	9.84455	9.33866	8.9575	9.36067	9.90768	8.17489	5.78863	9.40936	8.78613	11.6673	9.27265	9.13137	10.0446	9.08563	10.3924	9.91345	9.61215	9.22304	8.57032	9.80289	9.44222	9.64721	11.2037	7.76476	12.0537
PF3D7_0504800.1	8.07207	6.31366	11.018	8.53457	8.03024	8.83635	7.61354	6.4926	7.23122	7.2169	7.61323	9.42482	7.48789	5.61151	7.95299	9.17428	7.73255	6.84612	7.14416	5.0399	7.2097	7.86746	8.21176	7.43462	7.69481	7.6769	9.68264	7.00218	6.15555	9.66662	8.47532	8.79906
PF3D7_0504900.1	10.7283	9.95758	16.9177	13.4108	11.2853	7.20187	12.4015	14.5284	13.2361	11.6553	12.2661	8.6234	11.7258	9.86426	13.1979	10.9978	16.0286	12.3607	12.3454	12.4977	10.0771	11.5257	13.111	10.7069	11.9658	10.5981	13.9745	12.8859	9.92317	6.2065	8.41036	14.3437
PF3D7_0505000.1	7.00317	6.78483	7.26323	6.37964	6.3223	6.06387	6.49356	7.0349	5.74531	6.11225	6.67067	5.92164	6.38464	6.72198	6.95435	6.68591	7.42119	7.28149	7.63189	7.77994	6.30199	6.38804	7.00171	6.93585	6.54848	6.43362	6.58556	7.22258	6.19796	7.34079	8.10522	7.01097
PF3D7_0505100.1	7.38003	7.74643	7.40838	7.2895	6.90496	7.09114	6.83726	7.63098	6.49574	6.43752	7.24983	4.9384	6.09412	7.93536	7.45787	7.13311	7.76159	8.02537	8.44567	8.20214	6.53083	6.34535	8.16768	7.52539	6.6694	6.87227	7.18522	7.49593	5.96434	7.81582	9.12996	7.19707
PF3D7_0505200.1	9.50652	8.39048	8.80315	7.71803	12.8656	10.456	9.2806	13.0348	9.83405	11.0696	10.2747	9.97214	9.94576	11.2758	11.176	10.6578	13.6187	10.7243	10.3626	11.5867	8.94798	10.037	10.9252	11.3514	9.73024	6.82434	12.2348	10.6067	9.54675	9.31857	15.5054	7.9489
PF3D7_0505300.1	3.70719	4.49646	6.59477	6.18391	3.59177	5.81829	4.88409	1.18632	3.83559	4.08798	5.48606	4.50164	5.27597	0.1706	4.72439	3.72984	7.47178	3.31259	2.90505	3.45189	3.15877	2.59632	6.12527	5.42769	3.15991	3.02814	1.47197	4.30051	6.15541	5.09097	0.451641	8.88698
PF3D7_0505400.1	9.32341	8.12233	13.5898	9.83811	13.3834	15.1858	11.8199	10.7045	11.0432	12.4127	10.4337	11.2798	12.7269	8.63882	13.0942	10.4585	7.7573	9.94364	10.1173	12.119	9.75643	8.73621	11.5889	12.2984	10.2502	12.8835	12.8733	9.36454	12.8657	12.3276	8.76673	13.7821
PF3D7_0505500.1	6.83565	4.06997	4.48369	6.38709	6.80725	5.69165	7.48758	8.03497	6.20564	6.66773	6.28461	3.92801	7.00443	9.92126	5.59998	6.75182	0.920738	6.11817	6.49595	4.18879	7.08976	5.55361	5.6106	6.29972	5.68274	5.96203	7.11882	6.83212	5.05307	2.14075	7.77849	2.91851
PF3D7_0505600.1	9.63772	5.81483	14.6572	10.8848	7.72899	9.81041	9.22673	9.99991	9.03573	9.12135	10.0315	5.101	8.59481	6.39693	9.66819	9.27293	12.1005	10.0905	10.6623	10.4404	9.18467	9.1677	10.3145	10.0391	8.63816	8.03416	9.2332	10.3407	11.7558	11.5343	12.6077	12.6374
PF3D7_0505700.1	6.98622	7.17529	6.74222	8.33801	8.16163	7.09551	9.21109	7.33388	8.22479	8.627	6.54204	6.7553	7.54674	8.45942	7.34249	7.3626	7.13058	7.0603	7.86661	7.56184	7.79293	7.62993	7.32403	7.32203	8.25909	6.86139	6.32155	7.06156	7.71849	6.99123	7.75321	6.87833
PF3D7_0505800.1	7.04014	6.92576	6.15926	6.54656	5.49804	6.20959	6.26295	5.71963	6.16205	5.82927	7.15772	6.23268	4.52722	6.23159	5.56565	6.33763	6.7273	6.64859	6.3912	6.33753	6.74562	6.37064	6.842	6.34501	5.25906	5.22588	5.84378	6.57947	6.7616	6.38367	5.81126	6.40394
PF3D7_0505900.1	4.91336	6.81451	8.03462	5.44346	3.47726	4.0022	3.58066	5.08268	3.83947	4.57147	5.58732	4.00458	2.9852	0.680119	2.29823	5.76753	6.23249	4.94739	4.49132	4.41177	6.70771	5.91881	4.01142	4.51012	5.18625	3.35088	2.20125	6.01918	7.87181	6.71671	4.16745	7.22042
PF3D7_0506000.1	9.61012	11.4769	10.1599	7.47078	7.89242	7.80585	7.91675	7.90715	8.93853	8.23558	9.91663	7.4187	7.49007	12.5085	2.90353	9.16622	8.88335	9.00707	8.86785	9.51572	14.0169	10.8803	7.69805	7.02606	6.45888	6.78586	7.11638	10.4235	10.981	8.67741	1.91045	4.49085
PF3D7_0506100.1	7.04249	6.94576	7.84934	6.99166	6.40172	6.41255	6.6109	7.13238	7.74494	7.38191	8.133	7.60058	6.86636	6.36234	6.64962	7.20274	7.35147	6.90304	6.63349	6.83924	7.59107	8.03116	7.36403	6.86601	7.20049	6.18787	5.91746	7.90852	6.73742	6.82057	7.53195	7.55941
PF3D7_0506200.1	6.85975	8.92547	11.4753	6.4193	5.20422	7.19662	5.30147	7.9413	6.66538	6.20845	7.91339	8.62985	6.5575	3.3865	7.34543	6.68155	9.55198	6.56116	6.53715	6.57317	5.44877	6.36285	8.02608	6.89267	7.19867	5.82275	5.86727	7.54087	3.47116	6.8317	0.968688	10.4056
PF3D7_0506300.1	6.8215	5.95005	6.46215	8.65615	5.9503	7.59988	7.42634	4.41267	8.08829	7.65611	7.3304	5.26788	6.26046	8.21501	6.78669	6.57335	4.4284	6.71772	5.71211	7.11259	7.79479	7.18054	8.84762	2.61432	6.55261	6.77576	9.48223	6.96838	6.54354	6.98275	5.52073	6.79887
PF3D7_0506500.1	8.61787	9.9555	7.96183	8.96605	8.71581	8.4495	7.83631	10.2265	8.08979	9.06137	8.39863	8.26418	8.23827	11.5185	10.0501	8.3919	10.3646	9.91857	9.80056	10.675	7.36158	8.36388	9.13681	9.18065	9.06864	9.45529	10.0298	8.82483	5.07859	9.90341	9.413	7.55918
PF3D7_0506600.1	10.9452	10.4469	10.9582	8.52705	11.2605	8.09749	11.0834	9.61017	9.36836	8.19335	14.2642	10.3857	8.66692	12.3645	7.51255	6.62072	6.70378	12.471	11.4192	11.8471	13.2201	10.5295	6.09181	10.399	10.8286	11.9502	6.77711	10.6069	11.4944	7.03544	9.12656	8.13393
PF3D7_0506700.1	8.45185	10.9771	9.00054	9.45646	8.83594	10.1328	7.8375	4.30476	6.69314	7.83172	8.82246	7.29867	7.23336	10.4079	7.97151	8.86336	10.1701	9.45861	10.5022	10.1069	8.26789	6.84895	10.1485	9.86794	7.38712	9.44858	7.65796	9.29638	7.73517	10.0317	10.9679	7.84894
PF3D7_0506800.1	8.4426	8.89596	9.15371	8.6607	8.1565	7.92224	8.30446	8.03851	8.52664	8.32979	9.12426	8.04597	8.55827	9.59875	9.06253	8.53013	9.60336	9.40863	9.45972	9.42519	8.10923	8.31062	9.13735	8.77557	8.53316	8.78485	8.85441	9.15665	6.98934	8.93993	9.66165	8.51519
PF3D7_0506900.1	12.0642	17.1689	10.2126	14.4537	13.4579	15.2956	15.3202	13.8075	13.783	13.5093	12.5846	7.97999	13.5757	17.3487	12.3839	12.8666	15.0396	15.1574	15.858	14.3212	14.8691	13.3477	14.5449	13.8675	13.792	13.2459	13.2331	16.2345	16.1617	12.0453	14.3927	11.4957
PF3D7_0507000.1	2.60649	6.50289	-1.28052	0.76061	1.27245	1.96001	1.21445	1.97266	1.32784	0.165205	2.51759	-3.65001	0.804679	1.06991	-0.0520205	1.41273	5.97456	2.02772	0.873953	3.22904	3.80796	4.11244	4.11194	-2.81327	2.34351	0.0245811	3.78445	3.3965	5.20476	3.10478	6.30039	1.52577
PF3D7_0507100.1	10.9782	11.5283	11.6937	11.6451	11.2346	11.3532	12.1012	11.3618	11.1673	10.9926	11.1178	11.0091	10.9326	11.934	10.8674	11.62	10.7787	11.4374	11.9765	11.3614	11.5448	11.3395	11.8631	11.514	11.1126	10.5666	10.7867	11.6895	10.8611	10.4937	10.8682	10.8745
PF3D7_0507200.1	9.49982	3.80303	12.3956	9.67349	7.71019	8.41259	7.35412	8.75986	8.3509	8.44031	9.41806	8.98901	8.35299	5.80252	9.02656	9.68514	8.75468	8.19278	8.50163	8.30027	8.50933	8.09644	8.00127	8.57772	8.23464	8.72935	10.0941	9.5465	10.9935	8.11095	10.2281	10.4278
PF3D7_0507300.1	1.99851	-1.70093	4.72776	-3.08884	-0.577881	1.27621	0.882691	0.492288	0.972598	-0.228039	0.368891	1.62723	0.977705	-2.5855	1.27268	0.238386	2.36618	-0.282251	-0.802442	0.0722434	-0.178166	-0.0915192	1.10943	-2.75448	0.916112	-0.360797	2.59104	0.717309	-0.72766	1.85687	-2.72374	2.89775
PF3D7_0507400.1	1.93143	-1.54918	4.40592	-2.64748	1.00283	-2.00339	0.824734	-2.39476	0.365286	0.342989	3.19791	4.1828	2.52527	-0.0542367	-0.817502	-1.90703	-0.925058	1.8015	-1.84901	2.56955	2.7824	1.92846	-1.52223	-1.42307	0.767223	-0.449851	-2.24671	1.02739	-0.668138	1.86472	-1.31099	1.02836
PF3D7_0507500.1	1.86044	4.01524	1.98152	3.56582	3.03045	2.82191	3.30727	1.27248	1.84044	2.89088	3.4326	1.05491	2.42419	2.17039	-0.050332	2.92287	-3.30867	1.38052	2.15293	0.92732	5.05257	2.58714	0.156581	2.962	2.47237	2.83273	1.60459	2.04409	5.35426	2.76079	2.01563	1.92108
PF3D7_0507600.1	4.01653	4.64612	-1.94775	4.85968	4.70696	4.56253	4.47858	5.55276	4.29939	4.81615	3.9098	6.14344	4.92305	4.24897	8.02511	3.84301	5.96938	4.59267	4.82056	4.65548	1.38811	2.96359	5.12307	5.62472	4.89237	5.42336	5.16415	3.5765	5.54505	4.29165	6.24774	5.7259
PF3D7_0507700.1	5.99286	6.4512	6.42953	7.82471	6.75794	7.50732	5.37112	7.81757	5.77944	6.07392	6.70687	6.75285	5.59616	2.93862	7.88431	5.57434	7.92293	7.02905	6.74509	6.77549	5.31626	6.79323	6.94096	6.68534	7.28284	5.84244	7.26512	6.58346	8.40788	6.90677	8.38474	9.35382
PF3D7_0507800.1	8.5225	8.54994	8.33889	7.82677	8.87098	8.62656	9.09357	8.28997	8.48797	9.06066	8.08598	9.38107	8.98748	8.66796	8.72147	8.32521	8.75938	8.39706	9.23761	9.23774	8.66136	9.05139	8.48142	8.61022	8.85265	8.54703	8.85105	8.19336	9.22123	7.99449	8.63608	8.26603
PF3D7_0507900.1	7.67192	8.2093	9.37379	11.5215	10.8376	13.256	9.81611	12.8836	11.1035	10.0549	11.8537	14.9902	10.3626	11.7088	11.4597	9.36937	5.42776	11.7814	11.1818	11.6089	10.1327	11.0772	11.9066	10.1759	11.339	9.71941	9.95127	11.7742	9.21899	3.44748	6.99102	9.47673
PF3D7_0508000.1	13.6695	14.6569	15.0613	16.1202	15.3234	15.7815	15.0756	17.3536	17.123	15.5839	15.4002	14.3313	14.9503	15.8373	13.9877	15.6745	17.9437	13.0862	14.2789	15.1838	15.2942	15.8795	15.8834	14.7502	15.8629	14.5913	13.4774	14.4123	15.3698	9.86474	12.4285	13.1418
PF3D7_0508100.1	11.3745	10.0378	15.2208	10.1134	10.8117	12.6124	12.3533	8.30656	11.409	11.9626	10.3421	11.3418	11.4694	10.0342	9.07767	12.5993	8.87949	10.1094	10.2117	10.3639	13.2935	11.8665	10.7711	10.6774	10.1885	12.1676	12.3133	10.671	13.4878	11.1357	9.32675	10.811
PF3D7_0508200.1	15.086	19.2203	13.8062	16.3196	15.2765	14.9613	14.4109	12.5956	15.3365	13.0199	15.688	13.2954	13.2575	15.3449	11.5824	13.9486	10.773	12.9663	13.5939	14.337	16.9127	15.7197	13.6835	14.2799	13.9871	12.9778	14.8126	14.5321	13.8171	13.9988	12.8197	13.0445
PF3D7_0508300.1	5.04909	6.84248	5.67866	4.8054	5.55498	6.13293	4.85773	6.2792	4.54882	4.45277	5.26587	4.94974	5.08543	3.30885	7.66427	5.11534	5.92236	5.90022	5.32514	5.34028	2.77726	4.37438	6.62532	6.94754	5.57359	4.87299	6.02768	5.84678	1.98528	8.15347	8.99192	7.95497
PF3D7_0508400.1	9.25199	13.8862	7.60183	4.07076	10.1911	10.4783	9.50294	10.3809	7.35969	7.94132	7.95589	13.3176	8.42758	9.54395	8.06794	9.65757	13.0289	8.93271	9.47206	11.415	8.94435	9.40998	11.1588	9.77205	9.64733	8.64671	3.56643	9.60275	7.56348	8.29605	6.51106	7.80002
PF3D7_0508500.1	4.12665	3.05632	6.6938	4.0537	4.41991	3.66301	5.11506	2.91397	4.19292	3.82695	3.95335	4.77746	3.28731	3.18636	5.75269	3.09677	7.33989	5.50426	4.95106	5.77511	3.35841	5.13565	4.96811	4.6645	4.08294	4.88976	5.77127	5.27949	3.90322	6.42718	6.87872	5.99186
PF3D7_0508600.1	6.1619	6.49529	7.67624	7.42434	7.09768	6.91748	8.16925	6.26928	6.38227	7.22045	6.55867	6.84112	6.91764	6.53317	7.26748	6.4687	7.74292	7.45628	7.3677	6.37303	6.42232	5.73286	7.10852	6.71601	7.19614	6.22779	6.07514	7.68843	7.01565	6.82326	4.93128	8.0091
PF3D7_0508700.1	7.08354	7.6743	5.67929	7.34726	7.51103	7.45139	8.41655	7.29548	8.02402	8.22227	6.81806	7.30533	7.7721	8.62377	7.60559	6.90414	7.60552	7.24153	7.86914	8.04528	7.53818	7.76096	7.07254	7.29501	8.06393	7.72863	7.04918	6.84203	8.00704	7.16652	7.4103	6.61061
PF3D7_0508800.1	5.5868	8.32753	6.98369	6.51617	7.21446	6.75442	8.78492	6.95335	6.8839	6.63634	6.07292	5.52337	6.97068	7.9379	5.00083	7.49592	3.24005	7.55319	7.93457	7.55232	8.34324	6.5625	5.48069	8.75	7.12532	7.09062	3.02005	5.65863	7.814	7.29092	6.4299	5.75308
PF3D7_0508900.1	13.3115	11.6334	16.4705	13.4765	14.5929	13.0092	14.5767	13.0907	15.0824	13.1024	13.6132	11.2023	13.8539	14.2871	13.1363	14.2046	14.6396	12.7878	15.6411	14.0092	14.7576	14.3625	14.2923	13.5411	12.8532	13.7899	14.7206	13.8707	15.0206	15.4887	15.3732	13.4909
PF3D7_0509000.1	6.49755	9.3836	10.8852	8.41915	6.70576	6.06594	7.17766	7.52864	5.32451	7.37507	7.92959	1.80287	3.71285	8.45694	5.99658	8.10967	6.46196	7.74744	7.97209	6.95747	5.64817	4.1928	7.46442	8.31644	7.00382	7.29249	8.05274	7.10581	1.65537	0.720009	8.23708	5.31095
PF3D7_0509100.1	11.563	9.70557	9.71028	10.8232	9.58672	10.0359	10.3213	11.738	10.4889	10.1291	11.4716	12.2282	10.9213	10.9506	10.7987	11.9774	13.5391	10.4854	12.0789	12.1219	11.3455	11.1413	10.4644	10.6723	10.2615	10.8945	11.3545	10.5825	14.5165	12.4362	9.20891	10.8805
PF3D7_0509200.1	7.78788	4.25828	10.5672	3.24219	7.68568	8.96187	7.90044	9.41364	9.51424	8.8396	6.77571	10.3196	10.7297	7.2298	9.64595	7.7732	4.80258	8.28109	7.80611	7.86128	6.39455	5.90415	8.62282	8.64089	8.07621	8.61038	3.63967	6.88061	4.64263	7.55835	5.17507	9.34694
PF3D7_0509300.1	5.42682	9.40485	2.2113	4.33253	5.08343	4.23605	6.02131	6.77781	6.42492	5.74563	6.11604	7.07919	5.30721	2.41268	6.17411	4.52517	7.39195	5.25331	5.33907	6.74577	5.89215	6.12443	5.79313	3.16105	6.85338	5.06455	4.56346	4.93893	9.53589	7.06479	0.37672	9.11931
PF3D7_0509400.1	6.78225	6.07295	5.74282	6.15642	6.60536	6.76705	6.68144	6.84772	6.92836	7.30641	6.49681	7.36267	7.56025	7.47633	7.34654	6.62536	6.51713	6.88056	6.95247	7.05066	6.44141	6.72718	6.80505	6.95285	6.65162	7.31177	6.77506	6.2353	6.83324	6.40611	6.821	6.32981
PF3D7_0509500.1	7.95443	3.12754	10.4772	9.87523	7.79706	9.71709	8.18048	9.37805	7.68645	8.46076	7.9415	8.28488	7.8164	10.0954	6.0427	7.98891	8.99527	6.29902	7.58184	7.07653	8.54457	7.33659	5.30862	9.29118	7.63664	8.97434	7.66573	6.80202	9.39527	1.53638	2.94864	4.06775
PF3D7_0509600.1	9.32801	10.488	4.11482	11.4065	10.0921	11.245	10.2253	10.9754	9.83062	10.6906	9.63835	11.2543	10.7849	12.739	10.1688	9.59727	2.77795	9.46168	9.38849	10.0566	10.7406	9.0412	9.74623	9.37462	8.57235	10.7948	10.5141	8.83028	11.8884	9.75472	3.46777	8.96103
PF3D7_0509700.1	19.2765	18.9909	18.673	22.473	21.326	16.9149	20.1836	22.7707	18.3838	19.2301	21.9171	16.7274	19.1027	20.3589	16.6443	21.2108	15.9609	18.0099	20.0143	20.3413	23.0471	19.3684	19.8994	19.4123	18.6882	19.144	12.7573	20.2933	24.4269	20.1241	17.8538	19.9353
PF3D7_0509800.1	8.4638	8.39875	9.13132	8.28996	8.32079	8.78168	8.74595	8.2966	6.71019	8.06971	8.36425	8.16866	8.81005	8.89621	7.7249	8.70354	9.21851	8.96033	9.45123	9.34179	9.03689	8.75897	8.56065	8.45567	8.27828	8.43115	8.38269	8.2719	9.70246	8.39823	8.64987	7.74799
PF3D7_0509900.1	0.907544	-1.16565	-0.118551	0.0484677	0.18617	0.324082	0.528163	-2.32874	1.31808	0.426631	-0.593388	4.9567	1.22138	1.62422	-0.121635	-0.518861	4.06886	0.0270372	0.43094	1.36001	1.16273	1.05056	-1.11591	-1.91433	2.68043	-0.237646	-2.83066	1.8354	0.556886	1.94652	-1.5805	-0.756034
PF3D7_0510000.1	9.24872	7.10093	7.37782	8.60305	8.25532	9.71465	10.6701	9.59574	10.2973	9.84079	9.2995	10.3518	9.70196	9.58458	9.33828	7.08818	5.15685	6.92837	7.43417	7.2808	9.44901	10.2957	6.79484	8.67811	9.09636	8.37182	10.6974	9.1415	8.25201	9.54918	6.6073	8.50146
PF3D7_0510100.1	6.94171	6.45592	5.84201	7.60847	6.38213	6.24912	5.88355	7.89735	4.9749	5.65227	6.83563	7.13416	5.11648	5.10608	6.80524	6.41601	9.03531	6.39963	7.22932	7.12498	5.93894	7.63933	6.40386	7.66732	6.0365	5.71739	8.18526	6.18422	8.40568	5.93563	8.40515	6.7296
PF3D7_0510200.1	6.76444	1.32771	6.82405	8.33127	7.18362	7.42918	7.68274	8.4749	7.83778	8.43706	7.33698	8.16983	7.65642	7.35207	8.88893	7.09022	8.00577	7.13638	6.86931	6.19736	6.15947	6.56862	7.0801	6.97306	7.33465	7.33158	7.41147	7.16582	8.57957	6.03242	7.73369	7.38643
PF3D7_0510300.1	5.81833	10.0659	10.3506	13.3864	11.3627	12.6154	11.6421	8.37367	11.7721	12.5685	11.5762	9.07446	12.7896	11.2813	10.7776	12.1754	14.1346	8.4454	9.14952	6.53097	8.98484	8.97843	10.6414	11.4098	11.6269	11.4848	12.9174	9.56584	10.2695	6.48277	9.04635	8.93797
PF3D7_0510400.1	3.39631	6.54907	5.3905	4.18478	3.40032	4.15754	2.89105	4.85586	3.15495	3.604	3.10303	2.45113	2.46763	0.785148	3.2751	2.21642	5.33689	4.52855	3.93855	4.691	4.17079	4.65312	4.28064	1.97588	3.93871	3.2218	4.79818	3.55121	5.70143	4.50587	-0.729819	6.35982
PF3D7_0510500.1	10.151	9.52738	12.3635	8.73757	9.49117	10.1814	7.29754	11.7668	8.44999	8.7525	10.4499	8.04778	7.40353	6.69424	9.62045	9.63297	11.3343	10.4694	10.404	11.106	9.71834	10.5412	10.405	9.84562	8.90833	10.2819	11.3456	10.1034	11.7145	10.6685	12.6854	11.3945
PF3D7_0510800.1	9.87812	7.59301	8.1955	10.411	7.71948	8.33349	9.0928	6.2176	9.87357	8.68341	10.2072	6.97945	8.22522	8.16202	10.2458	9.34164	9.83049	6.99862	8.91687	7.71648	7.39965	7.40284	9.14994	9.34009	8.87107	9.32682	9.49425	9.21932	8.09977	10.389	14.3077	10.28
PF3D7_0510900.1	-1.17028	-6.73248	-4.62967	-3.03833	-11.3207	-11.0354	-7.02498	0.966886	-2.15781	-3.0681	-0.588356	-8.5148	-4.70451	-2.31226	-4.17305	-2.59951	1.69963	-3.02371	-3.24702	-2.4565	-4.66204	-3.20693	-5.64888	-7.12362	-4.86276	-4.71397	0.840097	-10.0056	-3.42128	-8.61721	-7.74051	-6.19716
PF3D7_0511000.1	13.1682	14.9446	13.9054	12.9394	12.5204	13.5386	12.5762	11.8524	11.3204	12.3474	13.3964	11.5878	12.5027	14.1222	12.4823	13.5123	13.1801	14.2513	14.3741	13.6711	13.0154	11.7098	13.647	13.537	12.3217	12.7635	13.1378	13.8884	11.9092	14.1638	13.3008	12.7859
PF3D7_0511100.1	12.7087	17.5268	19.3887	8.64447	9.85764	13.9541	11.6151	9.39821	11.4991	9.55111	14.2203	10.029	12.9257	9.03087	11.2954	12.755	14.274	14.2442	14.4021	13.7728	12.2422	11.4534	14.4585	14.4901	13.0319	12.1869	7.02553	14.3094	8.55085	15.7298	16.1997	16.1615
PF3D7_0511200.1	8.39988	10.2633	5.31357	8.35048	6.54203	8.69982	6.74268	7.29874	7.80981	6.83641	7.72254	8.26648	6.40904	4.05179	9.04637	7.90683	3.67367	7.66806	8.33211	7.89292	7.28931	7.78219	8.35366	7.95263	7.71791	7.73471	10.2776	8.7098	10.439	7.94233	10.3237	11.0575
PF3D7_0511300.1	10.9668	9.35947	10.0642	11.8314	10.0556	8.72848	8.97395	7.69607	9.19867	8.76214	11.8361	8.44546	9.11773	10.3913	9.77083	9.38	10.3783	10.825	10.6183	10.8158	10.514	10.1526	10.5554	9.83264	9.01358	9.88687	9.31326	10.5982	10.33	12.7043	14.6688	10.5543
PF3D7_0511400.1	6.52365	4.24715	4.9046	9.45559	7.04995	1.98675	5.24902	8.40559	7.65165	6.01166	1.04398	4.27449	7.16742	6.5681	4.90146	4.59524	2.58326	5.89162	5.92744	1.3536	5.96684	6.17994	2.53981	7.40522	6.34765	7.16149	1.95922	4.68467	5.11638	1.66653	3.82399	4.23619
PF3D7_0511500.1	9.38127	9.00159	9.08856	8.6568	9.40013	9.15797	10.4478	9.3618	9.52767	9.39393	9.02191	9.78755	10.5407	9.89805	9.70588	9.15187	9.98399	9.58798	9.90463	10.2305	9.45192	9.57218	9.12831	9.00535	10.0823	9.0883	9.36411	9.15678	9.79072	9.41374	9.26584	9.15456
PF3D7_0511600.1	8.10392	6.71967	7.6169	2.31494	7.97018	8.85222	9.67868	8.05374	9.78216	8.33138	6.25273	10.6606	8.86111	9.00018	9.29608	7.5971	10.1042	7.46085	8.68823	9.72333	7.15913	8.22052	8.47074	6.83307	8.04497	8.54209	10.379	6.90591	7.71884	7.19461	5.42731	6.67138
PF3D7_0511700.1	7.99589	9.47605	8.48495	7.00585	7.02553	5.76708	7.03287	6.71211	5.30052	6.24609	7.30182	8.00593	6.29059	2.89906	6.32954	7.23319	8.62193	8.20082	7.75624	7.81663	8.05907	8.47807	7.60287	7.57815	7.15386	6.00965	5.0266	7.59291	10.6217	8.3426	8.63074	10.2525
PF3D7_0511800.1	11.8696	13.1293	11.965	11.8067	10.2605	11.7883	11.345	11.0848	10.33	11.1725	12.0583	10.71	11.3037	12.1131	10.5272	12.374	12.1772	12.0905	12.5079	11.8382	12.3281	12.3076	12.1999	12.2248	11.0946	11.221	10.9177	12.2307	11.721	12.3388	13.0409	11.1037
PF3D7_0511900.1	8.76259	6.30034	5.60333	7.4281	5.00134	6.24581	5.60545	6.65585	4.80098	6.96307	8.67025	6.87178	7.64688	9.08664	6.49329	7.73218	7.29176	7.53896	6.76182	5.06636	7.22316	7.06481	7.31556	7.06391	5.06655	5.68427	7.24867	7.25046	5.35119	9.65249	8.05362	5.72763
PF3D7_0512000.1	13.5303	12.7598	11.1535	13.9624	12.3769	14.1266	12.3186	6.64949	11.3369	13.4219	13.4415	14.6795	13.0111	14.4764	13.5375	12.9287	13.3995	12.837	13.6129	13.0517	11.9638	10.5145	13.4096	13.4779	11.4923	13.2292	13.8031	13.629	12.9819	13.7821	13.9053	12.4925
PF3D7_0512100.1	14.2159	11.3026	19.5901	13.1422	12.1613	13.7088	11.4414	9.59795	8.64034	11.8231	14.5493	10.7316	13.9747	14.8681	9.08032	13.3021	17.8167	14.2872	14.4581	14.7272	16.0228	14.5419	14.3988	11.002	13.2529	13.3461	6.84064	14.738	12.3887	16.383	17.5711	11.0562
PF3D7_0512200.1	9.61005	7.5044	7.92209	11.7441	11.2772	9.96684	10.9285	10.8029	10.6326	11.1825	10.3479	7.64812	10.7121	13.6695	8.89407	10.4504	9.0505	9.81177	9.73607	9.37902	11.9189	9.02047	10.4943	7.87132	8.83873	10.0495	8.70163	9.28563	12.7849	11.7226	5.92031	8.36089
PF3D7_0512300.1	4.2151	5.71652	7.71004	4.02864	2.43668	2.32036	2.5355	3.37799	3.17204	2.83952	3.94534	1.78948	2.38311	-1.10704	0.324686	4.21241	4.79777	4.02672	3.35918	3.10096	5.6277	4.63914	3.42262	4.31306	4.3689	2.3696	-4.27078	4.10516	6.01375	3.5492	5.18787	6.19825
PF3D7_0512400.1	9.89123	7.99492	9.33115	10.6206	7.88626	10.2895	9.08993	13.3183	9.66164	9.65463	10.2515	7.03221	8.53888	11.8424	6.42452	10.1033	10.7964	8.12691	9.73064	7.097	11.3512	9.58533	9.70701	7.89288	10.6493	9.08109	3.33295	11.3164	9.94146	3.90632	6.50903	6.569
PF3D7_0512500.1	8.40906	11.9364	4.64741	6.08537	3.47206	2.84485	4.47521	3.46728	5.96067	5.53614	7.78046	7.99664	5.55398	4.95398	6.19286	7.21531	7.41616	7.36889	7.83614	6.2871	6.37567	7.03668	8.1862	6.67514	6.43558	6.57986	2.05613	7.81258	4.7709	7.41094	9.29909	8.77908
PF3D7_0512600.1	7.90088	12.8432	3.10802	8.30112	7.15162	7.86148	7.87981	8.30106	8.45933	7.21278	8.51579	4.00027	6.58401	10.7695	5.68088	7.88614	9.04446	8.50344	8.10613	8.28343	10.0495	9.35871	8.93406	7.64076	6.55795	6.77148	7.18432	8.90929	10.0492	9.44757	8.43788	5.84924
PF3D7_0512700.1	8.95788	10.5459	8.20367	7.32719	7.78212	6.03647	6.27331	8.47369	5.877	6.97918	8.82824	9.25897	6.5914	4.2647	8.54313	8.49975	9.35689	8.59622	8.45026	8.59805	7.39688	8.43918	9.67211	8.23248	6.58752	6.20332	9.08891	8.95689	9.02595	9.29021	8.85969	11.1642
PF3D7_0512800.1	8.77556	10.8477	11.3684	8.05644	8.09793	9.12464	7.04234	6.21896	7.27977	8.04787	8.82255	6.88775	5.14432	6.71484	8.25816	9.06014	10.6932	9.52487	9.85951	10.1994	7.38173	6.97818	9.83991	9.67656	7.79464	7.91321	7.30749	7.94759	6.686	11.5387	12.0142	10.0825
PF3D7_0512900.1	7.08927	3.1737	3.1683	2.73895	6.499	8.45354	3.93647	2.8868	2.74897	5.81659	5.65567	10.3897	2.45507	11.8424	5.85724	7.56583	2.44542	8.34712	8.51629	8.40605	6.77853	5.58166	9.13134	1.83533	4.29143	5.86394	7.77428	7.21339	3.2	10.2507	10.7339	1.22336
PF3D7_0513000.1	14.3066	12.9167	13.0737	10.1607	13.9516	17.0648	13.0177	16.2009	13.3146	12.9681	15.6764	12.3687	12.2687	14.6747	13.9826	15.0842	17.4739	15.3243	16.3422	16.4639	14.4075	13.2463	14.7564	14.6298	13.7691	14.2535	14.9934	15.326	18.2173	14.827	19.4969	12.7835
PF3D7_0513100.1	5.76667	8.64228	9.36336	1.78189	6.13749	7.25749	7.54057	6.12623	5.20386	6.76356	6.97553	8.03411	7.13556	6.98439	6.14778	5.82486	7.75389	5.974	6.01809	6.55145	5.5694	5.48203	6.08375	7.23342	6.0711	6.5061	5.6888	5.46059	1.60646	8.39429	0.898124	6.15086
PF3D7_0513200.1	7.23915	7.20962	5.71402	6.5054	6.35653	6.06279	7.13645	5.98085	6.49694	6.5748	7.12145	6.8549	7.17598	7.04005	7.25312	6.7426	7.46978	7.58507	7.34493	7.34851	6.62844	6.51921	7.18493	7.0052	6.52282	6.5648	6.50568	7.02296	7.40083	7.35461	7.83576	7.2486
PF3D7_0513300.1	4.56095	5.83667	4.12357	7.5639	7.18825	8.06405	7.87034	6.16734	5.85624	5.93258	3.86521	4.5615	5.9409	5.50029	7.88275	5.5239	6.72967	5.80603	5.32671	3.58858	3.47953	4.35176	7.68622	6.50174	5.99424	6.09737	6.17439	4.71699	4.61507	6.73927	6.1277	7.06795
PF3D7_0513400.1	4.87559	2.33053	2.62567	6.0271	3.83028	5.58521	4.54352	7.00516	4.44303	4.17161	0.166388	2.93709	4.6855	4.22051	2.72253	4.46089	2.00602	5.43251	4.04662	4.37012	6.28699	4.26958	1.68259	1.47997	6.64991	3.19428	1.41149	4.24813	8.67743	6.9535	2.52795	3.67342
PF3D7_0513500.1	10.8695	14.4907	7.77585	10.3797	9.79682	4.50907	9.12781	10.1519	10.2167	10.0059	11.103	10.2321	9.31845	10.1541	6.0068	10.871	11.7954	10.647	10.2316	10.9704	13.6441	11.9205	10.6063	8.98189	9.60351	9.71265	2.94274	11.0933	14.8931	3.8624	6.37222	9.03062
PF3D7_0513600.1	12.0822	12.4155	13.0616	11.3031	12.2798	12.9299	12.1555	10.8531	11.3218	12.9143	12.2908	11.2607	11.5598	13.4644	12.4732	12.1264	12.6762	13.2543	14.2907	13.9979	11.8202	11.0252	12.5812	13.3105	11.9309	12.2353	11.7467	12.275	11.5705	13.4518	14.4235	11.8838
PF3D7_0513700.1	13.6685	13.5826	12.9138	12.5218	10.9121	13.066	13.5082	13.1423	12.6658	12.9258	15.8427	13.5598	14.8162	13.6434	13.2698	14.4002	17.1617	14.0508	15.421	13.9584	14.3631	14.1044	13.1929	13.5825	12.9144	11.5923	15.6927	15.0721	16.9903	15.6737	13.3682	13.8962
PF3D7_0514000.1	8.89967	7.82824	7.77883	6.72532	5.4207	6.81263	8.30024	7.29364	8.69786	8.36838	10.0545	7.80167	10.1514	8.50444	7.42255	9.5871	12.3215	8.3678	8.53449	5.80281	7.23201	5.43956	4.63906	11.0071	8.45299	5.90287	5.41894	5.69	7.90549	9.73638	7.30785	7.28817
PF3D7_0514100.1	7.48206	5.93085	10.1348	5.67039	6.93512	5.07613	8.33898	9.1604	7.6326	8.48839	7.16622	6.62071	8.80361	6.73034	9.68473	7.63899	10.6487	7.74183	8.49734	8.02793	6.36272	6.74058	8.10098	6.27346	7.55565	8.69515	9.55466	8.05826	7.05172	10.8604	4.93179	10.3101
PF3D7_0514200.1	4.71455	7.81237	9.70149	4.08303	3.46254	2.73084	4.14662	4.77329	3.29809	3.09915	6.15454	0.265638	3.30199	2.71581	1.90855	4.77443	7.69902	6.10341	5.60376	5.7639	5.80545	4.86725	5.87821	5.0417	4.58494	2.46621	-1.24411	5.64957	3.15153	5.96753	6.24896	6.32767
PF3D7_0514300.1	10.3936	13.8769	9.39353	9.35947	11.1026	12.4229	9.92712	10.8793	9.48813	10.209	10.8816	11.1447	10.6915	11.3639	9.80983	11.0573	7.02527	9.07936	10.3128	10.696	11.1171	10.9967	11.1525	10.806	9.48244	10.2184	12.9298	10.2889	9.13085	11.0301	8.55423	9.43553
PF3D7_0514500.1	16.5515	16.4705	16.6123	17.3257	15.5355	18.2351	16.0576	19.1746	15.5235	16.6528	17.588	13.5202	18.166	17.7186	15.1244	16.4623	12.6024	14.5963	15.2819	17.3315	18.1266	17.146	16.2486	15.9157	16.1148	15.8563	16.9012	17.5537	16.6914	16.2998	14.6458	15.6185
PF3D7_0514600.1	3.74494	5.95069	7.12223	5.76345	7.04377	3.30171	4.48534	3.91756	4.08206	4.67707	5.19041	3.79117	5.25382	6.65299	3.07635	4.76085	6.18079	5.42296	4.57693	0.280092	5.19384	5.93523	5.47511	4.79159	4.29711	5.17369	4.52074	3.72471	0.285488	2.71228	4.78946	2.15229
PF3D7_0514700.1	5.91821	3.84441	4.07189	6.94107	5.40189	2.61569	4.3638	6.44248	4.91589	5.01099	3.90535	3.07233	4.93621	4.95781	4.34149	5.63961	2.92626	4.04802	3.04677	2.28734	4.73849	2.75984	1.62851	4.78392	5.12026	4.82214	4.97184	4.27703	4.46285	5.79745	3.37807	4.40873
PF3D7_0514800.1	8.76344	10.9525	12.5763	8.34638	7.6646	9.17496	7.36515	9.176	7.24078	7.39869	8.07602	8.00453	8.3164	6.59161	7.20406	8.22551	7.12699	8.85597	8.87862	9.01395	9.18769	8.97838	8.93989	8.02158	7.92	7.3936	8.14586	8.12534	6.9059	10.6508	3.8474	10.2448
PF3D7_0514900.1	5.23543	5.47658	8.68256	6.1709	4.49697	4.5971	5.11746	6.55582	5.34757	5.26498	5.55684	7.00929	5.20899	1.57414	8.33242	5.04868	7.3288	5.25618	5.23866	5.69473	2.21821	5.49888	6.69858	6.4237	6.62574	4.94962	5.99974	4.96872	0.911431	5.76702	6.64749	9.4126
PF3D7_0515000.1	6.49038	7.31544	7.65211	7.78361	7.16125	7.92227	7.76969	8.48793	7.41499	8.14975	6.66935	7.72252	7.45698	6.67503	9.18664	7.15732	8.54586	7.05307	8.03197	8.36834	5.46044	6.62304	7.93518	8.49248	7.94722	8.02572	8.11847	6.88906	6.56853	5.91562	6.38845	8.53853
PF3D7_0515100.1	9.62584	8.59135	9.23298	8.77606	9.03044	9.31951	9.32227	6.87542	9.92856	9.76837	10.8637	13.6361	9.57934	11.0428	9.71189	8.94222	12.5686	9.70498	9.6336	10.1659	9.61903	10.1966	8.88322	9.41132	9.21967	8.92836	10.5489	10.463	9.08944	10.1404	7.85441	8.37467
PF3D7_0515200.1	8.35993	5.0298	5.33518	4.00711	8.85326	3.58877	6.53535	4.99399	8.27474	8.83317	2.22128	5.80794	3.87563	6.74701	5.23966	2.01303	3.8321	5.97507	4.98892	2.76248	7.3567	6.23983	3.51801	3.0893	7.29116	8.2942	3.53713	8.3757	5.41529	2.77484	4.90168	4.98041
PF3D7_0515300.1	7.7665	8.6848	9.42492	7.2234	7.15301	7.79767	7.16208	7.34497	5.55562	6.46343	7.66045	6.24273	6.12039	9.42113	6.22108	7.74497	8.77756	8.5675	8.66362	8.57425	7.84101	8.07902	8.13898	7.68075	6.93886	6.7636	7.39658	7.50788	4.6057	9.05258	9.1978	5.58549
PF3D7_0515400.1	9.59451	14.0249	11.3663	11.9386	9.62966	11.9185	10.7627	10.7235	9.34821	11.1396	10.1758	9.63326	11.4629	4.73463	8.96458	10.8145	12.6739	7.80446	8.44112	8.51917	10.8202	10.5049	10.5433	10.552	10.7127	6.60561	9.00262	10.8639	14.0994	10.8682	4.90451	14.3042
PF3D7_0515600.1	15.0242	13.8088	19.7173	14.3353	18.4234	20.1168	16.1758	14.4673	14.9392	16.081	14.6922	14.5695	14.3318	17.5505	14.1167	16.7708	13.23	12.9027	14.4161	15.9513	15.5241	12.8276	15.2844	15.8859	14.4157	13.5015	18.2577	15.5102	11.8964	16.2058	13.6559	12.5488
PF3D7_0515700.1	5.14028	7.8166	5.77065	8.92391	8.62668	10.188	9.45787	7.74826	6.39208	6.91698	6.83522	1.49437	7.29675	6.24854	4.39044	5.73212	6.17078	3.9988	4.47242	5.07847	7.7798	6.30186	7.41394	7.60817	7.02651	2.61842	1.52892	7.12356	7.65138	6.71091	7.16368	6.58327
PF3D7_0515800.1	7.78779	13.4994	6.05554	7.67875	6.78458	9.94144	7.64247	4.38545	6.1759	6.91529	8.81214	11.2468	5.47825	8.15125	5.98456	7.81596	10.227	8.36574	8.24839	8.24584	8.24746	8.00473	8.90434	7.77152	8.34349	6.37072	3.10343	7.20089	6.13409	10.4426	5.53496	7.44397
PF3D7_0515900.1	9.80396	8.70763	9.13752	9.68558	9.87823	10.0951	7.39936	7.50238	6.69314	8.25193	10.9302	8.35083	8.31304	10.4663	9.24762	10.2695	12.8064	10.2752	10.4183	9.61307	8.63309	8.4005	10.6862	9.23894	7.76344	7.9359	12.1505	9.16692	9.08173	11.0934	14.1185	7.81938
PF3D7_0516000.1	11.9147	9.20383	9.41455	13.1834	12.2674	13.5138	11.2565	12.9371	11.1977	12.2124	12.0818	14.0685	12.8404	11.3039	14.3144	12.0695	12.2695	11.0865	12.5283	11.8084	10.1956	10.0194	12.8012	13.3819	10.1263	11.1834	13.4016	11.7319	14.6889	13.3384	9.14095	13.822
PF3D7_0516100.1	6.10789	1.88287	8.60911	5.38488	6.16741	5.92357	7.29586	5.31101	6.30314	6.80075	6.16919	6.58066	6.28356	6.43744	5.96792	6.36066	5.60876	4.53752	6.26845	5.5587	5.95782	4.90237	4.61388	5.57115	6.43345	6.77058	6.83691	5.77723	6.15594	3.66005	4.9778	5.03415
PF3D7_0516200.1	6.03727	8.38063	6.45135	8.33509	7.80829	7.6497	8.11895	6.5684	7.09208	7.38975	7.94057	6.09208	6.96967	7.81584	6.01554	7.60275	7.26879	7.50699	7.25539	7.08088	8.58032	7.25698	7.35533	7.54177	6.49049	6.88999	7.0536	7.675	10.0963	7.47552	5.61616	6.96385
PF3D7_0516300.1	7.10175	7.16431	6.85172	8.11013	7.87902	7.88749	5.86171	8.20548	6.31101	6.74777	7.31194	7.22557	7.35221	8.19157	8.72358	7.8358	8.92812	7.41427	8.41564	7.34648	5.42999	6.1082	8.37695	8.74684	6.63782	7.68347	8.55257	6.99783	5.35358	7.8078	8.6282	7.07773
PF3D7_0516400.1	10.9908	15.7969	9.95596	12.8995	10.9134	6.82238	11.6693	14.3841	11.4838	10.8861	12.6749	8.38904	11.7393	10.2911	12.2714	10.6435	13.546	10.9371	10.5775	12.1778	10.4357	11.5529	11.596	11.0254	11.6638	10.8612	11.1782	10.6909	9.64537	13.5	8.37359	14.2129
PF3D7_0516500.1	15.5134	20.0056	27.0662	16.6378	21.373	22.1774	22.5763	17.0622	21.4459	21.1589	16.6897	17.307	21.8453	19.7879	18.3741	20.367	22.9921	19.6722	20.8345	20.8009	20.0649	20.4297	21.2154	20.6428	20.3513	21.6853	20.6878	19.003	19.4291	15.0386	18.0521	17.97
PF3D7_0516600.1	5.63648	5.46835	7.53315	6.67621	6.41287	6.35331	6.58488	6.6133	5.35851	6.31272	4.867	7.36284	6.23426	1.66175	8.01575	5.29948	3.45048	4.95432	5.45855	5.54154	4.12063	5.93479	5.76374	6.87363	6.82663	6.21189	7.54842	4.95006	5.52604	5.31471	6.46845	9.36972
PF3D7_0516700.1	4.28285	4.60609	5.61448	4.61799	5.0898	5.13506	4.27444	4.59317	3.97909	4.45041	4.65346	4.87858	4.66272	3.05634	3.33207	5.12942	4.27116	4.96354	4.28928	4.74573	5.8668	5.95614	4.58824	4.36352	4.83035	4.49434	3.86678	3.75544	7.03923	4.1498	5.82927	4.54082
PF3D7_0516800.1	9.11661	9.82719	10.8078	10.284	11.4525	9.905	11.1541	10.2794	9.42149	10.4095	8.90955	9.84444	10.4261	6.47506	11.2583	8.66272	10.0761	7.8297	8.63848	9.21253	8.44576	9.87848	9.99322	9.97928	10.1285	10.1899	11.9066	8.96743	10.4445	8.70716	8.3924	12.3914
PF3D7_0516900.1	10.2418	10.7464	11.1714	10.8987	10.91	11.2549	11.3405	10.2206	10.4228	10.4688	10.241	10.3984	10.3526	11.44	10.1042	10.6895	10.9775	11.0803	11.187	10.7546	10.9176	10.6486	10.8486	10.8383	10.6052	9.99147	10.2219	10.7235	10.4007	10.5736	10.3962	9.89688
PF3D7_0517000.1	7.60236	8.13776	8.65838	8.31544	8.4637	8.28483	8.29351	7.98212	8.42772	8.5283	8.02708	8.75782	8.49968	8.34756	8.37027	8.40191	8.49534	8.58301	8.54654	8.00849	7.9771	8.2159	8.47348	8.61554	8.41776	7.52637	7.47026	8.10982	7.28065	8.84913	8.38414	8.27215
PF3D7_0517100.1	6.47105	5.80768	6.51126	5.80666	6.4725	4.68128	6.26099	5.46245	6.37021	6.49474	7.00467	6.59414	7.08152	5.62289	5.86013	6.58053	5.31136	4.42321	5.1564	5.54973	6.59823	5.90318	6.1436	5.33996	5.50691	6.14172	6.40512	6.17806	6.41522	5.88453	3.99388	6.69733
PF3D7_0517200.1	8.18011	8.32372	8.77402	7.86235	8.07667	8.16887	8.88432	7.62996	7.61389	8.52889	8.04157	9.38301	8.55902	6.87313	8.13326	8.47589	7.01719	7.16481	8.28293	8.34395	8.38032	8.557	7.95076	8.34912	8.55003	8.04427	8.13603	8.28396	8.89604	7.754	8.08458	8.93938
PF3D7_0517300.1	6.92225	7.36083	6.56138	6.84712	6.70322	6.67086	8.52297	6.17554	7.48632	6.75675	6.66234	6.37392	7.00483	7.16676	6.53004	6.37461	6.69712	6.88415	6.73284	7.02881	7.41339	7.08181	7.25466	6.59259	6.99607	6.79866	5.2839	7.16613	7.3656	6.46119	6.0551	7.1439
PF3D7_0517400.1	7.3522	7.69563	8.76345	8.19743	7.00129	7.04332	7.58181	6.81954	6.899	6.52423	7.19771	7.08289	7.1803	7.40301	8.21997	7.21891	7.94902	7.88299	8.27198	8.29381	6.30604	6.79413	8.06086	7.94465	7.31691	7.34256	7.63221	7.54457	5.27752	8.17432	7.78494	8.26106
PF3D7_0517500.1	8.04676	2.46914	9.73205	9.73188	9.00707	8.63332	9.11314	7.76154	8.37691	9.4641	7.89934	9.76558	9.77057	8.96051	8.79106	8.96228	8.01878	6.56724	8.49472	7.29124	8.08847	7.771	7.37959	8.74289	7.69769	8.5419	10.0582	7.62265	10.0909	6.15377	7.18075	7.17337
PF3D7_0517600.1	6.82026	8.17141	5.78996	8.39301	6.91588	6.37983	6.84682	7.19019	6.98979	7.45422	6.87991	7.87788	7.29809	6.83085	5.7892	7.18651	-0.170868	4.77986	6.34424	5.78567	7.89512	5.87629	5.94507	6.67554	5.91945	6.20337	6.64929	6.31772	7.1485	4.51741	-0.43725	7.15145
PF3D7_0517700.1	8.26716	7.81129	8.97484	7.94343	8.11778	8.3617	7.8592	7.91283	7.89664	8.12234	8.20367	8.23966	8.08884	8.16352	7.47375	8.2903	7.80067	8.51831	8.60431	7.81756	8.73572	8.11827	8.34887	7.87041	7.95205	7.94024	7.0638	8.19725	8.5277	8.04705	7.52625	8.03391
PF3D7_0517800.1	17.9733	19.0434	18.773	20.3638	19.8547	16.4151	20.8762	16.5226	19.6663	19.6906	14.3692	17.153	20.2358	19.6816	19.9771	18.9683	15.9953	17.8999	19.7027	18.9928	17.343	17.6507	19.134	19.5503	18.3424	21.1728	21.2391	17.7965	17.9259	13.7534	17.8427	18.227
PF3D7_0517900.1	7.24604	6.09106	6.34222	8.59975	7.90148	8.81529	7.65459	9.33995	7.48078	7.76119	3.67591	4.91603	8.00839	7.352	6.8528	6.10811	4.73298	5.47616	6.53402	7.47312	6.62461	6.51027	6.55734	7.00051	8.28387	7.87325	2.89019	3.69774	6.54869	7.02136	5.45045	6.55464
PF3D7_0518000.1	10.8592	9.3384	19.3461	12.7811	11.0221	12.5703	12.4399	14.7032	12.1336	11.8164	11.8117	7.64931	12.3584	12.2383	10.858	12.2191	15.5662	11.9732	11.7885	12.4754	11.9116	12.2045	11.9242	12.0373	11.799	11.2188	13.2115	11.4195	9.61461	11.2454	8.84231	11.3197
PF3D7_0518100.1	7.51907	6.88027	8.09896	5.91334	7.06246	7.49808	5.36187	6.38582	5.22558	6.31774	7.48295	5.1995	5.69802	6.91754	4.53844	6.72646	6.51659	6.6165	6.53877	7.21016	7.97563	6.5314	6.52813	6.91527	5.3536	5.38902	5.08159	6.45132	7.09041	7.8764	7.28915	5.56164
PF3D7_0518200.1	9.66523	10.0494	9.92884	7.92659	7.07733	13.7676	10.8275	8.45207	12.0017	10.1726	7.50413	8.91646	7.91885	10.7473	10.1907	8.10047	14.279	10.7221	11.7916	11.0188	9.42078	10.8093	12.2331	9.35728	10.0287	11.0128	6.38501	9.90803	9.88494	13.0857	9.36909	10.2885
PF3D7_0518300.1	10.9723	12.6843	12.0862	4.96873	10.5345	12.1728	10.3868	11.5578	10.2498	10.0239	11.618	5.04738	7.66028	10.7648	8.12759	11.0613	10.4768	11.4843	11.3267	10.9666	12.4503	9.67755	11.3844	10.1552	8.69425	10.3517	10.5932	11.8482	12.2247	12.7132	12.9271	9.69378
PF3D7_0518400.1	5.75838	4.00965	4.33853	6.47689	1.39683	2.30018	4.05454	1.76056	7.32023	4.46036	2.16296	7.44133	6.54096	4.75131	5.53036	2.46013	2.70947	7.06959	6.48143	2.09507	4.18567	7.20862	1.0442	7.23412	4.16426	6.6632	8.09663	2.1412	4.75862	1.77372	3.07746	3.96925
PF3D7_0518500.1	6.16726	6.06014	5.25027	6.30413	6.21994	7.10082	7.14696	6.63624	6.5376	7.26965	5.57351	6.31957	7.08104	7.2233	7.06248	6.3951	6.06506	6.25052	6.56454	6.59719	5.9169	5.74963	6.21051	5.7956	7.25964	7.05162	7.11194	5.85731	6.55005	5.22855	5.59542	5.87237
PF3D7_0518600.1	9.50008	6.98138	11.8267	10.2319	8.80096	10.5002	9.48178	10.5802	8.82725	8.9159	9.35757	9.05998	9.16632	12.4917	7.61954	10.5942	9.02617	8.2034	9.57361	9.12194	10.4047	9.4432	8.65424	8.76365	8.82544	9.55771	9.57227	8.39819	7.49499	10.1866	5.75047	6.25961
PF3D7_0518700.1	11.0897	8.88366	12.3538	8.4264	9.99174	12.1381	9.20262	11.4124	8.60639	8.70262	9.77176	9.88888	8.59276	8.84587	8.85892	8.35519	11.5876	9.49918	9.71029	10.5975	10.2318	12.0124	9.97419	9.87153	9.73824	8.9151	10.1146	9.53621	9.27064	9.10082	11.7553	8.82176
PF3D7_0518800.1	20.3406	25.0216	24.2815	26.7098	21.163	23.0934	23.9326	21.816	22.2854	21.2264	21.7471	21.8743	21.8447	24.1761	21.8162	22.8885	27.6285	25.6647	26.3823	26.2339	22.8191	24.1709	25.0818	24.566	24.1068	25.3	16.9258	21.5086	24.0901	19.4069	22.6412	22.2612
PF3D7_0519000.1	3.28351	1.55128	1.89808	-0.38802	3.74749	0.315374	2.27907	-0.140551	2.9453	3.33751	3.11528	5.25485	2.4522	2.7595	2.42155	0.476428	0.950934	2.26307	1.51134	3.23768	2.87268	2.88774	3.73102	3.37835	-0.354318	3.52478	-0.741628	3.02295	2.48558	-0.0367878	1.07549	2.63726
PF3D7_0519100.1	7.39768	4.17385	4.87619	7.32903	6.29406	6.33982	8.94012	8.38212	8.5353	7.4985	7.50723	4.45581	7.43259	7.59156	4.97126	6.05676	3.19331	4.42895	6.33133	7.23267	8.99152	5.76291	2.79637	8.78765	6.54891	6.07163	2.21429	6.62233	11.911	6.95412	4.36387	6.2987
PF3D7_0519200.1	6.72037	10.1063	10.9721	8.08381	8.41221	7.50293	8.08421	8.20063	7.95788	6.9409	8.21443	8.46367	7.31198	3.20823	7.88139	8.10487	9.47703	8.40024	7.78951	7.83731	8.06504	9.44768	9.0493	8.6362	8.1654	6.36826	7.74331	9.14018	9.20821	9.09592	8.35512	11.6377
PF3D7_0519300.1	7.45413	11.0367	9.02597	7.90107	8.27905	3.50335	8.31224	7.36123	7.67316	7.46755	6.97648	7.45	6.93588	10.0658	5.92936	7.07902	4.42723	7.78019	8.27869	8.20193	9.08555	9.50265	7.14422	6.93242	6.66362	6.47292	8.76179	7.56521	3.23685	7.56623	3.6619	5.89934
PF3D7_0519400.1	9.78029	9.35416	10.2997	9.42405	9.34769	9.14964	9.97894	9.32898	10.0692	9.34138	9.283	9.2196	8.73954	9.78017	8.24315	9.663	8.84299	9.45096	9.43155	9.20706	10.4746	9.94534	9.45474	8.96158	9.24144	8.10601	8.3462	9.60827	9.30243	9.25852	8.63335	8.84998
PF3D7_0519500.1	10.8245	11.2588	12.0327	9.77428	10.8621	10.4402	9.16032	10.0048	8.8822	10.0683	10.9376	9.5697	9.52139	11.7634	10.2194	10.5516	12.065	11.4594	12.2261	12.403	10.2808	10.0123	11.6988	11.4957	8.87512	9.94676	11.1174	11.0662	9.26283	11.2569	11.6126	9.79097
PF3D7_0519600.1	6.0717	6.56637	8.74247	5.78633	5.36218	5.14299	5.38339	6.8486	5.5992	5.29788	5.97927	6.35938	4.9071	2.83665	7.13951	5.70318	6.80891	6.05325	6.10861	5.5237	4.34581	6.53347	7.17064	6.43438	6.39041	5.08588	5.60566	6.35711	2.67017	6.84628	8.02567	8.71993
PF3D7_0519700.1	8.68479	8.22362	8.61843	8.09169	7.71299	8.31109	8.58085	7.98109	8.63671	7.98409	8.68146	7.91516	8.22183	8.55535	8.14994	8.54986	8.93401	8.93903	8.35325	8.47986	8.49297	8.11139	8.51566	8.36892	8.24783	7.8683	7.81283	8.81528	8.34302	8.44322	8.93217	8.34152
PF3D7_0519800.1	7.90694	8.39435	8.89405	7.7949	7.89163	8.04984	8.84436	8.1241	7.83489	8.40246	7.44611	7.87105	8.38643	8.07282	8.11916	8.29063	7.67927	8.208	8.65857	8.99869	8.23999	8.31226	8.15626	8.40121	8.43533	7.82145	7.90716	8.62796	7.98592	8.34153	8.56561	8.32897
PF3D7_0519900.1	7.63264	10.2462	7.595	7.55025	7.56618	8.20754	7.35653	7.36851	7.73681	7.37513	7.4996	8.78103	7.74598	4.90675	9.1896	7.72015	8.60051	6.65382	8.20491	7.90579	6.0819	6.19913	8.32045	8.98581	6.84626	7.63615	10.019	7.46201	8.82753	7.61285	3.5438	10.7755
PF3D7_0520000.1	8.93543	8.82682	9.18277	9.10956	8.67157	8.73779	8.92203	8.7223	8.96379	8.73372	8.71159	8.25834	8.20376	9.00533	8.13255	8.98911	8.05988	8.76932	8.71777	8.12879	8.97552	8.67145	8.98919	8.61453	8.60512	7.67853	8.09956	8.56327	7.81703	8.12228	8.61632	8.3009
PF3D7_0520100.1	5.67004	7.60124	7.18459	5.74926	5.90515	6.0332	5.56277	6.58436	5.20255	5.60782	6.26469	4.09354	5.43693	3.03445	6.54379	5.95889	7.29489	6.70338	6.14421	6.54634	5.03704	5.17	6.43248	6.99529	6.49092	6.15102	5.2637	6.12981	6.75507	6.13227	8.44399	8.48594
PF3D7_0520200.1	3.29881	5.89796	1.4446	4.52823	5.49504	4.19566	4.46746	4.81543	4.18495	4.07419	2.30181	3.01424	3.19329	5.30172	4.18004	3.84644	5.37233	4.37489	3.69816	3.00987	3.38667	4.47067	4.83171	3.26337	4.91534	4.16924	3.91644	3.31571	2.30006	4.05416	5.83552	2.52076
PF3D7_0520300.1	5.55247	1.96904	12.2495	6.11508	6.16177	5.56235	6.39271	8.12466	6.88572	5.57666	6.56556	0.201866	5.47398	4.18002	3.48651	6.16533	-0.861864	5.77886	4.81575	6.30995	8.39689	6.52651	7.72614	4.10046	6.16717	4.28514	-1.94822	6.46604	3.90918	7.83383	10.1493	7.75164
PF3D7_0520400.1	5.47421	3.39193	3.80061	4.88291	5.80447	1.42899	4.99338	6.71788	4.49031	4.52185	5.24701	7.37577	5.11816	4.66781	5.59705	5.04839	2.53983	5.18969	3.35784	5.3834	5.43488	7.27618	4.29912	3.90827	5.03071	4.62481	6.44569	5.66427	4.14068	5.72742	7.75449	4.80232
PF3D7_0520500.1	5.79676	3.82655	4.8952	7.44883	6.41921	5.42868	5.7516	8.29051	6.19804	6.04831	6.55225	7.90949	5.86806	7.14187	6.1748	5.34019	2.06891	5.07349	5.68662	5.57079	6.35593	6.57145	5.20234	6.74993	5.08713	5.68555	4.66166	5.84779	5.1378	6.97468	3.05511	5.76731
PF3D7_0520600.1	7.50723	4.14148	7.96742	6.85382	7.02086	7.23477	6.5976	7.02431	7.6085	7.65847	7.33951	8.09725	7.03774	6.87536	6.92578	7.4086	7.3936	6.60129	6.5346	6.41195	7.32212	6.88145	7.10953	6.20121	7.01053	6.53536	5.5711	7.04849	7.26591	7.87957	6.89621	7.09919
PF3D7_0520700.1	6.35207	6.07716	4.3466	5.93026	5.98995	5.33051	6.3794	6.17409	5.97953	6.28844	6.1251	5.63772	6.78389	5.76051	8.27443	6.17262	7.20519	6.90012	6.77306	6.37167	4.159	4.3226	6.46839	7.42274	6.03297	6.88001	6.47076	5.28397	6.22131	6.54759	8.01662	7.54212
PF3D7_0520800.1	6.48443	9.00523	6.82539	4.94532	5.15534	5.07784	4.30462	5.6349	3.9242	4.40741	7.07068	3.18772	3.19686	3.32436	4.3876	6.24592	8.13661	6.50697	6.19999	6.29351	6.23035	5.87612	6.89533	5.62496	4.56143	5.11952	6.06236	6.10046	7.43158	6.50677	7.82075	7.04447
PF3D7_0520900.1	7.96964	8.51209	7.55333	8.12421	8.37267	8.26018	7.90083	7.84216	7.47931	7.47934	7.69705	6.06989	6.96993	11.1704	5.32809	8.62386	8.76332	8.79003	8.54192	8.33277	9.79873	8.96376	8.10069	7.84531	7.27564	7.14359	6.68651	7.77151	8.17837	7.03117	9.49556	4.0318
PF3D7_0521000.1	10.0095	13.3636	12.6989	10.6502	10.5063	10.7325	10.0721	10.6195	9.23507	10.2138	9.52649	7.32903	7.89038	9.90817	7.59993	10.6932	12.1322	11.1639	12.0654	12.089	12.5162	12.1057	10.5336	10.3863	10.1671	9.09423	9.90921	11.0105	12.6774	11.4877	11.4951	9.67241
PF3D7_0521200.1	7.19274	5.8281	5.84499	3.8252	3.55162	9.0786	7.77538	4.08483	9.08961	6.27585	7.64437	4.47127	3.83861	6.49134	6.59081	4.65644	4.93477	6.74465	6.7622	4.31249	6.48502	5.28543	7.09537	2.40741	6.92574	5.67022	9.80796	8.10057	6.08771	3.57565	5.25454	6.58438
PF3D7_0521300.1	6.56204	5.67759	5.38474	6.43626	6.37575	5.74864	7.13247	6.9145	7.21874	7.14119	5.88466	7.06248	6.68815	6.74078	7.28462	6.12344	6.75671	6.61281	6.47181	6.59061	6.06353	6.80308	6.25636	6.12149	7.42091	7.15461	5.81693	6.01877	6.3814	5.85222	7.30688	6.44383
PF3D7_0521400.1	10.3493	8.65037	9.15776	11.4695	10.1385	13.4246	11.9184	9.88132	11.6313	12.2343	9.92204	10.8821	10.6494	11.4321	12.9654	8.90475	5.40236	11.292	11.2832	10.863	9.51408	8.02148	11.8099	10.9089	10.478	11.6842	7.29606	10.665	9.79763	13.4857	8.12205	13.4254
PF3D7_0521500.1	6.85673	4.88564	5.49669	8.91845	6.99519	9.61157	7.36709	7.92936	7.71208	7.86223	7.27936	7.71163	6.62762	4.90926	8.91482	7.37512	10.2194	7.1933	6.40148	7.69901	6.00219	7.14296	8.75768	7.44127	7.40523	6.42884	6.60686	6.089	10.707	8.84826	9.29689	9.43623
PF3D7_0521600.1	2.3208	1.14616	6.80391	6.12462	4.23865	4.39887	4.47182	5.32842	4.81661	4.90437	0.0907302	4.08983	4.38677	0.504324	4.79874	3.72875	0.214794	1.69518	0.458954	4.24116	2.61707	4.00069	4.31125	2.49304	4.45382	4.10375	2.59915	2.13111	1.91516	5.2514	-0.126033	6.54494
PF3D7_0521700.1	4.7876	1.13918	1.0485	4.33707	4.28875	0.630849	5.27811	6.13438	4.912	5.51261	0.634108	4.24105	5.83349	8.26764	4.33909	4.76362	1.13636	5.27607	3.11036	5.13962	4.26404	5.80603	3.93803	4.73764	4.03445	5.91531	-1.24455	0.707877	1.41965	5.6892	7.82677	0.845903
PF3D7_0521800.1	5.42557	6.29953	6.49167	3.4676	8.27733	4.49606	8.20397	8.86436	8.33723	8.61552	4.21177	4.03924	9.9198	6.86676	7.91207	4.73403	4.84327	6.09194	6.20225	8.50161	6.09923	7.38612	6.15238	6.66932	6.82105	8.80694	7.94479	4.1707	6.74377	3.6098	5.26733	6.39901
PF3D7_0521900.1	7.37291	5.49168	5.46359	7.35275	7.99961	9.38224	9.85594	6.8646	9.94056	8.9555	6.90796	8.93598	9.11845	7.2698	10.2845	7.66354	9.0846	6.30061	6.75031	7.84542	6.45749	7.84748	8.10383	7.47556	8.35365	8.42398	10.75	6.63959	9.56953	9.10197	9.06788	8.63996
PF3D7_0522000.1	9.74131	14.792	6.51867	4.13689	8.03519	10.2206	9.95362	13.7397	11.3792	9.423	11.571	5.55667	10.0021	6.82124	9.67101	10.2219	11.688	9.85738	8.66238	10.0921	10.3323	10.3171	10.7875	9.74127	9.52048	8.46632	10.7837	10.689	13.6235	10.6989	11.1806	11.9633
PF3D7_0522100.1	3.88681	6.62887	5.17969	0.718443	2.7081	4.23483	2.05788	2.88786	2.38629	1.88005	4.39345	5.02541	2.00583	2.0038	2.10946	4.13954	6.84286	4.65292	4.83888	5.37046	4.62032	5.23206	3.62476	4.25712	3.06237	3.72989	4.59042	4.32685	5.61228	4.43538	4.63135	3.38471
PF3D7_0522200.1	7.65669	3.84383	4.65531	7.31627	6.26151	7.00186	6.91307	9.89913	7.16403	7.30227	7.54776	10.2368	7.30735	7.91371	10.425	7.57674	9.34371	7.70864	7.18636	6.42029	4.61776	7.21598	7.77381	8.11009	6.98275	6.37608	9.45157	7.41122	5.19084	8.74039	9.23334	7.43985
PF3D7_0522300.1	4.97135	3.3056	4.3248	6.71069	6.00707	5.64069	5.99415	5.95527	6.62014	5.9364	4.43885	4.85082	5.60657	6.26881	6.04655	4.5698	4.19351	5.44232	4.74828	4.83971	5.07736	5.54344	5.44138	5.39236	5.71388	5.46286	4.03021	5.2555	4.74409	5.46511	6.59505	5.10376
PF3D7_0522400.1	9.2656	9.20646	10.4108	9.60706	9.52672	8.84006	10.2431	9.02892	8.38455	8.37017	8.35932	9.58911	8.73364	7.78723	8.44493	10.0168	9.14111	8.17132	8.80641	8.19633	9.45417	9.17046	8.56291	8.54938	8.94732	8.53094	11.2499	8.72938	10.29	8.77619	6.86605	9.30603
PF3D7_0522600.1	3.99349	0.978226	5.49242	-0.0957216	3.7176	4.00542	2.82126	-0.1435	3.79345	3.25979	4.25851	6.11416	4.22725	1.47857	2.01635	1.32131	1.67971	2.92222	2.97337	1.18023	4.86052	3.46119	-0.253427	3.25456	2.51501	2.88409	4.77721	3.74222	5.88836	4.09396	1.06691	3.30431
PF3D7_0522700.1	9.51588	13.783	12.9359	10.8989	8.51491	5.93088	9.70403	4.33363	9.68559	9.08039	10.271	12.3683	10.9568	8.35194	8.15368	10.9281	7.25976	9.93441	8.266	9.7216	11.1654	11.1812	9.56204	8.77727	9.30563	8.63663	10.1245	10.6458	6.63378	11.9271	7.01176	11.2305
PF3D7_0522800.1	4.09734	4.69203	3.42429	3.50932	3.55262	4.7996	3.36801	3.49952	3.56149	3.59478	4.74593	2.69267	3.48511	4.27357	1.65547	4.45102	2.12745	4.25723	3.39413	3.4182	6.03962	4.6035	3.25326	2.67274	4.1568	2.79893	2.43194	4.06158	5.1762	5.67136	5.45264	2.69058
PF3D7_0522900.1	8.30332	6.37469	10.4956	9.93852	8.26386	8.98334	9.13668	10.4789	8.50095	8.60883	8.19264	10.0143	8.58262	8.26416	8.22226	9.63973	4.9642	6.94568	8.21439	7.07223	8.40493	8.83627	8.71377	8.44264	8.77959	8.10349	9.29142	8.10299	6.87489	3.2208	5.7037	7.64835
PF3D7_0523000.1	6.77147	5.95154	7.6599	6.26212	7.46551	7.35573	6.3548	6.7143	7.13501	7.17439	7.25898	7.77294	7.27788	6.8296	7.16455	7.03121	6.79415	6.98207	6.99241	6.68855	6.87662	6.85393	7.22845	7.21345	6.77467	7.67303	6.63621	6.98963	6.86444	6.59372	7.42195	6.94526
PF3D7_0523100.1	4.61524	8.15739	6.23974	1.98456	3.5391	4.30457	3.79512	3.72005	3.83371	4.15966	4.30808	5.75582	4.85956	1.78596	4.66181	4.69443	4.23795	4.92639	4.05842	5.10958	3.70937	4.822	5.59425	4.65518	4.70718	3.76427	4.23629	4.18865	1.89613	4.54101	4.13079	6.36838
PF3D7_0523200.1	7.06718	2.63056	8.99593	6.51229	5.91314	6.56714	4.91183	5.18588	5.70281	5.92534	6.17608	6.55779	5.274	3.60456	6.84229	6.3016	7.45739	7.79675	6.94052	7.16609	6.1809	6.03816	6.56821	5.50172	5.489	5.57282	7.60966	6.33332	9.23268	8.41475	8.67995	8.33824
PF3D7_0523300.1	9.99316	13.7174	6.41023	8.96286	8.97237	5.9337	10.1655	6.52806	10.6433	9.33757	10.7227	7.2645	9.26619	9.51965	8.69507	10.239	12.6894	10.4575	9.42316	9.32718	10.7249	10.1134	9.33698	8.81409	8.97576	9.46455	11.3894	9.91719	12.8058	10.5726	12.1524	9.65225
PF3D7_0523400.1	9.75606	12.133	10.6563	7.95085	8.54017	9.80843	6.77098	9.28028	4.97183	6.61134	10.4716	9.83235	6.13238	7.91141	4.26003	10.2916	10.1243	9.32299	9.4377	9.47687	12.0888	11.6622	8.99615	9.5637	7.72581	7.51784	5.55766	9.59748	11.1754	9.85502	10.5456	6.88864
PF3D7_0523500.1	12.1898	10.9823	10.6748	13.5174	8.2826	9.91949	12.2449	9.372	9.247	10.8837	12.9277	9.75644	8.99296	11.4834	10.8432	9.49032	9.65331	12.315	11.7607	13.1694	10.3054	9.69312	11.221	12.0245	10.3426	11.1861	7.27262	8.69443	10.5777	7.91661	10.4006	11.7005
PF3D7_0523600.1	11.2528	10.3771	9.79528	9.09901	11.2528	10.0579	9.91287	9.32777	11.1834	11.3615	8.5947	14.0458	9.19401	10.2306	10.4112	9.66547	9.70182	11.3824	10.6755	9.15271	10.9953	11.536	11.6564	10.7915	9.16834	8.48371	7.42842	13.0245	9.62787	12.5423	10.0548	11.199
PF3D7_0523700.1	5.95183	3.87362	7.92693	6.67954	5.68347	6.84484	4.64623	4.56642	5.41312	5.66432	7.31304	6.16664	6.34429	5.41577	5.41497	6.88302	9.02228	6.11514	7.55612	5.10601	6.7337	6.83315	6.51222	5.99433	5.33721	6.3316	7.75591	6.22495	9.07487	5.68666	7.97289	5.6967
PF3D7_0523800.1	3.53569	4.69568	3.36274	4.02647	3.85299	4.62653	4.47128	4.29538	4.81792	4.58535	3.50853	3.82379	4.79269	4.30644	4.64962	4.05467	1.9757	4.30472	3.97277	3.808	3.97423	3.5353	4.15912	3.66752	4.79221	4.75109	3.74937	4.43597	3.55907	4.50438	3.1377	4.72896
PF3D7_0523900.1	3.86063	7.67478	2.67168	3.94507	2.42312	3.53008	3.49127	4.71592	3.81589	3.11752	5.7414	3.73058	4.11513	2.72594	5.54306	3.82657	6.84842	5.81299	4.51995	5.12338	2.89778	4.91459	6.05561	4.99443	4.63595	3.77799	3.64456	5.32119	3.08551	4.69863	7.34472	6.41897
PF3D7_0524000.1	9.05163	8.38889	8.80465	8.66213	8.22088	8.7911	8.06011	8.22269	7.80621	8.69965	8.99778	9.04536	8.93143	9.02252	8.53947	9.08415	8.04227	9.06271	9.30965	8.65392	8.81309	8.55091	9.10093	9.11769	8.02289	8.98446	8.54562	8.79544	8.96345	8.05009	9.11557	8.42449
PF3D7_0524100.1	3.84479	4.38078	3.36543	5.13871	5.50329	5.22313	5.32468	4.31666	4.91896	6.09213	3.89952	5.19475	5.59087	4.24536	5.75523	3.95649	4.53049	4.85035	4.76933	4.80618	4.15356	4.57805	4.12829	4.96809	5.77523	5.78832	4.7164	3.68447	6.12424	4.30467	5.25479	5.23206
PF3D7_0524200.1	6.81191	3.5223	9.90841	5.98422	8.46276	2.72284	7.91695	7.07509	7.27022	7.68932	7.31578	0.990841	7.9657	4.37144	5.79813	3.68013	4.22767	7.32636	7.05158	9.08485	8.44308	9.65118	6.99455	5.72954	5.36638	7.04479	7.30828	2.43216	10.9084	1.64298	10.7671	7.36456
PF3D7_0524300.1	7.71164	8.87197	8.12044	5.05384	7.57367	7.90644	7.70035	7.3907	6.93454	7.24674	7.38708	7.40951	6.53231	9.25087	7.022	8.70704	10.4408	8.18278	8.73567	8.80227	7.49322	7.62456	7.60498	8.44819	7.37812	7.65173	9.20221	7.87844	6.61622	7.43385	9.95112	5.19964
PF3D7_0524400.1	4.47409	5.90628	3.65101	6.38115	5.45845	5.71141	5.25749	5.66961	5.67783	5.12706	5.2042	4.77856	5.23919	6.28251	5.30408	5.28695	5.1116	5.4037	5.45152	5.22468	5.28332	5.43009	5.79688	5.67126	5.26755	5.72764	4.36803	5.1909	5.42102	5.36889	5.39187	4.82533
PF3D7_0524500.1	4.87563	0.151402	0.744491	4.88407	3.35984	-2.08898	3.46263	6.212	5.47217	4.17654	4.80036	4.79474	3.51735	6.24672	5.56446	2.82721	5.98673	3.71043	2.32425	3.49431	2.76583	5.01302	3.62246	2.99222	2.37707	3.09465	3.68877	3.72036	1.06681	5.56057	3.75426	3.22289
PF3D7_0524600.1	7.9393	3.95606	9.24466	8.41563	6.67205	10.0174	8.80545	7.74872	8.53466	8.18195	6.39695	3.68518	8.54876	10.6459	6.44349	7.91477	10.3101	7.86773	7.72229	8.48058	8.50661	8.20554	7.21269	8.53648	7.46579	8.91603	9.19714	7.94076	10.0962	2.32039	10.5073	3.64913
PF3D7_0524700.1	7.71333	6.6562	7.39137	8.50506	8.28904	3.54549	6.80425	9.66046	8.10212	7.03695	9.33583	4.90237	8.42819	8.96662	8.32231	7.90607	10.2346	8.75445	7.87613	8.4968	7.38684	8.42697	7.26759	8.59221	6.52797	7.47022	10.2916	7.01353	7.49046	8.26979	11.2326	6.93153
PF3D7_0524800.1	7.62534	3.64001	12.4064	8.26957	8.05469	8.81064	5.98598	7.99458	7.3388	7.11017	7.64338	8.31646	6.6189	7.06379	7.01028	6.79456	8.2316	8.18008	7.6629	7.03999	7.1553	8.72477	8.40799	7.28257	7.37377	7.04695	8.48945	7.07755	5.25744	1.56039	8.67415	5.89097
PF3D7_0524900.1	5.97119	6.65275	5.34601	6.18881	6.39607	6.18031	6.17431	6.46113	6.16304	6.76766	5.74256	5.95532	6.53928	5.64493	6.86053	5.72579	5.41218	6.23211	6.35225	6.22972	5.66621	5.87328	6.26912	6.1573	6.67279	6.64607	5.92287	5.65693	6.30433	5.72591	6.35987	6.8959
PF3D7_0525000.1	8.36836	11.5577	6.34935	9.13992	12.2814	10.6091	8.50396	10.4472	9.26258	9.20124	8.73725	7.92582	9.38265	6.31037	6.91485	8.72992	3.35838	6.02306	5.82584	7.63797	11.0753	10.9873	8.60441	8.82706	9.17422	8.83987	8.55033	8.10166	12.3144	5.79242	10.7163	8.46473
PF3D7_0525100.1	6.05265	6.0033	5.03555	6.73933	7.35986	8.01421	6.75437	6.08165	7.12895	7.14541	5.73184	6.84508	7.44697	7.00034	6.08742	6.4087	4.10951	5.38261	5.42906	5.44864	6.78525	6.31024	6.49164	6.25435	6.66655	7.22604	5.51206	5.44001	6.99294	4.37902	5.48429	5.3827
PF3D7_0525200.1	4.00202	2.89497	3.35157	3.74435	4.55745	4.15752	5.6628	4.26973	5.38884	5.1489	3.96855	4.69215	5.6523	4.02713	5.05665	3.68768	2.3283	2.70392	2.07652	2.69165	3.54056	3.74673	3.16521	3.49767	5.01997	5.24814	5.27587	3.11371	3.25778	2.23028	2.67668	4.0566
PF3D7_0525400.1	7.31181	6.42713	6.0242	6.27814	8.08135	6.15522	7.79778	6.07689	6.38416	10.0498	8.45277	9.98762	10.2117	11.9483	8.27597	9.10372	5.31336	8.79873	9.03044	5.1797	7.0121	4.71889	3.61919	7.79539	8.74986	10.1449	12.3594	5.29529	6.04778	4.67404	5.52194	3.53029
PF3D7_0525500.1	7.4613	7.6934	7.85307	6.9215	6.94982	6.19229	6.97585	6.01501	5.55676	6.96504	7.64681	6.39852	7.04174	6.71161	7.20647	6.99895	8.67433	8.00917	7.81725	8.38466	6.76629	6.6716	7.24195	7.10177	7.01192	6.98729	7.63238	6.66076	7.36723	7.23498	8.69443	7.48796
PF3D7_0525700.1	11.195	10.688	10.4624	10.0826	12.0054	9.37622	14.1514	10.3739	12.7743	12.2241	13.9108	10.7173	9.75931	9.32031	12.4526	7.88842	13.8427	9.02487	10.5283	7.66046	9.45225	10.3752	12.4048	13.0623	9.83747	10.8376	7.50619	11.1493	10.1769	7.71368	9.34446	13.9851
PF3D7_0525800.1	8.43131	14.981	7.24845	10.56	6.59732	7.49091	10.2279	11.5067	10.1852	9.37194	10.8112	5.9313	10.7592	8.13887	6.241	11.9212	12.6902	9.19106	8.56393	10.0642	13.3268	13.2322	9.43023	9.16977	9.17697	8.3421	9.39555	10.3779	17.1835	10.9476	7.27737	10.0706
PF3D7_0525900.1	16.0202	16.4694	15.6211	14.7296	13.634	15.8165	16.7283	15.1014	17.4566	15.1582	13.796	15.3364	14.7696	15.9003	16.2925	18.2043	14.9143	13.6853	16.5809	17.9655	15.2765	14.5172	15.8355	15.8771	15.3847	13.7014	17.7895	18.0992	15.0336	20.1196	15.814	16.4705
PF3D7_0526000.1	9.18875	9.9631	8.51594	8.73179	9.64028	8.92047	9.1531	5.49169	8.73746	9.94496	9.01985	11.5446	8.71556	10.4481	10.2922	9.63096	10.3222	10.3046	11.6411	10.9483	7.95397	7.62567	10.4942	10.9287	8.12345	8.23161	9.35572	9.12859	8.42844	8.79755	10.3712	9.01461
PF3D7_0526100.1	11.9061	15.1781	9.05097	9.79099	11.81	8.53259	13.4817	9.75033	14.0112	12.436	11.7059	9.90375	12.3102	13.742	10.1538	11.8054	6.29269	10.4955	11.4756	10.8083	12.4231	9.45216	12.1706	10.5311	11.5284	11.4772	6.79244	10.1606	9.13696	7.01887	7.61265	10.5787
PF3D7_0526200.1	10.0314	12.0246	6.89918	7.35953	9.51956	9.35681	10.258	12.3267	9.31995	9.18385	10.1606	7.0886	8.95174	13.1149	5.97601	10.0244	9.99955	9.45432	9.98255	9.36589	12.4583	9.79224	9.27738	9.20109	8.90989	8.59811	4.64392	10.284	11.4159	8.39689	6.24561	6.0629
PF3D7_0526200.2	-1.17362	4.56639	-0.497566	0.0817978	1.9155	3.01649	2.11167	-1.97588	2.61197	2.70745	-1.15701	-1.71094	2.0117	4.98668	-1.62455	4.57471	3.52574	3.00331	1.00905	3.71991	3.32928	-0.0388754	3.94621	2.40661	-1.47187	2.56903	-2.50425	-1.15641	5.6347	3.01805	-1.8322	-1.7693
PF3D7_0526300.1	6.48634	7.03109	1.8207	6.64112	5.6529	5.9496	5.69541	6.72481	6.17892	6.36782	6.97498	6.79441	5.48388	7.35413	5.30231	6.6765	5.99835	5.90057	5.36726	5.31098	7.21965	7.24026	6.78215	5.03144	5.92609	5.61785	4.75414	6.35564	7.76001	6.03215	6.70949	4.83536
PF3D7_0526400.1	5.82559	1.64991	8.27784	6.89124	4.78121	1.43957	5.77525	7.60311	5.97825	5.9951	6.67819	5.40785	6.95271	2.64842	6.09041	6.17403	0.431371	4.78754	3.27426	4.00207	5.57201	6.6515	7.21866	3.99346	6.67295	6.36674	0.586298	6.57734	3.05547	0.840353	8.85088	8.21653
PF3D7_0526500.1	6.62982	6.68998	7.10538	6.68409	6.50692	6.79646	7.60259	6.87605	6.47957	7.1553	6.51003	7.20148	7.87999	5.8337	7.5431	6.6195	6.76065	6.72647	6.89944	6.99292	6.43432	7.10883	6.94261	6.72183	7.52401	6.95631	7.198	6.82503	7.14757	6.21096	7.03169	7.79796
PF3D7_0526600.1	8.53138	9.97364	9.85126	6.11861	6.4676	7.91684	8.6993	5.27096	5.15176	6.11892	8.61202	7.02434	6.7742	9.36978	5.27486	8.92893	8.63002	8.23572	9.92093	9.20519	9.48661	7.77871	8.42853	9.03571	6.2728	7.57264	5.46702	9.52816	8.0235	9.46337	8.68918	6.50655
PF3D7_0526700.1	7.75504	8.93115	8.95373	6.90514	6.81258	6.26888	7.21554	8.03707	6.67484	6.24973	7.6102	8.67349	6.49668	5.37932	8.73772	6.80168	8.1657	7.23907	7.84257	8.4354	5.84077	7.74082	7.98287	8.03312	7.48267	6.91486	7.87126	7.47224	4.37127	9.2955	7.42285	9.74929
PF3D7_0526800.1	9.58317	10.7306	9.64746	8.43825	7.79519	7.7637	8.95404	9.37734	8.45609	8.58839	9.60732	6.32252	7.97571	9.51514	8.22173	9.44918	10.0461	10.0322	10.3297	10.5857	9.70987	9.50487	10.293	9.7903	7.76383	8.38021	7.96402	9.9183	9.3562	10.0367	10.9571	9.28266
PF3D7_0526900.1	7.47139	8.35883	9.42687	7.82278	7.41888	8.16862	8.08335	8.82999	7.89973	8.23237	8.26334	6.30713	7.58216	8.34133	7.79434	8.40787	9.33974	8.78117	8.95002	8.79877	8.23806	8.19062	9.09416	8.76317	7.47263	7.86663	7.33432	8.92449	8.1539	8.66299	8.43009	8.393
PF3D7_0527000.1	9.69222	11.7577	10.0165	10.1471	11.4555	11.2651	12.6954	9.58128	11.3201	10.8991	8.60239	10.7369	10.8465	13.1555	8.40049	10.0119	11.8971	9.03653	9.78676	10.0919	11.6048	10.8427	9.34381	11.0902	10.1113	10.5685	8.79243	9.63588	10.5422	9.24605	4.76148	7.42027
PF3D7_0527100.1	5.6035	7.8468	7.13434	4.89962	5.80383	6.33338	4.39037	4.02903	4.67555	4.86321	6.29409	5.58923	4.20401	8.5693	1.41879	6.43236	7.74973	7.47169	6.84461	6.86354	9.33815	8.59378	5.28311	5.45831	4.97866	4.84475	4.66702	6.67859	7.09572	6.09471	7.15893	1.26748
PF3D7_0527200.1	8.86927	9.6917	10.7429	9.92477	9.35187	9.36661	8.85605	10.037	7.8769	9.40604	9.48803	7.93336	8.42473	8.49788	9.68028	9.50795	10.0435	9.54619	10.3534	9.81927	8.56026	8.60295	10.3683	10.0607	8.82463	9.52735	9.21023	9.46986	9.05932	9.44286	9.73257	10.4806
PF3D7_0527300.1	5.57613	5.83668	7.81854	6.24674	5.04191	4.91698	4.79625	5.62896	5.44613	5.04175	5.54964	6.87036	5.49428	0.524621	7.45477	5.69788	7.54422	5.85405	5.75839	5.79069	3.85384	5.84417	6.29224	6.39865	6.3229	5.5483	6.26298	5.3078	6.32595	6.13397	7.4904	9.871
PF3D7_0527400.1	5.75803	6.06852	5.53932	6.55046	5.65932	6.04856	5.86071	4.57588	5.6867	6.06297	6.35481	5.22602	6.23772	4.88379	4.53023	5.58522	5.66624	5.37867	5.15042	5.38894	7.26761	6.52137	5.92991	5.09835	5.76103	5.82346	4.18957	6.40879	8.79495	5.01788	5.57696	6.24929
PF3D7_0527500.1	7.85011	8.52195	8.02075	9.51954	8.887	9.13048	10.0024	8.25403	9.48309	9.19729	7.98338	9.29533	9.0102	8.78424	8.73044	8.40254	7.20166	8.05381	8.20871	8.14228	8.69454	8.89188	8.64079	8.32185	9.56382	8.52721	7.79846	8.57706	8.35779	7.22455	7.70549	8.55084
PF3D7_0527600.1	9.00056	9.72208	9.61407	6.5076	8.00735	8.23105	6.75876	8.73131	6.99448	7.1058	9.49629	8.65373	6.49854	4.40285	6.08328	8.66718	6.67029	7.55703	7.55684	6.99172	9.49588	9.38726	7.7092	8.49604	8.03575	7.33983	6.86555	8.67804	10.0621	5.8878	10.3454	8.85405
PF3D7_0527900.1	4.16186	5.36154	4.07114	6.27012	5.6917	6.00892	6.47417	5.20087	5.70849	6.58963	3.99972	5.37429	6.2506	5.26177	6.24898	4.78691	4.38703	5.21749	5.14093	4.95264	4.59565	5.05862	5.11147	5.79362	6.16813	6.08681	4.96685	4.41829	5.59462	4.6938	4.62973	5.73888
PF3D7_0528000.1	6.40495	5.27485	6.34142	7.69973	7.14408	9.03303	6.39451	10.0156	7.72743	7.02757	8.5125	10.7384	6.3413	8.16944	8.246	8.97397	9.60475	8.33636	7.72108	7.47366	7.08438	9.46221	8.8051	7.01493	8.20448	5.94711	7.99189	7.38819	6.47492	9.5569	10.5233	6.25628
PF3D7_0528100.1	6.03461	7.24588	8.85598	4.73197	6.1099	6.74845	4.32382	4.43802	4.58525	5.35336	6.28773	5.15312	5.06086	8.01857	1.60552	6.55858	6.70671	6.90867	6.83429	7.01041	9.38941	8.63946	5.58889	5.74975	4.92445	5.49408	4.63057	5.93317	6.76244	6.08586	7.24037	1.88904
PF3D7_0528200.1	7.74983	7.91308	5.44514	7.38669	7.82296	8.21901	7.62309	8.08788	8.38968	8.03848	7.84818	8.2368	7.97561	8.7802	7.96328	7.79491	7.96872	8.13254	7.93517	7.58671	8.01233	8.00905	7.92098	8.15423	7.51885	7.92756	7.55777	8.03992	8.96513	7.85262	8.25403	7.10974
PF3D7_0528300.1	4.20801	2.88783	3.23358	5.58745	6.83755	7.94105	2.81728	6.34878	4.39545	5.5247	3.33219	6.42226	3.14641	3.72532	4.14515	1.18584	1.76127	2.13292	2.11386	1.145	3.79668	4.83286	0.899292	6.68283	4.36835	4.16277	5.85702	4.77998	3.66777	0.990471	2.18245	2.6079
PF3D7_0528400.1	12.0131	10.4424	16.2861	9.01755	12.8775	12.4124	12.2665	14.4153	11.5648	12.2268	13.0907	9.20265	12.6505	9.45946	10.5287	12.2802	7.79288	9.65586	9.75188	10.9385	13.2683	12.4914	12.5106	11.546	11.3046	10.423	10.4148	13.2427	10.4695	12.546	13.481	13.1639
PF3D7_0528500.1	7.35335	10.6025	7.88789	7.47635	8.07843	8.02288	8.86422	7.2788	8.27092	6.80954	8.20229	3.49092	6.68453	11.9746	3.223	6.73267	9.43374	8.29728	7.90812	8.7059	11.5914	10.393	7.335	6.16608	7.45144	6.24195	6.32357	8.59558	8.34203	7.125	7.00322	3.03261
PF3D7_0528600.1	4.6705	9.70248	2.20136	4.51831	4.0602	3.80423	5.10605	5.10647	5.35779	3.7631	4.42311	5.63325	2.80673	1.83888	4.32893	3.08949	6.79429	4.03771	3.57132	4.00282	4.58153	7.30135	5.87465	3.28909	5.84607	1.99359	2.15294	4.96337	3.29087	6.60072	4.46527	6.78554
PF3D7_0528700.1	4.28592	6.30088	4.5711	3.83526	4.99494	5.10955	3.90543	4.77697	3.90232	4.12995	4.53022	4.93191	4.55325	6.47102	2.24813	5.83293	5.23742	5.20802	5.14121	5.49242	6.45916	5.63799	4.57767	4.69945	4.06937	3.92045	4.27045	4.71606	5.76186	3.47451	3.5333	1.7021
PF3D7_0528800.1	6.01965	4.79535	4.58102	5.4252	5.1245	4.66066	5.4437	5.8563	6.05388	6.46296	6.01922	5.73444	5.93596	6.58181	6.31786	5.88211	5.16373	5.84139	5.68884	5.70296	5.63165	5.72337	5.57642	5.35939	5.67339	6.37915	5.96676	6.05746	5.48572	6.25508	6.95598	5.51201
PF3D7_0528900.1	16.1158	13.984	22.8113	15.7591	14.8631	11.6943	16.5181	16.1989	16.1788	15.2529	17.0783	15.8707	15.2127	15.4533	13.1717	17.4773	18.4258	14.5896	15.5411	15.6676	17.6991	17.7461	15.7204	15.3856	15.025	15.3197	13.2997	16.3384	14.0283	15.5453	12.7955	15.4784
PF3D7_0529000.1	4.6058	5.11063	4.35584	5.27414	5.02849	5.283	4.95286	5.28448	5.09402	5.42984	4.33577	5.51572	5.39722	4.26788	6.24906	5.17686	4.91586	4.99207	5.03538	4.51549	3.44173	3.97965	5.52439	6.01277	5.11407	5.28806	5.17268	4.34328	4.30265	3.04904	4.80351	5.6895
PF3D7_0529100.1	9.91675	10.448	10.7122	8.06875	11.6102	13.0928	10.3311	9.13865	11.1309	11.4408	6.61991	9.94556	10.9445	11.969	11.1021	10.0626	8.10694	10.6239	11.3722	10.8909	10.5292	10.4053	11.3324	10.5755	8.82627	12.2913	13.7202	11.2068	10.4824	13.356	9.68488	9.68373
PF3D7_0529200.1	9.9534	9.32867	9.46147	12.2177	8.61605	7.51736	9.71636	8.3385	10.4584	9.82108	12.2002	9.08889	9.43194	10.8595	9.59488	10.0963	7.63143	9.56804	9.85734	6.46123	10.2641	8.94971	5.59919	10.1336	9.76892	10.6236	13.807	9.11674	9.29663	13.327	8.8945	9.4772
PF3D7_0529300.1	10.3017	9.87323	10.1718	8.43195	7.87201	12.7363	9.10509	9.77727	10.7888	10.4681	10.6022	10.7336	10.4927	11.658	9.87891	10.8517	7.51722	9.72295	11.9502	9.41931	10.5083	8.85309	6.70768	11.0711	10.933	10.0381	13.3823	11.2588	9.90661	12.0709	9.39862	8.55451
PF3D7_0529400.1	14.5543	15.4729	15.5265	13.1597	15.908	12.6692	15.7869	15.038	13.2945	15.8905	16.6054	16.1999	12.855	17.8885	14.8184	16.6594	12.5259	16.4284	17.743	18.2141	16.0287	14.2509	17.2373	16.9214	12.5008	16.5609	11.7435	16.0635	14.7739	17.1104	15.0222	14.927
PF3D7_0529400.2	3.07646	-0.159836	1.99503	0.000259253	-2.31888	1.25943	-1.31736	-0.900066	0.430902	-2.84385	2.79215	-0.622781	0.409245	-4.9404	-0.127767	-2.03655	2.432	-2.46371	-2.59604	-2.94525	-1.11233	-0.756584	-3.84297	-3.72517	3.48801	-3.14809	2.03829	-2.28096	-2.79167	3.6072	0.64239	2.41261
PF3D7_0529500.1	3.45311	7.23659	1.44806	3.63409	1.51384	3.81342	0.986468	3.40108	3.21057	1.72332	1.50719	4.12405	1.26866	3.12477	2.99869	3.68796	6.96018	5.51852	4.01335	4.38917	2.73015	5.25641	3.92578	4.09913	4.02299	2.49659	2.95528	4.55856	2.04864	4.42154	7.51305	2.36553
PF3D7_0529700.1	0.262169	-2.57766	3.91806	2.24386	0.365496	-0.801356	-1.6853	-4.13113	0.14067	-1.11159	-0.970608	-1.21634	-2.10301	-1.59055	-1.46928	-2.83974	3.26223	0.721436	-1.03309	0.982661	-0.82868	0.162654	-2.82478	1.57492	-0.317824	-1.95245	-0.38465	-0.294493	-1.18452	-3.25167	4.27425	-1.52389
PF3D7_0529800.1	9.19434	8.45112	8.71486	9.61036	9.51161	9.81335	9.52276	6.48387	10.085	9.05934	7.53554	6.95774	9.40766	9.47987	7.60454	9.02266	11.5731	8.84374	7.53249	10.0846	10.4747	9.58388	8.35812	7.31541	9.13437	8.90275	10.0973	8.97306	12.4956	10.1009	10.3325	7.59496
PF3D7_0529900.1	3.84593	4.26309	3.16592	4.79549	3.77172	3.91614	4.588	3.74334	4.84839	4.48446	4.1819	3.49215	4.208	3.04258	4.20142	3.97524	4.35046	3.17924	2.94595	2.0059	3.73141	3.61775	4.68842	3.95416	3.73545	3.93327	2.84262	4.12735	4.45251	3.69989	2.60776	5.28236
PF3D7_0530000.1	2.13896	2.82841	3.24507	3.43762	4.88504	2.78581	4.54813	3.37638	4.5174	3.43267	3.35322	2.49821	3.61166	4.63701	1.61313	2.95336	6.49289	3.44241	2.87722	3.35089	5.11311	5.28462	3.33206	2.25713	4.27337	2.75149	1.14147	3.82305	5.03159	2.16148	4.29989	1.29314
PF3D7_0530100.1	4.56862	6.43371	0.270926	4.84613	3.89552	4.77699	4.99367	4.197	4.77323	4.9573	4.56832	5.73391	4.3548	5.1133	3.75968	5.07335	3.56856	4.29636	4.13657	4.01506	5.45227	5.56404	3.91059	4.42446	5.49504	4.4381	3.18501	4.26271	6.51689	3.49873	5.9391	3.22832
PF3D7_0530200.1	8.7757	7.85005	7.7043	5.68469	7.91047	6.69552	8.25956	5.76326	8.33366	8.67791	6.06008	10.6165	10.7639	7.8096	8.96731	6.81832	6.62825	8.29202	8.42008	9.58054	7.49758	8.73313	7.98144	7.76419	7.92603	9.13337	8.51311	6.07287	7.83047	5.27158	6.96403	7.8247
PF3D7_0530300.1	8.53978	5.91081	10.7611	8.14059	7.31112	7.93028	8.42082	7.13861	8.41907	8.21401	8.69642	7.43507	8.01161	6.27694	5.04195	9.21616	5.53265	7.12177	6.97105	5.43503	10.8084	9.9131	7.18506	7.41331	7.46625	4.26224	6.53751	8.96525	9.71148	8.73577	9.89292	7.63045
PF3D7_0530500.1	1.74795	0.810476	1.35646	1.90203	0.670558	-0.666252	1.71379	3.48627	3.62092	2.29842	1.34366	0.562395	1.56077	2.32985	1.54365	2.18091	-0.176555	1.56431	1.5999	1.434	2.2937	1.96364	0.0531358	-0.400657	3.07482	2.9466	3.26378	1.27638	1.93528	-0.737337	0.365202	0.823021
PF3D7_0530600.1	6.65799	7.05151	6.48057	7.69959	7.14903	7.96106	8.53094	6.63622	7.18054	7.66255	5.83028	6.09361	7.44031	7.82777	6.75874	6.68393	7.21903	6.85667	7.06606	7.62297	7.3918	7.23149	6.7493	6.63918	7.95631	6.69938	6.74729	7.11035	7.82955	6.51832	7.1917	6.30475
PF3D7_0530700.1	5.93392	7.33789	7.18401	6.48682	5.28765	4.83606	5.28886	4.96775	3.79218	4.16877	6.0084	6.04092	4.36657	1.82287	6.11172	6.14748	7.66536	6.81975	6.50723	6.83882	4.74333	5.50497	6.65546	5.60663	6.32728	4.3448	5.10937	5.16015	6.44681	6.83786	8.32751	8.67388
PF3D7_0530750.1	2.81517	6.50095	-0.363483	-2.95822	0.454682	-2.05495	0.186458	2.85149	1.21422	-0.493644	2.35145	-2.22638	0.234042	0.758175	0.713617	-1.65413	-0.794464	2.87072	2.40706	4.47711	2.59456	2.85175	-1.72139	-1.82942	3.66009	0.738332	4.32384	2.70462	0.26987	3.0252	5.49739	1.35741
PF3D7_0530800.1	17.7535	18.1578	17.6368	22.0327	21.1227	16.4474	21.7945	21.7584	20.4611	19.7297	19.9465	17.0457	20.8762	23.3138	18.8434	19.4502	13.9253	17.8443	19.5553	18.3095	20.4174	18.3516	20.0348	19.9279	18.906	20.4444	12.6036	19.4583	17.2092	19.7204	15.8798	18.8801
PF3D7_0530900.1	11.5022	10.235	13.5408	10.2423	9.36032	12.697	10.9957	8.86766	10.8262	10.0765	11.2643	12.8745	10.2037	9.67681	10.4124	10.2258	12.9702	10.89	10.4762	9.42157	10.6425	11.5184	10.4777	11.4271	10.5675	10.0963	10.6387	10.8073	9.41426	12.6234	9.85363	11.3036
PF3D7_0531000.1	3.38276	5.86026	1.09928	5.01802	4.91657	4.72508	4.95946	5.14247	4.29503	3.70294	4.15503	4.26144	3.10112	3.71974	4.69961	2.35719	4.19842	5.0626	3.19897	2.65472	3.21309	4.90028	3.10385	3.33969	6.10905	3.34621	4.41564	1.88282	2.51951	4.46908	5.55027	3.76691
PF3D7_0531100.1	10.0872	7.97894	11.3617	10.6398	8.76509	11.0672	10.1949	8.22657	9.04368	9.6149	8.92471	12.1769	10.4843	8.74496	11.1378	11.3802	11.9666	9.17508	8.97203	7.79344	7.52662	7.96088	10.1546	9.63897	10.226	9.9224	11.5809	8.739	7.63778	9.37591	8.31215	10.3007
PF3D7_0531200.1	7.26338	6.5979	6.43619	5.77612	7.98346	10.2845	7.40901	6.20164	8.41698	7.22858	4.8106	6.63672	5.83297	7.08998	6.41267	5.22599	11.6598	7.44347	5.45828	5.20747	7.26842	7.39031	8.3831	3.83921	7.99361	5.15471	4.67089	8.29233	6.57589	9.83446	6.30771	6.67406
PF3D7_0531300.1	6.89217	5.24216	5.58081	2.48868	6.96335	3.3954	7.51687	8.88098	7.09221	6.07527	7.30974	3.66818	7.0732	6.93052	6.14749	3.2425	4.15297	5.72151	5.50329	8.09756	6.44953	4.22595	2.05677	7.64948	6.49171	6.51696	1.8939	6.2544	5.84153	8.5367	4.70775	6.71258
PF3D7_0531400.1	5.77376	4.57394	4.2752	6.32565	6.06893	5.48256	6.03819	6.41977	6.5227	6.44305	5.8773	6.5885	6.27006	6.27921	6.78968	5.12393	6.60728	6.3163	5.71995	6.83705	5.68108	6.1272	5.56682	5.50901	6.13573	5.9298	6.24334	5.5517	7.2872	5.83944	5.5466	5.99906
PF3D7_0531500.1	-1.54966	1.22782	-5.29753	-7.16819	-2.48455	-8.10826	-4.92505	-0.224425	-2.94174	-3.34765	-1.64587	-6.42032	-4.1392	-5.67132	-2.72655	-4.75495	-7.24397	-1.32118	-5.42739	-3.50337	-2.57179	-2.62658	-4.32061	-4.96192	-3.97635	-4.59376	0.328725	-1.48861	-4.43349	-0.459715	-0.37147	-0.662323
PF3D7_0531600.1	10.8173	10.267	8.4531	11.5132	10.1833	8.51214	10.6703	12.5753	14.5538	9.01826	11.1313	8.59908	9.63941	12.3468	9.60979	11.8847	9.1284	9.09579	9.17353	8.88147	11.2052	10.4126	10.3133	10.0734	9.80976	9.19981	10.5175	11.1228	9.41621	8.88603	9.38808	8.83455
PF3D7_0531800.1	8.19281	3.94185	5.39149	10.6794	8.20556	1.41518	9.27528	5.74025	11.9056	9.54317	7.48122	7.57911	11.7401	11.4681	6.89548	8.4597	1.16886	6.7452	7.20101	0.138702	10.6885	7.07296	4.35205	2.6667	10.2883	9.58766	4.22389	9.27077	6.53684	10.3264	4.66591	7.02742
PF3D7_0532000.1	12.275	12.9766	9.63932	11.2564	11.2617	9.7345	16.2287	12.8117	15.5864	10.0135	12.0349	9.34412	10.8267	11.5485	9.84908	12.9544	9.59963	9.24817	9.18121	7.67218	13.4784	12.7524	12.4048	10.1999	10.7311	9.24022	11.9376	12.0643	12.4867	8.98196	8.65823	11.2061
PF3D7_0532100.1	9.90293	10.0691	9.64744	9.99027	10.8566	9.70711	11.459	9.22773	10.7786	9.46928	10.0339	9.20509	10.071	10.5326	10.0631	9.5896	10.0045	10.357	9.85755	10.1307	10.2485	10.1672	10.9874	10.4554	8.93568	9.53354	10.0173	10.0073	10.4718	10.0427	10.2321	10.1245
PF3D7_0532200.1	8.88415	13.1155	4.75588	9.65023	9.31145	9.19222	9.4421	11.5199	10.1605	9.37331	9.33029	12.5117	10.5622	8.81811	11.2017	10.625	5.28676	9.98967	9.85211	10.1927	9.63638	9.96544	10.2141	9.93611	9.10348	10.0378	12.2061	9.84321	12.172	10.4771	5.66808	11.6183
PF3D7_0532300.1	14.3285	14.1011	14.2507	12.2659	13.091	14.8342	12.3239	11.5872	11.546	12.4108	14.2556	13.9693	13.647	14.1887	13.0699	14.1368	13.7882	13.7576	13.8077	13.3044	13.4058	12.3196	13.946	14.5413	11.7619	14.9304	14.4179	14.0662	13.2948	14.19	13.4776	12.8696
PF3D7_0532400.1	13.7135	13.0844	13.3279	13.2172	13.5461	15.2974	12.2234	12.5104	9.86905	13.1641	13.8446	13.9849	14.2526	14.3694	13.1959	13.5367	12.8028	12.7784	13.0376	13.1856	13.0384	12.0969	13.4076	14.1769	12.0285	15.3013	14.2048	13.7386	13.34	13.6287	12.443	12.4395
PF3D7_0532500.1	9.91977	7.1438	8.04241	6.03353	11.5647	10.4583	7.78567	8.2322	9.06869	9.98201	10.5015	9.7458	10.7764	10.7167	7.10009	7.67536	4.52819	6.25158	7.07651	9.61425	10.3091	6.15732	6.26701	5.08757	11.7912	8.30834	5.91935	8.92453	7.72669	3.71693	7.12541	5.68994
PF3D7_0532600.1	11.282	9.22865	9.72528	12.6928	14.6769	15.8126	12.8673	11.3103	11.0093	13.6581	12.1618	16.8989	15.194	13.4697	13.8766	10.0517	7.22947	8.5628	7.28641	11.4809	10.8142	11.2909	8.07751	12.5398	13.7257	14.5126	15.9325	11.6605	9.51714	11.4072	9.92356	10.0203
PF3D7_0533000.1	2.48285	0.735337	1.17879	3.39353	5.15893	5.19114	1.53724	-0.442912	2.34224	2.77972	-0.657903	0.0641712	-0.746892	1.91047	1.42025	-0.667464	-0.108414	-0.850007	2.10877	-0.592714	1.63647	-0.0123005	-0.322396	-0.668197	2.35347	1.49059	4.67435	-0.607014	1.84333	5.05119	0.205659	0.918143
PF3D7_0533100.1	10.1423	11.3049	8.33013	8.43582	6.36689	5.36464	9.02437	7.31153	5.7989	7.7707	10.1805	7.769	6.72643	7.84567	8.46002	10.7868	10.9998	9.74877	10.221	11.0836	8.95095	8.12287	9.81946	9.14389	6.69648	8.54912	10.1461	9.91248	11.4937	10.7476	10.2727	10.3735
PF3D7_0600100.1	6.93604	10.1455	10.3327	8.39288	10.6872	8.79171	13.7	9.65943	9.29779	8.30309	7.42435	10.4824	8.81867	13.194	16.1728	7.53236	17.9709	15.0371	15.784	19.7096	5.48953	7.86098	13.5632	13.978	8.58473	13.6331	15.3797	15.407	10.8082	7.1739	9.96378	12.0622
PF3D7_0600200.1	5.00821	6.85734	7.76224	3.05504	3.15844	-0.0829325	5.45348	3.3383	1.29781	2.31932	4.67949	-0.381286	1.73109	4.33051	1.79087	5.93927	7.19973	6.49147	6.82824	8.05591	6.59174	6.23063	5.06233	5.00261	2.47673	6.4194	4.90103	5.54919	7.74948	5.11694	10.0407	3.78661
PF3D7_0600300.1	7.08001	4.78453	5.31508	10.1408	7.85263	2.58692	6.3753	3.24666	7.36112	7.87803	1.92419	11.1281	6.85963	6.35838	6.08439	7.56805	3.08252	5.25186	5.6432	2.04163	5.84988	5.57266	2.30509	7.32143	7.06361	6.26531	7.42779	5.8081	5.53413	2.15161	4.05186	4.40281
PF3D7_0600400.1	14.5897	15.2749	9.84022	11.6613	9.6361	10.9154	12.8275	8.99326	11.2477	10.7676	14.8623	12.4222	13.0734	13.9424	10.648	14.6601	13.108	11.9575	11.6636	15.0565	14.6593	11.3889	12.6186	11.6833	9.97287	13.0997	14.082	14.6273	17.4617	12.3765	9.37973	11.9292
PF3D7_0600500.1	-1.39737	-4.87302	-3.93593	0.00838986	-1.51583	-6.38625	-2.66672	1.22779	-1.17606	-0.889001	-6.08358	-5.1101	-6.34815	-2.52635	-4.0281	-2.70338	-5.22449	-3.33686	-4.03084	-5.89539	-2.0743	-2.57911	-3.58626	-4.09521	-3.15158	-3.86067	-5.55514	-3.03127	-2.91266	-5.51644	-4.38545	-3.77353
PF3D7_0600600.1	6.66479	1.38343	2.48127	-1.08417	3.79006	-1.18287	4.29284	-0.0683997	3.49776	3.09559	6.72799	3.12278	-0.99573	4.61271	-0.0406636	5.32624	-0.895734	3.49376	2.90204	-1.50001	6.58961	2.41544	6.64804	-1.00276	0.0956608	1.98119	-1.10172	5.92789	3.48891	-0.770423	6.42603	1.60195
PF3D7_0601000.1	18.8392	15.1463	14.963	13.0761	18.6537	21.689	22.9454	14.9057	20.6862	15.3365	10.9238	15.9712	19.3253	18.7026	20.9915	20.6099	13.7537	17.0281	18.1218	19.2718	15.633	10.5923	18.7007	16.6766	16.834	22.2187	21.5598	17.3947	21.9992	20.9841	15.71	18.9014
PF3D7_0601200.1	6.48201	4.34351	4.63278	8.56038	10.1876	3.07186	7.88833	4.2031	3.49033	6.99254	8.13043	5.04684	3.11229	6.56139	4.21138	1.68073	3.66867	1.75762	2.28353	2.49267	7.59534	6.01543	3.03658	2.73653	6.25382	7.35874	3.0784	7.78505	4.75102	8.25373	4.53364	5.76082
PF3D7_0601300.1	2.22893	-1.01635	-0.503948	2.68579	-2.70832	-2.34555	0.293698	-2.93745	-0.241909	-1.66791	1.40805	4.01172	1.39973	2.15133	0.531859	2.11523	-1.39938	0.441252	0.0585472	1.12233	1.06523	0.903486	2.12122	-2.17145	-0.524131	2.68313	0.940055	2.13613	0.241668	-2.23733	-1.53526	0.0842555
PF3D7_0601400.1	2.71478	1.54536	1.74699	-0.482498	-0.00363859	0.563082	3.31498	5.56913	-0.0737779	2.44496	0.650008	5.77506	6.83156	2.17144	2.73566	1.2133	1.13732	3.30551	2.83534	0.756405	2.55856	5.02129	-0.566363	6.40417	2.01572	3.22648	-1.05395	3.28133	2.37717	4.95443	0.937868	2.6636
PF3D7_0601500.1	7.16819	10.8779	4.5096	5.77746	5.97949	6.06362	5.53764	7.70563	7.16645	3.71461	7.5136	2.29189	5.20623	5.12559	5.81381	5.85964	9.83001	3.41123	5.28957	7.39771	5.53465	6.47477	5.249	5.64601	8.90835	6.72545	7.36092	7.24575	4.85779	4.11206	11.4953	5.64073
PF3D7_0601600.1	0.642236	-1.54268	6.6404	1.59977	-2.697	3.41423	-0.2796	2.16022	1.09901	1.42974	2.01418	4.13244	0.504007	-0.689024	0.306608	2.80721	-1.57895	2.02698	2.66809	2.1188	0.829942	1.68729	-2.55709	3.21732	4.09028	1.83965	0.852936	-2.1504	-0.357712	-2.54611	2.07321	-0.100283
PF3D7_0601700.1	2.97483	-2.15142	-1.24133	-3.64778	-0.791381	-4.06186	-0.410533	2.65263	-0.388952	0.423867	3.00361	4.72067	-3.8218	0.134374	-0.884072	1.32435	-3.0451	1.04723	-1.04648	0.0607506	0.957231	0.133239	-1.52327	-2.15979	-1.50315	-4.23372	2.85274	-1.05105	-0.564848	-3.4649	-2.44814	-1.99123
PF3D7_0601900.1	12.8623	12.1288	12.338	10.9819	11.6556	12.4989	9.7418	12.8547	11.2857	10.8872	13.2704	10.9424	11.772	12.0131	10.5298	12.448	11.6169	11.0119	10.2749	11.7858	12.8096	11.8068	11.3283	11.8165	10.9786	12.8587	12.2013	12.8515	12.1846	11.6837	12.0345	10.8293
PF3D7_0602000.1	9.52691	5.93081	11.7046	11.3535	10.2196	11.0317	10.8374	11.8003	10.5225	10.3373	8.55801	11.8131	10.6076	7.43471	10.651	10.1373	4.91874	7.55931	9.02923	8.13513	10.0292	10.3804	9.65938	9.16565	9.72095	10.1042	11.2894	9.50949	11.3166	9.48858	5.71771	11.8837
PF3D7_0602100.1	6.59696	6.6234	4.87084	6.9209	6.37506	7.01639	6.56743	6.92914	7.43097	7.15503	6.20833	6.52096	7.15101	7.26559	7.14878	6.5126	6.08772	6.46397	6.24732	6.59569	6.40572	6.73963	6.67659	6.53448	6.78454	7.32284	6.91822	5.99593	6.88163	6.35124	6.60338	6.28887
PF3D7_0602200.1	7.63996	10.584	8.8006	5.81701	6.26205	8.66371	5.33356	8.02684	4.7992	5.33446	7.89031	5.91637	4.77801	5.62551	4.67144	8.38003	10.4682	8.14149	8.25903	9.41419	8.93876	9.05428	8.38121	6.87674	6.52982	5.91263	7.03863	7.80657	9.78302	9.59943	9.30766	6.94203
PF3D7_0602300.1	3.10253	1.29636	1.88449	0.332074	1.70064	-0.143747	2.22408	1.32657	0.75626	2.88846	3.93125	2.20437	0.285646	3.6751	1.06957	1.87972	0.391526	2.82698	1.86081	3.37508	3.69831	1.75632	1.16753	0.647022	0.790115	2.52927	0.503628	2.08386	2.34151	7.12358	1.31141	1.89936
PF3D7_0602400.1	6.44216	3.41461	10.6864	6.07377	8.45464	9.64539	6.59991	8.51545	5.22543	6.86213	7.39213	9.62402	7.13774	7.17051	9.78327	6.47974	10.4713	8.59365	7.91883	9.00881	4.61693	7.04832	8.1674	9.15555	6.61538	7.59561	10.1937	6.6507	4.37613	8.72551	9.40372	7.32416
PF3D7_0602500.1	5.74926	2.34958	9.98591	4.61699	5.60569	3.80651	4.88295	7.43317	5.55529	5.65056	4.69537	7.76422	5.39337	2.21897	6.29243	6.05051	6.07484	6.19323	6.08658	5.87736	5.34013	5.26832	5.4661	5.94605	4.50524	6.28813	5.29917	5.75412	7.81545	5.88466	1.25979	8.66668
PF3D7_0602600.1	6.61058	5.51971	4.10924	5.32854	5.88426	5.74869	5.54882	5.66714	6.12543	6.53751	6.10209	7.05256	6.28669	5.86264	6.72708	5.78151	5.08945	6.10066	5.86157	6.26337	5.90436	6.13157	6.16136	5.79888	5.9546	6.77218	5.45653	5.74529	6.89173	6.5262	7.54	6.39527
PF3D7_0602700.1	9.28857	7.39626	8.05008	10.1459	8.54287	8.83209	9.43374	10.1553	9.31989	9.35042	9.50959	11.6363	9.08568	9.51101	9.64368	9.07821	13.0287	7.66591	7.77974	8.29323	7.99787	9.04031	9.0049	8.93021	9.63962	8.37812	7.78836	9.32973	8.1397	7.40603	6.28218	8.56041
PF3D7_0602800.1	2.54213	2.85539	2.954	2.98562	2.82666	3.08136	3.11716	3.36827	3.92881	4.34258	2.65536	4.28873	3.65583	-2.03649	5.7482	2.12444	2.51953	2.70609	1.38992	2.68835	0.942823	3.3085	3.80122	3.49684	3.71679	3.51244	3.54238	1.27552	3.78436	3.31894	4.03842	7.57731
PF3D7_0602900.1	5.58784	3.42748	4.30431	5.38372	5.37975	6.9831	5.57548	7.07922	6.14351	5.87708	4.57619	8.07099	5.773	5.45444	6.96416	5.57309	6.77245	5.65893	4.39833	6.08558	5.0209	8.01611	6.17359	4.9644	6.86612	5.08076	6.31492	6.05098	4.68468	7.30048	9.89184	5.10227
PF3D7_0603000.1	3.91593	3.37933	3.77093	2.75766	3.26672	3.96397	3.75778	4.34231	4.31484	4.3273	4.1505	4.51118	3.77678	2.81784	4.52643	3.43514	4.91292	3.7822	3.16496	4.08071	3.27776	4.14942	3.48817	3.66378	4.75058	4.14929	3.70116	3.8852	3.66342	3.52801	5.02796	4.40011
PF3D7_0603100.1	3.89666	6.15715	6.21613	9.04224	7.34796	8.53402	6.82623	4.39618	8.10765	7.70893	4.31042	4.79905	8.54431	6.88701	6.67466	4.8272	5.02951	5.55946	5.82818	7.2776	6.07358	5.51182	6.53843	6.21099	8.40962	8.06174	3.00445	7.09431	6.49622	3.81064	5.49151	6.67055
PF3D7_0603200.1	3.67092	3.08659	3.43534	6.06143	3.34191	5.25994	3.57553	2.01152	3.69485	4.2635	1.17469	2.57262	4.20465	4.22978	3.76988	1.18783	1.97086	3.28607	4.38468	4.08581	3.98851	4.33498	1.32573	0.956007	5.45927	2.68799	7.84148	3.92974	3.86148	4.79943	2.54601	3.00857
PF3D7_0603300.1	7.32953	8.79962	7.34617	9.86282	7.8355	7.64195	5.14719	8.71042	4.42492	6.69247	7.98685	1.66904	4.97569	8.51463	4.61471	7.28101	7.57045	7.41115	7.35868	7.51774	8.39766	7.22171	7.72237	7.32751	5.77899	6.61987	6.55895	6.99707	7.80246	6.9365	9.4719	5.20681
PF3D7_0603400.1	9.68674	10.9587	9.39682	9.44782	9.51237	9.19191	7.85185	11.6594	8.48835	9.19225	9.81278	8.60948	7.86996	11.8442	9.67257	9.53476	10.0944	9.41922	9.96704	10.3451	8.53162	9.81102	9.97036	9.39291	9.73933	9.73481	10.629	9.57723	4.38129	9.69777	11.291	7.41755
PF3D7_0603500.1	7.82821	5.97722	6.38008	8.92466	7.78329	8.37991	6.81186	6.34064	8.35391	8.26055	8.13689	7.15996	8.26682	9.10398	7.68086	7.14075	3.99797	6.71067	6.54366	3.94193	8.23371	7.33724	7.5619	6.65791	5.98268	8.84823	10.142	8.60387	7.32381	8.35508	5.83287	7.13396
PF3D7_0603600.1	4.99247	6.65776	2.74278	2.60047	1.62492	5.368	3.50538	7.75548	3.55579	2.91771	4.50774	1.27296	2.52392	3.00598	3.70319	5.24658	2.63392	4.36767	4.63943	5.54318	3.94784	4.27859	3.18228	4.05331	6.0063	2.44879	4.01919	3.3562	3.25058	6.1238	9.16269	3.99801
PF3D7_0604100.1	4.16029	4.56857	7.26264	3.41078	2.88456	4.69292	3.91089	3.79947	4.22097	3.3085	5.49438	4.29352	4.19597	1.80043	3.26968	3.58083	5.70666	2.95297	1.55432	2.08781	3.83317	4.07908	2.85723	4.03649	3.82977	2.99854	4.90649	3.97187	2.04788	5.29708	0.306904	5.22615
PF3D7_0604200.1	5.41686	4.56544	4.66462	8.01603	5.9142	3.6441	3.99557	3.75282	8.29329	5.0743	2.95331	4.19914	3.4569	5.30134	4.50565	3.17246	10.3425	5.4253	5.64709	3.08756	4.4534	7.2339	7.67193	7.31858	1.70876	2.81467	2.48159	3.03034	5.07031	2.71827	4.05782	4.46113
PF3D7_0604300.1	3.16997	7.5955	2.14026	4.77134	3.80467	5.11963	4.22191	5.12641	3.89568	3.9985	4.14996	4.14665	3.96864	1.64804	5.42304	3.54568	3.89602	3.95461	3.54464	4.31259	2.48439	4.72599	5.34619	4.78289	5.60286	3.15363	3.5406	3.32536	2.55776	3.52217	6.36094	6.12392
PF3D7_0604400.1	19.3919	18.078	17.6834	20.5945	18.5946	16.2494	19.9837	15.4821	20.5621	19.3342	15.0999	24.3406	19.3319	17.8718	16.5313	21.3494	14.564	14.3111	17.9691	14.4291	19.9415	21.4672	18.8153	18.0437	17.9642	13.7458	18.828	19.0016	17.5996	13.5794	16.3265	16.2859
PF3D7_0604500.1	9.18471	8.9275	8.73225	8.32624	9.15529	8.92962	9.69864	9.19143	10.1434	9.7395	8.79716	10.0302	9.92638	10.1631	9.80142	9.00076	9.5792	9.29887	9.82761	10.3499	9.12508	9.58309	8.88413	9.22673	9.84023	9.90666	9.63093	8.8929	9.21947	8.53861	9.24808	8.59741
PF3D7_0604600.1	6.18705	4.04257	4.21119	5.03967	6.92421	6.70026	6.60306	4.84335	7.42173	7.62072	5.9116	8.7845	7.93195	7.52282	8.88709	4.62049	2.10933	6.16313	6.58372	6.37617	5.03312	6.4371	6.03218	6.51389	6.27979	7.81052	8.47469	5.05405	4.31153	6.57433	8.07457	6.14462
PF3D7_0604700.1	6.92491	6.67348	6.21297	5.86145	5.3204	6.62682	8.96904	10.5565	7.51675	9.02667	5.42682	10.0317	8.26025	6.56022	7.11505	10.3972	6.56534	7.329	7.96281	6.07292	8.79381	10.5426	7.907	9.03574	7.01427	10.8787	4.70067	5.5947	11.8192	8.94009	6.55488	7.66871
PF3D7_0604800.1	7.56691	5.83579	5.84014	6.51877	6.95251	5.20562	7.80669	8.28578	7.95531	7.24755	7.72019	6.02994	9.0852	7.93066	9.76666	7.48028	5.34866	7.69018	7.61963	8.32862	6.39075	7.69255	8.1783	6.68738	6.88734	7.91965	10.3258	6.55998	6.18897	10.515	11.1813	8.42436
PF3D7_0604900.1	3.5062	3.58624	3.91978	5.65139	5.11775	2.00958	4.98002	7.50458	5.96986	6.30334	7.77436	8.46749	6.13147	5.76169	4.76915	7.67992	10.9185	4.91278	6.61197	6.95106	7.88051	7.93018	6.74991	1.43053	7.39918	5.79091	1.27904	7.34714	10.526	8.64355	3.62886	6.19376
PF3D7_0605000.1	6.76993	4.30894	5.08423	6.91282	6.20899	7.10169	5.10338	2.25111	5.77257	5.97885	7.67519	9.45026	6.44266	6.44919	6.21618	6.47648	2.43183	4.47282	5.66243	5.75667	6.03269	7.15871	6.63609	7.30147	5.38824	6.45987	7.5412	6.52765	5.28017	1.37799	11.8685	4.22624
PF3D7_0605100.1	6.70004	6.702	6.91651	6.30515	6.10246	5.89378	5.38928	5.57054	5.81977	5.49588	6.82871	7.28533	5.98657	5.88662	5.46393	6.89125	5.51303	6.4072	6.67253	6.53953	7.33837	7.57714	6.59005	6.28823	5.50393	6.04102	7.08244	6.91932	7.16563	6.55758	7.26198	6.10153
PF3D7_0605200.1	6.27539	10.2503	3.91995	5.42151	6.6171	1.42701	4.9847	5.50229	6.06365	5.08064	8.22495	7.59526	6.84372	5.9514	3.09647	7.35158	2.44855	7.37489	6.31272	7.86923	11.3182	9.6174	6.94507	-0.197188	6.37749	4.70683	6.35836	7.05416	10.7511	8.78614	2.84897	6.56027
PF3D7_0605300.1	11.6742	11.4656	11.6425	12.4122	9.85227	13.2281	13.4366	14.133	13.9545	12.5151	7.81689	9.82371	12.4043	12.7413	12.4858	12.4442	15.833	11.3678	10.6104	10.8553	10.9358	13.0193	11.9666	13.5236	11.3225	11.7363	13.0529	12.6055	11.4159	14.1694	10.4883	11.2954
PF3D7_0605400.1	11.6218	11.5632	11.2451	13.7814	12.2171	10.202	13.1576	8.97765	12.2848	12.5561	9.18824	9.26635	13.9134	11.7595	12.4473	10.283	10.1975	11.2298	9.8241	9.43904	11.0473	11.0759	12.3459	11.2476	10.7403	12.2563	13.4772	13.7902	11.0808	8.19606	10.7188	12.4324
PF3D7_0605500.1	5.82865	4.82083	4.89561	6.06596	2.71453	3.77771	6.00831	3.4795	6.66925	6.2043	3.13974	3.90481	5.79189	5.58609	5.35556	3.56892	3.96581	4.7086	3.95243	3.38993	5.57929	6.42094	2.14968	5.51352	4.90989	7.02137	7.76768	6.95807	5.21234	7.40178	4.33017	5.37175
PF3D7_0605600.1	9.7559	9.35393	9.15617	11.5005	10.3619	10.2368	12.1834	9.56521	10.8401	10.2594	10.0027	11.6913	11.221	9.77191	10.8759	11.5906	8.40063	9.0664	8.9577	9.86295	10.5769	10.8234	10.5703	9.69404	9.88777	11.4299	13.3789	9.65539	12.728	9.4509	8.68567	10.6538
PF3D7_0605700.1	4.92152	3.01172	3.36141	4.55783	3.76825	1.27628	5.14115	-0.00375023	5.64032	4.72594	1.60479	7.65064	4.67685	3.52551	4.99555	2.10707	1.87133	3.06719	2.58694	5.50365	2.87106	3.94338	-0.217576	5.6126	4.1659	6.1352	6.19822	1.5379	3.93151	0.91171	1.89473	3.33303
PF3D7_0605800.1	5.38924	5.61295	4.35358	6.17254	7.40981	6.73368	6.8398	5.8082	6.77323	6.8149	4.95683	6.48328	7.01363	7.42686	4.80692	6.07281	5.32655	3.64534	4.36425	4.74579	6.95401	7.16883	4.46525	4.94656	6.78115	6.59316	7.23634	4.506	6.48872	4.54618	4.78857	2.99019
PF3D7_0605900.1	3.46982	3.96077	4.93221	5.7999	5.97959	6.15473	5.22132	4.01508	5.23564	5.35039	5.46849	3.73755	6.12334	3.56808	3.56844	5.08772	3.35906	2.70206	1.31947	3.41875	6.18869	5.34538	4.98984	3.9931	4.47631	5.7295	3.97682	5.35503	7.20185	4.66577	4.05875	5.12726
PF3D7_0606000.1	7.53699	7.40689	7.06119	7.28751	7.56095	7.84576	7.74225	7.33668	8.11343	7.85342	7.40563	8.18494	8.05625	7.8861	7.3524	7.52918	7.0888	7.11022	7.18914	7.44192	7.91967	7.81908	6.92529	7.02151	8.20699	8.03505	7.83165	7.45281	7.95782	6.46804	7.02208	6.84802
PF3D7_0606100.1	7.92567	7.94277	6.79304	8.34073	8.29182	8.47721	8.70443	8.03838	8.50288	8.48758	7.86	9.07434	8.54147	8.97455	7.9712	8.06055	7.80089	7.67352	7.97964	7.94203	8.33517	8.44117	7.82935	7.91431	8.75041	8.1345	7.19235	7.62836	8.2133	7.41667	7.6692	7.18777
PF3D7_0606200.1	4.32325	7.34284	6.47387	3.60474	3.11417	4.77827	3.4782	4.18292	3.58628	3.05458	4.57765	4.10795	3.81636	0.868525	5.04005	4.54828	5.67128	4.62272	4.2397	4.59255	3.13538	5.20494	6.84947	3.90882	5.30825	3.82458	3.64414	5.30384	1.55916	4.92967	7.58529	7.23464
PF3D7_0606300.1	10.2353	8.08316	8.33853	8.54558	7.58373	5.81358	9.37985	10.3097	9.84589	9.50717	10.8443	12.6919	9.72182	9.6243	9.83768	10.9305	6.70654	9.09395	8.06392	8.93149	9.83014	10.4228	9.21342	7.78736	8.69614	8.79564	11.203	9.97291	8.25944	9.19464	7.39836	9.44983
PF3D7_0606400.1	16.862	22.1411	21.327	15.3254	14.4983	11.9343	14.8317	16.8389	15.7933	14.6196	17.8204	9.9462	16.4405	14.8474	14.6517	12.4927	13.5296	16.4653	18.3026	19.5031	17.8787	18.6357	16.2262	14.7249	15.04	13.038	18.1477	17.8212	12.047	19.4611	13.3909	19.2659
PF3D7_0606500.1	5.14721	5.1781	5.97467	5.22698	4.78426	5.60808	4.57294	5.36345	5.06588	5.35811	5.62494	5.38699	5.36137	5.01155	5.17916	5.76786	4.83899	5.78017	5.57171	5.98061	5.59289	5.72056	5.51345	5.15319	5.58209	5.62395	5.3566	5.45675	5.58607	5.25477	6.57515	5.35816
PF3D7_0606600.1	7.00613	6.78857	6.87428	7.09557	7.45345	7.56136	7.82967	7.31342	7.08292	7.88933	6.80791	7.89791	8.51222	7.57534	7.69433	7.29103	7.19997	7.07293	7.55293	7.68476	7.18071	7.11517	6.85222	7.05349	8.0853	7.78952	7.36537	6.84556	7.90978	6.89075	6.7308	7.10651
PF3D7_0606700.1	6.63606	6.84271	5.75368	5.98275	5.75626	6.52358	6.32027	5.73296	6.19448	6.33523	6.63626	6.80627	6.72347	7.64441	6.33133	6.55179	5.62697	6.89261	6.86156	6.77053	6.54418	6.47998	6.74734	6.22611	6.50859	6.53026	6.1143	6.69517	5.42375	5.90797	7.16854	5.55635
PF3D7_0606800.1	3.86311	6.63773	2.13813	3.88143	4.14427	4.44201	3.56387	4.4275	3.84669	3.40109	3.83572	3.00786	4.11385	4.41031	2.80924	4.36489	4.88415	3.59538	4.17912	4.44271	4.71082	4.27922	4.28678	4.42298	3.60372	3.63924	3.40751	3.86633	5.75342	2.88079	3.12986	3.01161
PF3D7_0606900.1	6.95493	7.51081	2.74906	5.9593	5.84028	7.38983	5.99057	7.35317	7.36672	5.73663	6.47245	8.47357	6.36508	5.98981	6.17184	5.99808	7.70725	6.57845	5.55755	7.31369	7.35431	9.28693	6.59067	5.34585	7.64801	5.41664	5.91619	6.57774	8.59041	6.42385	9.01396	5.6637
PF3D7_0607000.1	10.1628	10.6093	9.90903	9.7135	9.90116	9.90086	11.3131	9.89545	11.0069	10.7298	10.0047	10.4548	9.84577	10.7577	10.2559	10.1136	10.6593	10.1848	10.7944	11.1133	10.489	10.9366	10.4754	10.3903	10.3818	10.2329	9.99077	10.2028	10.5534	9.73391	10.4157	9.96032
PF3D7_0607100.1	5.96363	5.57342	6.17121	7.60352	7.5366	2.95131	9.24941	10.1555	9.5578	7.77462	2.40081	5.0843	7.68099	5.3371	8.50993	6.94062	8.27589	5.95504	4.35472	7.92744	4.62319	5.63379	7.40002	6.31593	8.39565	9.1888	2.19623	4.74172	6.29005	2.74686	3.86434	8.43437
PF3D7_0607200.1	11.3328	10.521	10.3124	11.5249	11.013	9.19894	12.2028	8.95174	12.5543	11.2456	7.89901	12.7574	12.3255	10.9259	11.1849	10.8033	14.2956	8.58035	11.1005	8.22268	10.6729	13.451	11.4446	10.1903	10.6689	10.6283	11.4793	9.93373	10.129	13.1074	9.85365	10.5823
PF3D7_0607300.1	11.6229	10.8289	10.6063	13.4652	12.0516	13.8293	13.2812	11.8946	14.0378	13.4013	11.5658	12.7669	13.9345	13.2754	14.4511	12.5648	9.72405	10.8468	10.4461	12.4386	10.7676	11.8716	13.8238	13.1318	11.1784	12.7666	14.3435	11.2738	10.5122	12.6206	11.3573	12.6998
PF3D7_0607400.1	8.82877	10.7351	12.1691	6.3905	6.45474	6.68684	5.96601	5.5971	6.8284	6.1974	9.44585	6.22663	5.81298	5.02184	5.23951	9.19475	10.2748	9.23641	8.42604	9.01459	9.84989	9.11655	8.40933	7.79535	6.69418	7.90044	7.91998	9.09199	10.1939	8.8896	10.6839	8.95654
PF3D7_0607500.1	5.62775	6.3287	6.72213	3.51605	1.72059	1.45894	1.92318	2.56304	3.53005	1.87259	5.96563	3.95924	2.67144	-0.0322518	2.04707	5.3426	3.09162	5.44718	4.32278	4.81262	5.62433	4.6915	4.41851	3.94043	3.02513	2.55557	1.30913	4.43616	5.98276	5.27365	5.5328	6.89903
PF3D7_0607600.1	7.95728	4.59957	11.2874	8.47017	5.8955	5.27001	6.6105	6.85731	7.93593	6.80055	9.11637	4.81911	8.17031	5.6517	8.39641	7.85317	7.19738	8.12545	7.51994	7.89936	6.48293	5.57612	8.13648	7.27413	7.29388	7.2494	5.55507	7.9527	5.85843	8.53248	9.88041	10.4825
PF3D7_0607700.1	14.9591	12.7505	17.9993	15.2591	13.8611	15.2417	16.2682	14.9654	15.377	14.8987	15.207	14.3486	15.6055	11.972	16.0813	15.4031	18.5264	14.725	14.9512	15.7255	13.9976	15.0811	15.673	15.9943	15.4927	15.0426	14.7204	14.8249	16.9029	14.4533	17.073	17.5356
PF3D7_0607900.1	7.23798	6.37374	11.7287	8.26359	8.06694	10.2621	7.54152	8.92825	5.31722	7.04354	6.66347	8.66929	8.27545	7.24081	6.51771	7.82007	10.1105	7.94845	7.54219	7.9095	7.63442	8.65337	8.50644	9.41705	7.26569	7.49443	4.0885	5.94301	6.4357	8.98266	6.10756	7.16397
PF3D7_0608000.1	6.69868	10.9952	13.0308	7.37745	7.03857	9.63415	5.98561	6.43119	4.15343	4.80478	6.09875	6.21361	3.64779	4.93281	4.36274	7.7119	3.47665	8.5828	8.34569	8.46083	7.68289	7.64019	7.27479	8.46814	7.41479	5.77395	6.49244	6.86692	3.51294	5.84608	9.27711	6.5889
PF3D7_0608100.1	6.66857	9.14067	7.02595	8.60125	7.69671	8.17829	7.56077	7.7462	5.35622	7.71019	6.30721	7.67058	6.49867	3.81833	10.3768	6.81476	10.1279	8.85442	8.80127	8.86849	4.48339	6.52354	8.31261	9.23945	8.51969	7.89122	8.51657	6.47168	8.29976	9.08477	10.7741	11.2283
PF3D7_0608300.1	5.48646	9.78121	4.57146	6.76959	5.92787	6.08586	6.53566	3.28156	6.34446	6.18502	4.05087	5.80593	5.81983	4.51684	6.05988	5.01584	8.25604	6.4144	5.51362	5.22949	5.20738	6.64164	8.01158	6.42547	6.22595	5.47471	1.84395	5.56012	4.80781	7.89122	7.00799	7.7787
PF3D7_0608310.1	8.30264	6.27192	7.21397	8.38151	7.53422	9.46909	7.30316	9.11048	6.17295	7.50893	8.83827	10.2581	8.92174	7.80747	8.96668	7.44666	11.0498	8.14165	7.63105	7.90577	6.63245	5.96042	8.54017	7.2126	9.09967	8.28388	2.47462	7.33115	7.19326	11.0165	4.86869	9.5547
PF3D7_0608400.1	11.6517	11.4852	11.8176	15.7555	11.5578	8.37976	14.2696	16.3024	14.0739	13.3779	7.32647	10.3203	12.6771	10.5327	15.2555	12.8584	7.55447	11.913	13.0219	12.5946	9.77088	11.7623	13.67	13.2023	12.1313	12.9573	13.4856	11.3076	11.4043	7.39244	9.35109	15.2459
PF3D7_0608500.1	6.66461	6.30585	7.89598	7.02984	6.53083	6.95037	6.88706	6.69575	7.05519	6.85694	6.71556	5.88866	5.77867	8.16782	5.77833	6.82076	7.45655	7.53006	7.5438	6.90707	7.50523	6.67767	6.8028	6.88813	5.90037	6.78387	6.45081	6.57594	7.19224	6.61253	4.7746	5.72012
PF3D7_0608600.1	12.2895	14.6587	16.8101	11.1708	11.2352	12.5969	12.6528	11.5225	10.8164	10.9226	12.1729	7.64136	10.9162	9.01585	9.4081	12.2655	5.02672	10.7504	11.8859	11.2515	13.3593	12.0047	12.4434	12.3082	11.7563	9.53726	9.50522	12.7921	9.01479	12.1469	14.5044	13.6414
PF3D7_0608700.1	5.87505	6.52647	5.78084	7.05194	6.19815	6.18095	6.60665	6.21165	6.19334	6.62173	6.24538	6.11512	5.89267	6.37149	6.03723	6.66453	5.11406	6.3717	6.13825	5.18323	6.20807	5.70275	6.68466	6.30296	6.1359	5.44466	5.00671	6.28653	5.63826	6.06286	5.56032	6.42782
PF3D7_0608800.1	12.563	8.72892	16.2009	13.9145	16.3257	14.2808	11.6738	14.4686	12.1408	13.4304	12.3492	13.7906	13.3098	10.4254	14.3988	12.2803	14.1794	13.597	13.9908	13.5745	12.4892	13.3152	13.3683	13.5378	13.25	13.2522	14.0369	12.6772	15.5336	13.6799	16.0719	14.7964
PF3D7_0608900.1	7.87426	6.56527	7.34697	7.83933	10.1024	3.74134	7.73319	7.59444	7.91989	7.53895	9.2803	8.57736	7.4756	9.11785	5.99243	6.75583	9.51157	7.75293	6.82912	8.69171	9.90318	10.4549	7.95764	7.06891	7.40329	6.67134	2.68481	8.88576	7.83788	8.53091	10.8519	6.34962
PF3D7_0609000.1	7.09093	6.48767	7.20748	5.81097	6.56452	6.15145	6.71682	6.63345	6.28089	6.3409	6.89192	6.74466	7.0348	6.80634	6.84986	6.53535	6.97812	7.16842	7.29554	7.71346	6.74296	6.7638	6.82251	6.8041	6.49382	6.84113	6.4862	6.70419	6.74717	7.18956	7.3388	6.86871
PF3D7_0609100.1	5.4774	5.59863	6.1087	7.29491	6.18993	6.8212	5.76002	5.07368	5.14557	5.84069	6.89205	4.05284	5.84694	5.78587	3.86483	6.66557	4.41298	5.32048	5.05757	3.91779	7.81779	5.94852	7.08436	5.00079	4.3956	5.08033	4.30465	6.77788	8.28977	6.68764	4.75142	5.96803
PF3D7_0609200.1	6.94706	8.44911	3.56977	2.99034	5.07296	4.95096	2.08378	6.06742	4.69708	3.881	6.19668	4.68868	4.18711	5.24964	2.74539	7.07327	8.10242	7.39864	5.58919	6.02958	7.87573	6.65223	5.11016	4.12049	4.62794	4.37849	5.89364	5.98757	9.43848	7.34636	8.02794	3.62403
PF3D7_0609300.1	12.4343	11.912	16.1037	13.455	11.9078	13.8115	12.1538	9.83827	12.6556	12.549	12.6563	9.82169	12.8688	10.3937	11.9547	10.9578	9.1527	12.3327	12.1083	11.7469	13.6054	14.3002	12.9163	12.2852	12.3369	12.4698	12.6425	14.1734	11.7989	15.0818	17.33	14.5174
PF3D7_0609400.1	9.17691	5.34523	11.7722	9.33018	9.6532	10.1976	9.11448	5.94762	9.3057	9.22914	9.6985	10.4398	10.3987	7.19324	10.9884	8.71926	10.0589	10.2358	9.14735	9.27436	8.44383	8.84429	9.09178	9.4019	8.8815	10.1658	12.0877	9.0368	10.9747	11.4927	12.6402	11.2563
PF3D7_0609700.1	6.66148	7.08552	6.69798	6.76927	7.41371	7.24556	8.45308	7.01216	7.68545	7.89105	6.65305	7.59741	7.87287	7.35052	7.72734	6.73502	7.2688	7.11253	7.5163	7.68741	7.09682	7.43814	6.9974	6.87412	8.2596	7.98467	7.04173	6.85986	7.76106	6.20918	7.04998	7.22391
PF3D7_0609800.1	7.18398	3.71734	3.60639	7.30237	7.66154	7.03311	9.15522	7.2026	8.93207	7.79003	8.51902	8.39752	8.22265	11.9606	8.24916	7.09359	8.86566	7.78448	8.50398	9.06064	8.25797	8.86543	7.9018	7.05053	7.30135	8.19427	8.01872	8.38898	9.67593	6.22612	10.7484	4.38449
PF3D7_0609900.1	1.00252	0.485519	1.03682	2.45474	3.44702	3.42087	3.6582	1.92878	3.01517	3.62454	0.920894	2.91757	3.87373	2.95264	3.12382	1.75715	-1.42069	1.8634	1.01018	1.63786	1.53888	2.10175	1.63965	2.64091	3.18943	3.67649	3.64528	1.046	1.85099	-3.17527	3.11052	0.596304
PF3D7_0610000.1	2.25618	0.124127	0.812481	1.59021	2.03641	3.56832	2.34454	-2.50914	3.40639	2.00471	-1.41097	1.66081	2.13312	1.53691	1.86374	-1.32183	-0.938445	0.340325	1.88863	-1.56243	0.774229	0.472134	-1.65882	1.86455	1.33594	2.41977	3.96077	-1.46317	1.57667	2.31396	-0.782777	0.75411
PF3D7_0610100.1	8.39115	9.28338	7.6814	8.21835	9.07479	9.59721	9.05991	9.06647	9.19002	9.33915	8.03695	8.98411	8.74708	11.0998	7.54726	8.88694	9.90887	8.94277	9.31708	9.63517	9.90865	10.4211	8.24661	8.58495	9.4146	8.78349	8.61506	7.79394	9.24987	8.14776	9.40531	5.70268
PF3D7_0610200.1	8.93274	10.338	9.2409	9.18127	8.81133	8.70671	10.0331	9.37463	9.09144	9.54862	8.40924	8.67649	8.44219	9.54929	9.2559	8.74599	9.67099	9.22054	9.99481	10.0392	8.91569	9.42263	9.29761	8.82013	9.73169	8.57907	9.3207	9.19608	8.15605	8.93111	8.50649	9.10794
PF3D7_0610400.1	13.2991	15.4012	16.7415	14.4034	14.9098	12.8916	14.0722	14.0396	13.3026	13.5419	14.9674	8.00233	12.9546	14.4742	10.4191	14.9694	15.658	14.024	14.0717	12.1617	16.3081	14.3636	13.6924	13.4697	12.7954	12.2046	14.1786	13.9816	15.1198	14.7767	14.9911	12.2482
PF3D7_0610500.1	10.9872	14.9482	14.9211	13.4489	12.5984	13.5643	12.6297	15.1187	12.1666	12.3481	13.4424	8.90768	10.929	8.83562	11.2146	11.7676	15.6708	12.9325	13.1314	12.788	12.7994	11.5246	14.0292	13.4634	12.6213	10.7316	6.45916	12.5122	15.3636	12.8417	8.65363	16.3442
PF3D7_0610600.1	7.19408	2.19157	2.5136	7.75708	5.97755	7.1359	6.71396	7.78648	8.00496	7.78935	7.94503	8.60943	8.10492	8.20929	9.50045	6.71384	5.08858	7.05056	6.77923	7.43547	6.15361	6.16357	6.84623	7.14762	6.14935	7.64061	7.56995	7.1564	9.70088	8.31475	8.07924	7.56293
PF3D7_0610700.1	7.94043	9.62332	13.5767	7.60971	6.28965	8.24601	5.3972	8.55272	6.55866	6.64122	8.91202	9.57492	7.03466	2.49375	6.16789	8.28021	1.21906	8.18238	8.42999	8.25133	9.50819	8.21466	8.55991	8.45189	5.75093	6.68482	6.43414	8.3576	9.26864	8.31607	0.86215	12.5031
PF3D7_0610800.1	6.82382	6.56355	5.9696	7.1992	6.63436	7.16411	6.42952	6.93867	7.03937	7.44173	6.6489	7.256	6.81299	7.08726	7.07234	7.10819	6.27608	6.97694	7.17369	6.39205	6.75767	6.55701	7.0226	7.22762	6.4314	7.08687	6.60947	6.51277	7.51521	6.87835	6.16494	6.90136
PF3D7_0610900.1	7.53988	7.31841	7.55856	7.034	6.98401	7.56146	8.20614	8.02106	7.95977	8.21159	7.1602	8.14276	8.27028	7.52038	8.06594	7.36821	7.14137	7.17581	7.71034	7.7819	7.42026	7.98293	7.38615	7.51895	8.01622	7.80328	8.08335	7.61124	7.50753	6.70018	6.65897	7.74249
PF3D7_0611000.1	17.5378	16.8352	21.711	14.4189	16.7938	15.4297	17.025	15.0233	17.5906	17.4987	17.7282	18.9081	17.964	17.1788	15.1942	17.9022	14.2061	16.7265	17.4231	17.5738	19.4077	18.6702	16.5668	17.247	15.9145	16.4698	17.5558	18.9474	16.1381	16.4738	15.7688	16.4393
PF3D7_0611300.1	7.89231	12.5775	6.59317	6.87283	6.39953	7.81457	7.81223	8.98971	8.8071	7.66497	9.22261	5.23792	8.01523	8.35364	7.27753	7.53568	10.3845	8.24359	6.72603	8.32805	8.49841	10.2251	7.46948	9.06091	8.82303	7.58388	9.03828	9.90867	6.60753	8.13635	12.1294	7.13389
PF3D7_0611400.1	4.19484	5.95159	-0.0825641	3.48779	3.32966	5.20643	2.7092	5.25057	4.33075	4.46715	3.33057	5.78421	4.88602	2.761	5.57951	4.33134	7.17022	4.33896	4.35217	5.04951	2.90934	4.68934	3.6287	4.84446	5.54949	4.40904	5.71707	3.6362	6.98413	3.06967	6.50126	4.29675
PF3D7_0611500.1	14.1863	15.1508	14.4047	13.1115	16.042	14.3826	17.3021	13.3412	16.7492	16.2794	12.726	13.5278	16.8513	14.563	15.3212	14.0153	13.6484	12.5862	15.3345	13.0578	13.8169	13.9355	15.8771	16.5496	14.7655	16.597	10.5993	12.7798	13.9624	11.5494	14.3655	15.2564
PF3D7_0611600.1	11.4629	9.3491	14.3966	11.9139	12.8888	12.7621	14.0453	12.5078	13.352	12.4457	11.8127	10.9717	12.8309	8.85914	12.07	11.2737	13.3811	10.6501	12.7405	12.0631	13.1027	13.306	12.1923	11.7802	12.2485	11.5792	11.601	11.6032	17.3322	13.1783	11.5521	14.7452
PF3D7_0611700.1	8.84064	11.9076	12.566	7.75027	10.4126	10.7636	8.62996	8.47901	9.02564	8.34523	10.8949	9.39135	8.24993	12.8973	4.33001	11.7739	13.2797	12.2062	11.5535	11.2834	14.576	13.0855	9.53624	9.25604	9.20939	7.72256	8.53821	11.315	12.2536	11.3798	11.89	4.55462
PF3D7_0611800.1	7.63432	6.16717	7.76359	7.09738	8.63499	7.87907	7.61339	8.34794	7.33914	7.8639	7.76728	8.96914	7.72785	7.63649	8.57603	7.62059	8.33332	7.87726	8.04054	8.58567	7.08566	7.55588	8.00657	7.95443	7.94195	7.75445	7.29841	7.32902	7.57603	8.00352	9.07546	7.79229
PF3D7_0611900.1	9.94375	16.0052	13.0989	8.84801	8.60908	10.8766	9.33542	6.85892	9.30432	9.80824	10.9669	7.68399	9.67665	10.0694	7.76515	11.1297	12.3494	11.1554	11.2913	12.177	11.1038	10.5047	12.3132	10.9918	10.4726	10.0192	5.38413	10.1894	7.70345	11.2903	12.9562	10.2065
PF3D7_0612000.1	11.5286	16.524	16.072	12.0829	11.3113	12.8946	11.366	7.43655	10.2951	11.6592	12.7396	8.12131	11.7737	11.6789	7.5285	10.3101	14.9767	13.0536	12.8373	13.0601	15.3228	13.691	12.1193	11.1278	10.613	11.2333	12.0716	13.0935	15.3398	10.0705	8.76001	11.0577
PF3D7_0612100.1	7.12983	6.97038	5.83899	6.1423	6.48464	6.74971	6.46338	6.4855	7.41289	7.32893	7.1833	6.49796	6.84468	7.24759	6.97451	6.96742	5.974	7.31224	7.08081	6.03153	6.97285	6.63054	6.96285	7.29331	6.10097	7.16271	7.18867	6.85378	7.30611	6.8764	7.52839	6.74358
PF3D7_0612200.1	14.5951	13.4936	19.3996	14.9635	14.8506	14.6299	15.6319	11.5151	14.2931	14.1444	15.4903	13.6664	14.8161	12.6244	13.5413	15.3478	14.65	12.8046	13.2628	14.0294	14.9451	14.1728	14.7371	14.2995	14.4434	13.7217	14.6987	15.1805	13.3987	14.8778	15.8416	15.5844
PF3D7_0612300.1	2.54038	5.12554	-2.36109	-1.98042	-2.09801	-1.61374	1.40318	-1.20169	2.53926	1.54109	2.88411	4.63134	3.04831	0.766191	2.64141	-2.20784	-0.993613	3.23378	-0.18345	3.05471	0.625883	1.1525	-0.784829	-0.561672	3.8214	1.79994	-0.646555	2.69928	-1.35206	-2.26401	-1.0523	2.87875
PF3D7_0612500.1	10.5747	17.0123	17.0065	15.2459	18.3012	13.9143	17.1074	24.3293	19.9327	19.3992	17.9714	16.4843	19.4357	15.2046	20.6017	17.8673	20.8073	17.9954	18.3678	19.015	13.9998	16.0922	20.5236	18.4625	19.5619	18.3368	11.4483	17.7989	16.1169	12.0624	14.6365	20.7296
PF3D7_0612600.1	7.13408	10.3783	10.4697	7.29884	6.46619	7.62946	5.70616	6.13788	5.32682	5.6094	7.55029	5.89127	5.63595	5.00752	4.85884	8.08758	10.76	8.7392	8.7684	9.31952	8.35546	9.18312	8.46401	7.88118	6.60799	6.45869	7.91294	6.54128	9.78555	4.58337	9.51995	6.82666
PF3D7_0612700.1	4.69071	5.0761	6.83276	5.29273	5.09739	5.30028	4.13388	4.75563	3.70281	4.66488	4.59138	5.46491	4.82459	1.48637	5.31836	4.711	7.82013	4.89466	4.66005	4.65748	4.18716	5.00983	5.22811	4.94274	5.55438	4.57112	4.41908	5.52048	6.03247	5.92943	5.65335	7.38312
PF3D7_0612800.1	7.59793	11.7217	6.151	7.62869	7.68854	8.74361	7.99687	10.0583	8.31643	7.77868	8.54406	7.20893	7.10031	8.52631	4.72467	7.94568	11.8211	8.82215	9.058	9.71282	11.6087	10.4347	8.53685	8.76785	7.76298	8.07948	1.38891	9.19974	14.5822	9.18713	4.71474	7.68534
PF3D7_0612900.1	7.69973	8.15612	8.41802	8.6375	8.18548	8.22326	8.40158	8.19428	8.62133	8.78757	7.65753	8.08318	8.53366	7.58888	8.31571	7.9354	8.44455	7.78591	8.20223	7.76563	7.9317	8.15665	7.91002	8.22453	8.74514	8.03476	7.78952	7.92763	8.29166	7.58356	7.39702	8.59989
PF3D7_0613000.1	6.05235	3.78752	10.1221	2.79994	5.92548	2.51654	7.4841	2.929	7.64088	6.84991	5.63805	3.30634	7.08736	3.31647	6.27626	4.93519	8.60436	5.04128	5.14821	1.85429	5.28913	4.32807	6.86991	1.56353	5.63352	4.72242	7.08587	6.5107	4.11327	6.47436	2.82938	8.72392
PF3D7_0613000.3	-3.24169	-6.08033	-4.68681	-8.23331	-1.62452	-1.34585	-3.20601	-7.60879	-1.73306	-3.66339	-7.70964	-6.75573	-2.32373	-3.22097	-5.01061	-8.65709	3.67026	-3.35169	-3.64739	-7.98188	-4.94064	-7.12615	-4.66249	-5.61237	-4.00526	-8.67274	-7.39355	-2.80844	-3.42808	-6.97418	-6.75437	-5.96178
PF3D7_0613100.1	6.34644	8.77605	8.1904	8.1442	7.10054	7.98134	6.64861	6.81043	7.76163	7.13193	7.53626	9.33198	6.85956	5.78366	7.60983	6.33702	10.9577	8.25747	7.68853	6.72284	6.82208	8.00375	6.91229	8.60568	7.23639	8.25944	7.36479	6.36098	8.48062	8.24062	3.52873	8.75516
PF3D7_0613400.1	16.9465	15.0039	13.8945	18.5385	15.887	15.3422	16.6005	14.8343	14.6448	16.0013	12.9521	15.0177	14.6509	14.1646	14.3494	14.336	22.1768	13.1334	14.6583	13.8033	15.6352	17.2693	17.1988	15.981	14.3365	13.769	12.2125	16.8083	19.3889	12.0253	14.914	15.5102
PF3D7_0613500.1	5.37	9.60675	7.67564	7.72681	7.81102	6.8977	9.67477	5.08174	7.54588	5.36686	7.57318	1.25589	6.15894	6.15464	3.87238	5.82002	7.04149	5.03134	4.96551	5.62938	8.97715	8.14018	8.76267	5.89032	5.61892	6.86792	4.4332	7.43614	8.65477	5.1478	6.11736	6.96775
PF3D7_0613600.1	11.3336	11.1404	10.7682	11.9222	11.6389	10.2773	12.0277	10.4306	10.0801	11.1587	12.4983	14.0816	12.4408	11.4467	11.0563	11.3231	9.81098	10.7981	10.1368	10.9334	11.3636	11.5759	11.5683	12.4658	11.1286	12.1004	8.17111	11.2842	10.5165	8.1789	10.7189	11.0596
PF3D7_0613700.1	8.55694	9.59719	10.1264	10.5125	10.2303	9.98993	9.07498	8.25763	7.87247	8.70008	8.40734	8.02027	8.75433	8.4148	8.47734	9.20071	9.7939	8.90676	8.85909	9.46089	9.60317	9.33914	9.0957	10.2099	8.57889	10.6187	9.40505	10.0027	11.2655	9.5093	10.3756	9.33076
PF3D7_0613800.1	9.38465	11.6751	10.8141	9.21683	9.63167	9.59787	8.86191	9.573	8.24665	7.98855	8.29886	8.31435	9.75815	9.21429	8.28617	9.98098	10.1114	8.62815	9.49137	9.79384	9.59555	9.83145	10.2559	9.38396	8.72133	8.98096	9.59536	9.26284	8.13519	10.2452	8.17782	8.97883
PF3D7_0613900.1	3.61034	5.75592	7.04933	4.98707	4.75772	3.19399	5.22416	5.27202	3.10621	3.94518	4.47749	1.09791	4.74778	2.45514	3.84704	4.25276	6.22396	2.68477	3.23106	3.18863	3.4802	4.48646	4.30535	5.28807	3.7574	2.68359	6.74146	4.25849	2.62609	2.63961	4.00451	4.91029
PF3D7_0614000.1	8.96649	7.45519	7.42522	8.70375	10.0631	9.56734	9.58222	6.58419	8.71843	9.33736	8.93255	7.16902	9.52009	8.41838	8.16553	10.1018	11.4199	8.76554	9.52158	5.47925	9.58178	8.93772	9.79352	7.60369	7.79124	7.46948	11.5912	6.73326	13.1451	9.71501	11.8374	7.94433
PF3D7_0614100.1	7.8874	5.65461	10.7782	6.33409	7.82153	7.23122	8.20031	7.78051	7.29308	7.08179	7.46078	9.32965	7.72063	6.64128	7.28206	8.71099	5.4852	8.62924	8.33355	9.38104	9.26549	9.56846	7.45469	7.67654	7.09257	7.68138	9.98573	8.57593	9.79323	8.66306	9.44802	7.9432
PF3D7_0614200.1	7.60536	3.16808	9.56751	5.18302	6.46915	6.7672	5.89309	6.6953	5.10375	5.18938	6.51163	8.07934	5.05656	5.43928	3.73799	7.59622	6.248	7.21444	6.94587	6.20208	9.56006	9.482	5.06641	5.41319	5.87833	5.40093	7.34337	7.10018	10.2769	8.43501	9.52333	4.72969
PF3D7_0614300.1	11.2072	12.028	11.627	10.3793	10.1371	10.9359	9.24324	8.93519	7.33993	9.38452	11.6947	10.0785	10.0083	11.0926	9.40377	11.118	10.9409	11.5102	11.7823	11.0675	11.0357	10.0862	11.8031	11.9861	8.28946	10.885	10.1249	11.5206	10.9073	11.1169	11.448	10.2304
PF3D7_0614400.1	9.10461	9.03643	9.53845	7.82663	7.36643	7.22152	8.24603	8.08627	8.22056	7.75559	9.08602	5.78084	7.40377	8.3409	6.82452	8.29519	8.78572	8.60642	8.56337	8.51158	9.57391	8.68166	8.47349	8.34852	6.96386	7.41305	7.76738	9.39539	9.20487	8.99031	8.5366	8.38539
PF3D7_0614500.1	8.6462	8.06688	9.12364	9.09251	8.69085	8.1731	8.87087	8.26918	9.05168	8.63485	8.32631	8.29674	8.04643	8.59729	8.37166	8.57672	8.25078	8.36281	8.49022	8.26364	8.57302	8.4363	8.84771	8.67934	8.1216	7.67974	8.00387	8.71422	7.96311	8.47174	8.29075	8.65453
PF3D7_0614600.1	9.95608	8.78093	8.48925	10.9924	6.54412	8.07258	8.96287	7.69963	9.62577	7.9387	10.3192	8.11313	10.3867	9.44923	8.60057	7.56068	8.01286	9.36715	9.61645	7.31607	9.56614	9.3873	8.45895	9.30057	8.9058	8.29357	6.02608	9.9144	8.46658	9.67643	8.53162	9.9951
PF3D7_0614700.1	10.5755	10.6396	10.2488	8.7534	8.20392	9.77917	9.84198	9.04274	9.03081	10.495	12.145	9.34468	10.6197	10.7585	10.8122	9.48818	9.48073	9.24063	11.4954	11.529	10.2553	9.65256	10.1992	9.15626	10.1574	12.0563	11.5054	12.0612	10.1469	11.2011	10.04	11.1905
PF3D7_0614800.1	12.6745	12.7652	12.7475	11.2637	14.5168	17.8015	14.0012	16.9973	14.859	14.4411	15.2617	19.0877	15.0508	15.4475	17.3529	14.871	17.1511	14.7094	15.0365	16.5644	11.9861	13.2464	14.6342	15.1252	15.3355	12.82	16.9207	14.5734	12.5127	17.5028	12.8506	14.1669
PF3D7_0614900.1	10.5467	8.99577	9.02738	10.0678	7.92624	9.98186	8.48812	10.3759	9.35748	8.91042	10.2205	10.218	9.67283	10.1316	9.73415	8.9144	7.61246	9.58278	9.86723	11.494	9.81879	10.0187	9.41746	9.01993	9.15755	7.89011	9.98238	9.95947	8.94297	10.9724	8.43202	9.76493
PF3D7_0615000.1	6.32102	9.42027	10.5253	6.02921	5.65625	6.04444	6.19976	6.40737	6.52698	5.61345	6.20995	6.28945	5.08641	4.98108	5.01669	5.85764	9.98179	6.9805	6.43401	7.81666	6.63468	8.73129	5.32387	7.34733	8.00493	4.61402	5.96965	6.7148	3.2536	6.7658	8.19495	6.11525
PF3D7_0615100.1	7.55871	6.37796	6.77461	7.73617	7.19749	7.94926	7.54034	9.21267	8.89821	7.83821	6.96424	8.32127	7.62518	7.35565	8.30573	8.19503	10.0852	6.8293	7.10725	7.65316	5.98634	7.31213	8.39995	6.49143	8.22091	7.02207	8.64204	3.77179	7.03024	3.35619	5.18471	6.44392
PF3D7_0615200.1	9.24153	12.3266	11.978	14.0854	9.3215	10.8847	13.4486	14.3276	14.0556	13.3169	10.0112	9.77053	14.006	11.9454	13.4164	14.7222	10.5185	12.593	11.2525	13.3202	10.4411	11.9266	11.8223	14.0829	12.6347	13.1486	14.7702	9.97001	11.8363	8.83969	11.1253	12.0475
PF3D7_0615300.1	10.0183	8.99274	9.00003	8.77364	8.87757	7.22702	10.1768	6.46026	10.9879	9.71356	8.97186	13.6126	10.8339	9.6704	10.3672	10.3889	12.3971	9.50112	9.80453	6.64813	9.27002	10.5607	9.03373	8.12443	10.0228	11.1713	10.8729	8.07768	8.96966	12.2675	8.13717	9.59962
PF3D7_0615400.1	7.98051	8.2663	8.75432	8.04366	8.44191	9.27302	9.35088	9.6205	9.39197	8.79201	7.60455	8.01012	8.75937	9.03005	8.70542	8.26112	9.27568	8.82414	8.8143	9.42509	8.31512	8.51119	8.01937	8.04487	9.97167	8.75452	8.26601	7.78108	8.30066	7.6859	8.00172	7.88508
PF3D7_0615500.1	10.0105	15.352	8.46652	10.625	10.0371	6.37641	9.47194	8.3721	9.09814	8.57844	11.7731	10.4306	9.45376	9.49582	8.26541	7.64696	11.1543	9.36573	9.86856	10.8441	11.205	12.3617	9.48469	9.07241	9.39349	7.5276	9.31708	10.2597	9.01656	11.0813	7.0824	10.4217
PF3D7_0615600.1	6.15336	5.2912	6.17331	5.16325	5.0633	4.40504	4.90512	5.91724	4.24293	5.53345	5.81582	5.06665	5.97142	6.18097	4.98236	5.9816	5.28612	6.47069	6.14597	6.11338	6.17464	5.71736	5.70686	5.73129	4.39049	5.15988	5.45705	5.60218	5.94516	6.33247	5.40644	5.22966
PF3D7_0615700.1	9.1923	6.95556	7.83015	9.80552	8.28097	7.64737	8.08203	10.5509	8.60916	9.33275	8.62843	8.53087	8.27008	7.76481	11.2236	7.11695	11.932	9.55989	9.3018	9.64819	6.83667	8.99844	10.2489	8.88545	8.75774	7.75766	6.93634	9.10185	7.8203	11.7634	11.0091	11.4324
PF3D7_0615800.1	6.09413	3.04224	7.06144	5.09579	7.02687	6.09428	4.21353	2.59415	5.198	5.59384	5.25188	8.0007	4.50835	4.04601	3.58383	5.36236	3.21183	3.54966	3.90684	6.54579	6.8965	6.16653	5.39328	5.92751	4.15142	5.52934	1.90602	5.70823	7.24039	4.22454	7.07708	4.79206
PF3D7_0615900.1	11.3537	13.0577	13.2047	11.3699	12.8872	13.2209	10.0796	10.94	9.14703	11.2165	11.4608	11.6533	11.6118	10.8362	8.6242	10.8979	11.4139	8.83199	8.87885	11.2484	12.3389	11.24	11.0826	10.4375	10.7967	10.9503	10.5066	10.7402	10.8196	8.08041	5.95757	9.62663
PF3D7_0616000.1	11.1314	13.2206	8.0621	13.9304	12.6144	13.527	12.3338	8.92184	12.7598	12.5571	11.4682	9.80072	11.7271	9.54308	10.8041	11.3506	4.51824	8.76964	8.23747	9.28033	12.2672	9.07456	11.5079	10.2964	10.5516	11.657	11.7528	10.4564	15.022	9.50424	6.94512	13.2933
PF3D7_0616100.1	9.70497	4.62511	14.9103	8.38733	9.30856	3.31891	8.64165	11.4465	7.35406	7.91213	9.55448	9.28605	6.18341	8.88549	9.02203	8.89706	9.90867	10.9531	10.629	11.602	9.12599	11.3005	8.41316	8.94514	7.85907	8.94655	10.2831	8.83297	6.25454	10.4724	12.699	8.6984
PF3D7_0616200.1	11.2523	15.9664	9.80604	12.4263	13.0624	15.9751	13.7704	10.9272	13.7104	13.0967	11.9666	11.9086	12.4195	13.2704	14.6631	11.4873	14.2769	10.6289	11.278	13.2427	9.92464	11.1253	14.4695	14.0182	11.8652	13.2812	14.6851	11.442	9.86177	14.0139	10.7239	13.2219
PF3D7_0616300.1	5.75378	-0.0838404	8.74814	4.04512	4.36328	5.89365	4.38518	5.12456	4.90863	5.11302	5.17109	6.45902	3.91911	7.82445	4.06565	5.67084	8.16245	4.87057	4.5206	5.49927	5.20312	6.5705	5.01048	3.58602	5.44223	3.80347	5.11251	5.32186	0.573442	5.3555	8.29876	1.02006
PF3D7_0616400.1	3.11368	2.15832	-1.9418	3.51992	3.05682	3.1016	3.07506	3.75859	2.62173	3.17178	2.74792	3.69267	4.01728	2.26077	5.9456	2.04171	2.14067	2.88103	1.85905	1.91789	0.177298	1.04597	3.15685	3.09833	3.52028	3.26213	3.09177	1.63959	2.32777	2.95464	4.50924	4.41354
PF3D7_0616500.1	11.317	14.1601	14.5971	13.7082	13.6796	13.3111	14.6017	8.8516	13.2963	13.363	11.505	11.7684	14.2479	11.3863	11.4948	12.6601	8.84662	11.2341	12.233	12.6765	13.6713	12.376	12.1702	12.3926	12.7512	13.1123	14.2208	11.127	14.3631	9.75295	9.64203	13.0169
PF3D7_0616600.1	12.8882	11.9604	11.8557	13.0898	12.5366	13.9169	12.5944	15.1261	12.4997	11.6017	11.3929	11.6757	11.8759	13.0957	11.9298	14.4013	10.1078	11.0629	11.9921	12.6788	12.1587	10.3569	12.9588	13.0515	12.7854	12.3576	8.51291	12.2192	11.518	12.0476	11.4717	11.9222
PF3D7_0616700.1	6.31828	4.17793	4.77499	6.67713	5.23496	4.98507	4.82301	7.63514	4.85808	5.30843	6.08585	7.65508	5.93366	4.71777	6.17587	5.11259	1.6868	5.08264	4.60544	5.96638	4.93438	3.71836	2.93469	7.02082	6.21541	5.58004	2.16248	5.31802	4.89858	6.68531	3.1153	6.97216
PF3D7_0616800.1	8.96918	12.1799	10.435	5.52459	10.2268	10.2221	7.10952	10.342	8.0967	8.03587	9.85467	6.37504	8.43014	5.29708	8.76809	9.57232	4.61237	9.08376	9.68043	9.58699	9.192	7.45153	10.2154	9.95879	8.61031	10.0194	8.07376	9.94842	10.1483	8.62346	12.2912	11.7882
PF3D7_0616900.1	4.96491	7.02577	7.28692	5.70886	5.93714	5.49334	5.69313	6.06125	6.17926	6.09602	5.18338	5.0657	5.67998	1.50348	6.93174	4.65674	7.13455	6.30762	5.80741	6.38484	4.90592	6.18356	5.6924	5.53627	7.10202	5.98483	6.159	4.92982	7.33623	6.91729	6.41302	9.4308
PF3D7_0617000.1	5.6655	6.55752	4.83891	6.48171	5.86918	6.47446	5.95554	6.22645	5.52958	6.53032	5.6538	6.72649	5.94968	6.00682	8.78047	5.78371	6.57048	6.84848	7.33998	7.48204	3.91489	5.17339	7.60638	7.46007	5.97391	7.4384	7.0519	6.37554	5.11934	6.72598	7.64237	7.8218
PF3D7_0617100.1	5.97624	4.35321	6.55915	5.67093	5.98662	5.46459	5.73355	5.34864	5.65445	6.15636	5.67916	6.41113	6.26521	5.86149	5.2613	5.72098	5.09687	5.41641	5.49303	5.6246	6.28809	5.92072	5.34221	5.56275	5.66049	5.79845	4.72456	5.64531	6.0446	5.34036	5.29426	5.3733
PF3D7_0617200.1	11.0763	12.1027	11.6188	10.8857	10.8238	10.4472	11.9651	10.307	11.2745	11.206	10.5662	11.1055	10.3884	11.605	10.6469	10.826	11.5059	11.155	12.2482	12.029	11.5295	11.6967	11.511	11.3325	10.742	10.3525	10.773	11.7352	11.0189	10.7907	10.3069	10.9572
PF3D7_0617300.1	11.8783	11.5417	11.1959	11.5372	15.0865	10.8964	17.1145	12.6197	16.6911	16.1544	14.5793	13.3263	16.8164	12.3604	18.5945	11.787	9.99268	12.779	13.4809	15.1723	12.1001	11.469	14.1771	14.4021	12.6086	17.4469	15.8196	14.155	17.0589	16.2057	11.5298	19.3137
PF3D7_0617400.1	1.82531	5.44116	0.641399	5.29723	3.61247	3.94175	6.28671	5.90235	3.08258	3.93531	2.71529	2.82891	3.60142	4.6147	7.31653	0.843666	3.13268	5.35522	6.00474	6.95293	1.57838	2.41904	4.45532	5.02006	4.05191	5.19967	4.7656	4.88557	4.41575	5.12821	-0.179711	6.93359
PF3D7_0617800.1	13.7123	16.7599	13.7902	13.4157	12.1721	13.7888	14.3598	11.3099	11.9878	11.4272	14.7299	11.6768	12.4265	14.1236	9.88809	14.5121	14.4195	14.1298	14.3929	13.9455	16.074	13.788	13.6935	13.5766	12.5952	11.0143	10.5184	14.9046	15.7466	14.5193	13.2407	12.3609
PF3D7_0617900.1	7.99126	9.2444	9.3875	8.186	8.13242	7.84285	9.06466	8.07622	8.56623	8.26157	8.81632	8.10335	8.27648	8.1028	7.4657	8.41859	8.81405	8.47271	8.38158	8.54758	9.29835	9.18421	8.65578	8.55727	8.53651	7.32565	6.2811	9.73425	8.30311	9.15879	8.61641	8.82756
PF3D7_0618000.1	0.660163	1.43204	-2.90137	-2.42494	-0.14276	-0.716755	0.477797	-0.978904	-0.442929	-0.578094	0.290086	-0.610257	-0.284323	2.4175	-1.98204	-2.50939	-3.63212	-0.385766	-1.35174	-0.216235	2.2087	2.02675	-1.54705	-4.41775	0.756718	0.236337	0.082248	-0.403975	-1.64494	1.72388	-0.518175	-2.82655
PF3D7_0618100.1	4.87557	3.08069	3.3351	3.76975	5.47701	4.68763	5.44675	5.9981	4.56245	4.65192	1.47051	5.17564	5.17996	4.05688	5.06776	2.12406	7.31173	5.42556	4.95351	6.45965	5.29493	7.14341	4.4852	3.32893	3.99878	4.08406	6.8438	4.91447	9.30878	5.08201	2.47309	4.71506
PF3D7_0618200.1	6.90271	8.9413	9.9232	5.83862	6.36035	6.05506	5.87614	6.08408	5.66669	5.08266	7.30636	4.34058	4.58637	2.29744	3.48846	6.22937	8.26411	7.47172	6.6669	7.31304	9.09857	8.69161	6.98858	5.70838	6.25709	4.14605	3.53533	7.06126	10.2759	8.62682	8.26893	8.7121
PF3D7_0618300.1	8.45022	8.52585	8.46279	7.97919	8.21624	8.00285	8.37257	8.02068	8.52252	7.92487	8.66215	7.37485	7.80824	8.50389	7.50823	7.92653	8.0686	8.53349	7.9203	7.81633	8.86625	8.57953	8.79392	8.15805	7.45589	7.19796	7.44865	9.05714	7.95531	8.25652	8.3591	8.10211
PF3D7_0618500.1	12.0931	19.2976	11.3323	15.1829	13.0023	11.0229	13.5525	10.7619	13.793	13.7695	13.6217	15.0169	10.1626	12.5415	11.5204	14.2307	16.6047	11.762	13.6085	13.1531	13.0097	13.7658	14.4102	14.2017	13.5974	9.34454	8.66008	13.0275	10.9911	12.7817	11.6646	13.3282
PF3D7_0618600.1	7.33856	11.7106	11.6987	10.4194	12.6862	10.014	10.8248	11.4241	12.8082	12.3369	8.17741	12.1377	13.5099	12.5644	11.4421	12.6683	17.062	14.4469	13.8837	8.36258	10.7052	11.5845	12.8196	12.1536	12.5115	12.1129	8.66472	13.3578	11.4288	8.27507	11.0065	9.93273
PF3D7_0618700.1	11.2677	8.48151	16.2207	12.82	10.7679	11.8558	12.4235	7.52151	10.3336	11.1887	11.0647	7.96897	10.3465	16.0674	10.3381	11.6669	14.6613	13.883	14.4434	13.315	11.6042	10.6383	12.045	12.1608	10.6875	10.0271	11.166	12.528	7.89634	13.6278	16.6719	8.28801
PF3D7_0618800.1	7.22008	10.373	5.64041	6.53567	6.62717	7.54622	6.63208	4.18442	4.85404	5.51505	6.05979	9.05514	4.25735	4.54493	5.63575	5.89971	6.804	5.91755	5.56576	6.23062	6.14476	5.55294	5.21353	7.15873	6.44382	5.57433	5.89659	6.30262	6.36351	7.94552	3.53203	7.37246
PF3D7_0618900.1	17.4719	20.5811	20.1518	15.5521	16.4501	14.6192	16.4784	16.8517	14.9635	15.4244	15.5972	13.4823	13.3658	15.3198	13.5092	14.5744	19.135	17.2519	16.4709	18.4827	17.6643	18.0475	16.5087	16.0204	15.3747	12.2807	15.7033	17.5187	14.5532	15.8014	14.4693	16.171
PF3D7_0619000.1	9.06617	13.3574	5.9708	7.13753	7.58219	8.09796	8.18213	8.25368	6.53769	7.35716	8.23775	3.40483	7.95727	6.17162	5.97036	7.75849	9.10182	9.2113	8.26816	9.21662	10.0985	9.3755	8.45777	8.64293	7.61279	6.65793	6.75294	8.57967	13.0865	8.94623	12.0405	8.97402
PF3D7_0619000.2	8.25642	10.1592	9.82773	9.80635	9.08608	8.92811	10.2011	9.40024	8.10485	8.43746	8.48246	9.4838	8.52131	10.1085	11.1875	8.63103	10.2438	9.34023	10.1005	10.3953	6.20456	7.85725	10.1965	9.87832	10.25	8.33179	9.19626	9.28384	2.7775	9.55592	10.0453	9.5058
PF3D7_0619100.1	7.72318	3.21392	3.56139	6.52897	6.82712	5.48472	5.85084	7.39707	5.64089	5.2557	6.88626	5.58732	5.66981	10.6581	4.09395	7.01021	1.72153	8.15594	7.64072	7.36429	9.86926	7.22379	6.15889	3.69934	4.48344	4.23053	6.55306	7.23809	9.62833	8.02171	7.22141	2.78206
PF3D7_0619200.1	7.24987	6.16911	7.85593	7.0175	7.46399	7.40196	7.02877	7.19338	6.99052	8.35062	7.13801	7.63053	7.4821	7.6763	7.29633	7.44464	7.70565	7.96715	7.99742	8.10396	7.54029	7.58516	7.49949	7.42251	7.29122	6.8809	7.02944	7.14211	7.94766	7.0427	8.42823	6.86335
PF3D7_0619300.1	7.63215	7.42166	8.16327	6.91887	6.63772	8.13315	6.80321	6.92217	7.04259	6.63886	6.75971	8.40259	5.90601	4.39465	7.09204	7.45438	2.80753	6.95634	6.71522	7.56388	7.25155	6.81302	7.64163	6.71112	6.7516	6.37103	6.57568	6.41852	7.42077	8.09858	5.95564	9.32057
PF3D7_0619400.1	10.3566	12.3785	13.1078	10.3214	10.1449	10.9608	10.2194	11.3038	7.14637	8.98807	10.3642	5.59883	8.69714	6.92684	9.94817	10.0997	10.1719	10.6355	11.044	10.1149	9.68312	9.21267	11.3021	11.3682	8.8658	10.5084	12.0228	10.4529	11.6589	10.4294	11.584	12.9014
PF3D7_0619500.1	9.5713	10.3642	10.889	8.01576	8.6938	7.92642	8.08795	3.7089	7.27047	8.12713	9.31217	9.24237	7.94082	8.74127	8.22944	9.25336	8.94313	9.79258	10.1062	9.23332	8.86488	7.72412	9.57438	9.42133	7.22229	9.4888	9.21616	9.59079	7.91253	9.8862	10.7972	9.14574
PF3D7_0619600.1	9.30632	7.83743	7.82379	7.48118	8.69391	11.6238	9.47872	8.8499	8.88254	9.70968	10.4714	9.75136	9.88346	10.6281	11.8748	9.65601	13.7741	11.843	12.2322	11.9773	8.28808	8.42713	10.8896	11.6088	8.00062	10.4168	12.1069	9.93564	13.339	11.9411	12.6435	10.0789
PF3D7_0619700.1	12.0419	11.4562	11.1614	10.2703	12.8005	14.0327	11.4603	11.1457	12.6981	12.9468	12.7056	11.7684	12.1574	12.215	11.4732	12.8364	17.3621	12.9178	13.7608	13.3157	12.8966	12.0108	12.7014	13.1453	12.4545	12.3759	8.79328	11.266	16.9018	13.4922	16.2514	11.4476
PF3D7_0619800.1	6.83149	7.50134	7.32503	7.19415	8.02836	6.51737	6.49067	6.50541	6.29608	7.2624	6.46167	7.12529	7.08683	6.59692	8.27536	6.27557	8.05483	8.29531	7.30123	7.89293	5.96111	6.24689	7.61777	7.21863	6.53217	7.66831	7.91602	6.46538	6.58436	8.55022	6.59896	8.33106
PF3D7_0619900.1	6.48284	9.74808	4.23985	9.65036	6.26963	8.54397	6.90204	10.9395	8.11946	8.34078	6.95734	3.25657	8.42113	10.1307	8.01048	6.79114	1.61569	6.09733	6.53463	7.14915	6.28122	5.55774	7.79854	7.0243	7.62678	8.52877	9.1017	6.95109	4.19642	1.3364	2.42421	6.06609
PF3D7_0620000.1	8.7902	8.19675	8.15068	6.83035	8.57285	6.99813	10.4315	7.39558	7.11498	8.43728	9.97442	7.9099	9.0956	8.786	8.45029	6.04463	6.71513	8.032	6.2399	9.22668	8.30317	7.35921	4.75602	8.62558	8.95055	9.84442	10.603	8.99556	8.16036	5.57265	7.62406	7.62857
PF3D7_0620200.1	5.46799	3.55995	4.04551	5.57393	5.45113	1.82358	5.12602	7.41522	5.92188	4.37807	1.08218	3.51109	5.11614	5.09177	4.16936	4.35103	7.83268	4.5994	3.3717	1.23974	4.565	5.78528	1.97626	5.59795	3.67702	1.21388	7.63882	6.19723	4.38564	5.5422	3.02896	3.03463
PF3D7_0620300.1	6.56596	4.38296	4.41521	5.85607	4.68439	3.58615	5.54335	3.65333	5.05308	4.18161	5.15155	4.1262	3.27695	5.20369	4.71661	4.90133	3.74102	5.67304	3.59012	5.50398	5.94466	6.13703	5.66425	2.22325	4.74059	4.20517	6.7157	5.98196	4.68614	6.65909	8.57661	4.93492
PF3D7_0620500.1	6.90161	5.69784	7.1297	7.50621	7.07946	7.01749	7.7607	7.13377	5.63852	7.71253	6.27353	7.07305	7.76247	7.66733	6.84196	7.11697	6.51923	6.59637	6.76803	7.09344	6.92272	6.81587	6.4792	6.25588	7.64124	6.8401	6.82211	6.25167	6.59758	6.48371	6.68183	6.05764
PF3D7_0620600.1	4.6819	6.11138	5.30365	3.02183	3.3337	2.46739	2.75289	1.75482	2.76977	3.0294	4.06927	3.44008	2.47409	-0.843088	1.37922	3.60119	4.71246	3.18706	2.07825	2.43825	4.80092	4.33528	1.59303	2.59526	4.48319	2.6476	3.67737	3.14177	6.22219	2.24856	4.47872	4.6928
PF3D7_0620700.1	16.5412	16.435	16.1754	19.5935	15.4101	14.5589	17.9103	15.1658	17.6552	17.2699	16.893	15.5181	16.5364	15.6758	15.8279	16.3363	12.5545	14.2753	15.7336	16.0669	17.0318	16.0217	16.9844	16.7125	16.2288	14.8367	11.34	16.9619	15.9777	15.9029	14.6073	18.561
PF3D7_0621000.1	10.3427	12.3181	15.2425	9.6831	9.35085	9.64282	8.09191	5.80067	8.02477	8.63608	10.4252	6.49588	8.34278	7.64883	8.12367	9.99258	10.5752	10.3674	10.6402	10.6675	10.1238	9.5685	10.7944	10.2757	8.29113	9.31039	10.2663	9.50948	8.05046	12.5895	13.2551	11.121
PF3D7_0621100.1	9.86076	13.0713	12.3347	8.76862	10.7665	11.9153	9.69716	10.5484	9.97739	9.40181	10.5213	10.3783	9.79724	9.8581	9.37755	10.3175	7.59706	9.66834	10.2052	10.2992	10.8556	10.8481	10.7514	10.6674	9.71471	11.2406	11.4186	10.1585	8.31048	10.4827	8.21626	10.2085
PF3D7_0621200.1	10.5478	10.4014	11.017	9.67194	10.925	11.0447	9.61829	10.507	8.63153	9.73408	10.294	10.0605	9.76514	10.5872	9.43474	10.6111	8.86002	10.08	10.4267	9.65017	10.6356	10.3127	10.342	10.7061	9.55914	10.6611	10.4957	10.4238	9.56028	10.2135	11.4315	9.21797
PF3D7_0621300.1	6.85686	6.34528	6.64148	5.90658	6.20334	6.31575	5.91042	6.45115	6.56422	6.9856	6.54681	7.24096	6.80063	5.98519	7.33121	6.3971	7.24723	7.00377	6.79269	6.99076	5.97816	6.56229	6.53619	6.93304	6.48782	6.97051	7.11805	6.16919	6.6214	6.8327	7.18361	7.14787
PF3D7_0621400.1	12.7831	15.0878	12.8785	13.7054	13.4577	14.3236	14.4262	14.5353	14.0564	14.4894	12.8819	15.0697	14.8247	14.9703	14.7827	13.6835	12.1092	11.1769	12.8464	12.8941	11.8111	11.7873	14.2025	13.4678	14.2102	14.076	12.5392	12.8088	8.62397	13.355	6.85807	13.8401
PF3D7_0621500.1	7.17003	5.49581	6.21765	8.7732	7.19285	8.43308	6.28721	3.27209	6.65896	5.78444	6.43795	10.4183	7.46799	7.56404	7.36309	6.47094	3.46767	7.91038	6.96275	7.73615	6.80471	8.05948	7.90773	7.01501	6.61078	6.60612	9.02903	7.50255	6.34486	2.32636	10.3108	5.37252
PF3D7_0621700.1	9.26583	5.69764	13.5128	7.72842	8.46233	7.66079	6.83862	7.55018	6.95516	6.76049	9.70741	8.39084	6.63338	7.53463	5.59762	9.12135	8.82906	9.71404	9.59516	9.8989	10.9756	10.6997	8.05594	7.74706	7.08005	7.22758	8.11784	7.76963	10.2892	10.3943	11.7421	7.21808
PF3D7_0621800.1	8.0757	8.28463	10.8261	9.4841	9.43344	9.21016	9.29986	8.51688	9.23978	9.05932	8.90943	8.77714	8.9549	9.67653	8.05255	9.45294	9.27684	9.31177	9.47724	9.25575	9.80988	9.62475	9.30419	8.78755	9.23115	8.62272	8.06939	9.10739	8.76899	8.88469	9.24085	8.12835
PF3D7_0621900.1	6.76074	7.08853	7.24691	6.96514	6.5956	6.53008	6.65384	6.90109	6.97109	7.05385	6.93174	7.06671	6.83656	6.19796	6.774	6.91547	6.7497	7.28169	7.32836	6.58739	7.07863	7.28796	6.75735	6.82304	7.12357	6.44532	7.01437	7.01158	7.33246	6.46375	7.06945	7.27623
PF3D7_0622000.1	8.1059	14.0699	6.40928	8.0342	7.67105	3.90574	8.00637	9.10678	8.90991	7.76148	8.53812	4.58388	7.20063	8.67952	6.56139	8.2734	11.5909	7.59643	8.55038	7.60134	8.50447	8.01437	9.27023	8.80888	7.35942	7.3306	2.6561	8.44868	6.52308	9.88121	5.83477	8.95763
PF3D7_0622100.1	7.75498	7.29496	8.44281	7.22856	7.30519	6.56212	7.65386	7.18726	6.54792	7.28333	7.24065	7.47814	7.51879	7.88499	7.72645	7.36688	7.85938	7.81444	8.40772	8.18215	7.20247	7.45309	7.38132	7.4214	7.49177	7.79057	8.24754	7.66404	6.63705	7.44234	7.9564	7.32135
PF3D7_0622200.1	8.59996	9.62162	9.44563	8.58107	8.26103	7.9802	9.19017	8.53199	8.3438	8.50239	8.71906	8.08228	8.63534	9.51172	8.57195	8.82376	10.1073	10.0956	10.3761	9.91974	9.16263	9.53736	9.0759	9.08384	8.73783	8.5631	9.14185	9.18228	9.01968	9.33256	9.92618	8.51236
PF3D7_0622300.1	7.38445	4.47677	9.29047	7.739	6.7809	8.55673	6.8855	8.62813	4.88109	6.82252	8.35077	6.55564	5.78072	11.4472	6.54182	6.71139	9.09173	7.26439	8.81897	7.61477	7.47753	7.2768	7.6406	6.51932	5.48384	7.24903	9.37144	7.48847	4.77569	8.97525	3.96388	4.342
PF3D7_0622400.1	1.97088	7.70632	0.99294	-1.10683	2.12957	-0.786335	1.58237	-0.24335	1.33325	1.43214	3.58029	0.569	3.90253	3.18199	0.503004	2.935	0.380461	2.00561	3.16218	3.31701	4.33696	2.94605	6.26749	-0.127921	-0.0807671	1.47764	-0.555092	4.02872	1.47547	4.96999	0.769234	3.18681
PF3D7_0622500.1	6.8035	9.80018	9.26465	10.1177	6.85815	9.69438	7.4112	5.06626	5.89325	6.66482	7.8192	5.8038	6.28862	5.44293	10.2198	7.99182	8.11471	8.43361	8.85275	8.45423	4.15334	4.43148	10.3286	8.64476	7.80123	7.37594	10.0178	8.14688	4.41324	8.0079	10.5351	11.0907
PF3D7_0622600.1	4.52578	7.38981	7.52537	4.8847	8.99948	5.68936	8.11575	5.29337	5.20252	7.51928	10.7164	13.9428	9.45763	8.22248	8.30854	5.48746	13.1377	9.66276	9.33921	9.72322	7.14751	9.09494	9.14118	8.72677	7.74131	7.49703	3.63372	9.6457	7.68326	4.58284	6.54868	7.5767
PF3D7_0622700.1	8.48694	10.8006	10.9039	7.54092	6.10269	4.23622	7.15876	3.30449	6.65435	6.60753	8.009	8.15254	7.25559	6.06078	5.76031	10.2584	12.2125	9.57693	9.70269	8.5878	9.48095	9.73611	8.00846	8.18093	6.73897	5.37516	9.69018	9.79095	9.89415	10.2099	11.6939	8.26361
PF3D7_0622800.1	8.76136	9.07558	7.82735	8.60578	8.078	8.16387	8.84999	7.84172	8.02603	7.96087	8.63024	8.42896	8.41344	8.54719	8.82228	8.76787	8.56429	9.03936	9.51561	8.81336	8.23374	8.05639	9.40168	8.77529	8.07518	7.85138	8.33001	8.93169	8.80577	8.40186	9.25332	9.01849
PF3D7_0622900.1	8.40434	8.23778	8.915	6.49144	6.99031	6.84177	7.66952	8.27754	7.52565	6.89547	8.08921	8.19416	8.21883	7.57112	8.1619	8.20895	9.84284	9.29437	9.34949	9.7695	8.054	8.70505	8.01027	7.96775	8.15814	8.64176	8.68661	8.1123	8.95349	7.94087	9.39812	8.17954
PF3D7_0623000.1	7.76445	5.07967	5.52707	9.01244	8.15317	8.19437	8.25512	7.46449	7.81806	8.24345	5.82915	8.91979	9.32609	13.1437	6.44207	8.11314	7.51802	6.07734	5.98349	6.36551	8.63379	8.29416	7.1965	6.05453	6.89801	8.43016	8.56224	7.80201	6.13015	5.95942	3.36659	2.47863
PF3D7_0623100.1	7.63424	7.40943	6.11956	7.24509	7.27646	7.88923	8.3042	7.59819	8.16142	8.05811	7.52061	7.92787	8.13757	8.5583	8.04263	7.67275	7.32292	7.6559	8.01456	7.88867	7.59781	7.73387	8.03897	7.76288	7.84102	8.13507	6.87967	7.37547	8.04333	7.03244	8.16896	7.21723
PF3D7_0623200.1	10.3699	10.2332	4.48224	11.6651	9.99235	10.9386	9.98244	12.4125	10.8844	10.1063	10.522	12.7113	11.0373	14.5459	12.7759	11.368	12.413	11.7509	11.559	11.1895	8.87111	10.1444	11.2479	11.4839	10.9804	11.164	10.9634	10.5737	9.40684	11.1427	12.4991	8.38364
PF3D7_0623300.1	8.77418	3.41111	8.79366	8.96591	9.91319	8.2426	9.63057	9.96885	9.70133	8.69049	10.3523	10.2433	9.8865	13.1246	8.9458	9.03743	9.69335	10.166	10.6509	7.68416	10.0763	10.3242	8.06361	9.06835	8.49864	9.0426	10.418	9.32991	9.45919	8.40857	11.1658	5.38024
PF3D7_0623400.1	8.19373	6.74881	6.23816	5.85139	6.36217	7.26405	9.68852	11.8841	10.052	6.12377	6.28104	12.304	10.7719	7.79785	11.8399	7.48893	6.91726	9.00369	10.6548	10.3574	5.59452	8.05468	8.95354	10.4671	9.58086	9.1576	5.05761	8.97987	6.75745	5.26136	6.98535	10.2263
PF3D7_0623500.1	4.40641	8.43326	8.60918	5.0886	4.61255	6.57418	4.06401	4.95881	4.0751	3.53855	5.29177	7.08228	4.16655	4.3957	3.88353	5.22511	8.22953	6.14764	4.89754	6.4008	5.17573	5.53941	4.69609	5.47408	5.85681	4.34262	5.20744	5.90452	2.76148	5.89351	1.05	5.07741
PF3D7_0623600.1	2.98554	3.21885	2.78222	2.91669	3.52243	3.85961	2.74378	3.13312	3.00174	3.44535	2.57157	3.09353	3.66753	2.53336	3.05077	2.64508	2.56171	3.83056	3.29218	3.5288	3.44936	3.68615	3.7512	3.1638	3.12125	3.53684	2.18963	2.559	4.63689	2.07234	3.76877	3.35967
PF3D7_0623700.1	3.93348	4.6452	4.71994	3.01227	4.15624	3.13559	3.53317	3.72937	3.81021	3.65946	3.54039	3.82504	4.80061	5.23549	2.95626	4.46673	4.08092	3.84009	3.6106	4.76887	4.35632	4.60599	4.11128	2.85241	4.29746	2.95644	3.54852	3.15292	1.32894	4.06778	4.28094	2.0928
PF3D7_0623800.1	9.73904	9.71864	9.54457	8.49738	8.9384	9.34693	10.4755	9.35827	10.1237	9.00579	9.57252	9.87089	10.1958	10.264	10.1808	9.63305	10.8789	10.5509	10.7146	10.9915	9.48041	9.70143	9.94948	9.72636	9.95231	9.7485	9.4558	9.74681	9.7661	10.229	10.2395	9.72862
PF3D7_0623900.1	6.63773	6.83917	7.98887	6.11279	6.38535	5.94344	5.34009	3.92337	4.70179	3.75521	6.86907	5.87679	4.46414	8.84598	1.84929	6.18075	-0.313648	4.86241	4.96748	5.75439	9.20646	8.72087	6.1372	3.89885	4.7906	4.85131	5.34426	6.58189	1.56492	5.75794	7.47494	1.6336
PF3D7_0624000.1	6.89597	7.10422	6.61602	6.91908	7.51644	7.6643	6.61892	7.57053	7.00383	6.80682	6.7354	6.90108	6.41816	7.72289	7.41577	7.18803	6.75794	7.32108	7.41624	6.90517	6.54129	6.83023	7.78713	7.87991	6.26381	7.40898	7.42999	6.92747	6.21756	7.25426	7.75745	6.59939
PF3D7_0624100.1	6.19927	12.4011	6.8086	3.63164	8.70128	9.03315	9.1344	10.3114	8.45947	8.03591	7.59522	4.84022	7.14707	7.99432	7.73356	4.20976	10.4057	7.76108	7.6144	9.51695	7.59782	9.61427	8.16082	8.37515	7.82852	8.42851	8.43286	7.4478	6.9358	7.25695	5.8394	7.48986
PF3D7_0624200.1	14.2102	15.5847	15.3532	13.3942	17.2751	17.9003	18.3616	14.5076	17.5613	16.8465	14.8971	15.2251	16.5396	16.571	15.6104	16.5075	13.204	14.058	13.9384	16.2129	15.2077	12.7879	16.9247	16.8461	16.1632	16.3262	11.3637	16.7105	14.7065	11.2838	14.9414	15.0348
PF3D7_0624300.1	17.4729	21.7717	21.135	18.5617	18.1689	20.0511	23.0915	18.9277	21.9162	19.9311	18.6922	19.0822	18.838	21.3984	19.1454	19.7937	17.8732	22.1191	23.2333	23.7731	21.2853	20.8556	21.8675	21.2158	20.6951	20.831	14.7255	22.4863	20.9648	16.7395	19.8808	20.14
PF3D7_0624400.1	9.29148	12.3662	11.9048	9.63391	8.10096	4.5363	8.03677	9.83904	8.29693	7.85821	9.59109	8.60662	8.54778	6.41972	10.0114	7.86659	9.69004	9.97349	9.88972	10.8895	8.12749	9.48778	9.3985	9.77209	7.81341	8.70638	9.72562	9.3535	6.79686	11.8994	5.41188	13.2234
PF3D7_0624500.1	3.25515	1.38399	6.96959	4.2814	3.71908	4.32954	3.15206	-0.536421	3.3965	3.57404	3.44496	4.34182	3.77132	3.0169	0.649767	2.62628	4.45906	2.72255	2.60989	2.84816	5.05115	5.04239	2.79315	2.94953	4.74993	3.08056	-1.39587	3.96261	3.09889	-0.296455	6.40968	1.40784
PF3D7_0624600.1	10.0264	10.41	9.47944	9.13765	9.50052	9.40348	10.3242	9.79631	9.52679	10.0262	9.78593	9.94675	10.1889	10.5064	10.0505	9.7849	10.4801	10.1092	10.751	10.9086	9.93909	10.3186	10.213	10.1702	9.67028	9.75324	9.98266	10.0178	10.0375	10.1245	10.2553	9.69426
PF3D7_0624700.1	11.8918	9.46975	15.6128	6.61962	9.81358	7.29083	12.2441	12.5395	9.95899	10.9557	12.6839	8.51769	11.535	11.5457	10.4141	11.8823	8.07667	10.5281	11.8379	13.5364	11.9619	10.349	10.7905	9.32858	9.76521	11.0041	13.4885	11.476	9.38978	10.2908	9.16617	11.0328
PF3D7_0624800.1	8.95152	7.54374	7.75297	9.26781	4.32887	5.90108	8.94599	6.94452	9.08991	8.94288	8.51533	7.64773	5.97248	8.78694	7.66943	10.0668	5.74689	6.20656	8.29138	4.85375	7.75098	6.69255	4.62769	9.44908	7.81239	9.90839	11.7597	9.20115	7.79381	4.79681	6.99218	6.76584
PF3D7_0624900.1	7.85311	6.67843	6.62472	10.2965	6.9284	10.2257	9.67464	11.1985	10.031	7.44861	7.44023	5.99373	8.63442	7.66729	7.22661	8.22191	11.2677	5.998	6.4496	9.38384	8.62886	8.60548	8.36678	8.73489	9.10095	7.48592	4.11167	8.8464	12.3272	4.30666	6.43729	7.86715
PF3D7_0625100.1	19.1667	21.4883	20.9544	18.6583	20.3076	19.5863	19.7148	19.0466	19.3006	19.1307	18.2245	19.2307	22.3694	20.7857	19.1516	22.8535	23.1994	18.5347	21.0761	20.7739	19.8949	19.6342	20.4852	20.4754	19.5518	21.8544	21.1064	18.0472	20.7926	20.9509	19.3536	18.2448
PF3D7_0625200.1	11.0351	9.21683	15.7723	8.00304	10.5003	13.4759	9.14306	8.2716	10.0648	10.0967	10.3575	12.0247	10.1512	9.21413	9.57555	10.6945	8.69312	10.3676	10.5818	8.04586	10.7353	10.1592	9.23067	11.0799	9.22297	10.9614	13.8472	9.57234	8.56385	12.7466	8.98159	10.1099
PF3D7_0625300.1	6.29059	3.7153	8.26912	2.95956	5.35201	5.93162	5.19797	1.0277	6.47789	5.85683	4.36101	7.8137	5.95544	3.74083	5.49519	4.71358	7.64276	4.99912	4.69537	6.64539	5.50112	6.6096	3.86804	5.13197	6.43194	5.44871	6.31139	5.82633	5.15998	7.73931	9.93048	5.42063
PF3D7_0625400.1	6.4178	6.90001	7.45169	5.78662	5.80907	7.06534	6.05635	7.08161	6.49793	6.00926	7.11668	7.19301	6.44874	5.6836	8.52486	6.58496	8.27081	7.40239	7.10518	8.10373	4.90356	6.21458	8.0861	7.89868	6.19158	7.33588	7.40979	7.19469	5.23881	7.70315	7.83123	8.4687
PF3D7_0625500.1	7.4478	7.28881	8.92923	4.70311	6.46502	7.07794	6.57222	2.83008	6.95591	5.81009	8.18039	8.48521	5.40631	9.94477	5.04103	7.76417	6.26058	7.28422	7.08018	7.50114	8.14555	7.21433	7.23337	6.30595	6.34275	7.77997	6.09854	8.27763	3.048	7.32354	9.3407	3.73179
PF3D7_0625600.1	8.02522	3.4458	11.738	8.14305	7.49526	7.94689	7.91203	8.37964	7.97847	7.6262	8.91498	7.63086	8.25535	5.43806	8.40656	7.91486	10.7224	8.51914	8.24407	9.22863	8.53385	8.76936	8.20618	7.78726	7.82068	8.01105	7.74757	9.4442	11.7699	9.70321	10.2246	10.3852
PF3D7_0625700.1	3.05766	1.60867	1.58702	7.86141	4.32035	1.38037	4.20209	2.33947	5.1884	6.35848	0.383866	2.7351	4.59772	10.7446	2.91288	5.02411	7.09586	4.79719	4.74035	4.19396	4.4683	1.62639	1.48819	1.4211	5.74493	1.56295	1.31898	5.50771	1.85382	7.58755	1.31979	-0.396567
PF3D7_0625800.1	4.60551	7.17558	0.0546266	4.45842	4.14582	4.3126	3.65897	4.78776	4.70165	4.81369	4.17241	-1.01464	3.77653	8.79886	3.17302	4.75151	6.92682	5.38473	5.10729	5.3829	5.31598	4.17027	4.11662	3.66264	4.36317	3.94	5.92637	5.00575	5.12621	5.39439	8.42519	0.641279
PF3D7_0625900.1	3.17614	5.47928	5.63834	3.08494	5.78828	3.96021	5.74221	8.62086	6.11055	7.55373	3.57953	3.69194	5.98693	6.10022	6.79343	4.06489	4.28476	7.43808	6.83446	9.44694	5.77097	7.22948	7.01283	1.78662	7.12743	6.61224	7.84387	6.52139	5.92506	3.0853	4.64718	5.74685
PF3D7_0626000.1	9.37082	9.03487	9.21701	6.85695	8.45757	8.91535	6.76477	7.9487	7.45148	8.52651	9.57133	9.44257	8.14396	8.60175	8.53691	9.28677	9.78321	9.72507	9.90124	10.0216	8.93338	8.6111	9.3072	9.327	7.51002	9.16955	9.49064	9.25741	9.89494	9.3014	10.6147	8.5234
PF3D7_0626100.1	11.5658	13.9061	14.3155	8.25197	11.0073	11.2282	8.51791	6.02527	10.6466	10.1521	12.2199	10.7869	10.7665	9.37999	8.8242	11.4083	10.9532	10.1742	10.7924	10.6742	11.803	10.3805	11.1727	10.5858	9.83779	9.67544	10.8949	11.4051	8.95147	12.6699	12.1458	11.032
PF3D7_0626200.1	4.18955	5.9416	8.25648	2.54552	1.88785	2.76432	1.21957	2.96859	2.81267	2.54465	3.70958	3.38829	2.11339	-0.644159	1.53623	3.78519	4.07942	3.44385	2.09393	2.25177	3.93402	5.17232	3.70991	3.11556	3.37204	1.46919	1.99232	3.86683	0.562178	4.76148	4.21727	5.20141
PF3D7_0626300.1	2.53464	0.833359	1.74163	7.52174	4.14549	6.28505	3.81285	8.6798	5.67585	6.07489	2.98824	2.66954	6.13467	5.35225	6.50348	3.6569	-0.219463	1.97047	3.32967	2.04491	1.61152	1.27702	1.38453	5.76462	6.09805	5.046	5.99742	3.84301	2.51392	-0.80789	1.35406	3.37994
PF3D7_0626400.1	12.1706	11.475	11.6528	13.5046	10.707	12.8944	11.8272	12.9329	12.7039	12.3733	11.6964	9.19736	13.1431	12.5366	10.4548	11.9225	8.5913	10.2459	10.2436	11.0791	13.1839	12.7818	11.9221	10.8773	11.511	11.2465	11.5231	11.0716	11.9936	10.5938	10.0292	10.9333
PF3D7_0626500.1	7.26763	4.26483	11.4857	7.30861	5.70195	5.57252	6.00607	7.65254	7.01318	6.48888	6.79143	8.43359	5.61286	5.90117	6.32567	6.3145	3.96401	6.45619	7.85399	9.13411	7.34853	7.74722	5.46277	5.68082	7.16628	5.83404	6.71813	5.69868	4.76769	8.06909	3.82561	7.48519
PF3D7_0626600.1	4.20128	5.7575	4.57127	5.95486	4.31808	5.06408	5.03416	5.27719	5.93777	5.40696	3.05153	5.26216	4.68061	0.669201	4.20661	5.05769	-1.52453	5.07449	4.55114	4.74354	6.11978	5.82713	5.72789	4.50571	6.27091	3.91068	-1.72521	5.153	7.21921	5.19948	6.08334	8.49649
PF3D7_0626700.1	3.95541	2.77376	4.49007	5.86143	6.38889	7.31217	5.15161	5.26048	5.99126	5.57567	4.08729	4.40132	4.62885	4.95718	5.27122	4.2371	-2.71582	5.28829	4.71104	3.98824	5.36266	3.73305	4.10694	4.33993	5.85567	5.67358	4.37504	4.81604	5.02569	4.48466	5.7738	5.1508
PF3D7_0626800.1	9.17087	9.51793	10.0012	9.18035	8.31118	9.0459	8.41832	8.38647	8.3029	8.57722	9.5342	8.74027	8.34612	8.76441	8.29749	9.42107	8.88021	9.74831	9.57589	8.72907	9.3792	8.92716	9.92086	9.52411	7.87639	8.15547	8.09886	9.68296	8.97831	9.32225	8.85536	9.40009
PF3D7_0626840.1	15.5854	14.6449	14.9533	11.6598	16.8626	12.1493	19.209	13.9685	19.7308	18.9657	16.5713	24.8584	20.819	19.6093	22.7176	17.1979	12.6317	19.4818	20.9033	19.5679	14.5873	16.0633	17.9287	18.8329	15.5999	19.4042	20.7005	17.0916	14.5843	18.3906	15.1386	18.8579
PF3D7_0626900.1	1.28601	1.79607	-3.64064	2.18335	1.33523	0.269088	2.18482	-0.198191	1.8663	1.09986	0.485233	3.55263	1.82871	-2.79817	3.71889	-0.340858	1.06496	-1.16264	-1.23824	1.04903	-1.54459	-0.847525	-2.85912	1.6233	3.86935	0.211257	2.45183	0.206579	2.58987	1.95567	2.31848	3.86562
PF3D7_0627000.1	5.87412	5.80032	4.7502	6.24926	5.48597	6.10811	5.31927	5.18579	5.73126	5.44082	4.92198	5.64663	5.7115	6.11413	3.55338	5.78838	6.71111	4.19232	3.91532	4.77015	7.22416	6.09923	4.92244	3.46858	4.77182	5.32329	6.5107	5.26046	8.32422	5.21009	-0.124321	4.08522
PF3D7_0627100.1	7.33028	7.3066	6.24909	6.64184	6.93164	6.8599	6.97965	7.03859	6.91813	6.76118	7.36104	7.58805	7.46668	7.08375	7.24712	7.2671	7.06832	7.00581	7.35793	7.55854	7.1235	7.21703	7.36993	7.2796	7.15047	7.34437	6.34219	7.35268	7.55657	7.0098	8.14553	7.18781
PF3D7_0627200.1	4.3696	8.73974	2.03814	6.05582	3.02115	3.57813	5.28358	4.43937	4.95165	3.76091	5.18746	-1.86997	4.46523	1.82671	5.73173	-1.27116	6.39613	3.89007	3.14963	2.76092	2.99741	6.38847	5.06533	3.32647	5.12277	4.20332	4.65254	4.28037	2.46045	6.03126	6.45754	8.12819
PF3D7_0627300.1	7.50941	7.35001	6.86046	6.91174	6.73886	7.87036	7.42611	6.75855	7.57049	7.10886	7.58149	7.40251	7.24561	6.48494	7.2362	7.16347	6.6599	7.169	7.25783	7.25786	7.46929	7.67079	7.37859	7.5383	7.02704	6.98061	7.63879	7.11605	8.44165	6.81992	8.10156	7.62853
PF3D7_0627400.1	11.2429	10.7122	11.1307	8.0989	10.0754	13.3319	12.3892	9.51384	11.8453	11.5956	9.89004	10.5228	13.2949	12.9955	11.3127	11.1503	8.29113	10.9998	11.3876	12.4076	11.7255	10.3999	11.1995	10.3096	10.8167	11.1876	12.4933	11.9607	10.7889	13.4484	10.1352	10.4394
PF3D7_0627500.1	8.00968	8.13378	9.78109	7.70759	7.93511	7.82092	7.41875	7.05309	6.93877	6.11023	7.23646	7.3677	6.13334	9.14909	4.86591	8.15623	9.00819	9.34181	8.41841	6.89617	9.39766	9.59272	7.18748	7.51327	7.58294	5.54071	7.30215	7.92912	6.38901	7.32143	10.1579	4.36476
PF3D7_0627600.1	6.40723	6.25134	9.55088	7.81677	6.039	5.97431	7.79255	8.50439	8.07984	7.1119	6.17636	1.64485	7.23282	8.39191	7.00938	6.48197	8.68266	7.03254	6.71827	5.96967	5.91462	6.14688	7.0806	6.71517	6.90904	6.02193	7.07891	6.34569	2.61132	8.26375	6.37529	6.61209
PF3D7_0627700.1	5.25826	4.39847	5.36971	4.20163	4.39124	4.69457	3.60097	4.46918	4.39513	4.74449	5.21923	5.31744	4.56327	3.46631	4.4338	5.06796	4.61292	5.01648	4.65023	4.42607	5.06138	4.99163	4.94308	4.71197	4.47374	4.87654	4.14097	4.96191	5.70715	4.44849	5.87419	5.31901
PF3D7_0627800.1	4.60379	2.67839	4.38248	3.77521	4.51626	5.31471	3.91346	4.59591	4.38701	4.86172	4.48834	4.65944	4.95981	5.15843	4.07982	4.24057	2.85466	4.30304	4.33775	3.91861	4.92075	4.41656	4.01898	4.55169	3.92793	4.43781	3.51784	4.1013	4.55642	5.40809	4.55607	3.67832
PF3D7_0627900.1	4.52243	5.15826	5.30372	4.03119	4.83187	5.6165	3.43443	4.74685	4.88411	4.48925	4.06887	4.83327	4.25437	6.61404	4.49509	4.32552	4.79166	3.36964	3.76522	3.80671	3.50707	4.44439	4.67161	4.55998	4.53224	4.04013	5.28301	4.4325	-1.42519	5.19387	4.00802	2.41133
PF3D7_0628000.1	7.98466	12.3196	5.76767	10.0744	9.55131	8.65746	8.93315	11.584	9.71997	9.95988	7.74159	6.47084	9.98733	9.82773	11.2178	9.17025	11.0354	7.32469	8.85225	8.1182	6.572	7.92893	10.3589	8.18642	9.39453	8.87337	12.6759	7.52725	6.16119	10.4919	6.05667	9.68846
PF3D7_0628100.1	7.46346	6.11993	8.53522	9.53418	7.35875	7.9439	7.97229	8.04253	6.92203	7.2142	6.98655	6.86104	8.1924	6.36627	6.58414	7.17433	6.85722	5.68905	5.71883	5.5595	7.99123	8.64595	6.56707	7.23743	7.5108	7.67722	8.29113	7.51723	8.2876	5.74019	6.28767	7.20757
PF3D7_0628200.1	7.62459	7.5125	7.56971	7.80063	7.76594	7.56878	8.47193	7.85788	7.66797	8.13414	7.49336	7.91931	8.50495	7.58563	8.08293	7.75203	7.62811	7.46122	7.90986	7.91556	7.71223	7.79355	7.60496	7.38574	8.33294	7.82374	7.9514	7.53064	8.26216	7.48959	7.39357	8.04376
PF3D7_0628300.1	3.87891	4.21136	6.20007	4.87321	6.88947	6.88637	6.65225	5.22753	6.39281	6.02943	5.56234	5.41368	6.83454	5.55699	4.903	4.33024	7.36605	4.97327	4.93364	3.92469	5.87464	6.05074	5.18292	5.17057	6.35083	5.59073	3.32537	4.28771	5.92411	5.5735	4.1352	4.90242
PF3D7_0628400.1	4.38463	2.01088	2.73388	8.18048	6.4761	7.18016	6.20268	6.90166	6.77672	5.22857	4.63918	8.2574	6.87311	6.05422	8.75374	3.40991	9.16316	3.45822	2.79337	4.57434	2.66028	5.19948	5.0237	4.36306	6.99324	6.61642	6.97088	5.12472	3.49251	7.61101	2.24292	6.12545
PF3D7_0628500.1	4.2093	1.95055	2.16654	3.83529	5.10459	0.767885	3.67702	4.12482	4.02195	4.30758	5.8976	5.98651	5.04327	3.19794	3.51992	1.44569	7.72122	4.9702	4.99916	1.15208	4.86978	5.38351	3.92024	3.82325	3.43846	4.8214	-0.872247	3.07082	8.26205	0.222474	1.63805	4.58512
PF3D7_0628600.1	6.66236	7.11423	7.65886	4.85827	5.43486	5.79121	5.21321	5.29017	5.20008	5.43957	5.91592	5.28553	5.2804	6.52903	3.52867	6.82757	6.34146	6.39924	6.65087	6.3871	7.63716	6.52536	5.78103	5.93925	5.15037	5.41361	5.14581	6.21578	6.81017	4.82276	5.51479	4.22556
PF3D7_0628700.1	7.42184	9.3502	7.51077	8.72188	7.04262	7.57273	7.41978	8.92293	7.72378	8.09435	7.32859	4.23796	8.14341	3.66691	9.60148	8.14965	2.99476	7.749	7.69526	6.86176	6.62188	6.2721	8.04465	8.66341	7.30818	8.5353	10.4501	7.53342	9.6081	9.37042	9.292	12.3785
PF3D7_0628800.1	8.50205	6.76318	11.4483	9.58032	8.54143	8.39594	7.69783	7.80325	7.4804	7.84253	9.85249	8.63333	6.82027	8.72841	6.43755	9.20243	4.42419	9.28115	8.50591	9.38295	10.5107	10.7488	8.47976	8.31585	7.95872	7.33595	8.7905	8.89408	7.77809	7.2764	13.1315	6.68906
PF3D7_0628900.1	6.93691	4.54605	4.0532	5.08856	6.69045	5.53465	7.62807	5.53743	7.64727	6.87829	6.76902	9.13408	6.77023	5.72642	8.55977	7.38464	9.26579	6.59727	6.41686	4.99221	5.71296	5.97648	6.9895	3.70346	6.71985	7.31031	11.0418	5.49525	9.48098	7.17496	5.29734	7.44294
PF3D7_0629000.1	-1.51833	-3.31727	-2.54515	1.02447	-0.698365	-0.0782341	-1.2736	-0.450771	-0.959638	-0.506995	-4.19898	0.198233	-0.00504374	-2.02413	-1.07542	-4.13442	-3.81351	-0.359857	-2.51278	-4.32062	-1.50097	0.173688	-3.87093	-4.23039	1.42706	-1.38295	0.222888	-4.23022	-1.56771	-4.35931	-4.11071	-2.42892
PF3D7_0629100.1	5.73004	5.34916	8.01539	8.1749	8.83747	9.3182	7.97846	7.1696	8.1002	8.3676	5.12638	8.17036	8.06492	8.32436	6.07401	6.65125	7.21487	5.50589	5.16859	4.98602	7.59771	7.48302	6.27842	6.41616	7.0397	8.45055	7.25209	4.80072	7.13098	5.92792	0.525044	5.00257
PF3D7_0629200.1	9.07706	10.542	9.38718	8.63081	9.32298	8.59679	8.45485	9.09528	8.31001	8.77632	9.41023	7.38556	7.53242	8.14045	8.38238	8.62125	8.84133	8.7113	9.1533	8.85434	9.23545	8.90137	9.12223	9.19645	8.18245	8.78971	9.48637	9.70826	9.27595	9.25626	9.38155	9.52958
PF3D7_0629300.1	6.37077	10.9231	6.56118	8.13466	8.53291	6.01018	5.46419	8.31039	6.16807	5.81209	7.78332	4.74899	5.98077	8.22157	4.6407	7.24183	9.02953	5.69157	6.78575	7.54871	8.4421	8.17758	7.18165	7.18187	5.47564	5.67887	8.35427	7.904	7.23275	7.22806	4.64945	5.19056
PF3D7_0629400.1	6.33839	7.04004	5.41423	5.02793	6.08211	7.38681	6.58964	6.53181	6.15593	5.68498	6.25172	7.10104	6.34356	6.33825	8.48553	5.66706	8.03196	7.09499	7.77332	7.3124	4.15394	5.04633	7.43637	8.23497	5.8334	6.21149	7.04819	6.36645	5.02444	6.83282	6.76326	7.47192
PF3D7_0629500.1	6.73579	5.98031	7.61475	5.26209	6.98879	6.90177	6.4181	6.52977	6.66423	6.41179	6.33435	6.84706	6.45261	8.14607	4.32126	7.11842	7.94491	7.03581	6.75715	6.99208	8.57512	8.3467	5.53781	6.40986	6.73633	6.11333	5.93757	6.63857	7.65322	6.1318	7.96778	3.46058
PF3D7_0629600.1	5.16979	4.96566	3.98947	5.48338	4.45242	4.86763	4.55028	5.64953	5.48035	4.89874	5.37703	5.00578	4.5816	4.62984	5.31199	4.99284	4.6931	5.35662	4.4955	4.00441	4.82678	4.87785	4.46064	5.12723	4.97543	4.9659	5.3087	5.1236	5.21302	5.90759	5.05454	5.49679
PF3D7_0629700.1	6.1966	6.17074	5.6752	6.55751	7.36969	6.89512	7.64251	6.9686	6.61551	7.14705	5.95403	7.18288	7.98645	6.4285	7.61973	6.29129	7.13703	6.72611	6.39921	7.23595	6.0995	6.35451	6.23101	6.11464	8.02098	6.98579	6.52977	5.71027	7.25152	6.96677	6.73954	7.03156
PF3D7_0629800.1	6.45195	6.92485	6.03641	5.50613	6.46115	6.44183	7.05499	6.53526	7.1104	6.74378	6.32164	6.02974	6.40373	6.7882	6.83035	6.26593	6.95692	6.94544	7.00245	6.84391	6.42568	6.50336	6.44588	6.72765	6.76492	6.93702	6.49992	6.44076	6.75308	6.77124	7.37264	6.51125
PF3D7_0629900.1	5.09546	6.09638	5.38547	5.07539	5.55288	5.9563	6.31667	4.60109	6.15967	5.59491	5.7546	5.19322	5.41295	5.59107	5.41559	5.26947	5.87729	6.69464	5.98041	5.3865	5.75821	4.93998	5.76648	5.64559	5.95271	5.75533	3.47658	5.44897	6.15667	6.0235	5.57739	6.06653
PF3D7_0630100.1	2.50908	0.793668	5.81659	4.15322	2.50845	2.98275	2.87262	3.29283	3.67363	2.56292	3.66951	3.82691	2.10001	1.97841	2.2935	3.13238	0.905731	2.11572	1.24034	3.5198	3.82225	3.97461	2.4497	-0.937556	4.56224	3.4085	3.63096	1.44327	1.57811	4.09206	0.526392	3.23685
PF3D7_0630400.1	7.88715	6.00951	6.52377	4.21499	4.80177	8.82779	6.75484	5.30681	6.65793	5.83414	8.70255	9.45597	4.00304	7.98123	6.52237	7.14253	11.2611	7.28699	5.92205	7.07128	7.17387	7.06373	7.46589	3.08001	7.04804	7.02262	9.66019	8.37462	6.60438	8.63171	5.51126	5.4465
PF3D7_0630500.1	8.53342	7.6849	8.78585	9.19199	8.34628	7.12672	7.46655	9.58709	8.45887	8.80164	7.94174	8.90089	8.38624	8.79759	7.8912	8.72833	8.18484	7.91532	7.81232	7.90049	8.77355	7.52399	7.95599	6.95436	7.44439	8.56639	8.81657	8.03858	8.97296	8.3394	1.47917	8.46766
PF3D7_0630600.1	6.76559	7.8173	3.10506	7.78372	6.36563	6.71978	5.95964	7.73875	5.90021	6.26899	7.49232	7.20923	6.71995	4.65454	6.79285	7.1285	0.838663	7.34891	7.21659	6.5363	7.2116	6.14976	7.93665	7.70789	6.64587	6.53683	1.14362	6.83363	9.4909	6.17099	8.88821	9.23145
PF3D7_0630700.1	8.31516	10.2198	11.5404	6.69841	7.40568	10.1292	7.15477	8.24435	7.17698	7.2289	9.68646	9.46697	7.41174	11.5403	6.23295	9.36179	11.248	8.54583	9.01388	9.98639	9.10912	8.41563	8.04154	8.84409	7.72796	7.4025	9.13128	9.11548	4.53852	9.30779	4.71338	5.0179
PF3D7_0630800.1	13.9679	19.7061	13.4398	13.7104	11.8026	11.0453	15.1366	10.9192	14.881	13.7118	14.9764	11.4636	14.0295	14.6541	11.7382	13.183	15.9719	13.3236	13.8684	15.1668	15.3109	15.7088	14.2344	12.7892	14.0784	13.4744	14.2257	14.1604	13.6286	9.3211	11.9781	12.8143
PF3D7_0630900.1	6.22345	5.70682	5.96556	6.68938	6.31565	6.76403	6.60248	6.69356	6.6	6.9462	6.09955	7.36297	6.98311	7.10121	7.40678	6.82758	7.04609	6.39844	6.48942	7.23104	5.68519	6.49873	6.58612	7.36673	6.90835	7.33392	6.28889	6.25941	5.83713	6.25144	7.90277	6.11197
PF3D7_0631000.1	8.53214	5.4929	12.8947	8.48228	8.71763	4.69329	8.22237	7.92605	8.09431	8.25409	9.59407	3.96897	8.63069	6.66162	6.65879	7.47625	5.75489	6.99689	7.87051	4.70691	9.54009	10.1564	8.49072	6.58351	7.35086	5.61336	8.31873	9.20469	5.36954	8.5397	12.8587	8.78901
PF3D7_0631100.1	5.6113	8.62509	1.63618	0.0615314	1.33179	5.6509	4.84693	5.46472	3.56664	4.68794	2.00983	6.18109	3.58794	0.912977	3.85191	5.89236	8.95519	3.91389	2.30444	2.01091	2.67807	7.08882	3.83646	4.95446	6.02064	0.0131625	6.28234	2.03876	2.25868	3.332	9.82189	2.66293
PF3D7_0631600.1	18.8392	15.1463	14.963	13.0761	18.6537	21.689	22.9454	14.9057	20.6862	15.3365	10.9238	15.9712	19.3253	18.7026	20.9915	20.6099	13.7537	17.0281	18.1218	19.2718	15.633	10.5923	18.7007	16.6766	16.834	22.2187	21.5598	17.3947	21.9992	20.9841	15.71	18.9014
PF3D7_0632000.1	-0.594227	-2.53755	-1.85524	1.69249	2.03067	-3.9122	-0.24962	0.861068	-0.967248	-2.13956	0.131893	-3.66433	-0.173822	-0.501513	-1.65194	-3.57679	-2.72133	-2.20156	-1.88112	-3.37473	-0.10701	-2.1974	-2.69257	-2.99219	0.283647	-1.26334	-4.11752	0.994095	-0.962483	-3.54261	-2.79229	-0.551234
PF3D7_0632400.1	4.29091	0.893304	1.89479	3.47239	2.94086	-1.70906	2.59798	-0.64253	1.97421	3.29977	2.73237	0.298464	3.68725	3.74287	1.70146	3.52154	-0.708465	0.632167	1.47229	-1.85128	2.24834	-1.69871	-0.0553904	3.71389	-0.232306	2.78933	4.13571	3.4675	2.48535	-1.3149	0.339829	1.38311
PF3D7_0632500.1	9.24851	9.22167	6.83588	7.70501	5.20716	7.08582	8.66593	5.64783	4.35711	6.35032	9.50594	6.65557	7.49703	7.15137	6.99938	9.27382	8.84674	8.44562	8.93247	8.04699	8.36371	6.70018	9.48325	8.23371	5.60077	7.36013	7.52717	9.48118	11.4399	7.70524	8.53239	9.05802
PF3D7_0632600.1	2.64463	1.3434	1.85413	3.58335	4.63171	-0.105895	4.40798	-0.0194915	-0.0225561	2.32375	-0.326344	0.588533	-0.477432	3.17145	1.51183	-0.302375	0.485589	3.77821	3.86601	-0.155113	2.15907	0.556598	0.0157959	4.0423	-0.152953	2.57747	-0.675479	-0.198191	2.51266	7.85275	0.944867	2.43231
PF3D7_0632700.1	0.0518036	-3.61345	-2.81525	-4.91271	0.158656	-4.99095	-1.47004	0.633264	-1.264	1.18772	-1.06908	-3.76215	-0.0924139	-1.59157	-2.77759	-2.13044	-4.02729	-4.97428	-3.50604	-4.66891	-0.971457	-2.48934	-2.72111	-3.17278	-2.4521	-1.76186	-4.38423	-4.79277	-1.90683	-4.38563	-3.83933	-2.82035
PF3D7_0632800.1	7.53535	10.9057	11.2453	6.78912	6.33826	6.99045	6.81339	5.79756	6.0561	6.1508	8.48241	5.63723	5.87335	7.73247	5.17762	8.55883	10.8145	8.64035	9.24918	8.43017	8.94764	8.14634	7.11893	6.97185	7.98516	6.80898	8.12878	9.31203	6.50492	10.0742	9.04816	6.80721
PF3D7_0700100.1	4.39312	8.60167	8.59146	6.67386	5.21733	8.04452	6.15453	1.225	5.15634	3.95993	4.52845	5.33012	4.7047	5.27938	6.80422	5.07621	9.80229	7.55484	8.35046	7.88683	4.27709	6.06078	6.91382	7.73978	6.43799	7.04992	7.86252	7.41271	4.0866	8.1118	10.5708	6.78582
PF3D7_0701400.1	9.33149	3.74439	15.1129	10.1905	8.8064	11.7755	9.12586	9.65102	9.5805	9.01754	10.2448	12.1637	9.03007	4.0023	9.56607	9.99607	11.6893	9.96705	9.42176	10.2033	10.3609	10.825	9.67038	8.77468	10.4821	9.15587	8.31012	10.2041	15.1248	10.3124	10.6705	13.1417
PF3D7_0701500.1	-3.44611	0.117072	3.39959	-6.25977	-3.76341	-4.97651	-4.67973	-7.13876	-5.02984	1.05475	-4.1399	-0.716741	-5.18533	-7.06674	-3.37388	-3.12013	-5.4111	1.57459	0.731383	-3.9213	-1.25701	-1.54136	0.863053	-4.90951	-4.46686	2.9181	-5.65597	-3.9019	-0.760908	-1.69822	-6.92613	2.27453
PF3D7_0701600.1	4.2709	1.74276	2.13819	0.830397	8.76536	6.74312	4.21068	1.32805	4.49561	4.21758	-0.0935621	7.78398	4.95735	2.75264	2.52894	-0.33114	0.670822	3.12727	1.47291	0.0593592	3.20609	2.98622	0.937256	5.14283	3.26668	0.170631	0.343446	-0.000290768	2.59325	0.198045	1.27844	0.940331
PF3D7_0701800.1	4.37754	6.88659	6.96974	9.87692	8.99008	5.42664	8.34173	4.98482	5.06556	8.74492	4.86433	5.37333	7.61991	7.37755	7.66398	5.30119	5.38617	6.1248	5.014	8.69775	6.12619	8.20138	8.03303	7.62568	5.17721	11.0471	9.18317	4.86336	7.21515	4.32835	5.98673	6.63913
PF3D7_0701900.1	6.07085	7.43236	5.83895	9.08167	10.6782	9.62391	10.5886	8.12609	9.70313	10.1537	6.83483	9.08972	10.1416	7.75672	8.99252	7.69361	4.95478	4.08392	4.18966	7.95818	7.5752	8.52041	7.21187	8.16013	9.70734	10.4945	8.36018	6.22058	8.16403	5.80062	7.11939	7.53269
PF3D7_0702000.1	4.685	5.56548	4.23424	7.52323	9.47559	8.38463	8.71434	6.95003	9.33759	8.96974	6.01035	8.19736	9.44548	6.64656	7.31012	6.66161	4.90259	3.29665	1.99537	4.55779	6.50694	7.29338	5.97095	6.49554	8.55742	8.72701	5.86905	5.09875	6.53232	4.30088	5.65285	5.7554
PF3D7_0702100.1	3.40444	3.97625	2.57272	6.40676	8.18691	8.99767	8.8171	6.28348	7.76643	7.81695	4.58356	7.28064	8.32036	5.64601	7.87947	6.32234	-1.62524	1.7257	1.91482	4.7453	4.55258	4.95673	5.93055	6.28324	7.21336	8.15717	6.05351	4.03645	4.65446	4.01534	5.83878	5.86208
PF3D7_0702200.1	8.08082	6.8315	7.74778	7.51569	7.6989	8.89801	6.88549	6.99986	6.96899	7.35488	8.23953	8.34858	8.01324	7.54848	7.01692	8.29194	6.99283	7.01371	6.30559	6.2922	7.77149	7.1319	7.04404	7.89566	7.33002	7.32758	7.82728	7.83546	7.2929	7.60211	8.37661	6.76253
PF3D7_0702300.1	6.08572	5.22434	5.40924	6.99081	8.31223	7.83697	8.20249	7.00374	8.69887	8.37441	5.81009	7.88286	8.30036	7.06856	7.11252	6.42571	4.78447	4.7265	5.41607	5.55629	6.98868	6.90732	6.10216	6.02667	8.01944	7.33529	6.18429	5.64112	7.32092	5.21104	4.95394	6.19297
PF3D7_0702400.1	10.6652	9.78329	9.58536	8.34934	9.69385	10.2316	8.98161	11.4269	10.5676	9.10476	11.2666	9.29087	10.2794	10.2342	9.40811	10.0742	9.34374	9.33525	7.98122	9.84503	10.5901	9.87915	9.8041	9.57636	9.05658	10.2181	10.2344	11.0204	9.88179	10.1271	9.13235	9.51933
PF3D7_0702500.1	9.36548	9.57672	8.97128	9.78806	9.87779	10.5973	8.74746	10.7072	9.6205	8.72863	9.88202	7.98604	8.99275	9.02888	8.81162	9.32486	7.83378	8.53166	7.67034	8.74939	9.76206	8.81205	8.89142	9.65823	8.9506	10.4264	9.18312	9.73561	10.082	9.28164	8.54649	9.3979
PF3D7_0702600.1	9.31529	5.56991	6.41356	10.8989	9.96945	11.6965	9.02813	10.4251	10.4685	9.83417	11.3819	11.377	10.2575	8.3546	9.94983	11.0389	13.751	7.61247	7.3333	8.74742	10.385	12.0415	8.85552	9.3579	10.9283	9.83029	10.8593	10.4428	15.306	11.1605	16.8384	8.7641
PF3D7_0702900.1	7.01994	10.083	8.73551	7.23205	6.84101	7.78478	6.38464	7.1377	6.62652	7.32072	7.47441	4.38074	7.57378	8.99013	0.884967	8.75365	7.9762	6.1284	5.53747	6.17848	12.3893	9.031	5.85208	4.46378	6.28169	5.37363	5.35493	7.27052	10.8294	8.06436	0.0895236	3.52132
PF3D7_0703000.1	4.16597	2.50516	2.84416	3.68658	3.57757	4.64421	2.5336	5.33504	4.46816	2.85228	3.85525	2.94744	4.01298	3.52111	3.63685	3.09319	5.35917	3.29946	2.63783	1.06074	3.27644	3.82073	3.49793	2.25442	3.65201	4.43636	3.80815	0.999849	3.38186	4.95584	1.82961	3.21774
PF3D7_0703100.1	8.71867	9.5461	11.4335	6.1986	6.66316	8.50855	6.95562	6.85653	7.08566	8.14324	8.69003	9.02021	7.91869	5.83878	5.30091	7.85951	11.8882	8.3013	7.52012	6.85166	9.88473	9.62889	7.25921	7.30068	7.02097	7.14576	8.29336	7.3002	10.6975	7.86922	2.69582	8.07363
PF3D7_0703200.1	6.12489	6.43537	9.06369	5.70199	5.58868	5.85361	5.91719	5.91236	5.25709	5.07256	5.37367	6.32723	6.29796	2.19432	8.05369	5.50028	7.94601	5.97731	6.12193	6.51791	3.78063	5.99271	6.80384	7.25172	5.84733	6.79635	8.26076	5.29651	4.92181	6.99104	6.7964	9.45721
PF3D7_0703300.1	9.23521	9.42595	10.3258	10.4762	10.3747	11.3374	10.1752	12.0792	10.2082	9.70302	11.2299	7.8663	9.6871	12.4841	10.9152	9.34918	12.9442	11.0104	9.88233	11.7516	9.79774	10.5119	11.4767	10.6707	8.18338	11.4052	13.2981	10.0162	10.176	11.8403	8.40883	9.44947
PF3D7_0703400.1	8.20917	3.12815	4.25515	7.32259	7.89041	6.13713	6.20565	8.23743	7.70034	6.84898	8.21592	9.65583	7.53205	5.67177	9.28777	7.09133	6.63357	5.52815	6.18298	6.37466	6.2426	6.95694	7.31156	6.76876	6.33127	7.62541	8.2391	7.53785	9.61461	7.83722	8.94565	8.73175
PF3D7_0703500.1	8.23992	6.64889	7.32525	7.06003	7.97747	7.16086	6.52552	7.36418	7.23672	7.78329	7.96618	7.99166	7.3797	8.48616	7.34462	7.8409	6.65266	7.63053	7.86783	7.75437	7.92329	7.61644	8.00025	8.13636	6.03268	8.01956	7.71811	7.32837	7.91016	7.25544	8.14411	6.71309
PF3D7_0703600.1	9.00979	13.9321	6.9526	7.71332	9.11993	3.59534	9.3957	8.83341	9.8622	8.426	8.82252	7.19302	8.60734	8.79341	6.07088	8.8002	4.20735	7.26546	6.36506	8.76792	11.2443	10.7362	8.39281	5.97492	8.14525	7.30916	8.68421	8.79568	7.53956	6.92819	5.24503	7.91458
PF3D7_0703700.1	6.77167	6.05137	5.44074	5.58203	6.89213	5.65964	5.92785	6.36308	7.22987	6.45679	6.9089	7.50436	6.70248	6.19494	5.32959	6.71174	6.11702	6.1299	5.43413	5.17644	7.60028	7.10356	5.74663	5.27373	6.7673	5.75226	5.62299	6.8117	7.65585	4.9538	6.46713	5.4694
PF3D7_0703800.1	3.87632	6.14292	5.73819	4.19465	4.89289	5.53451	4.2198	4.17143	4.9637	3.80188	1.88009	3.41775	4.54888	6.59001	3.44917	4.63648	4.57219	3.46656	5.93891	4.8402	4.40505	5.54819	4.14537	4.93163	5.34862	4.73944	4.70507	3.70146	0.674292	4.80433	5.89583	1.52759
PF3D7_0703900.1	6.73468	5.88496	5.9527	5.93264	6.02345	5.74894	6.0406	6.30988	5.90178	6.56333	6.4109	6.926	7.08701	6.458	7.09445	6.30444	7.04264	6.8682	6.74899	6.75663	5.79019	6.02291	6.32747	6.50143	6.36921	6.47157	6.54665	6.17389	6.28238	6.45295	6.8583	6.58641
PF3D7_0704000.1	4.83397	4.77329	6.3423	3.31516	3.84671	4.08123	3.1502	3.82414	2.89573	3.63793	5.22766	4.14141	3.47848	3.3892	2.31474	5.1476	5.70573	5.75861	4.77598	5.77289	6.03195	6.12028	4.51804	3.25057	4.50198	2.93629	3.9463	4.08035	5.8158	4.63	7.69276	3.41821
PF3D7_0704100.1	11.8782	13.2163	9.13805	12.7049	11.3028	10.6744	12.4401	12.2229	11.9467	11.6889	11.2543	12.928	11.4096	10.1012	13.0284	11.2419	11.9511	11.1583	12.4078	11.3967	10.6761	12.1246	12.0882	11.5659	12.2896	10.4721	12.5285	11.1533	12.4094	11.0721	11.0251	13.4347
PF3D7_0704200.1	9.7278	13.4943	8.62022	9.837	9.98674	8.62884	8.59707	10.8755	8.3226	9.19833	9.5981	10.0736	8.74258	10.7039	7.70369	10.2059	9.93433	10.1968	10.1393	10.5838	11.0091	10.544	9.65304	8.60191	9.59239	7.58005	8.65945	9.17459	9.04751	11.0788	6.48266	8.37992
PF3D7_0704300.1	9.49912	6.6819	12.2106	10.3326	10.6622	9.40624	9.29199	10.6387	9.6872	9.335	9.5022	9.06345	9.00581	10.0429	10.1225	9.19886	9.3542	9.49234	10.6575	9.83357	9.18211	10.1866	9.47696	9.99123	9.53313	9.24696	11.1971	9.62031	7.77926	9.6047	12.1983	9.00384
PF3D7_0704400.1	12.0987	10.9529	11.4893	12.1263	9.9919	11.4534	10.5529	12.5129	9.77351	11.1247	12.6914	10.0011	10.2508	11.2783	11.3587	10.7597	13.3324	11.4886	11.307	10.9274	11.066	10.6521	11.629	10.5561	10.3405	10.9332	12.0196	11.8261	11.6859	12.8642	8.87375	12.2334
PF3D7_0704500.1	7.40224	9.14741	4.75927	7.57923	7.5972	4.25299	8.53685	8.8037	7.68488	8.03836	7.89336	4.74618	8.25323	5.60838	9.99463	7.53347	8.78098	6.8794	8.10254	7.76054	5.42671	6.26384	8.09447	8.61059	7.69714	8.10664	8.73099	6.92049	8.70425	6.67194	10.4488	10.3227
PF3D7_0704600.1	10.0047	10.0352	9.51915	9.39952	9.10898	9.48001	10.5107	9.63937	9.61457	9.80594	9.76352	9.72158	9.82964	10.3587	10.3984	9.66616	10.3645	10.5718	10.8825	10.959	9.49102	9.55198	10.1987	10.1766	9.67301	9.78579	9.78112	9.8846	9.94547	10.156	9.88309	10.1623
PF3D7_0704700.1	5.28897	5.77732	3.62739	5.41559	5.08462	4.9595	5.33456	5.98839	5.61232	5.66769	5.6995	5.27439	5.8362	6.3263	5.78999	5.18155	6.37758	5.92224	4.95239	5.77179	5.31568	5.51295	5.56926	4.59534	5.68985	5.74128	5.42895	5.21501	5.52283	5.74077	4.83819	5.12088
PF3D7_0704800.1	10.0391	10.151	9.71856	11.115	11.2341	12.1065	10.9872	9.56897	11.8121	10.8626	11.0426	12.3761	12.3314	10.4616	10.3915	11.1298	9.34363	10.1807	10.6194	8.49369	11.9181	11.8903	10.7638	11.4923	9.81775	9.9759	12.1236	11.5757	13.4647	10.9283	9.97592	10.7076
PF3D7_0704900.1	14.2044	15.4377	15.1515	18.0005	16.885	19.138	16.9171	14.3211	15.5937	17.6585	16.768	15.1298	17.7273	16.9317	15.8309	15.7637	13.7391	15.5729	16.4265	15.7208	17.6461	16.4089	15.9033	16.7764	15.4265	17.642	17.0818	16.0882	20.4008	19.1045	15.2463	16.4844
PF3D7_0705000.1	8.7383	8.09567	9.09388	9.23256	8.31175	8.15804	8.64679	8.77477	7.55088	9.33408	8.63876	7.97502	8.25488	8.50075	8.82882	8.7797	8.68622	8.72639	9.24278	8.68202	8.33079	8.50301	8.81903	8.5325	8.74267	8.49831	8.73258	8.44752	8.4164	8.50652	9.8306	8.83481
PF3D7_0705100.1	9.39103	7.12709	7.03875	7.40942	4.73418	6.04784	7.45439	5.40732	7.02331	7.06922	9.11546	8.42602	7.16673	7.827	7.72887	7.53003	6.27895	9.07462	9.90525	9.03616	7.96386	8.30183	7.89191	7.69837	8.35541	7.49353	3.97962	7.77195	7.15596	8.43631	13.5137	8.21397
PF3D7_0705300.1	10.7466	10.7526	10.4207	9.99546	12.7868	10.6325	13.1532	10.5869	13.6607	12.8169	9.44498	10.9667	13.2536	12.1226	12.0454	10.0077	9.00033	10.5115	10.9478	11.5368	11.5071	11.2929	11.6167	11.1952	11.6995	12.8827	8.4141	10.934	11.069	11.3967	10.3842	11.8258
PF3D7_0705400.1	8.11681	7.07178	7.13033	9.40607	8.57031	5.37398	8.94383	7.46271	8.21394	8.77073	5.11304	9.40501	9.42747	7.49549	8.90632	5.95667	5.87723	6.71535	7.28513	8.23008	7.20691	9.44389	7.0282	7.931	7.92273	8.22744	9.28996	7.2264	7.3119	4.26711	6.06882	7.90112
PF3D7_0705500.1	8.0053	7.53083	7.28367	7.71605	7.97055	8.07924	8.24424	8.11779	7.81736	7.86539	7.96387	8.58387	9.04625	8.05637	8.66752	7.94775	7.92164	8.41223	8.50047	8.6972	7.86009	7.75245	7.91774	7.78725	8.57201	8.2865	7.85493	7.99237	8.85472	8.40783	8.34312	8.40684
PF3D7_0705600.1	5.25099	5.64456	6.90158	4.93617	5.35497	4.6568	6.73648	3.54185	5.39495	5.12587	4.11384	6.04018	6.07383	5.21566	5.22496	5.42992	6.50825	4.86462	4.97804	6.45188	5.21372	3.96556	5.52297	3.20587	5.92156	6.1172	4.59309	4.66599	5.102	5.66632	-0.0122052	6.10857
PF3D7_0705700.1	9.80149	9.32661	10.9976	8.61481	9.15727	8.75533	7.84035	8.88818	9.1598	8.77852	9.41815	9.29744	9.19202	8.22686	8.99332	9.69068	10.375	10.3193	9.59604	9.52319	9.15921	8.75885	9.25312	9.39991	8.9543	8.24376	8.92419	9.05849	8.95354	10.2296	9.8254	9.86351
PF3D7_0705800.1	16.3783	17.2212	16.8533	20.7604	18.7108	21.9827	20.3858	17.3766	22.4754	20.1092	18.8763	18.4283	21.6036	20.7473	22.2357	17.9632	15.6965	18.8821	17.901	20.023	16.4187	15.5399	20.4976	21.0507	19.6617	21.4499	14.4649	18.5733	16.3287	19.889	17.8804	21.1008
PF3D7_0705900.1	10.8877	14.9743	7.3365	12.4326	11.3454	13.3612	11.1624	11.6775	11.7554	9.95549	10.7112	10.3783	11.621	15.1494	10.0018	11.9349	12.9948	12.3424	12.264	11.9435	12.1661	10.7805	12.185	12.0053	10.3197	10.5423	10.7872	11.0674	12.6392	11.3576	7.33671	8.62341
PF3D7_0706000.1	7.23993	6.70224	7.15051	6.29386	6.71158	6.63874	6.37231	6.44829	7.01564	7.07247	7.22913	7.25063	7.23575	6.78137	7.07231	6.81944	6.47574	7.01882	7.15469	6.63878	6.81767	6.66762	7.01138	6.7263	6.76408	7.25287	6.79828	6.67881	6.5911	6.62603	6.81983	7.12679
PF3D7_0706100.1	4.37021	5.52828	5.95847	4.4443	4.1733	4.23655	5.59709	2.5066	5.40122	4.52565	5.29185	5.31775	5.17729	6.623	4.70746	4.07952	5.98563	4.63111	4.13979	5.22554	4.15594	3.22424	4.02621	4.51422	4.6831	4.87091	5.14847	5.30804	1.5966	4.26661	0.168788	4.04836
PF3D7_0706200.1	6.04228	10.2251	3.66635	1.70992	5.47515	1.95254	7.46393	2.66269	6.88688	5.42753	5.63901	3.47971	4.51069	5.72261	3.33624	5.0414	9.14425	5.57615	4.51409	1.65854	6.72599	5.2551	6.85687	1.74815	5.65881	3.81234	1.82359	7.07258	3.89995	5.97806	3.49098	5.43832
PF3D7_0706300.1	10.0723	13.0832	11.6154	8.02111	8.65363	8.96231	8.05286	10.051	8.3592	7.77418	9.85884	11.088	8.16307	7.55214	6.18452	9.70646	11.6234	9.66931	10.2703	11.2671	12.1357	11.66	9.07506	9.61493	8.31487	7.30498	7.4007	10.3461	12.6318	10.6955	4.42472	9.82502
PF3D7_0706400.1	9.78628	9.38317	10.1839	8.91549	8.98392	8.32405	10.1148	9.93349	10.0841	9.06393	9.1094	8.68217	8.80452	10.2588	8.74273	9.11384	9.55306	10.0931	10.1337	9.96594	10.139	10.3817	9.42327	9.30875	9.26835	8.76636	8.56442	9.60905	8.89158	9.30482	9.61113	8.76168
PF3D7_0706500.1	9.15486	9.09325	8.30091	8.18947	8.99937	8.84711	9.62719	8.9152	9.56054	9.26311	8.6431	9.74314	9.57543	9.71922	9.4372	8.7046	9.49564	9.09305	9.60773	10.0571	9.08545	9.62728	9.04455	9.05722	9.39888	9.24751	9.15893	9.04135	9.30079	8.68575	9.43043	8.62221
PF3D7_0706600.1	4.61242	-0.722581	-1.14437	4.22581	3.71602	4.50524	3.67953	4.50846	4.99824	4.21735	3.58242	4.27426	4.97862	6.06692	5.37379	2.68443	1.06681	2.9357	2.77372	3.23406	3.9128	3.94203	4.5693	0.021799	4.12364	5.44382	3.86639	3.48106	5.04475	4.91442	4.49938	3.02336
PF3D7_0706700.1	0.441751	-0.48464	0.504818	1.59148	2.59538	1.76756	0.742704	0.759539	2.68879	1.55803	0.989337	3.05883	2.38498	0.945588	0.0007612	-1.73172	2.19179	-0.773607	-0.34378	-2.61343	1.78719	2.51666	-2.90833	0.455335	2.88951	1.55562	1.64648	0.645118	1.86338	-2.25214	-2.17692	-1.03995
PF3D7_0707200.1	10.2629	8.79565	11.7419	7.61105	9.1865	11.2298	9.39067	7.75281	9.11925	8.99058	8.64644	12.9673	10.6832	8.5265	9.21696	10.9303	8.10053	8.42848	8.9589	7.62289	9.5115	9.5877	9.26251	9.85253	9.15584	10.0235	10.8448	9.34145	8.27321	9.84399	8.37081	9.13292
PF3D7_0707300.1	8.47491	9.63439	10.3129	9.96582	8.69102	10.4991	10.7768	7.52465	9.69744	9.59953	10.3294	8.40221	10.0212	8.589	9.27882	9.80565	12.7009	8.91826	8.70674	9.59951	9.54311	9.98277	10.4706	9.61052	9.09203	8.08523	10.3415	9.97101	10.8085	10.778	10.1664	10.2787
PF3D7_0707400.1	10.2105	11.4135	12.3986	9.91205	10.0489	10.7526	8.21158	9.6813	10.1623	8.97441	10.6973	5.3775	9.1963	7.18047	7.5029	10.1361	9.5802	9.55994	9.98983	9.81385	11.7676	10.4856	9.92441	10.3706	9.24221	10.0488	9.25198	10.0582	13.6317	8.75391	12.9041	10.6637
PF3D7_0707420.1	10.2622	10.0074	11.0745	12.0969	11.7809	12.3462	10.7441	13.9726	11.4018	11.5426	12.7369	16.7486	12.6411	13.3982	13.5982	11.3663	7.17745	12.5542	13.5354	13.5284	11.739	13.1739	11.9967	11.9216	11.6822	12.844	14.1963	12.7472	10.796	12	8.65969	11.7863
PF3D7_0707500.1	2.83552	2.60512	2.61775	3.49228	4.88293	4.6309	3.62343	3.76878	4.68948	4.8257	3.39246	4.92752	5.29653	1.79074	4.36759	2.42555	1.89461	2.52619	1.17256	1.43965	3.29434	3.87439	2.81737	3.60863	4.24786	5.73135	3.03509	2.26508	4.7002	2.36283	2.1397	4.64514
PF3D7_0707600.1	5.19057	7.3749	7.4964	2.44337	4.71596	4.52439	2.79682	2.81515	3.59801	3.04978	4.27445	4.27718	3.30472	1.83035	0.554647	3.46443	4.32328	5.16752	4.103	5.12883	7.66911	8.84822	3.60877	3.82401	4.1405	3.38946	3.77496	3.68669	6.45763	4.46587	7.41373	3.25334
PF3D7_0707700.1	8.28945	8.235	8.82139	7.1261	6.87819	7.01368	6.94519	6.97777	7.00205	7.18892	8.34171	7.8231	6.89508	6.87838	6.82768	8.3323	8.3488	8.14967	8.33065	8.34545	8.42484	8.27033	8.02595	7.81326	6.99941	7.50102	7.38383	8.06597	8.83357	7.98366	8.69605	7.97508
PF3D7_0707800.1	5.56098	7.47896	2.59339	4.12401	4.03083	2.0252	4.20367	4.55184	4.38481	4.19566	5.15049	4.14201	4.08118	2.41966	3.36562	4.79611	6.44624	4.63351	3.50494	4.97314	6.0986	6.4551	5.05111	3.5231	4.09658	3.55306	3.87463	5.57296	8.28276	4.6375	5.44833	5.79313
PF3D7_0707900.1	5.63716	5.57586	5.70414	7.01561	6.11992	6.98517	6.66567	7.19017	6.58357	6.40459	5.42288	7.28917	6.08954	7.18101	7.30888	5.8382	7.77143	5.80324	6.26438	5.90713	4.69702	5.27725	6.36253	6.55053	6.83975	6.41858	5.86585	6.39447	4.24922	4.93098	3.59429	5.91178
PF3D7_0708000.1	9.6378	8.40779	8.78113	10.7631	10.1761	12.5426	10.5108	11.2922	10.7382	10.0044	10.9097	12.1752	10.5935	10.3467	10.5167	9.60795	12.9748	9.86406	9.71809	10.8023	10.7251	11.4343	10.1787	10.1532	10.0814	10.4151	11.0577	10.3883	13.9954	10.7022	7.72053	10.078
PF3D7_0708100.1	4.69494	7.20518	-0.0689879	2.73893	3.2451	2.78333	3.52361	5.59179	4.9412	3.28315	4.7401	6.14584	3.39152	3.51141	6.35693	3.8474	6.01779	5.09402	3.55047	3.85046	2.0762	5.54308	5.16338	4.02366	4.9858	3.23843	5.76767	3.25031	0.782112	5.41757	7.86909	4.72924
PF3D7_0708200.1	4.80831	5.55556	0.126059	4.73087	3.82652	4.7757	3.31354	3.92713	4.84396	4.15026	4.09685	4.59635	4.94243	6.14403	5.47934	5.04788	6.19424	3.66478	4.51986	3.77613	3.58029	3.55097	4.46474	4.6536	3.8619	5.46212	6.26125	5.27595	4.99363	6.63439	4.79975	3.74283
PF3D7_0708300.1	5.34906	7.27672	11.2206	3.65024	4.87123	4.38997	2.47597	4.88115	3.55919	3.6462	5.8858	3.9118	1.86392	3.76057	0.929728	6.62467	6.00736	5.9031	4.76369	5.33863	7.80179	7.77216	4.8628	3.14459	5.09253	3.94401	5.02109	5.7167	2.98074	7.11202	7.54916	3.37031
PF3D7_0708400.1	10.0667	10.178	10.4151	10.6911	10.7009	10.6532	11.1595	11.087	10.9103	10.9836	9.99255	10.4538	10.4322	10.4905	10.6845	10.5579	9.14406	10.0085	9.97294	10.1178	10.4049	10.5375	10.1137	10.4323	10.7942	11.1592	11.2478	10.1762	10.3607	9.54998	9.74874	10.3098
PF3D7_0708500.1	9.38394	10.4739	9.11214	9.98465	9.62043	9.47458	10.9949	10.4701	10.1077	9.57731	9.1051	8.66565	9.80868	9.39994	10.8555	9.7266	9.36982	9.78837	10.5454	10.8628	9.16149	9.64482	10.1338	9.90334	10.35	10.2192	11.0096	9.92485	10.3053	9.46637	10.6742	10.739
PF3D7_0708600.1	14.1149	13.9723	20.5801	16.8183	14.7782	17.4428	16.3451	18.2061	16.2366	16.2203	14.8925	12.7621	17.706	12.5866	17.0549	16.5836	11.372	13.1533	15.9182	14.7503	14.0454	12.5438	17.3395	17.3468	16.4313	17.082	9.23711	16.0721	12.924	18.333	12.5178	21.0122
PF3D7_0708700.1	5.46763	8.02926	8.22541	5.3651	5.14551	6.30318	5.19452	6.09485	4.42981	4.45038	5.25391	5.81868	5.0721	3.18686	3.34283	4.74593	4.69419	4.00733	4.52408	3.72752	6.4558	6.79073	5.90534	4.48999	5.49519	4.55225	2.81076	5.15522	3.82491	5.62448	0.346936	6.5142
PF3D7_0708800.1	10.3341	10.6964	9.87679	9.70947	9.4896	9.86884	10.9393	10.2734	10.4136	10.1832	9.88704	10.2064	9.98123	10.6987	10.1484	10.1494	9.94244	9.96814	10.6285	10.5476	10.2192	10.4291	10.2663	10.2552	10.0955	10.333	10.3404	10.2306	9.98027	9.32134	9.31435	9.86353
PF3D7_0708900.1	4.90225	6.4745	7.31079	4.25803	2.90665	3.05446	2.93684	2.83185	3.44591	3.50426	5.88678	4.79254	3.69638	-0.126935	4.44259	4.3951	7.83888	5.51325	5.55587	5.80351	4.2522	4.91943	4.39465	4.74799	5.00849	3.62453	4.58499	5.29298	6.60235	4.99196	6.46891	7.95659
PF3D7_0709000.1	5.85449	6.59807	5.7975	8.27593	7.87933	8.00701	8.2463	8.59262	8.16361	8.02851	7.98561	7.97215	8.41611	8.32549	8.63249	7.71367	8.00745	7.98181	7.60026	7.55615	7.21597	7.50819	8.28623	7.74359	7.78463	8.11213	7.37164	7.86202	8.73349	7.80441	6.91065	7.88216
PF3D7_0709050.1	8.15201	12.8007	11.31	2.1589	1.73183	3.20148	10.1234	2.87078	9.71809	6.89195	9.51833	8.98389	5.9668	6.06121	4.32804	8.44895	4.48335	7.42652	6.56797	8.84671	9.25258	9.09443	7.90824	8.98768	6.16078	7.31247	2.34681	8.81578	4.01509	2.05941	4.48729	7.95878
PF3D7_0709100.1	6.24541	9.99148	10.5281	4.86647	5.04504	6.44593	4.81606	5.39273	4.70032	5.21874	6.16016	6.32697	5.94044	5.68274	5.85303	7.78889	11.3556	8.36714	8.67445	8.96591	6.31107	8.08843	7.42144	7.61368	6.32517	6.0089	8.74689	7.02389	4.79897	9.29247	9.44944	6.43462
PF3D7_0709200.1	10.0339	7.49663	16.8962	7.86785	9.96468	5.14168	8.18669	9.67651	8.55502	8.14147	9.76691	12.1213	8.59975	9.45424	9.19947	10.4028	14.6322	11.5937	12.2626	11.5657	9.72137	10.6791	9.91421	9.79852	7.83927	10.01	10.7882	9.61843	7.78503	11.13	6.93327	9.74544
PF3D7_0709300.1	6.15863	5.70963	6.68453	5.56403	5.23877	4.59964	5.20058	5.76549	4.74593	5.00747	6.35282	4.4541	5.75426	6.06378	5.65417	5.74998	6.64993	7.25073	7.21437	6.5985	5.9883	5.62858	5.93304	5.99458	4.95582	5.6528	6.50941	6.25744	6.49531	6.3236	6.79257	5.9737
PF3D7_0709400.1	11.3213	9.76925	9.11767	9.91972	9.91821	13.7267	12.9868	9.68839	11.8669	12.8415	9.82155	12.0569	12.8286	12.5305	12.8686	11.9278	8.15671	11.7476	11.1058	12.7706	10.8594	8.90324	10.8786	12.1533	10.2016	12.7688	13.1545	11.0809	14.183	12.9187	8.58004	11.7913
PF3D7_0709500.1	6.21077	6.60976	5.6469	5.65764	6.20292	1.38242	6.415	6.34436	6.53953	6.31967	7.03018	6.44743	7.20155	7.97703	4.66871	7.31326	6.74466	6.10404	5.06508	5.52318	7.98024	8.42691	5.87808	5.57601	4.79988	5.98502	6.16952	6.39681	5.88121	6.8655	5.45716	4.41417
PF3D7_0709600.1	5.43042	5.73499	5.81558	5.08698	5.534	5.90493	5.29336	4.9905	5.49797	5.90712	4.73112	5.0956	5.79747	4.99537	4.91889	5.61044	5.22042	5.56108	5.42385	5.86326	5.79173	5.31715	4.61062	5.19433	6.12776	5.61745	5.52395	4.58429	6.47893	4.82387	5.64368	5.03003
PF3D7_0709700.1	7.98426	5.79715	6.41049	9.74385	9.26997	10.9821	9.80587	10.2315	10.3234	9.40853	6.78186	9.20319	9.51913	12.9108	8.24011	9.10341	9.40299	8.59458	7.24919	8.47998	9.10497	10.8127	9.26155	8.106	9.78535	8.73757	7.60999	7.59645	7.05431	6.53142	11.0858	3.84605
PF3D7_0709800.1	1.62636	2.54251	2.93442	4.46487	1.92295	1.381	4.20504	3.51625	4.21323	4.03355	3.35632	0.0282924	3.32285	2.51141	1.80588	3.66071	2.50949	1.66974	0.131554	1.0015	3.36177	2.83432	4.6679	2.95864	2.27408	2.24345	-3.23212	3.7032	1.99774	2.61905	1.84444	4.06741
PF3D7_0709900.1	10.3629	9.25503	12.0969	10.8413	8.54102	11.3808	9.96159	9.64553	10.3767	9.34358	7.75373	10.414	8.64651	9.01859	9.92684	11.4529	8.57697	8.92922	9.18947	10.1333	9.44491	9.52613	9.80668	9.9903	9.6657	10.3229	11.4447	10.0459	8.78791	11.5986	8.65998	10.3228
PF3D7_0710000.1	4.13133	5.57195	2.71597	0.569198	3.36653	3.73364	3.39054	3.52522	4.1717	2.89704	3.87609	4.16897	3.61171	2.42545	2.95182	3.66757	2.50102	4.0727	2.0159	2.93931	4.38535	4.0366	3.07745	2.34428	4.01213	4.1151	3.23727	3.25543	3.73745	5.40766	3.75666	3.89262
PF3D7_0710100.1	4.64208	3.96768	2.0711	6.17188	6.30712	6.50564	7.21968	6.55911	7.44745	7.60394	3.34542	6.14334	6.53609	4.16261	7.932	4.85325	-0.652586	3.62367	2.46201	3.29048	3.76896	3.88975	4.61244	5.33857	6.51321	6.84168	5.33772	4.16523	4.598	5.72161	4.01407	7.3548
PF3D7_0710200.1	11.1225	11.1179	9.81619	9.75368	10.4461	10.4349	12.8776	10.999	12.2942	11.7483	11.0243	10.6684	10.5089	11.3937	11.9695	10.8317	10.6736	10.6021	11.0745	11.7474	10.3364	10.106	11.0469	10.9481	11.2773	10.9631	10.911	10.5774	10.5926	10.9274	10.471	11.5301
PF3D7_0710300.1	6.60298	12.6064	5.08995	8.65215	7.48861	8.32349	6.98717	9.15043	6.60581	5.86264	7.1979	3.13121	6.57442	5.40578	7.75793	6.10172	2.23507	7.22848	6.75326	7.04656	6.51764	7.17762	8.87843	7.4237	7.2847	6.19031	8.08752	7.29277	5.13689	7.71754	8.89589	9.58466
PF3D7_0710400.1	6.83542	10.0883	13.0139	6.9679	7.48302	6.06355	6.46415	2.14199	7.22546	6.14118	8.20371	2.74659	5.74759	4.61143	4.89131	5.13189	9.06244	7.79348	6.82064	7.53141	7.86633	7.04747	6.46626	7.00723	6.90565	6.6269	6.2843	7.19803	5.33797	8.37156	9.4224	8.56939
PF3D7_0710500.1	7.21198	13.2969	5.74371	3.48102	7.39821	9.36683	7.24069	4.28194	7.87427	6.30458	8.03848	4.99663	6.99864	7.19441	6.23528	7.51605	4.46863	7.11484	7.59652	7.93161	7.8862	6.76035	7.73662	7.29265	7.84169	6.69739	8.59166	7.98972	5.8271	7.55458	12.1842	6.50969
PF3D7_0710600.1	9.49738	10.1835	9.61243	10.2489	9.97168	10.0329	10.6914	9.94422	10.675	9.68142	9.02544	9.33387	9.24225	10.4398	9.27281	9.55179	9.22126	10.084	10.187	10.1148	10.2629	10.0819	9.82823	9.86168	9.90708	8.77757	9.18998	9.9276	9.90265	9.01359	9.0129	9.2318
PF3D7_0710700.1	8.05541	8.51291	7.78739	7.84527	7.47599	7.63782	8.69504	8.42251	8.98588	8.69679	7.37461	7.96723	7.42774	8.21888	7.80584	7.81871	7.96335	7.88881	7.95391	8.22543	8.31188	8.9599	7.61427	7.85832	8.85505	7.66438	7.28173	8.22217	7.4181	7.84409	8.59002	7.68282
PF3D7_0710800.1	6.5923	7.99953	8.4583	6.8204	7.10871	7.21146	6.73738	6.05223	6.26826	5.97919	6.8423	4.3653	6.51665	8.04008	4.76854	6.33812	8.60387	8.41706	7.95359	8.09349	8.84404	8.19353	6.71442	6.33464	6.89158	6.29002	5.92458	7.6966	8.06708	8.71715	8.59977	5.5588
PF3D7_0710900.1	2.63959	2.8106	4.87815	3.2616	3.68903	1.79406	2.25858	3.97239	3.24349	3.12609	2.39486	5.02513	3.46609	-2.30489	5.89564	4.20134	5.76749	3.76749	3.06936	2.33776	0.601922	2.30435	3.68877	3.05672	4.19453	3.50727	5.57641	1.4756	4.12967	4.11266	3.71737	7.60195
PF3D7_0711000.1	5.68076	6.0371	5.58317	7.08019	7.06919	6.14636	7.22482	6.19482	6.68703	7.13557	5.26625	7.32912	7.42776	6.82013	7.03516	5.85205	5.90076	5.92147	6.35733	6.31449	6.064	6.50629	6.00892	6.37963	6.50812	7.09406	7.42385	5.67033	6.86602	5.42973	3.89707	6.24766
PF3D7_0711100.1	4.24164	6.45983	6.26662	1.58023	2.79212	3.21074	1.75744	3.10236	2.7092	2.25542	4.39056	3.22912	2.48238	1.84718	-0.0686438	4.40984	4.7663	4.37015	2.61119	4.85784	6.73303	7.23296	3.73999	3.11573	2.30433	2.17532	3.3034	4.03296	5.68669	4.96726	5.15209	2.61605
PF3D7_0711200.1	6.16921	1.53269	7.16268	4.26077	5.97783	6.20243	4.00048	4.85526	5.17941	4.6176	6.74722	6.50847	4.8542	7.79154	2.62903	6.8743	7.72514	5.56044	6.05296	5.45356	8.4596	7.0944	4.55764	4.13087	4.22054	5.77673	6.06219	5.61229	8.97001	6.72505	6.42079	1.58038
PF3D7_0711300.1	5.1051	4.48145	5.58787	5.50877	5.50267	7.63084	5.85862	8.8394	7.70048	5.53962	7.81584	8.71499	6.48313	7.5076	6.78042	3.85616	8.40035	6.75953	5.91213	7.01358	6.3524	7.56639	1.69325	5.31747	9.00835	6.0127	8.93352	6.38064	5.75323	8.87667	3.55104	4.72792
PF3D7_0711400.1	9.35918	11.8095	7.51706	8.10805	9.13079	8.17234	7.5149	10.3768	8.73033	8.04281	9.91833	5.77444	7.80701	7.37952	7.99374	9.55516	10.8313	8.50181	8.9318	9.88045	9.97452	9.98083	9.3024	8.41482	8.63819	9.19171	10.2657	9.30113	12.3161	10.0261	12.3944	9.40881
[truncated: 3,535 more rows]

## Sheet: Supplemetary Table 3
Differentially expressed genes among the uninfected, asymptomatic and febrile sample groups
Gene ID	Gene Symbol	Cluster	logFC.FMvsAS	logFC.FMvsHC	logFC.ASvsHC	logCPM	LR	PValue	FDR
[truncated: 4,311 more rows]

## Sheet: Supplementary Table 4
		a) KEGG analysis results from genes differentillyr expressed in each cluster.
[truncated: 130 more rows]

[truncated: 2 more sheets: Supplementary Table 5, Supplementary Table 6]
